# Supplementary material
Source: PubMed Central journal article supplement (PMC7909746)
Supplement: NIHMS1669435-supplement-Supplementary_Info.pdf [file NIHMS1669435-supplement-Supplementary_Info.pdf]

## *Supporting Information*

# **On The Nature of C(sp<sup>3</sup>)-C(sp<sup>2</sup>) Bond Formation in Nickel-Catalyzed Tertiary Radical Cross-Couplings: A Case Study of Ni/Photoredox Catalytic Cross-Coupling of Alkyl Radicals and Aryl Halides**

Mingbin Yuan,<sup>[a]</sup> Zihui Song,<sup>[a]</sup> Shorouk O. Badir,<sup>[b]</sup> Gary A. Molander,<sup>\*,[b]</sup> and Osvaldo Gutierrez<sup>\*,[a]</sup>

*<sup>[a]</sup>Department of Chemistry and Biochemistry, University of Maryland, College Park, Maryland 20742, United States*

*<sup>[b]</sup>Roy and Diana Vagelos Laboratories, Department of Chemistry, University of Pennsylvania, Philadelphia, Pennsylvania 19104-6323, United States*

Email: <sup>[a]</sup>ogs@umd.edu; <sup>[b]</sup>gmolandr@sas.upenn.edu

## Table of Contents

|                                                                                     |      |
|-------------------------------------------------------------------------------------|------|
| A. Computational Details and Details on Quasi-Classical Direct-Dynamics Simulations | S3   |
| B. Input Parameters on Progdyn                                                      | S4   |
| C. Energetics with Different Methods and Conformational Search                      | S9   |
| D. Experimental Details                                                             | S31  |
| E. Coordinates and Energies of Optimized Structures in Computation                  | S34  |
| F. References                                                                       | S233 |

## A. Computational Details and Details on Quasi-Classical Direct-Dynamics Simulations

All geometry optimizations of intermediates and transition states were achieved using spin-unrestricted UB3LYP<sup>1</sup>-D3<sup>2</sup>/def2-SVP<sup>3</sup> method, in THF solvent using the CPCM solvent model<sup>4</sup> with “opt=noeigen” and “guess=mix” keywords as implemented in Gaussian09<sup>5</sup>. Frequency calculations were also conducted at the same level of theory to obtain vibrational frequencies to determine the identity of stationary points as intermediates (no imaginary frequencies) or transition states (only one imaginary frequency), as well as obtaining the thermal corrections to enthalpy ( $H_{\text{correction}}$ ) and free energy ( $G_{\text{correction}}$ ) at the temperature of 298 K. Energies were refined by computing single point energies in implicit solvent with UB3LYP-D3/def2-TZVPP<sup>3</sup> method using larger basis set compared to optimization method. To explore the effect of DMA solvent in Ni-TMHD catalytic system, single point energy was also calculated in implicit DMA solvent as labeled as UB3LYP-D3/def2-TZVPP-CPCM(DMA)//UB3LYP-D3/def2-SVP-CPCM(THF). For comparison, single point energies were also computed using UM06<sup>6</sup>/def2-TZVPP method using Gaussian 09<sup>5</sup>. Moreover, domain-based local pair-natural orbital coupled-cluster calculations using single and double excitations with perturbative triple excitations (DLPNO-CCSD(T))<sup>7</sup> were performed with def2-TZVPP as basis set and def2-TZVPP/C as auxiliary basis set using ORCA software<sup>8</sup>. This method was used to obtain energy with high accuracy at affordable computational cost compared to DFT calculations.<sup>9</sup> Free energies obtained with each method was calculated generally as  $G^{\text{method-solvent}} = E^{\text{method-solvent}} + G_{\text{correction}}$ . In part E, single point energies obtained directly with each method ( $E^{\text{method-solvent}}$  computed with UB3LYP-D3 and UM06 methods, and  $E^{\text{DLPNO-CCSD(T)-gas}}$  computed with DLPNO-CCSD(T) method) would be shown. All structural figures were generated with CYLview.<sup>10</sup> Distances in structural figures are shown in Å and energies are in kcal/mol.

Molecular dynamics (MD) simulations were performed in the gas phase on the truncated doublet transition states <sup>2</sup>I'-TS (shown in Figure S7) and <sup>2</sup>K-TS (shown in Figure S20). The truncated <sup>2</sup>I'-TS and <sup>2</sup>K-TS were located at the UB3LYP-D3/def2-SVP level of theory using Gaussian 09 with HOMO-LUMO mixing for the initial guess in both transition state optimization and dynamics simulation. Quasi-classical direct-dynamics simulations were then initialized within the region of the potential energy surface near <sup>2</sup>I'-TS and <sup>2</sup>K-TS, adding zero-point energy for each real normal mode in corresponding transition states, plus a Boltzmann sampling of thermal energy available at 298.15 K with a random phase. The trajectories were propagated backward on <sup>2</sup>I'-TS and forward on <sup>2</sup>K-TS (settings are made on “searchdir” keyword line as shown in Section B), with focus on observing possible radical dissociation or C(sp<sup>2</sup>)-C(sp<sup>3</sup>) bond formation within the lifetime of Ni(III) intermediate. Parameters of radical dissociation concomitant with generation of Ni(II) intermediate were set as <sup>1</sup>G/<sup>1</sup>G' ( $C_{\text{Ph}}-C_{t\text{Bu}} > 3.00 \text{ \AA}$  and  $\text{Ni}-C_{t\text{Bu}} > 2.70 \text{ \AA}$ ) for <sup>2</sup>K-TS and <sup>1</sup>G/<sup>1</sup>G' ( $C_{\text{Ph}}-C_{t\text{Bu}} > 3.00 \text{ \AA}$  and  $\text{Ni}-C_{t\text{Bu}} > 3.50 \text{ \AA}$ ) for <sup>2</sup>I'-TS or product formation as <sup>2</sup>P<sub>B</sub> + tBu-Ph ( $C_{\text{Ph}}-C_{t\text{Bu}} < 1.70 \text{ \AA}$  and  $\text{Ni}-C_{t\text{Bu}} > 5.00 \text{ \AA}$ ) based on corresponding distances at the transition states. The classical equations of motion were integrated with a velocity-Verlet algorithm using Singleton's program Progdyn<sup>11</sup>, with the energies and derivatives computed using the UB3LYP-D3/def2-SVP method with Gaussian 09. The step length for integration was 1 fs.

## B. Input Parameters on Progdyn

The configuration file progdyn.conf for trajectory initialization for the doublet reduction elimination transition state  $2^1\text{I}^-\text{TS}$  is given below as an example.

```
#!/This is the configuration file for PROGDYN. This file is read by progdynstarterHP and
# the awk programs proggenHP, prog1stpoint, prog2ndpoint, and progdynb.
#The programs won't read anything past the first blank line,
#and this file must end with a blank line.
#The program has a number of default values but they are unlikely to be what you want.
#Do not delete lines - rather, comment out lines for unwanted options.
#The values here are read repeatedly and most can be changed in the middle of running
jobs
***The keywords are case sensitive. The following keywords should always be
defined:***
***method, charge, multiplicity, memory, processors, title
*** method --The following word is copied exactly to the gaussian input file.
method ub3lyp/def2svp
#To do a nonstandard route, make nonstandard 1. For normal calcs, use nonstandard 0 or
else leave it out.
#Then make a file called "nonstandard" containing the nonstandard route with no extra
lines.
nonstandard 0
# NMRoptions As is NMR=1 will add a section for an NMR calc at every NMRevery intervals.
If you want to combine the two use nonstandard
#NMRtype 1
#NMRmethod B3LYP/cc-pvtz
#NMRevery 4
#geometry linear
rotationmode 1
*** method2 --The options here are restricted, unrestricted, and read. restricted is the
default
#If the method is U..., put unrestricted here and the .com files will have in them guess=mix.
#If you put read here, the .com files will contain guess=tcheck, which sometimes makes
things faster, sometimes not.
#The use of read requires a specifically defined checkpoint file name using the keyword
checkpoint.
method2 unrestricted
charge 0
multiplicity 2
processors 32
*** memory --The following "word" is copied exactly to the gaussian input file
after %mem=.
memory 64gb
*** killcheck and checkpoint -- You can use a specifically defined checkpoint file name by
putting
```

```

#the name after the keyword checkpoint. This is necessary if you use the read option with
method2.
#Defined checkpoint names are an unnecessary modest hassle and if you do not want to
bother, use killcheck 1
killcheck 1
#checkpoint g09.chk
#*** diagnostics -- 0 prints out nothing extra, 1 (default) prints out extra stuff to a
#file "diagnostics", 2 adds more stuff, 3 adds velocities to a file "vellist"
#4 adds the apparent temperature to vellist, but this is meaningless with quasiclassical
calculations
diagnostics 1
#*** title -- the title keyword must be followed by exactly four words
title j j j Ni-trun-TS-RE-r2-g
#*** initialdis -- 0 (default) turns off displacement of the normal modes, so that all
trajectories start from the same place
# and only the energies and signs of the motion in the modes are randomized
# 1 gives a flat distribution of displacements where all of the possible values are equally
likely
# 2 (recommended) gives a QM-like gaussian distribution of displacements, so that
displacements in the middle are more likely than
# those at the end by 1/e
initialdis 2
#*** timestep -- this is the time bet*-ween points in the trajectory. Typical values would be
1E-15 or 0.5E-15 or 0.25E-15
timestep 1E-15
#*** scaling -- this lets you scale the gaussian frequencies by a constant
scaling 1.0
temperature 298.15
#*** method3, method4, method5, and method6 -- These keywords let you add extra lines
to the gaussian input file.
#method3 and method4 add lines at the top of the input after the lines defining the method,
and
#this is useful to implement things like the iop for mPW1k
#method5 and method6 add lines after the geometry, after a blank line of course
#only a single term with no spaces can be added, one per method line. Here are some
examples to uncomment if needed
#add the line below with big structures to get it to put out the distance matrix and the
input orientation
#method3 iop(2/9=2000)
#method4 iop(3/124=3)
#method5 eps=32.63
#method6 rsolv=1.329
#*** methodfile -- This keyword lets you add more complicated endings to gaussian input
files
#such as a gen basis set. Put after the keyword the number of lines in a file you create
called

```

```

#methodfile that contains the test you want to add to the end of the gaussian input
methodfile 0
**** numimag --This tells the program the number of imaginary frequencies in the starting
structure.
#if 0, treats as ground state and direction of all modes is random
#if 1, motion along the reaction coordinate will start out in the direction defined by
searchdir
#if 2, only lowest freq will go direction of searchdir and other imag mode will go in random
direction
numimag 2
**** searchdir -- This keyword says what direction to follow the mode associated with the
imaginary frequency.
#The choices are "negative" and "positive". Positive moves in the direction defined in the
gaussian frequency calculation
#for the imaginary frequency, while negative moves in the opposite direction. The correct
choice can be made either
#by a careful inspection of the normal modes and standard orientation geometry, or by
trial and error.
searchdir positive
**** classical -- for quassiclassical dynamics, the default, use 0. for classical dynamics, use
1
#if there are no normal modes and the velocities are to be generated from scratch, use
classical 2
classical 0
**** DRP, saddlepoint, and maxAtomMove --to run a DRP use 'DRP 1' in the line below,
otherwise leave it at 0 or comment it out
#the treatment of starting saddlepoints is not yet implemented so use saddlepoint no
#if DRP shows oscillations then decrease maxAtomMove
#DRP 1
#saddlepoint no
#maxAtomMove 0.01
**** cannonball -- The program can "fire" a trajectory from a starting position toward a
particular target, such as toward
#a ts. To use this, make a file cannontraj with numAtom lines and three numbers per line
that defines the vector
#for firing the trajectory, relative to the starting geometry's standard orientation. The
number following cannonball sets
#the extra energy being put into the structure in kcal/mol
#cannonball 10
**** keepevery --This tells the program how often to write the gaussian output file to file
dyn, after the first two points.
#Use 1 for most dynamics to start with, but use a higher number to save on disk space or
molden loading time.
keepevery 1
**** highlevel --For ONIOM jobs, the following line states the number of highlevel atoms,

```

```

#which must come before the medium level atoms. Use some high value such as 999 if not
using ONIOM
highlevel 999
*** fixedatom1, fixedatom2, fixedatom3, and fixedatom4 - These fix atoms in space.
#Fixing one atom serves no useful purpose and messes things up, while fixing two atoms
#fixes one distance and fixing three has the effect of fixing three distances, not just two
#in current form fixed atoms only are meant to work with no displacements, that is,
initialdis=0
#fixedatom1 2
#fixedatom2 3
#fixedatom3 19
*** boxon and boxsize - With boxon 1, a cubic box is set such that atoms that reach the
edge
#are reflected back toward the middle. Useful for dynamics with solvent molecules. This is
a crude
#implementation that is ok for a few thousand femtoseconds but will not conserve energy
long term.
#Set the box size so as to fit the entire initial molecule but not have too much extra room.
#The dimensions of the box are two times the boxsize, e.g. boxsize 7.5 leads to a box that is
15 x 15 x 15 angstroms
boxon 0
boxsize 7.5
*** displacements -- This keyword lets you set the initialdis of particular modes by using a
series of lines of the format
# displacements NumberOfMode InitialDisForThatMode, as in the example below. You
should be able to do as many of these as you like
# you might consider this for rotations where a straight-line displacement goes wrong at
large displacements
# The choices for InitialDisForThatMode are 0, 1, 2, and 10, where 10 does the same thing
as 0 but is maintained for now because
# a previous version of the program had a bug that made 0 not work.
#displacements 2 0
#displacements 3 0
*** etolerance --This sets the allowable difference between the desired energy in a
trajectory and the actual
#energy, known after point 1 from the potential energy + the kinetic energy in the initial
velocities.
#The unit is kcal/mol and 1 is a normal value for mid-sized organic systems. For very large
and floppy molecules, a larger value
#may be needed, but the value must stay way below the average thermal energy in the
molecule (not counting zpe).
#If initialdis is not 0 and few trajectories are being rejected, decrease the value.
etolerance 0.5
*** controlphase --It is sometimes useful to set the phase of particular modes in the
initialization of trajectories.

```

#The format is controlphase numberOfModeToControl positive or controlphase numberOfModeToControl negative.

#controlphase 2 positive

\*\*\* damping -- The damping keyword lets you add or subtract energy from the system at each point, by multiplying the velocities

#by the damping factor. A damping of 1 has no effect, and since you mostly want to change the energy slowly, normal values range

#from 0.95 to 1.05. The use of damping lets one do simulated annealing - you add energy until the structure is moving enough

#to sample the kinds of possibilities you are interested in, then you take away the energy slowly.

damping 1

\*\*\* revesetraj --This keyword sets the trajectories so that both directions from a transition state are explored.

revesetraj true

#updated Aug 9, 2007 to include the possibility of classical dynamics by the keyword classical

#updated Jan 2008 to include fixed atoms, ONIOM jobs, keepevery, and box size

#update Feb 2008 to include methodfile parameter

# updated Nov 2008 to allow for start without an initial freq calc using classical = 2

# update Aug 2010 to include etolerance, damping controlphase and revesetraj



### C. Energetics with Different Methods and Conformational Search

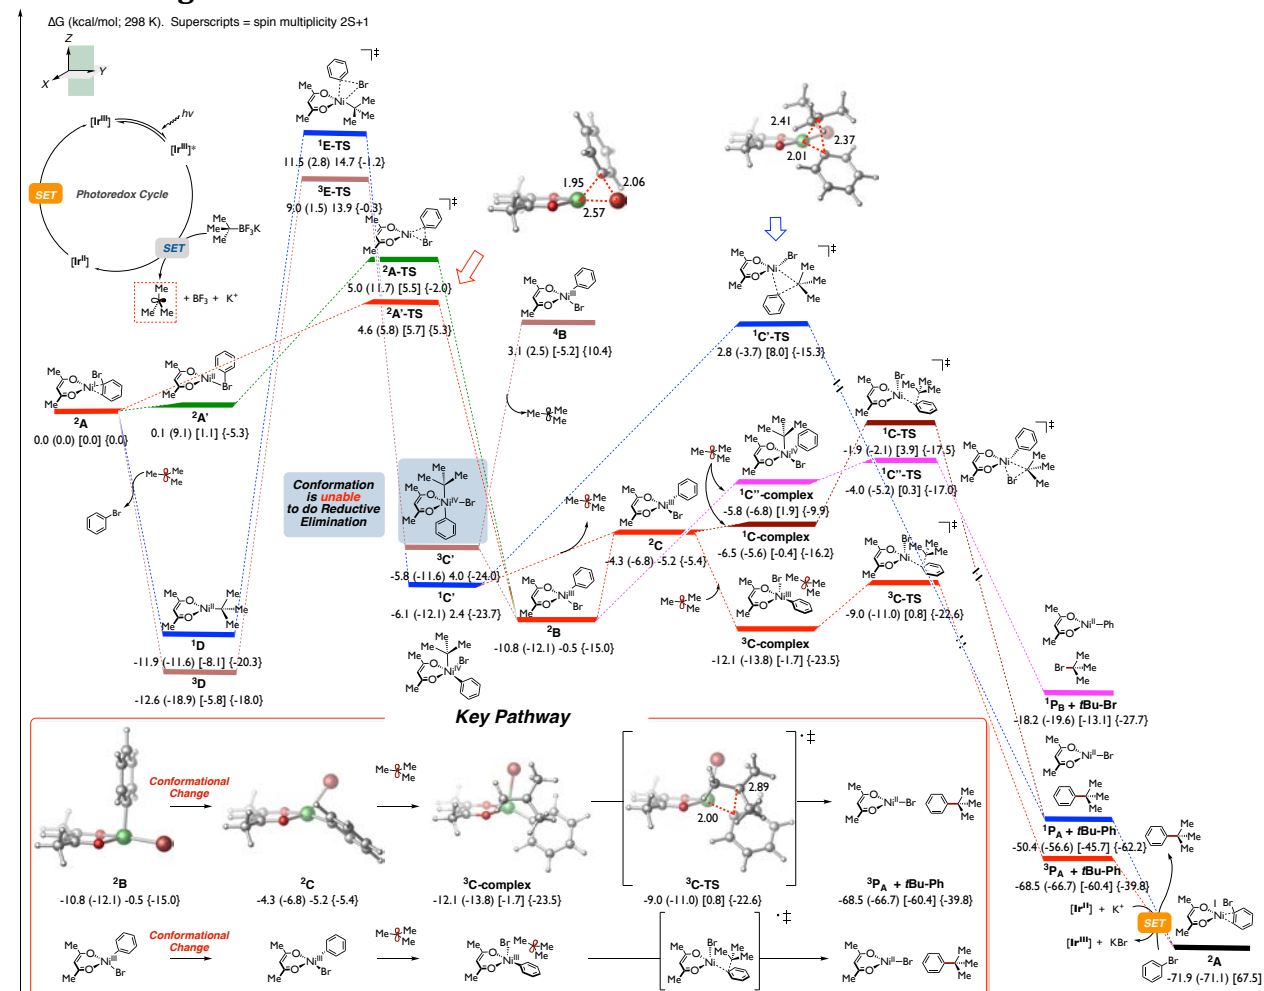

**Figure S1.** Calculated energetics of the Ni-catalyzed cross-coupling between *tert*-butyl radical and phenyl bromide using anionic TMHD as ligand. Free energies (kcal/mol) were computed at the UB3LYP-D3/def2-TZVPP-CPCM(DMA)//UB3LYP-D3/def2-SVP-CPCM(THF), UB3LYP-D3/def2-SVP-CPCM(THF) (in parenthesis), UM06/def2-TZVPP-CPCM(DMA)//UB3LYP-D3/def2-SVP-CPCM(THF) (in bracket), and DLPNO-CCSD(T)/def2-TZVPP-gas//UB3LYP-D3/def2-SVP-CPCM(THF) (in brace) levels of theory. Energetics of the last SET step was calculated in UB3LYP-D3/def2-TZVPP-CPCM(THF)//UB3LYP-D3/def2-SVP-CPCM(THF), UB3LYP-D3/def2-SVP-CPCM(THF) (in parenthesis), UM06/def2-TZVPP-CPCM(THF)//UB3LYP-D3/def2-SVP-CPCM(THF) (in bracket) levels of theory for better comparison with the Ni-bipyridine system.

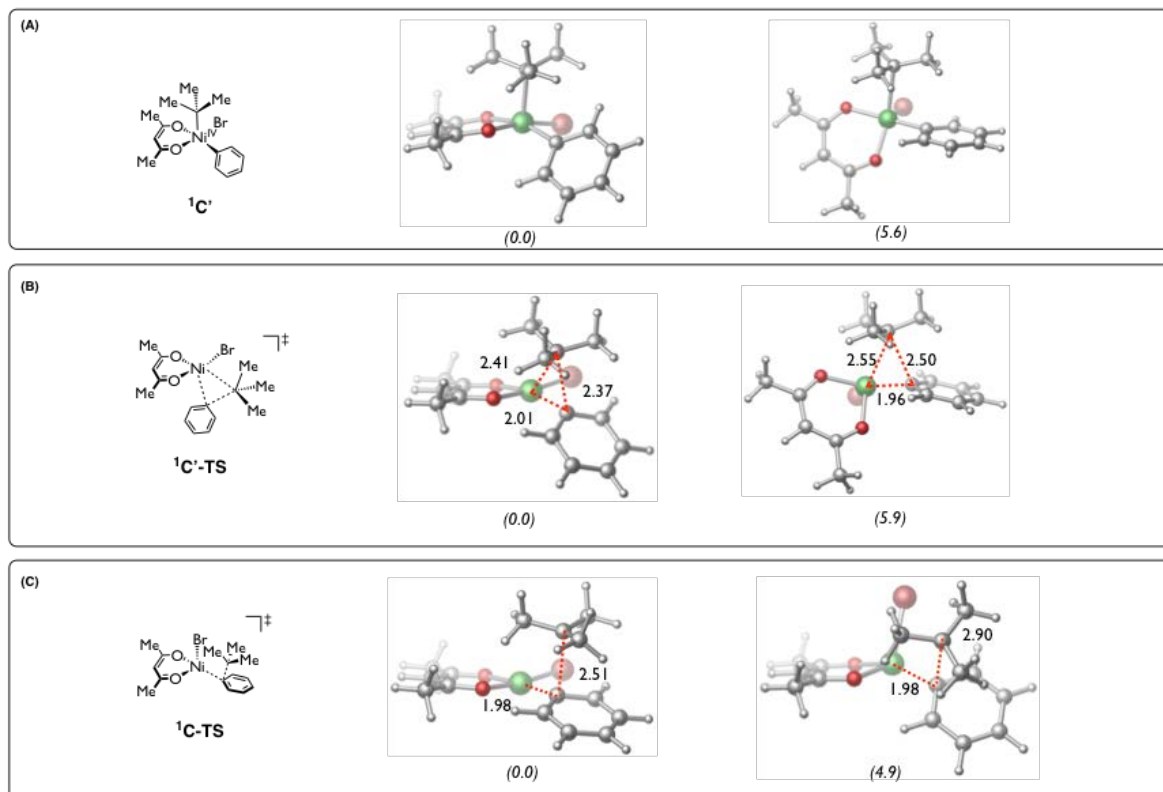

**Figure S2.** Conformational search of key intermediates and transition states of Ni-catalyzed cross-coupling between *tert*-butyl radical and phenyl bromide using anionic TMHD as ligand. Relative free energies (kcal/mol) were calculated with respect to corresponding lowest-energy level structure at the UB3LYP-D3/def2-SVP-CPCM(THF) (in parenthesis) level of theory.

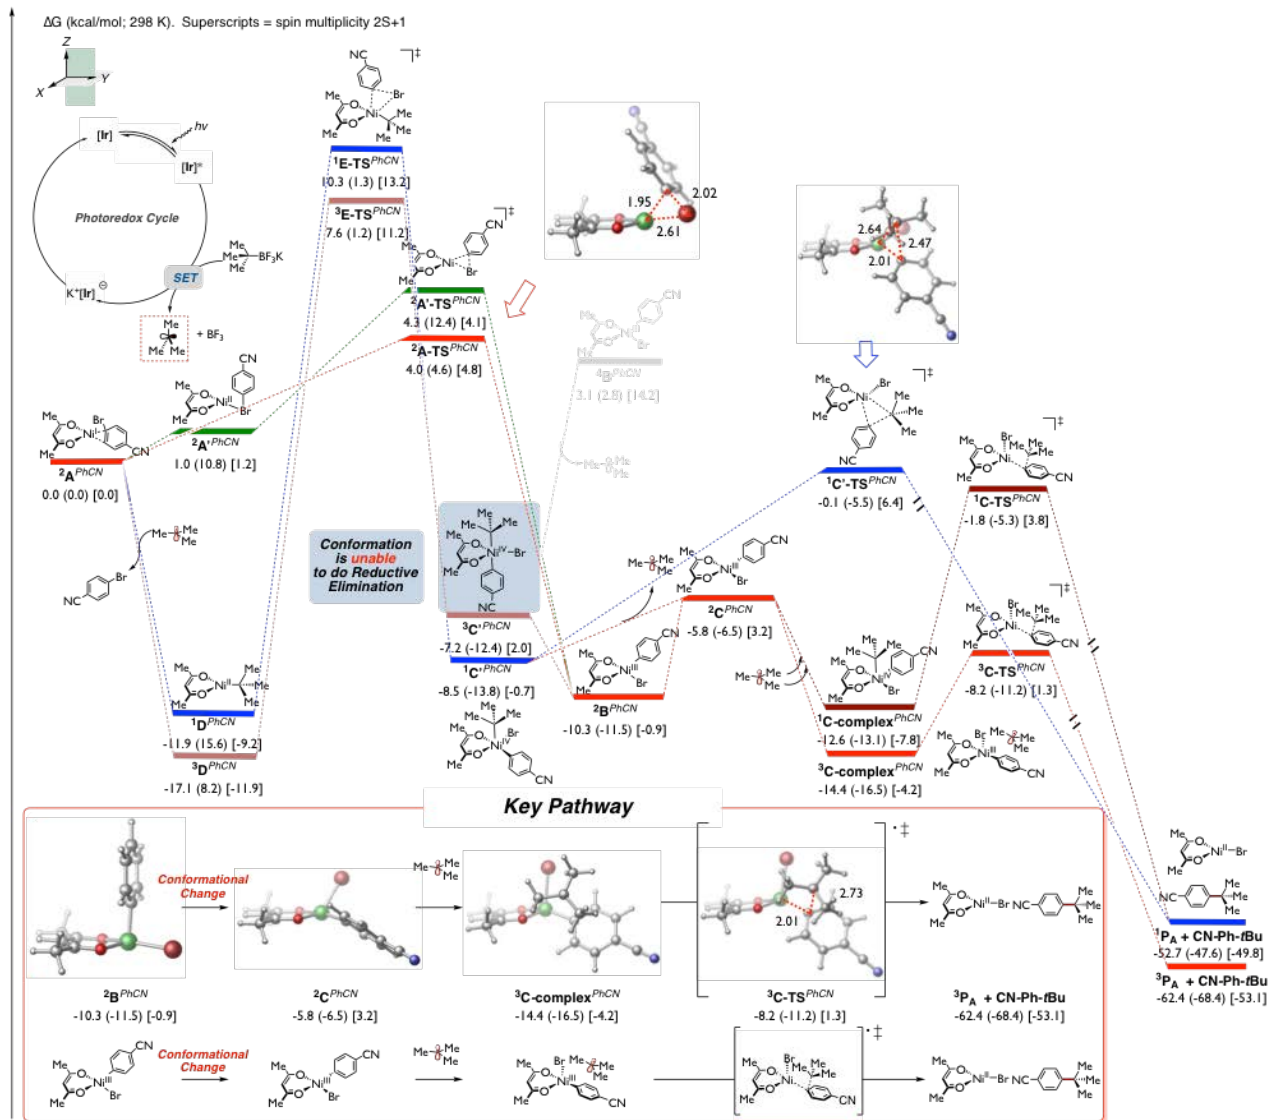

**Figure S3.** Calculated energetics of the Ni-catalyzed cross-coupling between *tert*-butyl radical and 4-bromobenzonitrile using anionic acac as ligand. Free energies (kcal/mol) were computed at the UB3LYP-D3/def2-TZVPP-CPCM(THF)//UB3LYP-D3/def2-SVP-CPCM(THF), UB3LYP-D3/def2-SVP-CPCM(THF) (in parenthesis) and UM06/def2-TZVPP-CPCM(THF)//UB3LYP-D3/def2-SVP-CPCM(THF) (in bracket) levels of theory.

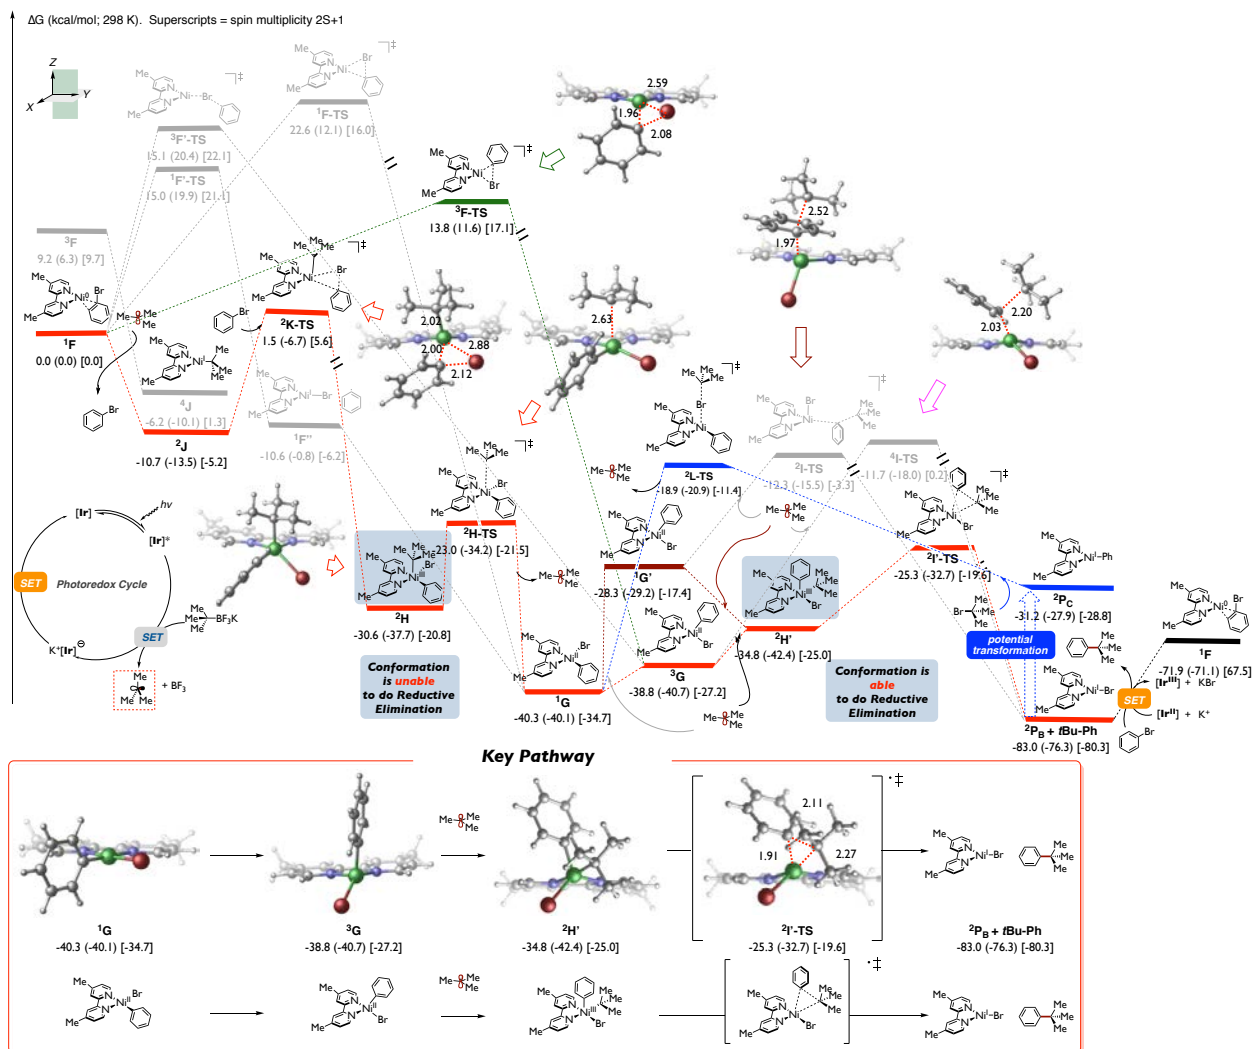

**Figure S4.** Calculated energetics of the Ni-catalyzed cross-coupling between *tert*-butyl radical and phenyl bromide using neutral bipyridine as ligand. Free energies (kcal/mol) were computed at the UB3LYP-D3/def2-TZVPP-CPCM(THF)//UB3LYP-D3/def2-SVP-CPCM(THF), UB3LYP-D3/def2-SVP-CPCM(THF) (in parenthesis), and UM06/def2-TZVPP-CPCM(THF)//UB3LYP-D3/def2-SVP-CPCM(THF) (in bracket) levels of theory.

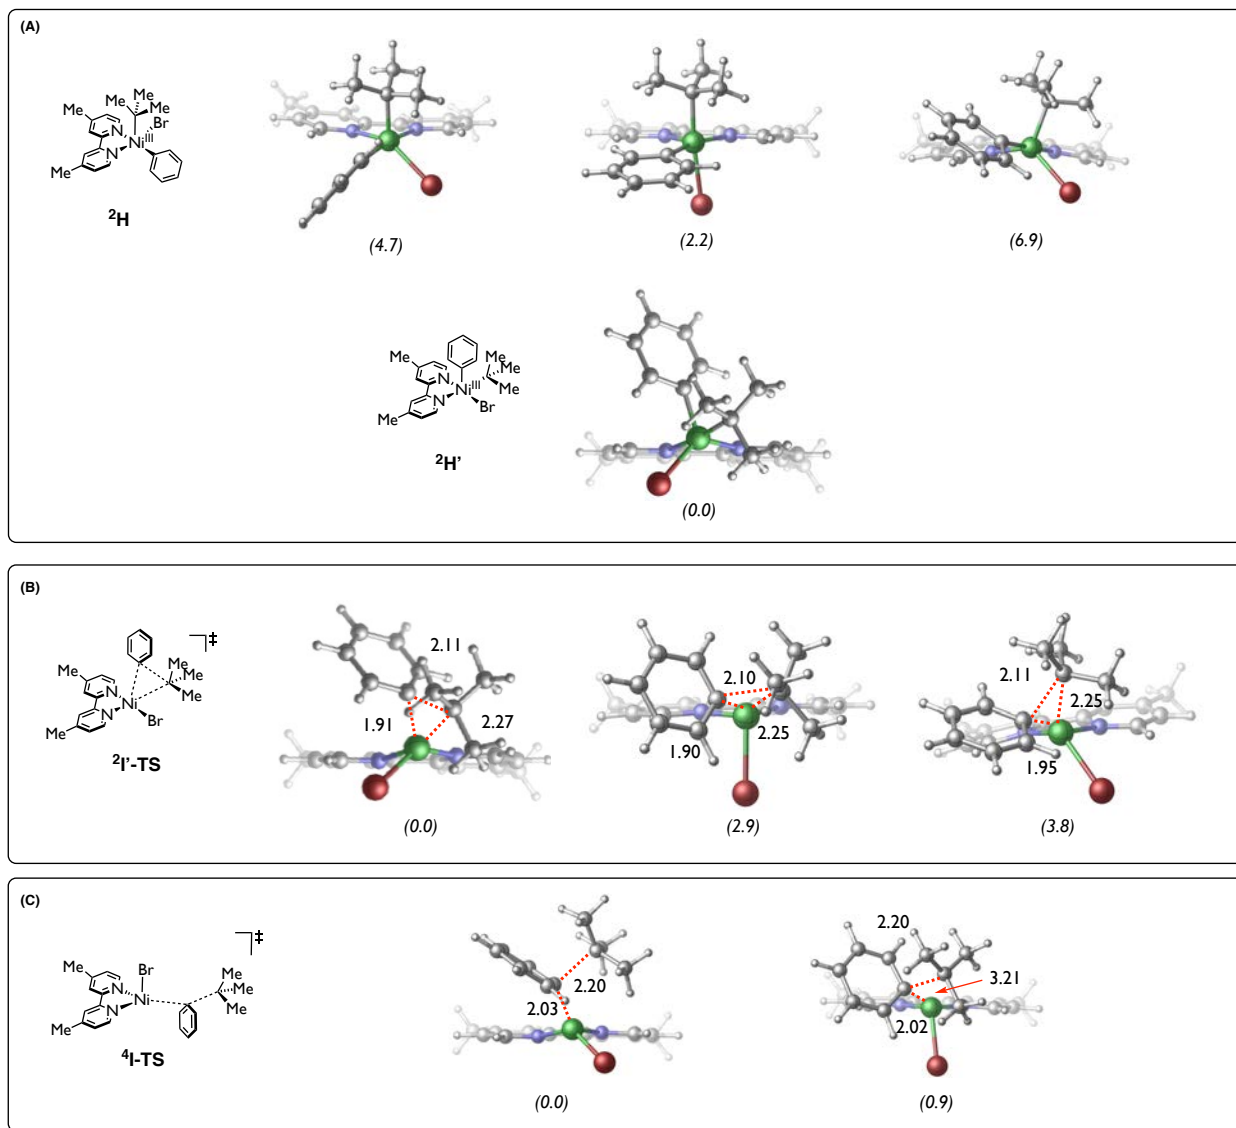

**Figure S5.** Conformational search of key intermediates and transition states of Ni-catalyzed cross-coupling between *tert*-butyl radical and phenyl bromide using neutral bipyridine as ligand. Relative free energies (kcal/mol) were calculated with respect to corresponding lowest-energy level structure at the UB3LYP-D3/def2-SVP-CPCM(THF) (in parenthesis) level of theory.

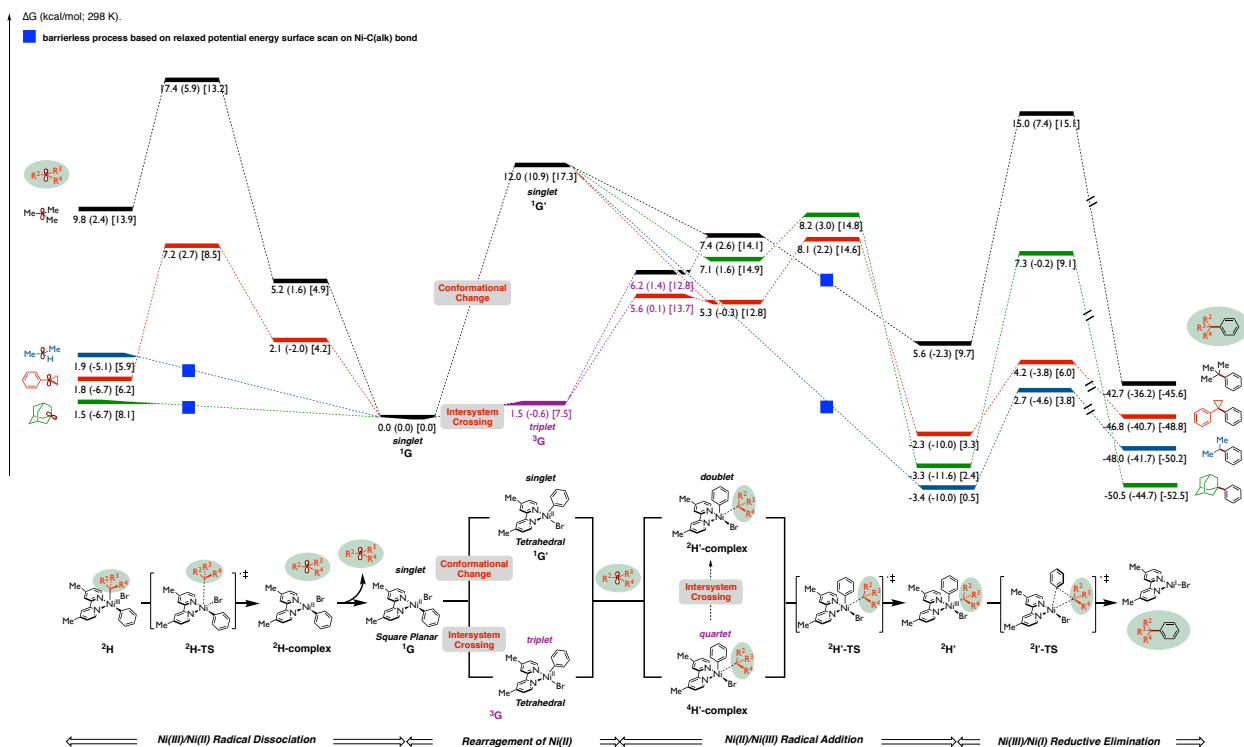

**Figure S6.** Calculated energetics of the key pathway using neutral bipyridine as ligand and *tert*-butyl radical (black), *iso*-propyl radical (blue), 1-phenylcyclopropyl radical (red) and adamantly radical (green) as radical substrates. Free energies (kcal/mol) were computed at the UB3LYP-D3/def2-TZVPP-CPCM(THF)//UB3LYP-D3/def2-SVP-CPCM(THF), UB3LYP-D3/def2-SVP-CPCM(THF) (in parenthesis), and UM06/def2-TZVPP-CPCM(THF)//UB3LYP-D3/def2-SVP-CPCM(THF) (in bracket) levels of theory.

Starting from *singlet spin square planar* Ni(II) species  $1G$ , *tert*-butyl radical can undergo radical addition from axial position via  $2H$ -TS to generate the endergonic Ni(III) intermediate  $2H$ , which is a reversible process so *tert*-butyl radical is less favorable to be bound to Ni center. Alternatively,  $1G$  could undergo conformational change or intersystem crossing to generate *singlet spin tetrahedral* Ni(II) species  $1G'$  and *triplet spin tetrahedral*  $3G$ , respectively. Upon interaction with *tert*-butyl radical, Ni species can form doublet or quartet (purple energy values) complex, then after barrierless radical addition (blue squares, based on relaxed potential energy surface scan on Ni-C bond) Ni(III) species  $2H'$  could be formed. More importantly, the barrier of reductive elimination step of *tert*-butyl radical (15.0 kcal/mol with respect to  $1G$ ) is much higher than those with other alkyl radicals. This might explain the observed failure with *tert*-butyl radical substrate and the success of adamantly and 1-phenylcyclopropyl radicals in experiment.<sup>13</sup>

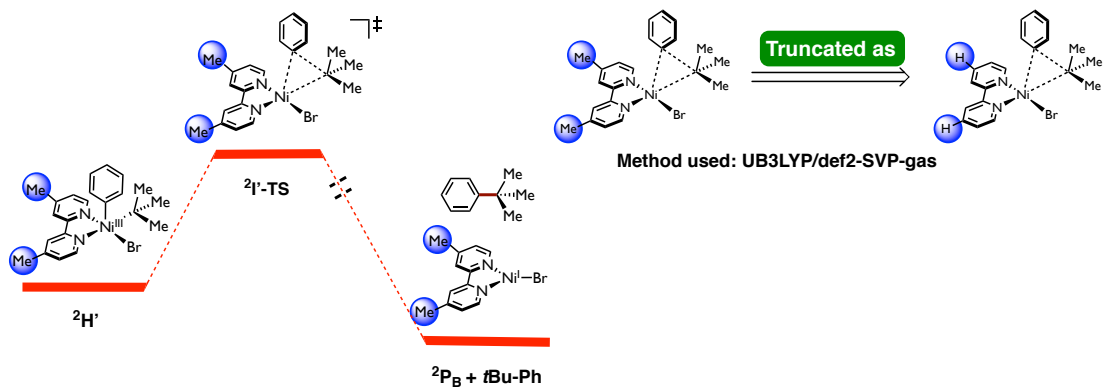

(A) example of reverse direction from  $2I'$ -TS

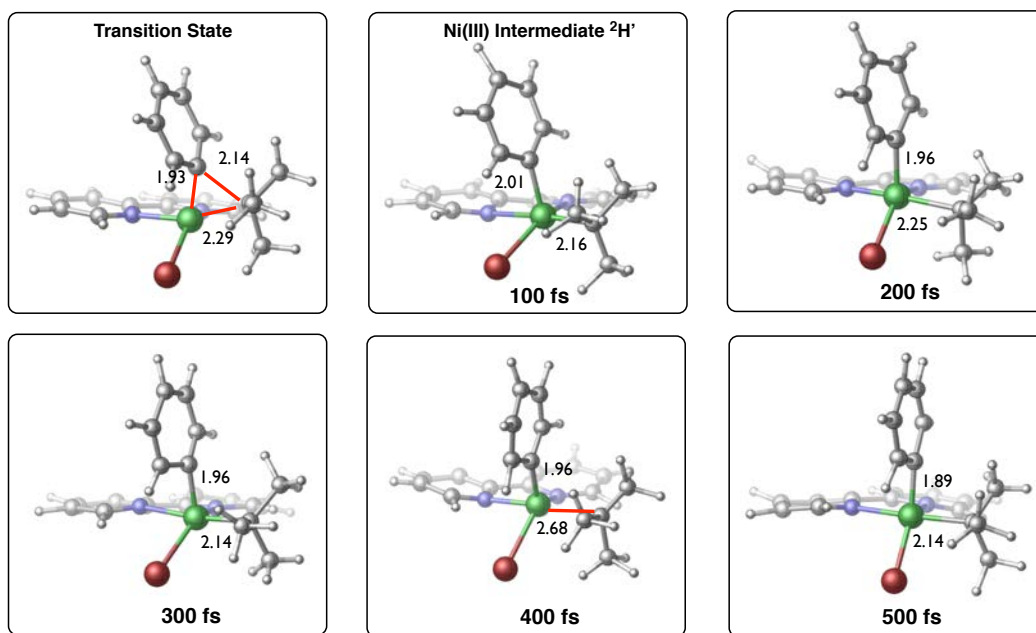

(B) example of forward direction from  $2I'$ -TS

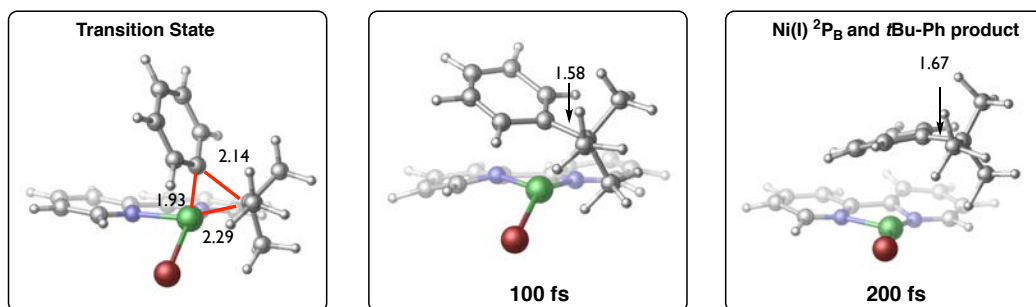

**Figure S7.** Snapshots of representative examples of quasi-classical dynamic calculation of truncated system from reductive elimination transition state  $2I'$ -TS in both forward and backward directions of Ni-catalyzed cross-coupling between *tert*-butyl radical and phenyl bromide in Ni-bipyridine system.



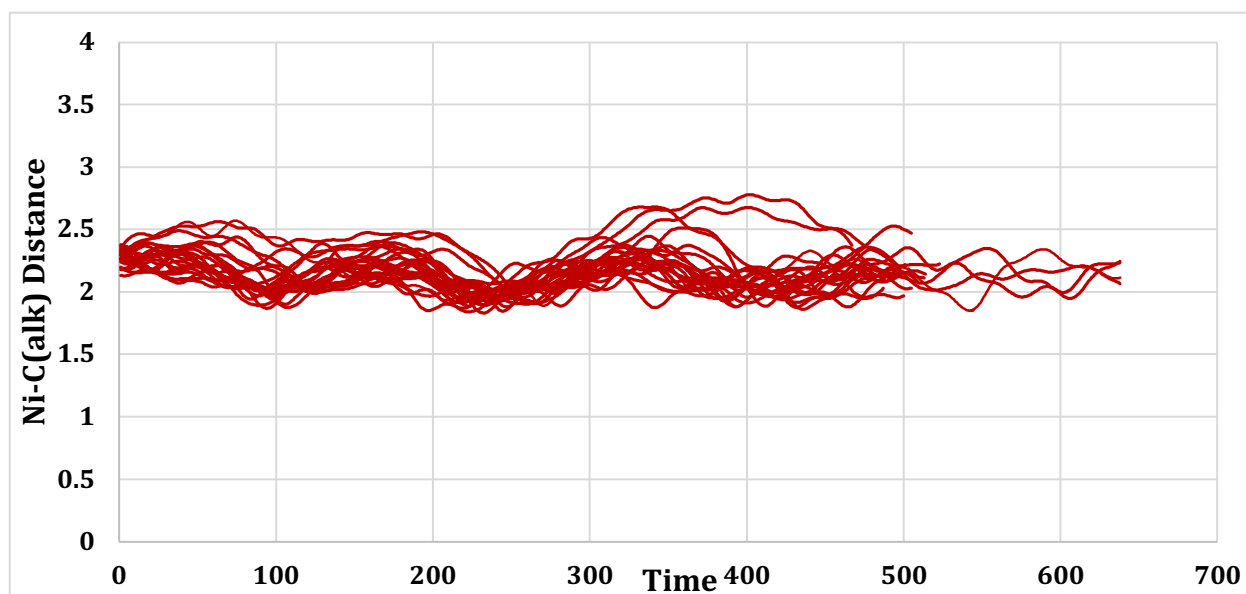

**Figure S8.** Time (fs) plot of trajectories versus Ni-C(alkyl radical) bond length (Å) of truncated system initiated at the reductive elimination transition state  ${}^2\mathbf{I}'\text{-TS}$  in the reverse direction.

The red lines represent the results of more than 20 trajectories (ran for 500 to 700 fs) obtained, all of which show that the Ni-C(alk) bond length lies in the range of 1.8 to 2.8 Å. These results suggest that after initiated in the reverse direction at  ${}^2\mathbf{I}'\text{-TS}$ , Ni(III) intermediate  ${}^2\mathbf{H}'$  was formed and maintained until the end of trajectory, without the observation of *tert*-butyl radical dissociating from Ni center and generating corresponding Ni(II) intermediate (as shown in Figure S7). Overall, the results of quasi-classical dynamic calculation is consistent with the proposed pathway that the dissociation of *tert*-butyl radical from Ni(III) intermediate  ${}^2\mathbf{H}'$  is uphill in energy. Also, the radical addition process of *tert*-butyl radical to Ni center occurs on *singlet spin tetrahedral* Ni species  ${}^1\mathbf{G}'$  or *triplet spin tetrahedral* Ni species  ${}^3\mathbf{G}$  rather than *singlet spin square planar* Ni species  ${}^1\mathbf{G}$ , because the former Ni(II) species is either higher in energy level ( ${}^1\mathbf{G}'$ ) than Ni(III) intermediate  ${}^2\mathbf{H}'$  while the latter Ni(II) is lower, and the dynamic simulations operate on single-spin state potential energy surface thus cannot reveal the performances of system when spin state is changed. The exploration in which intermediate does the alkyl radical add to is ongoing in our group.



|                     |                                                                                   | $\Delta E_{\text{activation}}$<br>(kcal/mol) | $\Delta E_{\text{distortion}}$<br>(kcal/mol) | $\Delta E_{\text{interaction}}$<br>(kcal/mol) |
|---------------------|-----------------------------------------------------------------------------------|----------------------------------------------|----------------------------------------------|-----------------------------------------------|
| <i>Outer-Sphere</i> | 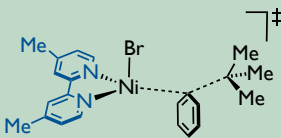 | <b>2I-TS</b> 15.0 (11.6) [18.3]              | 24.6 (24.8) [29.9]                           | -9.6 (-13.2) [-11.6]                          |
|                     |  | <b>4I-TS</b> 13.6 (7.1) [19.8]               | 27.6 (25.4) [33.1]                           | -14.0 (-18.3) [-13.3]                         |
| <i>Inner-Sphere</i> |  | <b>2I'-TS</b> -3.5 (-11.2) [-3.4]            | 37.1 (35.7) [42.6]                           | -40.6 (-46.9) [-46.0]                         |
| <i>Outer-Sphere</i> |  | <b>1C-TS</b> -14.5 (-11.1) [-18.2]           | 16.0 (16.4) [18.3]                           | -30.5 (-27.6) [-36.5]                         |
|                     |  | <b>3C-TS</b> -17.4 (-19.2) [-17.1]           | 17.4 (18.0) [19.8]                           | -34.8 (-37.2) [-36.9]                         |
| <i>Inner-Sphere</i> |  | <b>1C'-TS</b> -12.3 (-17.7) [-16.6]          | 18.6 (19.2) [19.6]                           | -30.9 (-36.9) [-36.2]                         |

**Table S1.** Activation Strain-Distortion/Interaction analysis of C(sp<sup>2</sup>)-C(sp<sup>3</sup>) bond formation step. Relative electronic energy values were computed with respect to separate corresponding phenyl-bromo-Ni-ligand species and *tert*-butyl radical at the UB3LYP-D3/def2-TZVPP-CPCM(THF)//UB3LYP-D3/def2-SVP-CPCM(THF), UB3LYP-D3/def2-SVP-CPCM(THF) (in parenthesis) and UM06/def2-TZVPP-CPCM(THF)//UB3LYP-D3/def2-SVP-CPCM(THF) (in bracket) levels of theory.

|                                                                                     | $\Delta G$ (kcal/mol; 298K)                                                         |                                                                                     | $\Delta E_{\text{activation}}$<br>(kcal/mol)                                        | $\Delta E_{\text{distortion}}$<br>(kcal/mol)                                                       | $\Delta E_{\text{interaction}}$<br>(kcal/mol) |                       |                       |
|-------------------------------------------------------------------------------------|-------------------------------------------------------------------------------------|-------------------------------------------------------------------------------------|-------------------------------------------------------------------------------------|----------------------------------------------------------------------------------------------------|-----------------------------------------------|-----------------------|-----------------------|
|  |  |  |  | <b>Ni-C(sp<sup>3</sup>) Bond<br/>Dissociation<br/>Energy (<math>\Delta E</math>;<br/>kcal/mol)</b> |                                               |                       |                       |
|  | 5.6 (-2.3) [9.7]                                                                    | 15.0 (7.4) [15.1]                                                                   | 12.8 (20.7) [8.7]                                                                   | -3.5 (-11.2) [-3.4]                                                                                | 37.1 (35.7) [42.6]                            | -40.6 (-46.9) [-46.0] |                       |
|  | 0.0 (0.0) [0.0]                                                                     | -2.3 (-10.0) [3.3]                                                                  | 4.2 (-3.8) [6.0]                                                                    | 20.1 (27.8) [14.5]                                                                                 | -13.2 (-21.2) [-11.4]                         | 33.6 (32.7) [53.4]    | -46.8 (-53.9) [-64.8] |
|  | -3.4 (-10.0) [0.5]                                                                  | 2.7 (-4.6) [3.8]                                                                    | 21.5 (28.1) [17.6]                                                                  | -14.6 (-22.0) [-13.6]                                                                              | 29.8 (28.1) [35.4]                            | -44.4 (-50.1) [-49.0] |                       |
|  | -3.3 (-11.6) [2.4]                                                                  | 7.3 (-0.2) [9.1]                                                                    | 19.2 (27.5) [13.5]                                                                  | -8.7 (-16.2) [-6.8]                                                                                | 28.2 (27.3) [48.0]                            | -36.9 (-43.5) [-54.8] |                       |

**Table S2.** Grey: calculated energetics on inner-sphere reductive elimination step with different alkyl radicals; Green: related analysis on bond dissociation energy of Ni(III) intermediate; Yellow: activation strain-distortion/interaction analysis on reductive elimination transition state (relative electronic energy values was calculated with respect to separate corresponding Ni(II) species and *tert*-butyl radical). All relative energy values were computed with respect to Ni(II) species at the UB3LYP-D3/def2-TZVPP-CPCM(THF)//UB3LYP-D3/def2-SVP-CPCM(THF), UB3LYP-D3/def2-SVP-CPCM(THF) (in parenthesis) and UM06/def2-TZVPP-CPCM(THF)//UB3LYP-D3/def2-SVP-CPCM(THF) (in bracket) levels of theory.

Method: UB3LYP-D3/def2-SVP-CPCM(THF)

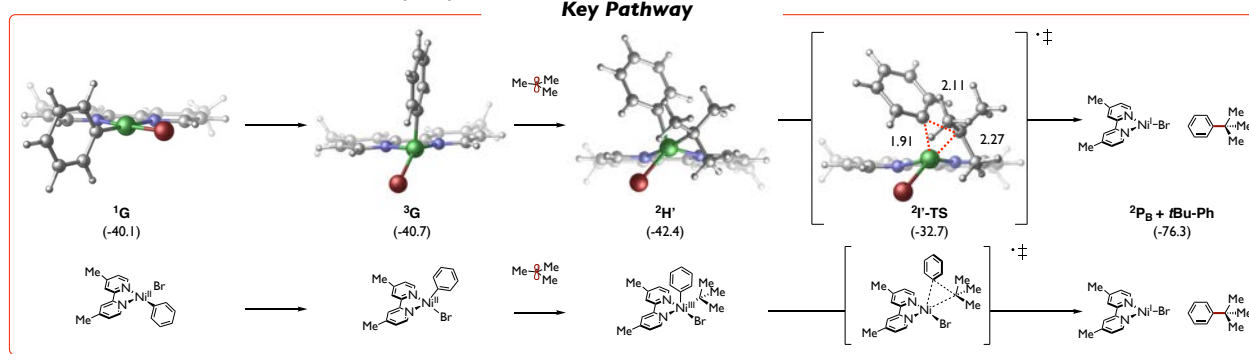

Method: UB3LYP-D3(BJ)/def2-SVP-CPCM(THF)

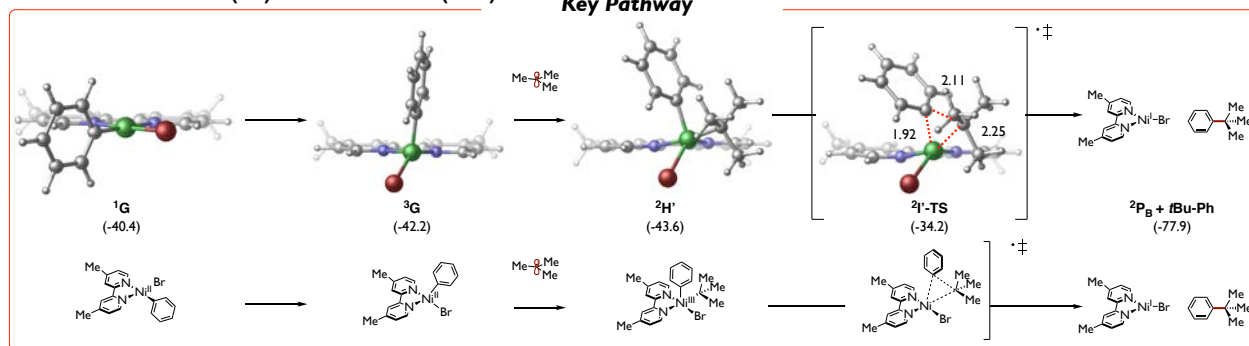

**Figure S9.** Comparison of key pathway in Ni-bipyridine system with original zero damping and Becke-Johnson damping of Grimme's dispersion correction. Relative Gibbs free energy values were computed at the UB3LYP-D3/def2-SVP-CPCM(THF) (in parenthesis) level of theory.

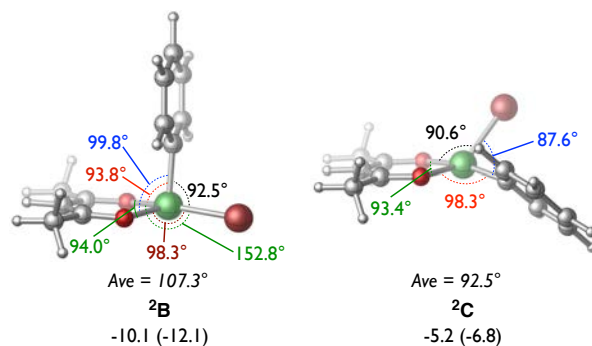

**Figure S10.** Structural parameters of  $^2B$  and  $^2C$ .

We have described “distorted tetrahedral” and “distorted square planar” as defined by the average angle deviations from a true tetrahedral geometry ( $109^\circ$ ) and square planar ( $90^\circ$ ).<sup>12</sup> As shown above, the average angle of the “distorted tetrahedral” structure  $^2B$  is  $107.3^\circ$  which is close to the angle of standard tetrahedral structure ( $109^\circ$ ). Also, the average angle of the “distorted square planar” structure  $^2C$  is  $92.5^\circ$  which is close to the angle of standard square planar structure ( $90^\circ$ ).

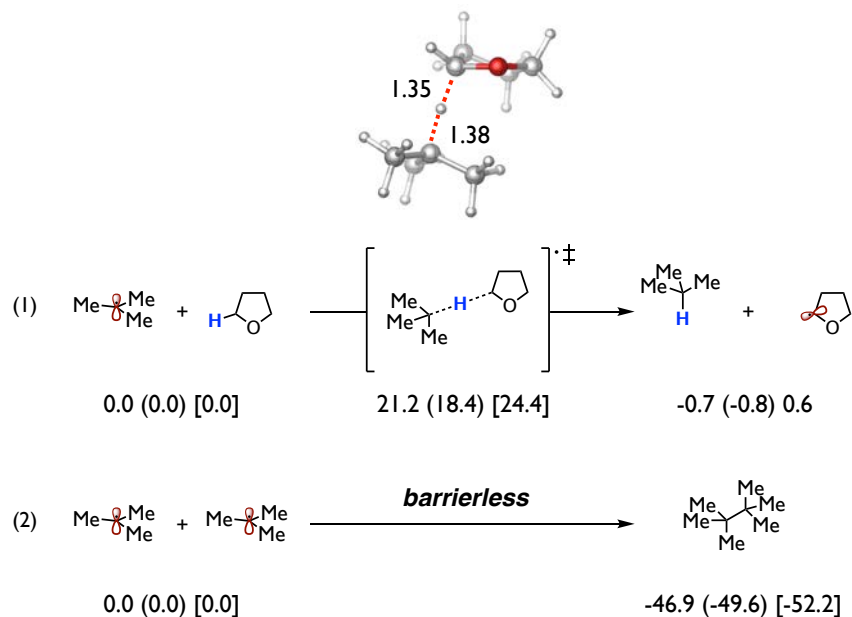

**Figure S11.** Calculated energetics of (1) HAT reaction between *tert*-butyl radical and THF, and (2) dimerization of two *tert*-butyl radicals. Relative Gibbs free energy values were computed at the UB3LYP-D3/def2-TZVPP-CPCM(THF)//UB3LYP-D3/def2-SVP-CPCM(THF), UB3LYP-D3/def2-SVP-CPCM(THF) (in parenthesis) and UM06/def2-TZVPP-CPCM(THF)//UB3LYP-D3/def2-SVP-CPCM(THF) (in bracket) levels of theory.

We computed the HAT pathways between the presumably formed *t*Bu radical and THF solvent (eq.1) and found that the HAT of *t*Bu• from THF is 0.7 kcal/mol downhill in energy with barrier of 21.1 kcal/mol. In comparison, the barrier of HAT of *t*Bu• from THF is only slightly higher than that of radical addition of *t*Bu• to Ni(II)(bpy) intermediate  $^1\mathbf{G}$  (17.3 kcal/mol at  $^2\mathbf{H-TS}$ ), thus HAT pathway is feasible and stays competitive to the radical addition pathway. This could explain the observed experimental results<sup>13</sup> that both Ar-H (3-15% yield) and THF-Ar were observed in the stoichiometric studies using (bpy)Ni(Ar)(Br) complex and *t*Bu-BF<sub>3</sub>K reagent. Moreover, we considered possible dimerization between two *tert*-butyl radicals (eq.2) and found that the dimerization process was barrierless based on relaxed potential energy surface scan on the newly formed C-C bond, resulting in the formation of 2,2,4,4-tetramethylbutane which is 46.9 kcal/mol downhill. This suggests that under higher concentration of *t*Bu radical, as expected, these radicals will likely lead to dimerization instead of undergoing radical addition to Ni(II) intermediate to generate Ni(III) intermediate, which is uphill in energy. Given the efficiency of the system, these calculations support low concentration of *t*Bu radical which lead to the desired cross-coupling product and only minor formation of side products such as HAT from solvent (due to higher barrier) or dimerization (due to low radical concentration).

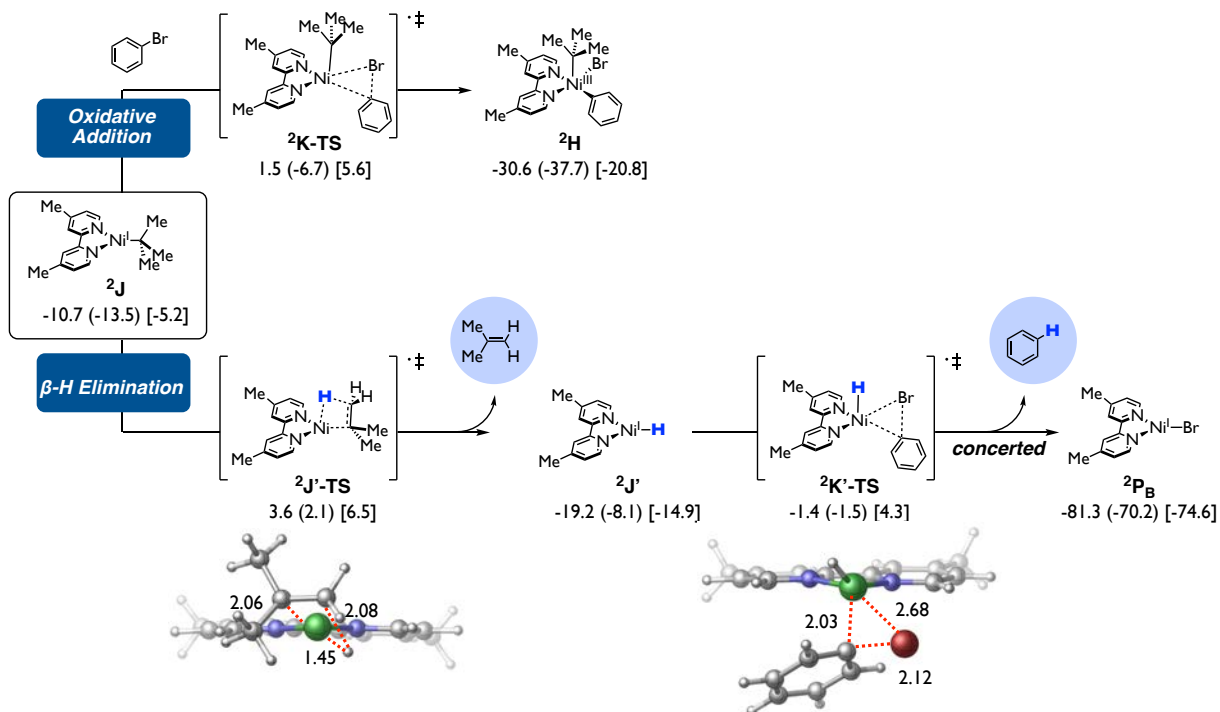

**Figure S12.** Calculated energetics of oxidative addition and  $\beta$ -H elimination pathways from Ni(I)-*t*Bu intermediate **2J**. Relative Gibbs free energy values were computed at the UB3LYP-D3/def2-TZVPP-CPCM(THF)//UB3LYP-D3/def2-SVP-CPCM(THF), UB3LYP-D3/def2-SVP-CPCM(THF) (in parenthesis) and UM06/def2-TZVPP-CPCM(THF)//UB3LYP-D3/def2-SVP-CPCM(THF) (in bracket) levels of theory.

We also performed calculation on possible  $\beta$ -H elimination pathways (*vide infra*) from (bpy)Ni(*t*Bu) intermediate **2J**, and found that oxidative addition to PhBr (via **2K-TS**, with barrier of 12.2 kcal/mol with respect to **2J**) is comparable with the  $\beta$ -H elimination pathway (via **2J'-TS**, with barrier of 14.3 kcal/mol). Moreover, since the difference between barrier of oxidative addition pathway (12.2 kcal/mol) and that of  $\beta$ -H elimination pathway (14.3 kcal/mol) is only 2.1 kcal/mol, the  $\beta$ -H elimination pathway from (bpy)Ni(*t*Bu) intermediate **2J** is a possible side reaction pathway in this reaction system leading to the generation of metal hydride species (bpy)Ni(H) and isobutylene as side products. Unfortunately, isobutylene has a low boiling point (-7.9 °C) and it is highly volatile thus challenging to assess experimentally. Nonetheless, the newly formed (bpy)Ni(H) species **2J'** can undergo oxidative addition with phenyl bromide (via **2K'-TS**), followed by concerted Ph-H bond formation (observed via intrinsic reaction coordinate at **2K'-TS**) to generate the experimentally observed side product *benzene* (Ph-H). Taken together, these computational and experimental results provide strong support for the formation of observed side products in experiment (i.e., THF-Ar adduct and Ar-H)<sup>13</sup> due to H atom transfer of *t*Bu radical from THF solvent followed by C-C bond formation and  $\beta$ -H elimination followed by Ar-H bond formation, respectively.

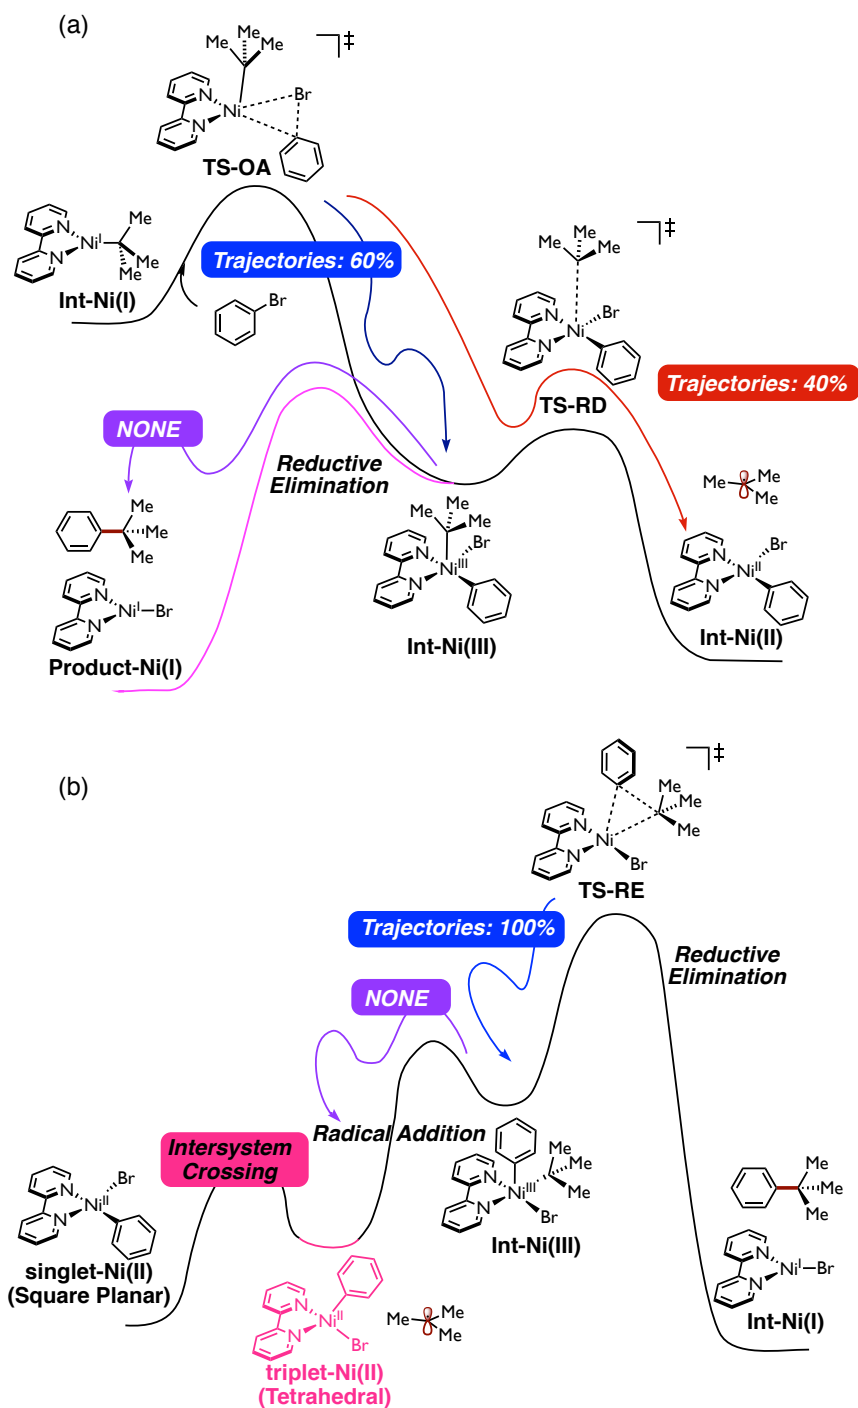

**Figure S13.** Preliminary results of quasi-classical dynamic simulations starting from (a)  $^2\text{K-TS}$  in forward direction and (b)  $^2\text{I}'\text{-TS}$  in reverse direction.

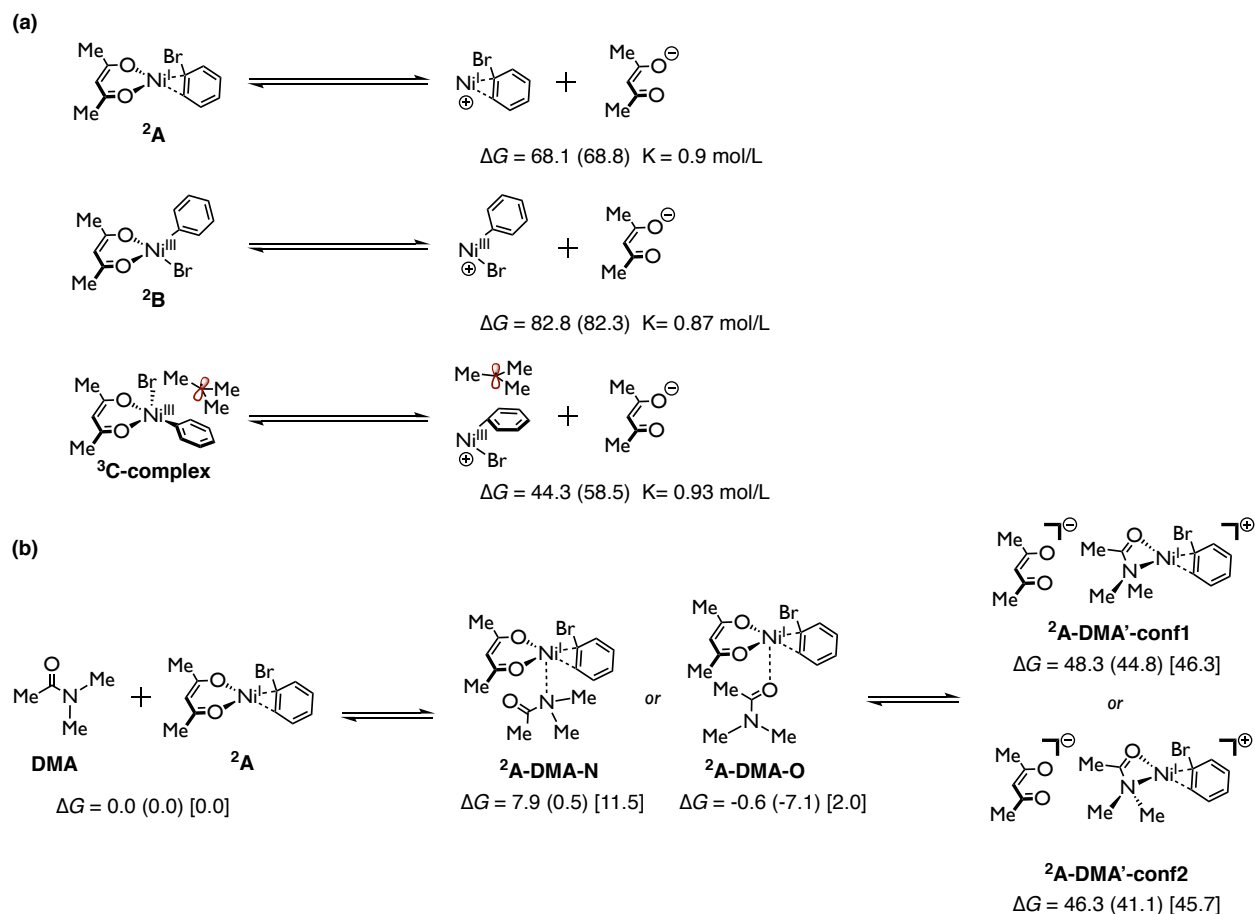

**Figure S14.** Calculated energetics of (a) ligand dissociation from key Ni(acac) species and (b) displacement and coordination of DMA solvent on key Ni(acac) species. Relative Gibbs free energy values were computed at the UB3LYP-D3/def2-TZVPP-CPCM(THF)//UB3LYP-D3/def2-SVP-CPCM(THF), UB3LYP-D3/def2-SVP-CPCM(THF) (in parenthesis) and UM06/def2-TZVPP-CPCM(THF)//UB3LYP-D3/def2-SVP-CPCM(THF) (in bracket) levels of theory.

To assess the likelihood of ligand dissociation, we have performed addition calculations to estimate the energy associated with ligand dissociation (shown above, Figure S14a), which showed there is an extremely energy uphill if the ligand dissociates from the Ni atom and the equilibrium constant for ligand dissociation is small. As a result, ligand dissociation pathways are unlikely. We also performed computations to gain insight at the propensity of DMA solvent to coordinate to the nickel active species and displace the acac (TMHD) ligand. As shown above (Figure S14b), the coordination of DMA to the nickel active species (prior to substrate activation) is energetically disfavored via N-mode coordination, but only weakly (dependent on the method) favorable via O-mode coordination. However, displacement of THMD ligand (here modeled as acac) is found highly unfavorable ( $> 40$  kcal/mol). Based on these results, TMHD ligand is likely to stay coordinated to the Ni center during the whole catalytic process, and the coordination of DMA solvent to Ni center is possible via O-mode but it could not displace TMHD ligand of key Ni catalytic species.

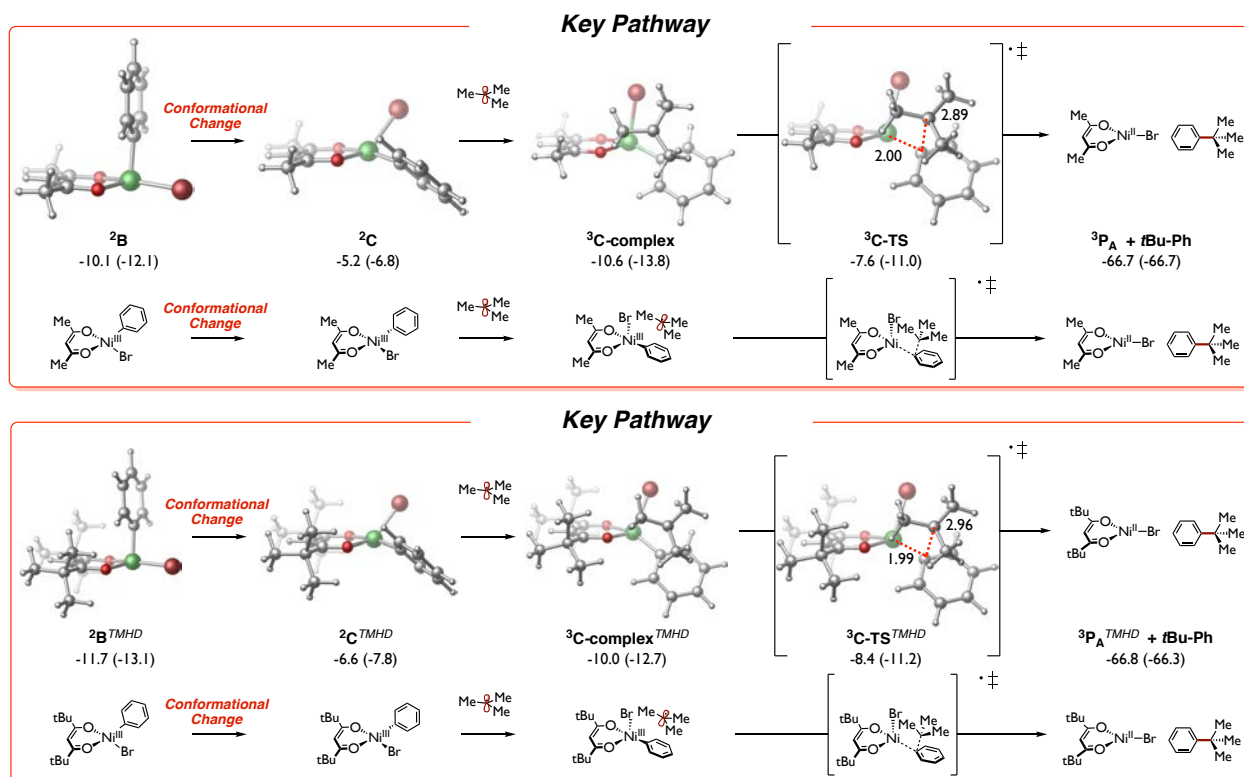

**Figure S15.** Comparison of energetics of the key pathways using truncated and full anionic TMHD as ligands. Relative Gibbs free energy values were computed at the UB3LYP-D3/def2-TZVPP-CPCM(THF)//UB3LYP-D3/def2-SVP-CPCM(THF) and UB3LYP-D3/def2-SVP-CPCM(THF) (in parenthesis) levels of theory.

We also computed the lowest energy pathway using the full TMHD ligand and found that the results of the full system are consistent with the pathway with truncated ligand (see below). Therefore, using acac ligand as computational model is a reasonable strategy.

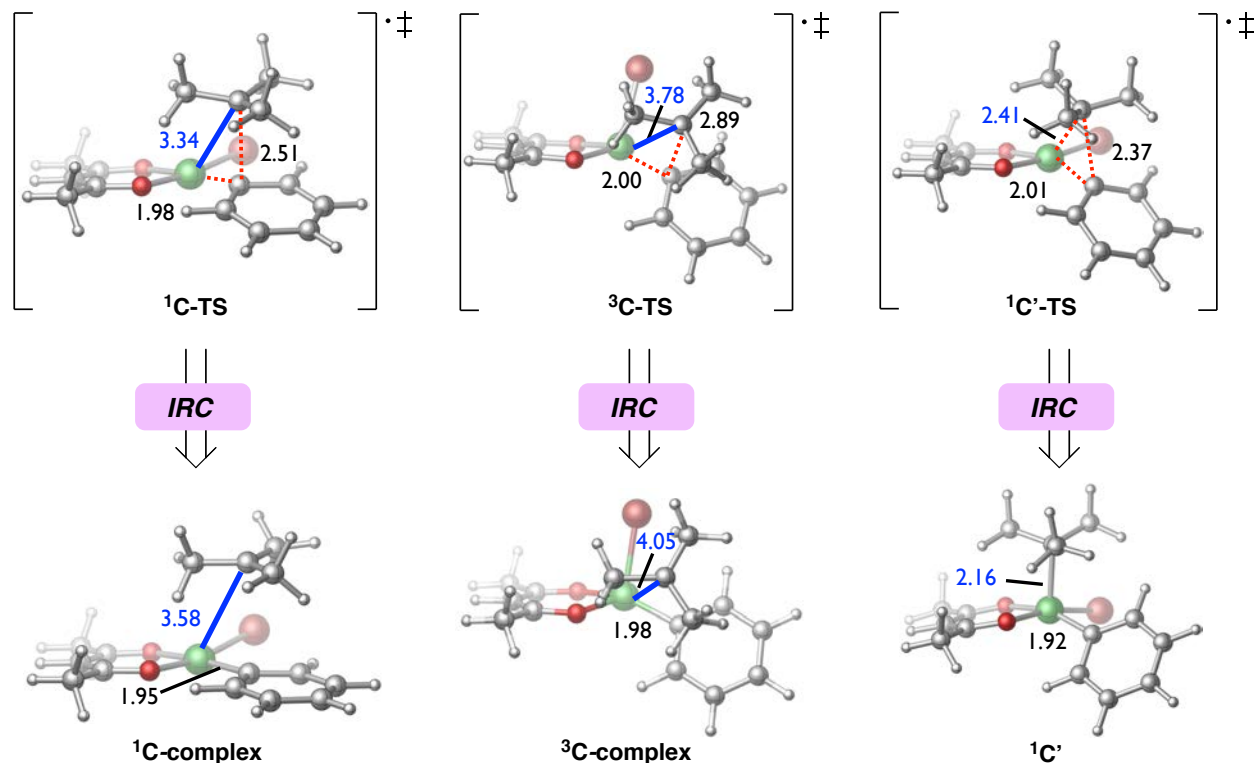

**Figure S16.** Comparison of three transition states of C-C formation in Ni(acac) system and their corresponding intermediates obtained from intrinsic reaction coordinate calculations (Unit: Å).

The distance between the *tert*-butyl and the Ni atom (in blue) in the *outer-sphere* transition states  ${}^1\text{C-TS}$  and  ${}^3\text{C-TS}$  are relative long (3.34 and 3.78 Å, respectively). Thus, based on these distances, there is no Ni-*tert*-butyl interaction in the *outer sphere* transition states. However, for the *inner-sphere* TS  ${}^1\text{C'-TS}$ , the Ni-*t*Bu distance is much shorter, 2.41 Å, than that in the *outer-sphere* transition states. Moreover, the intrinsic reaction coordinate calculations of  ${}^1\text{C-TS}$ ,  ${}^3\text{C-TS}$  and  ${}^1\text{C'-TS}$  showed that the *outer-sphere* transition states  ${}^1\text{C-TS}$  and  ${}^3\text{C-TS}$  lead to Ni•••*t*Bu radical complexes ( ${}^1\text{C-complex}$  and  ${}^3\text{C-complex}$ ) rather than Ni-alkyl intermediates ( ${}^1\text{C}'$ ) as determined by examining the corresponding distances between Ni-*t*Bu and the hybridization of the optimized intermediates (from the IRCs), respectively.



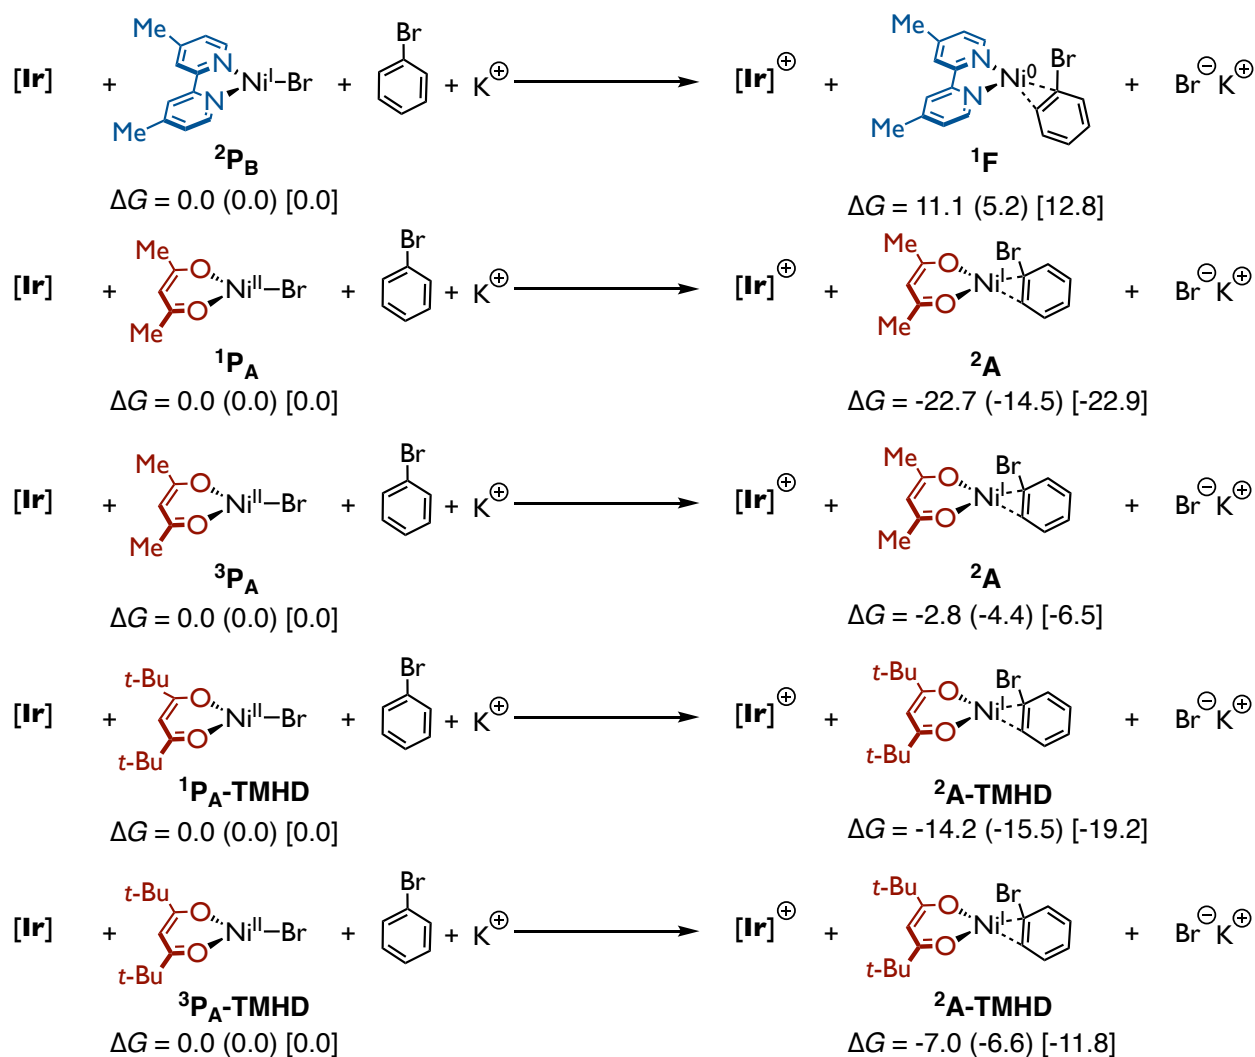

**Figure S17.** Calculation of single electron transfer steps between bromo Ni-ligand species and Ir photocatalyst to regenerate corresponding starting Ni species. Relative Gibbs free energy values were computed at the UB3LYP-D3/def2-TZVPP-CPCM(THF)//UB3LYP-D3/def2-SVP-CPCM(THF), UB3LYP-D3/def2-SVP-CPCM(THF) (in parenthesis) and UM06/def2-TZVPP-CPCM(THF)//UB3LYP-D3/def2-SVP-CPCM(THF) (in bracket) levels of theory.

Based on the calculated thermodynamic data of SET of bromo-Ni-ligand species with reduced Ir(II) photocatalyst, the single electron transfer steps should be not problematic. Specifically, for the Ni(bpy) system, while this process is slightly uphill in energy, based on free energy span model<sup>14</sup> the reaction can still progress with turnover of catalytic cycle since the following steps from Ni(0) **1F** have great thermodynamic drive with low barrier. As for Ni(acac) system, the SET steps between (acac)Ni-Br and photocatalyst are downhill in energy for both singlet and triplet spin states of (acac)Ni-Br, thus should be energetically feasible. Calculated results of full Ni-TMHD system are similar with those of the truncated Ni-acac system, both of which are downhill in energy. Therefore, in the absence of any direct experimental evidence (reduction potentials) for any of these mono-ligand bromo Ni

species to the best of our knowledge, computations predict that this step should not be problematic for both (acac)Ni(II)-Br and (bpy)Ni(I)-Br to retrieve (acac)Ni(I) complex **2A** and (bpy)Ni(0) complex **1F**, respectively.

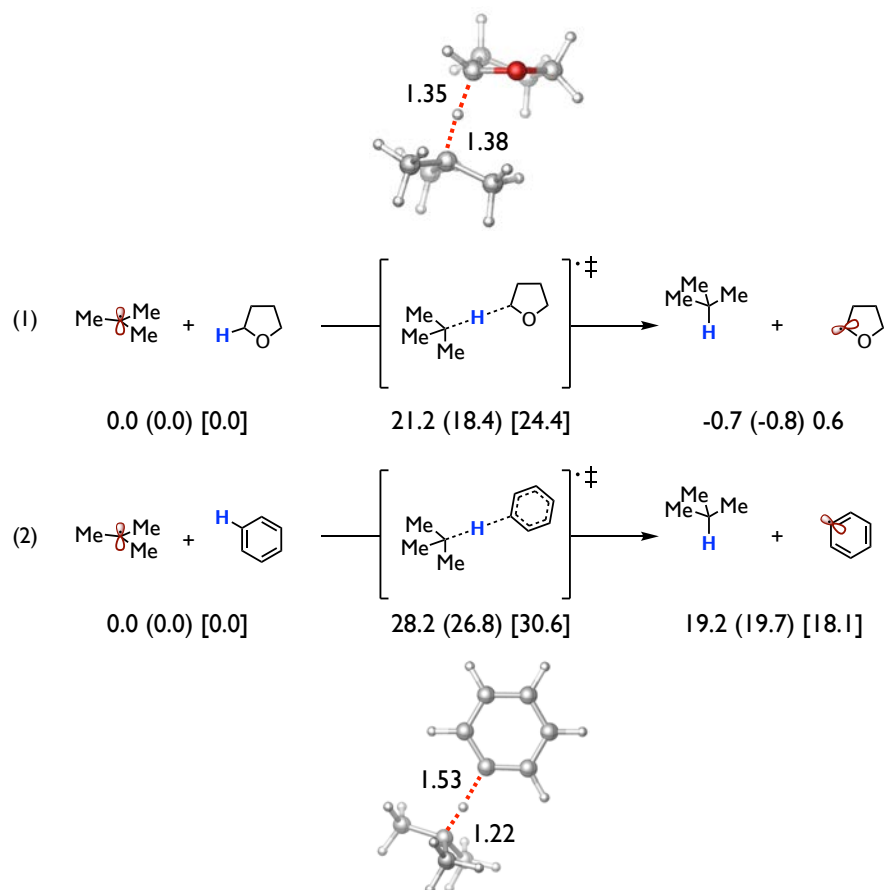

**Figure S18.** Calculated energetics of (1) HAT reaction between *tert*-butyl radical and THF, and (2) benzene. Relative Gibbs free energy values were computed at the UB3LYP-D3/def2-TZVPP-CPCM(THF)//UB3LYP-D3/def2-SVP-CPCM(THF), UB3LYP-D3/def2-SVP-CPCM(THF) (in parenthesis) and UM06/def2-TZVPP-CPCM(THF)//UB3LYP-D3/def2-SVP-CPCM(THF) (in bracket) levels of theory.

Calculations of HAT reactions between *tert*-butyl radical and different solvent molecules (i.e., THF and benzene) here were intended to show that the mechanism of this type of reaction might differ depending on the nature of solvent, electrophile, nucleophile even though the same *tert*-butyl radical was presumed to exist in the Ni-bipyridine system reported by Fu.<sup>15</sup>

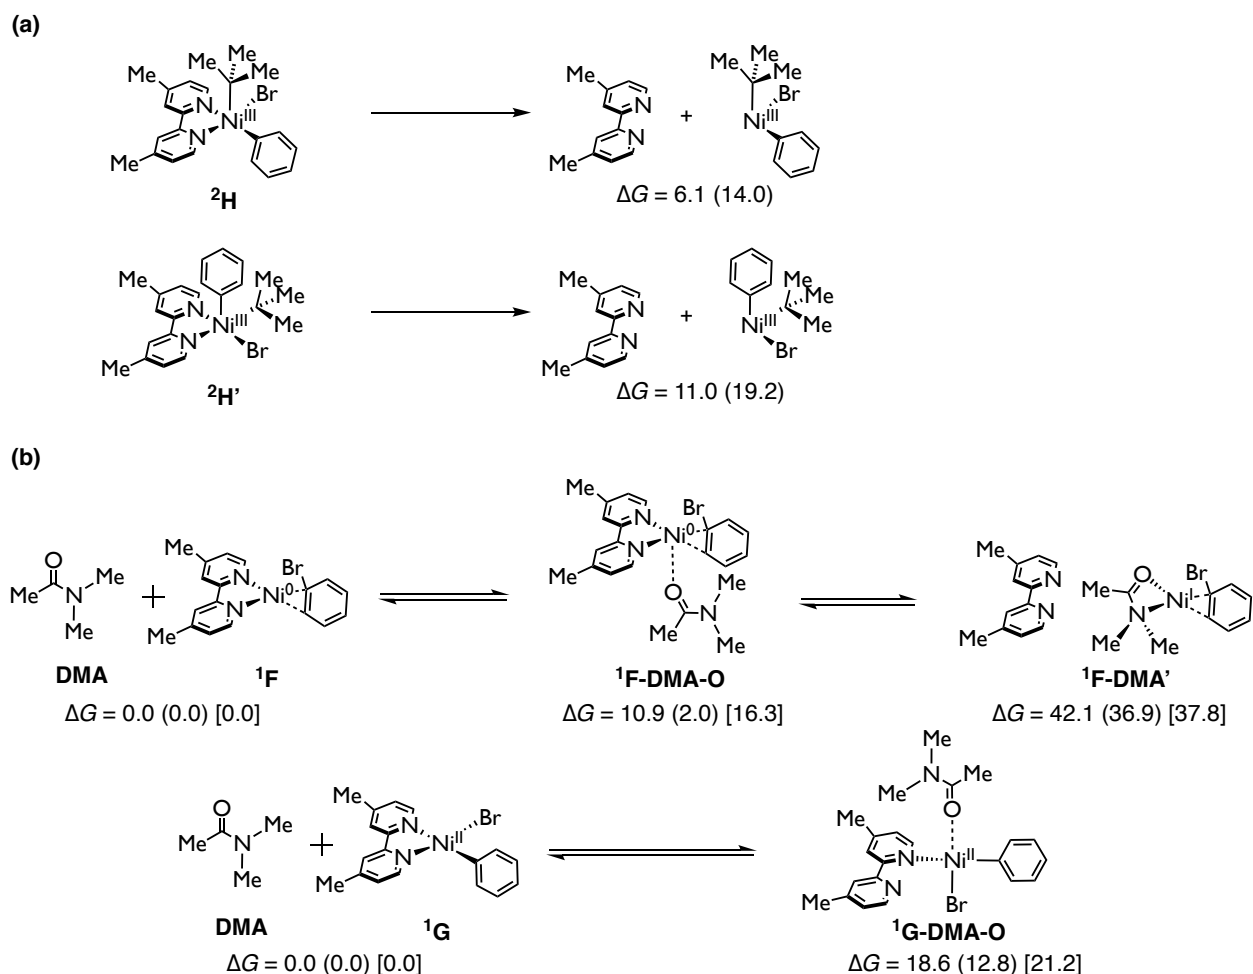

**Figure S19.** Energetics of (a) complete ligand dissociation from key Ni(III) intermediates  ${}^2\text{H}$  and  ${}^2\text{H}'$ , and (b) coordination and displacement with DMA solvent. Relative Gibbs free energy values were computed at the UB3LYP-D3/def2-TZVPP-CPCM(THF)//UB3LYP-D3/def2-SVP-CPCM(THF), UB3LYP-D3/def2-SVP-CPCM(THF) (in parenthesis) and UM06/def2-TZVPP-CPCM(THF)//UB3LYP-D3/def2-SVP-CPCM(THF) (in bracket) levels of theory.

These results show that complete ligand dissociation from Ni(III) intermediates is unlikely to occur since it's uphill in energy level from  ${}^2\text{H}$  and  ${}^2\text{H}'$  by 6.1 and 11.0 kcal/mol, respectively. Moreover, we explored the tendency of displacement or coordination with DMA solvent for the byp-nickel system, and found that DMA coordination to Ni(0) or Ni(II) is found energetically unfavorable ( ${}^1\text{F-DMA-O}$  and  ${}^1\text{G-DMA-O}$ ) and, like the TMHD ligand, highly unfavorable to cause the dissociation of bipyridine ligand ( ${}^1\text{F-DMA}'$ ).

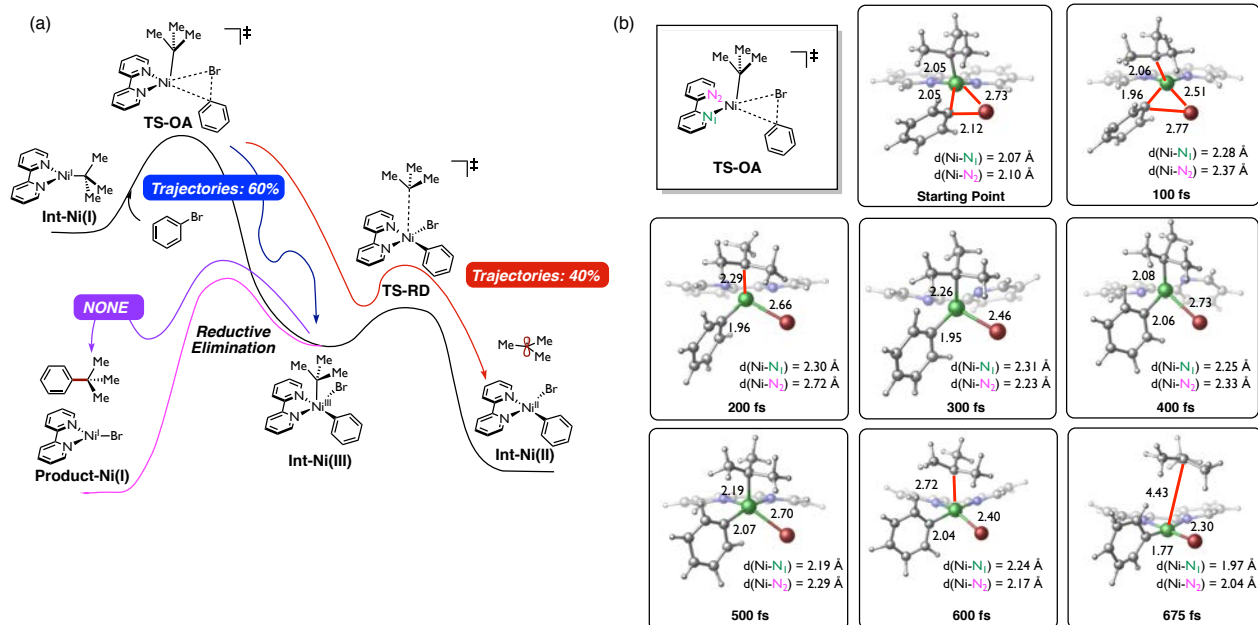

**Figure S20.** (a) Preliminary results of quasi-classical dynamic simulations starting from <sup>2</sup>K-TS in forward direction and (b) snapshots of one example trajectory undergoing radical dissociation.

To explore the likelihood of transient ligand dissociation during the reaction, we also performed quasi-classical dynamic calculations which allow us to “see” if ligand dissociation occurs, and if so, at what time step (Figure S20). Dynamic calculations starting from TS-Oxidative Addition from Ni(I) showed that complete ligand dissociation is unlikely to happen within the lifetime of Ni(III) intermediate. In addition, although transient decooordination of one of the pyridine ligands was observed during some simulated trajectories (see Figure S20(b) for an example trajectory), *the Ni(III) intermediate doesn't undergo any structural rearrangement*. Rather, Ni(III) intermediate either stayed the same conformation until the end of simulation (60% of trajectories) or underwent radical dissociation of *t*Bu radical from axial position of Ni center (40% of trajectories).

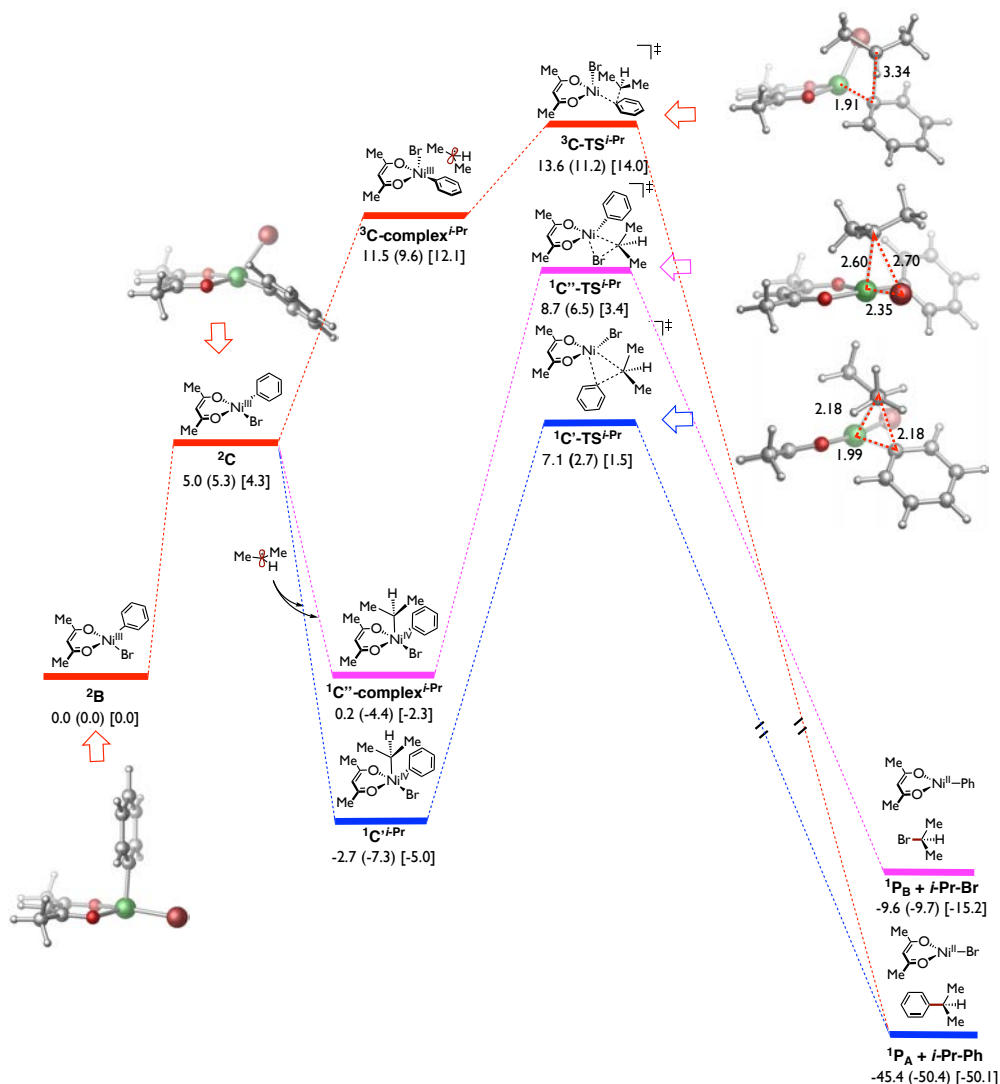

**Figure S21.** Calculated energetics of the Ni-catalyzed cross-coupling between *iso*-propyl radical and phenyl bromide using anionic acac as ligand. Free energies (kcal/mol) were computed at the UB3LYP-D3/def2-TZVPP-CPCM(DMA)//UB3LYP-D3/def2-SVP-CPCM(THF), UB3LYP-D3/def2-SVP-CPCM(THF) (in parenthesis) and UM06/def2-TZVPP-CPCM(DMA)//UB3LYP-D3/def2-SVP-CPCM(THF) (in bracket) levels of theory.

We performed computations to investigate the effect of secondary radical in the reaction pathway and found that the favored pathway is via inner-sphere C-C bond formation with overall barriers for C-C bond formation of  $\sim 9$  kcal/mol. Thus, the cross-coupling of secondary alkyl radical is also applicable in Ni-TMHD system, which is shown in the experiment results (see part D, Page S31). Presumably, the less sterically hindered secondary alkyl radical (in contrast to the tertiary alkyl radical) does not pay a penalty to form the LNi-alkyl-Ar-Br species and can quickly undergo inner sphere C-C bond formation. Thus, from these results, we hypothesize that for acac/TMHD-Ni systems, sterics more than electronics influence the nature of the C-C bond formation and whether inner- or outer-sphere C(sp<sup>2</sup>)-C(sp<sup>3</sup>) is operative.

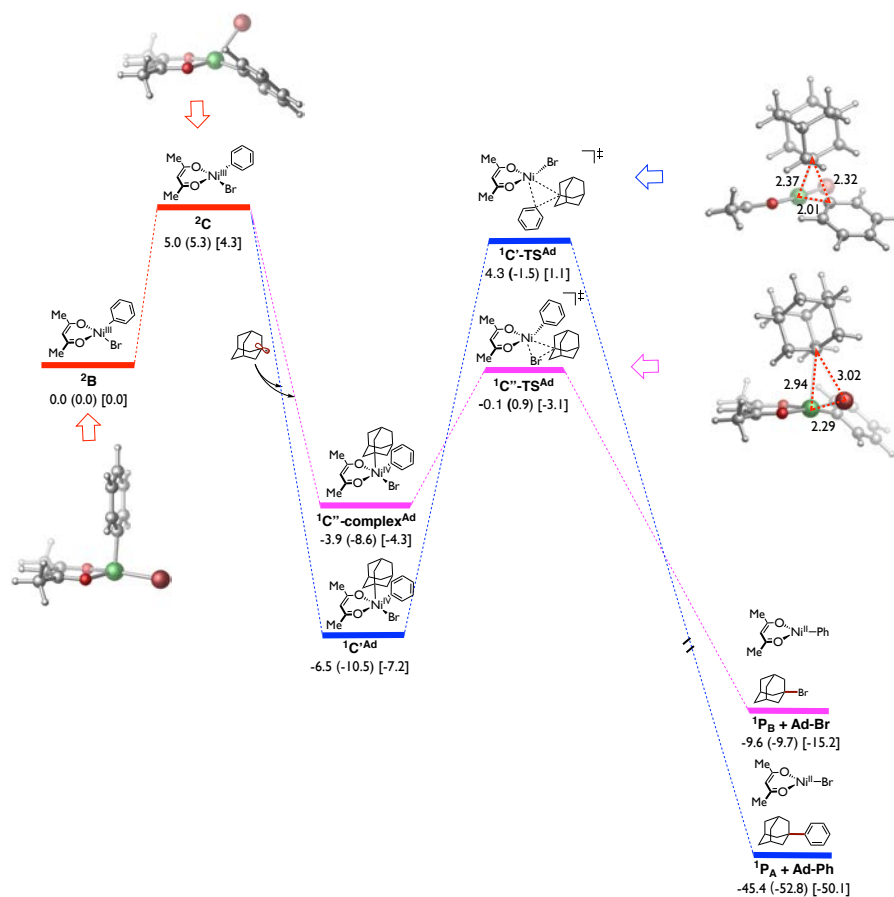

**Figure S22.** Calculated energetics of the Ni-catalyzed cross-coupling between adamantyl radical and phenyl bromide using anionic acac as ligand. Free energies (kcal/mol) were computed at the UB3LYP-D3/def2-TZVPP-CPCM(DMA)//UB3LYP-D3/def2-SVP-CPCM(THF), UB3LYP-D3/def2-SVP-CPCM(THF) (in parenthesis) and UM06/def2-TZVPP-CPCM(DMA)//UB3LYP-D3/def2-SVP-CPCM(THF) (in bracket) levels of theory.

We performed computations to investigate the effect of cyclic tertiary radical in the reaction pathway, showing that, if the cyclic radical were to engage with the nickel in the cross-coupling cycle, formation of 1-bromoadamantane via inner-sphere C-Br bond formation is favored over C-C bond formation. However, since this step is reversible with only 5.7 kcal/mol in thermodynamic drive with low barrier of 3.8 kcal/mol, the acac-Ni species is likely to also undergo other pathways in this system. Presumably, the sterically hindered cyclic adamantyl radical (compared with the acyclic tertiary radical and acyclic secondary radical) needs to pay a penalty to undergo inner-sphere C-C bond formation to form the desired product 1-phenyladamantane. As a result, we assume that sterics plays an important role in the C-C bond formation step and have a significant effect on the final product. Compared with the experimental results (see part D, Page S33) where no cross-coupling product was observed and aryl bromide was recovered, our calculations suggest that *if the aryl halide substrate were activated*, the reactions of adamantyl radical should be feasible to form many possible products, including 1-bromoadamantane and phenyladamantane. While regarding the failure of activating aryl bromide substrate in this system, more exploration of its properties in the Ni-TMHD system is ongoing in our group.

## D. Experimental Details

**General:** All chemical transformations were carried out under an inert atmosphere of argon unless otherwise noted. Standard Schlenk line techniques with a 4- or 5-port dual-bank manifold were used for the manipulation of solvents and reagents. LED irradiation was accomplished as described in our previous reports.<sup>16</sup> Reactions were monitored by GC/MS and <sup>1</sup>H NMR.

**Chemicals:** DMA was purchased as 99.9%, extra dry. K<sub>2</sub>HPO<sub>4</sub> and Na<sub>2</sub>CO<sub>3</sub> were stored and dispensed in a dry glovebox. Deuterated NMR solvents were purchased and stored over 4 Å molecular sieves. IrCl<sub>3</sub>·xH<sub>2</sub>O, and Ni(TMHD)<sub>2</sub> were purchased from commercial sources. The iridium photocatalyst Ir[dFCF<sub>3</sub>ppy]<sub>2</sub>(bpy)]PF<sub>6</sub> was prepared in-house by the procedure outlined in our previous publication.<sup>17</sup> Organotrifluoroborates were used as purchased without further purification.

### General Procedure I: Cross-Coupling of Secondary Trifluoroborates<sup>18</sup>

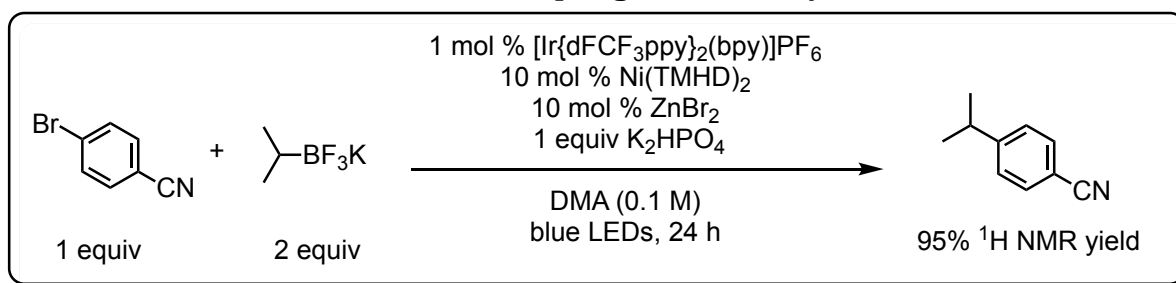

To an 8 mL reaction vial equipped with a Teflon-coated magnetic stir bar were added Ir[dFCF<sub>3</sub>ppy]<sub>2</sub>(bpy)]PF<sub>6</sub> (3.0 mg, 0.003 mmol, 1 mol %), isopropyltrifluoroborate (90 mg, 0.6 mmol, 2.0 equiv), and 4-bromobenzonitrile (55 mg, 0.3 mmol, 1.0 equiv). The vial was then transferred into a glove box where Ni(TMHD)<sub>2</sub> (12.8 mg, 0.03 mmol, 10 mol %), ZnBr<sub>2</sub> (6.8 mg, 0.03 mmol, 10 mol %), and anhydrous K<sub>2</sub>HPO<sub>4</sub> (52 mg, 0.3 mmol, 1.0 equiv) were added. The vial was then capped and removed from the glovebox. Anhydrous DMA (3 mL) was added to the vial via syringe under inert atmosphere. The vial was subsequently sparged with argon for 10 min. The vial was sealed with parafilm and stirred for 24 h approximately 1 cm away from a ring of blue LED lights strips (see below). A fan was used to maintain the reaction at temperature. After completion, the crude reaction mixture was diluted with ether, and <sup>1</sup>H NMR yield was determined using 1,3,5-trimethoxybenzene as internal standard (95% yield).

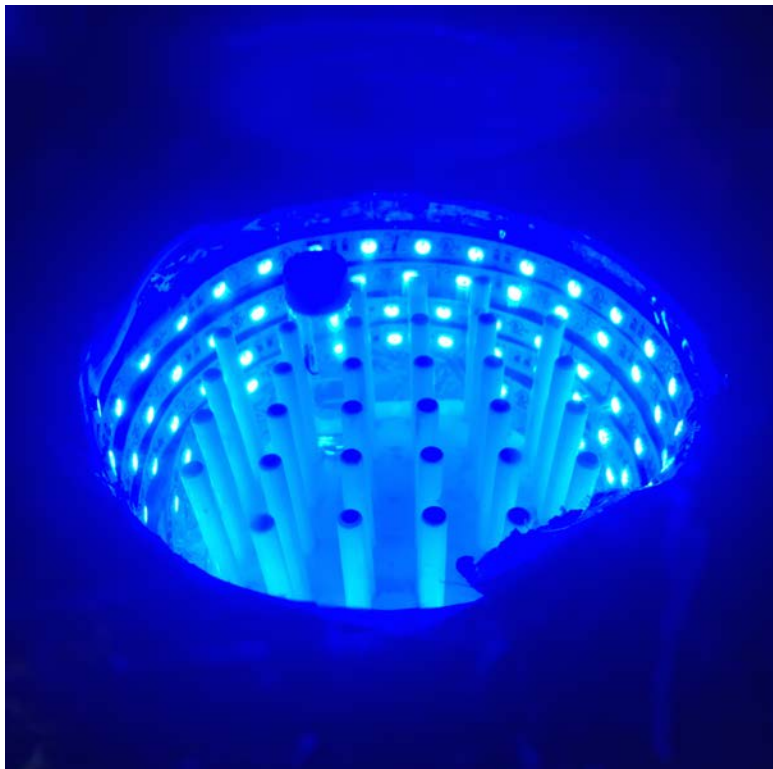

**Figure S23.** Reaction set-up using blue LEDs.

**General Procedure II: Cross-Coupling of Adamantyltrifluoroborate<sup>16a</sup>**

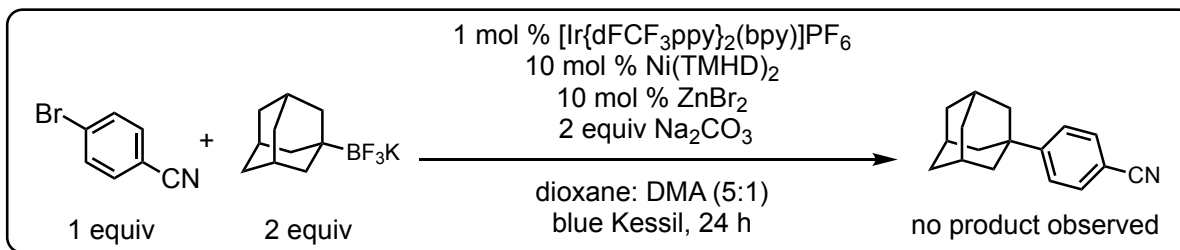

To an 8 mL reaction vial equipped with a Teflon-coated magnetic stir bar were added Ir[dFCF<sub>3</sub>ppy]<sub>2</sub>(bpy)]PF<sub>6</sub> (3.0 mg, 0.003 mmol, 1 mol %), adamantyltrifluoroborate (145 mg, 0.6 mmol, 2.0 equiv), and 4-bromobenzonitrile (55 mg, 0.3 mmol, 1.0 equiv). The vial was then transferred into a glove box where Ni(TMHD)<sub>2</sub> (12.8 mg, 0.03 mmol, 10 mol %), ZnBr<sub>2</sub> (6.8 mg, 0.03 mmol, 10 mol %), and anhydrous Na<sub>2</sub>CO<sub>3</sub> (64 mg, 0.6 mmol, 2.0 equiv) were added. A mixture of anhydrous DMA and dioxane (5:1, 3 mL) was then added to the vial via syringe under inert atmosphere. The vial was then capped, removed from the glovebox, and sealed with parafilm. The reaction was stirred for 24 h using blue Kessil lamps (see below). A fan was used to maintain the reaction around 40 °C. After completion, the crude reaction mixture was diluted with ether, and <sup>1</sup>H NMR yield was determined using 1,3,5-trimethoxybenzene as internal standard (no product observed, recovery of aryl bromide was detected).



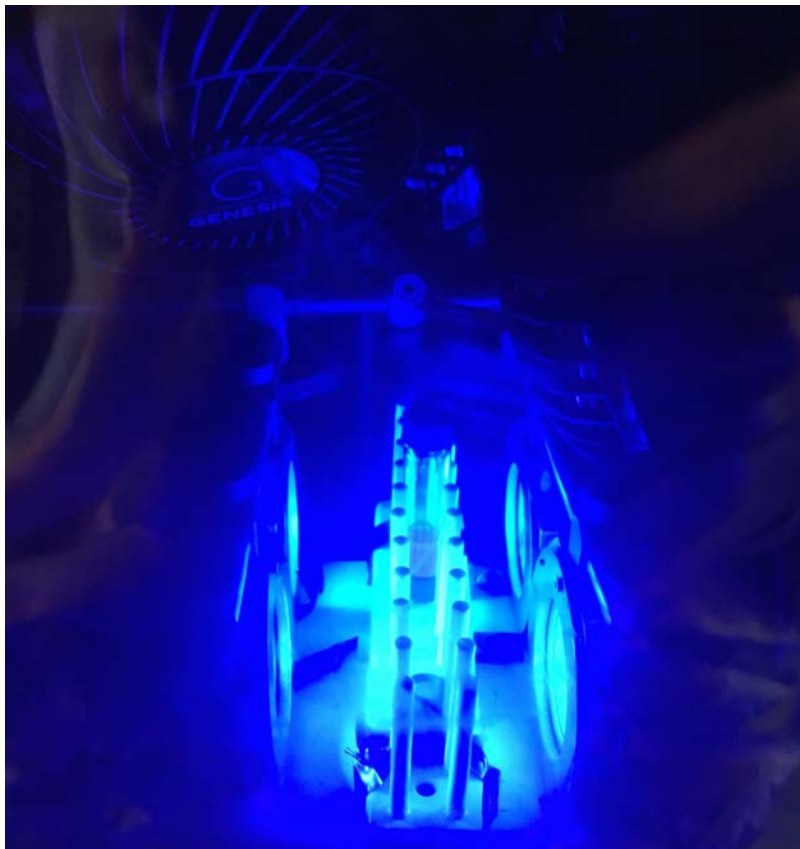

**Figure S24.** Reaction set-up using blue Kessil lamps.

## E. Coordinates and Energies of Optimized Structures in Computation

Figure S1

<sup>2</sup>A

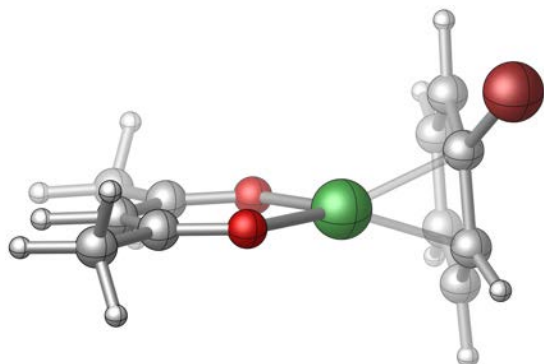

UB3LYP-D3/def2-SVP-CPCM(THF)

Zero-point correction= 0.202379 (Hartree/Particle)

Thermal correction to Energy= 0.219143

Thermal correction to Enthalpy= 0.220087

Thermal correction to Gibbs Free Energy= 0.154245

Sum of electronic and zero-point Energies= -4658.354829

Sum of electronic and thermal Energies= -4658.338065

Sum of electronic and thermal Enthalpies= -4658.337121

Sum of electronic and thermal Free Energies= -4658.402963

|    |             |             |             |
|----|-------------|-------------|-------------|
| C  | -2.53178800 | -0.43393100 | 1.44289900  |
| C  | -2.49128200 | -0.70770400 | 0.04310200  |
| C  | -2.82017300 | 0.30666700  | -0.89855000 |
| C  | -3.12620200 | 1.57753200  | -0.44707400 |
| C  | -3.16201600 | 1.86786400  | 0.93761200  |
| C  | -2.88072000 | 0.87951200  | 1.86361900  |
| Br | -2.54192800 | -2.55709300 | -0.56147600 |
| H  | -2.81567400 | 0.07267600  | -1.96415900 |
| H  | -2.52967100 | -1.25152100 | 2.17009600  |
| H  | -2.94103100 | 1.08783300  | 2.93438200  |
| H  | -3.42275400 | 2.87405900  | 1.27307400  |
| H  | -3.35065300 | 2.36310200  | -1.17251700 |
| Ni | -0.56734700 | -0.47208200 | 0.70356300  |
| O  | 1.21828000  | -1.16628900 | 0.90826800  |
| O  | 0.02037900  | 1.33193300  | 0.22988800  |
| C  | 1.23370500  | 1.69364400  | 0.14842900  |
| C  | 2.29158200  | -0.49781500 | 0.74328500  |
| C  | 3.57343000  | -1.27103100 | 0.96263700  |
| H  | 3.59819100  | -2.13082300 | 0.27315600  |
| H  | 4.47667500  | -0.66388700 | 0.81587100  |
| H  | 3.57522100  | -1.68356600 | 1.98485100  |
| C  | 1.45377000  | 3.14181900  | -0.23613100 |
| H  | 0.94702500  | 3.78917700  | 0.49802400  |
| H  | 2.51434800  | 3.42083000  | -0.29455600 |

H 0.97410500 3.33085400 -1.21040400  
C 2.35582500 0.86357500 0.38303500  
H 3.34439500 1.31082700 0.27594500  
 $\Delta G_{\text{solvation}}^{\text{UM06}} = -0.01015289$   
UB3LYP-D3/def2-TZVPP-CPCM(DMA)// UB3LYP-D3/def2-SVP-CPCM(THF)  
HF= -4659.7324910  
UM06/def2-TZVPP-CPCM(DMA)// UB3LYP-D3/def2-SVP-CPCM(THF)  
HF= -4659.08046134  
DLPNO-CCSD(T)/def2-TZVPP-gas// UB3LYP-D3/def2-SVP-CPCM(THF)  
HF= -4656.139208237236

<sup>2</sup>A'

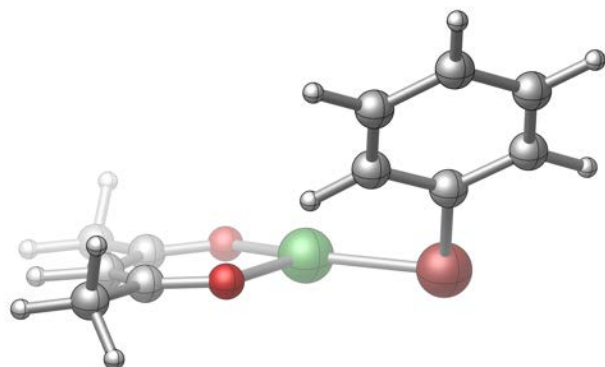

UB3LYP-D3/def2-SVP-CPCM(THF)

Zero-point correction= 0.202973 (Hartree/Particle)

Thermal correction to Energy= 0.219947

Thermal correction to Enthalpy= 0.220891

Thermal correction to Gibbs Free Energy= 0.153592

Sum of electronic and zero-point Energies= -4658.339107

Sum of electronic and thermal Energies= -4658.322134

Sum of electronic and thermal Enthalpies= -4658.321189

Sum of electronic and thermal Free Energies= -4658.388488

|    |             |             |             |
|----|-------------|-------------|-------------|
| C  | -2.39558900 | -1.29660400 | 1.46528600  |
| O  | -3.01344300 | -0.46132500 | 2.20271700  |
| C  | -2.62407300 | -1.50135300 | 0.08499500  |
| H  | -2.00279700 | -2.24497400 | -0.41559300 |
| C  | -3.57722900 | -0.82185700 | -0.70626700 |
| O  | -4.39832100 | 0.05707200  | -0.28385800 |
| C  | -3.65895500 | -1.12503700 | -2.18735400 |
| H  | -3.36882900 | -0.22458200 | -2.75493600 |
| H  | -3.01600500 | -1.96028300 | -2.49641100 |
| H  | -4.70403500 | -1.34785900 | -2.45572700 |
| C  | -1.33179000 | -2.11378000 | 2.16762300  |
| H  | -1.79735200 | -2.68589100 | 2.98713700  |
| H  | -0.80630300 | -2.80818600 | 1.49836800  |
| H  | -0.59918600 | -1.43325400 | 2.63169000  |
| Ni | -4.40417900 | 0.65782000  | 1.56899600  |
| C  | -5.84502100 | 3.55560900  | 0.40545300  |
| C  | -5.11523300 | 3.21248800  | -0.73216100 |
| C  | -6.31983600 | 4.84551300  | 0.63839800  |
| C  | -4.85440300 | 4.21613700  | -1.67210700 |
| H  | -4.76971000 | 2.18660000  | -0.87699500 |
| C  | -6.04643900 | 5.83341500  | -0.31547300 |
| H  | -6.88723200 | 5.08057900  | 1.54072600  |
| C  | -5.31538900 | 5.52154900  | -1.46676400 |
| H  | -4.28514800 | 3.96951900  | -2.57183700 |
| H  | -6.40818700 | 6.85128500  | -0.15063500 |
| H  | -5.10506800 | 6.29799200  | -2.20597100 |

Br            -6.22832200  2.16943000  1.71547300  
 $\Delta G_{\text{solvation}}^{\text{UM06}} = -0.01025185$   
UB3LYP-D3/def2-TZVPP-CPCM(DMA)// UB3LYP-D3/def2-SVP-CPCM(THF)  
HF= -4659.7317488  
UM06/def2-TZVPP-CPCM(DMA)// UB3LYP-D3/def2-SVP-CPCM(THF)  
HF= -4659.07809925  
DLPNO-CCSD(T)/def2-TZVPP-gas// UB3LYP-D3/def2-SVP-CPCM(THF)  
HF= -4656.147502274090

## <sup>2</sup>A-TS

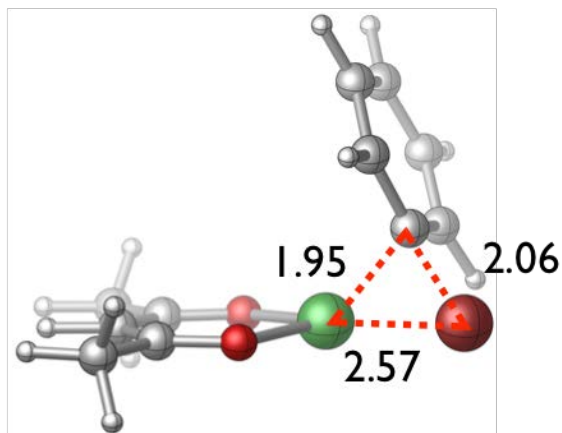

UB3LYP-D3/def2-SVP-CPCM(THF)

Zero-point correction= 0.201937 (Hartree/Particle)  
Thermal correction to Energy= 0.218204  
Thermal correction to Enthalpy= 0.219148  
Thermal correction to Gibbs Free Energy= 0.154635  
Sum of electronic and zero-point Energies= -4658.347249  
Sum of electronic and thermal Energies= -4658.330981  
Sum of electronic and thermal Enthalpies= -4658.330037  
Sum of electronic and thermal Free Energies= -4658.394550

|    |             |             |             |
|----|-------------|-------------|-------------|
| C  | -2.97553100 | 0.34941000  | 1.52032600  |
| C  | -2.28096300 | -0.59136300 | 0.72958800  |
| C  | -2.22260500 | -0.47104200 | -0.67640700 |
| C  | -2.76148000 | 0.66671600  | -1.26751200 |
| C  | -3.39786600 | 1.65092700  | -0.48816400 |
| C  | -3.50377600 | 1.48785900  | 0.89375700  |
| Br | -1.98440100 | -2.44446100 | 1.57505900  |
| H  | -1.71192700 | -1.23486700 | -1.26342300 |
| H  | -3.09258000 | 0.19415400  | 2.59402000  |
| H  | -4.01492600 | 2.23971400  | 1.50025600  |
| H  | -3.82107400 | 2.53564400  | -0.96881000 |
| H  | -2.68434600 | 0.79329200  | -2.35040300 |
| Ni | -0.52357700 | -0.33275800 | 1.52376600  |
| O  | 1.01536800  | -1.09755800 | 0.59651700  |
| O  | 0.21836200  | 1.44706400  | 1.68152500  |
| C  | 1.32888400  | 1.80411800  | 1.16900400  |
| C  | 2.01888200  | -0.41530700 | 0.21813600  |
| C  | 3.08153200  | -1.19043800 | -0.53120500 |
| H  | 2.61808300  | -1.68999300 | -1.39733500 |
| H  | 3.91530000  | -0.56422100 | -0.87564500 |
| H  | 3.47357700  | -1.98682000 | 0.12262600  |
| C  | 1.69846700  | 3.25582900  | 1.38174300  |
| H  | 1.77581900  | 3.45268200  | 2.46373500  |
| H  | 2.64190000  | 3.53881800  | 0.89617300  |

H 0.88502700 3.89360000 0.99959700  
C 2.20761400 0.96722700 0.44827700  
H 3.12192600 1.41793300 0.06166900  
 $\Delta G_{\text{solvation}}^{\text{UM06}} = -0.01048663$   
UB3LYP-D3/def2-TZVPP-CPCM(DMA)// UB3LYP-D3/def2-SVP-CPCM(THF)  
HF= -4659.7254964  
UM06/def2-TZVPP-CPCM(DMA)// UB3LYP-D3/def2-SVP-CPCM(THF)  
HF= -4659.07173765  
DLPNO-CCSD(T)/def2-TZVPP-gas// UB3LYP-D3/def2-SVP-CPCM(THF)  
HF= -4656.13047753174

## $^2A'$ -TS

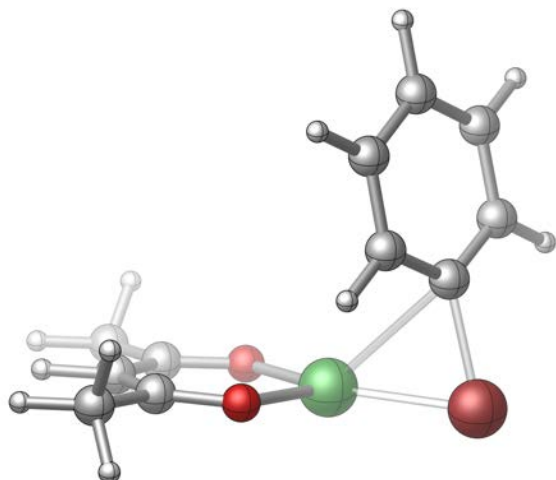

UB3LYP-D3/def2-SVP-CPCM(THF)

Zero-point correction= 0.202302 (Hartree/Particle)

Thermal correction to Energy= 0.218638

Thermal correction to Enthalpy= 0.219582

Thermal correction to Gibbs Free Energy= 0.154463

Sum of electronic and zero-point Energies= -4658.336430

Sum of electronic and thermal Energies= -4658.320094

Sum of electronic and thermal Enthalpies= -4658.319150

Sum of electronic and thermal Free Energies= -4658.384269

|    |             |             |             |
|----|-------------|-------------|-------------|
| C  | -2.66543400 | -0.54021800 | 1.31203400  |
| O  | -3.54977000 | 0.16165100  | 1.90193600  |
| C  | -2.75745500 | -1.04436600 | -0.00579100 |
| H  | -1.90838400 | -1.62150400 | -0.37388500 |
| C  | -3.85190100 | -0.88199200 | -0.88726100 |
| O  | -4.92957500 | -0.25548300 | -0.62718400 |
| C  | -3.77392900 | -1.48775300 | -2.27347800 |
| H  | -3.80891100 | -0.67890700 | -3.02257300 |
| H  | -2.86623300 | -2.08441200 | -2.43690400 |
| H  | -4.66111800 | -2.11855300 | -2.44475900 |
| C  | -1.42598100 | -0.83438100 | 2.13127200  |
| H  | -1.71780700 | -1.37441000 | 3.04723200  |
| H  | -0.67674900 | -1.42635100 | 1.58862700  |
| H  | -0.97157900 | 0.11643800  | 2.45493400  |
| Ni | -5.19980300 | 0.62850900  | 1.07948300  |
| C  | -6.10163200 | 2.98309900  | 0.22911100  |
| C  | -5.54528100 | 2.78780600  | -1.03909300 |
| C  | -5.83997500 | 4.12340300  | 0.99130100  |
| C  | -4.67424300 | 3.75969200  | -1.53660500 |
| H  | -5.75086700 | 1.87337400  | -1.59511700 |
| C  | -4.96455900 | 5.08430900  | 0.47191200  |
| H  | -6.29762700 | 4.25476200  | 1.97282800  |



|    |             |            |             |
|----|-------------|------------|-------------|
| C  | -4.38118000 | 4.90613300 | -0.78654100 |
| H  | -4.21726900 | 3.61269900 | -2.51828900 |
| H  | -4.74398900 | 5.97824200 | 1.06040800  |
| H  | -3.69838300 | 5.66021300 | -1.18447700 |
| Br | -7.38844100 | 1.67802400 | 0.90565300  |

$\Delta G_{\text{solvation}}^{\text{UM06}} = -0.01078544$   
UB3LYP-D3/def2-TZVPP-CPCM(DMA)// UB3LYP-D3/def2-SVP-CPCM(THF)  
HF= -4659.7247785  
UM06/def2-TZVPP-CPCM(DMA)// UB3LYP-D3/def2-SVP-CPCM(THF)  
HF= -4659.07196787  
DLPNO-CCSD(T)/def2-TZVPP-gas// UB3LYP-D3/def2-SVP-CPCM(THF)  
HF= -4656.14180760118

2B

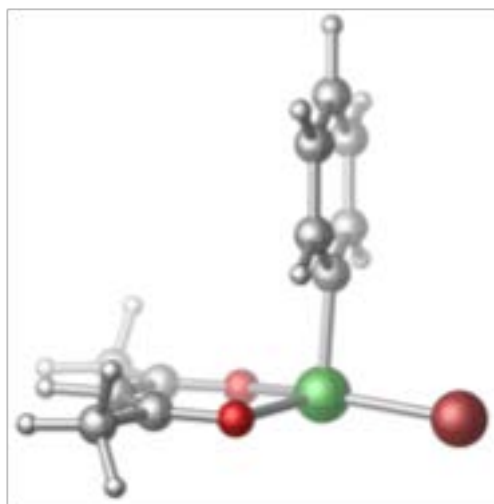

UB3LYP-D3/def2-SVP-CPCM(THF)

Zero-point correction= 0.202983 (Hartree/Particle)

Thermal correction to Energy= 0.219779

Thermal correction to Enthalpy= 0.220724

Thermal correction to Gibbs Free Energy= 0.154827

Sum of electronic and zero-point Energies= -4658.374184

Sum of electronic and thermal Energies= -4658.357387

Sum of electronic and thermal Enthalpies= -4658.356443

Sum of electronic and thermal Free Energies= -4658.422339

|    |             |             |             |
|----|-------------|-------------|-------------|
| C  | -3.02059400 | -0.20232900 | 1.26979400  |
| O  | -4.07185600 | 0.32063600  | 1.77961800  |
| C  | -2.95186100 | -0.78793100 | -0.00600300 |
| H  | -1.99375400 | -1.19622900 | -0.32547500 |
| C  | -4.04737800 | -0.91164300 | -0.88740700 |
| O  | -5.22036900 | -0.47009500 | -0.65790600 |
| C  | -3.86952100 | -1.60621900 | -2.21422100 |
| H  | -4.05556200 | -0.87921700 | -3.02177500 |
| H  | -2.86939100 | -2.04016200 | -2.34084500 |
| H  | -4.63093300 | -2.39592900 | -2.31225800 |
| C  | -1.80066000 | -0.15896100 | 2.15343300  |
| H  | -2.04085200 | -0.61999500 | 3.12457700  |
| H  | -0.93424800 | -0.66604800 | 1.71000300  |
| H  | -1.54579800 | 0.89479300  | 2.35266900  |
| Ni | -5.71248500 | 0.61864700  | 0.87298400  |
| C  | -5.19472900 | 2.32978100  | 0.23203000  |
| C  | -5.19034500 | 2.57300000  | -1.13601600 |
| C  | -4.75413100 | 3.25115500  | 1.17378500  |
| C  | -4.69931500 | 3.80998800  | -1.57972800 |
| H  | -5.55481400 | 1.82299900  | -1.83842000 |
| C  | -4.26938600 | 4.48369700  | 0.71022200  |
| H  | -4.76930400 | 3.02260600  | 2.24103100  |

|    |             |            |             |
|----|-------------|------------|-------------|
| C  | -4.24174700 | 4.76093100 | -0.66091600 |
| H  | -4.68212400 | 4.02467100 | -2.65162900 |
| H  | -3.91042100 | 5.22314300 | 1.43107900  |
| H  | -3.86301800 | 5.72289400 | -1.01479200 |
| Br | -7.96348000 | 1.16584000 | 0.81094000  |

$\Delta G_{\text{solvation}}^{\text{UM06}} = -0.01656274$   
UB3LYP-D3/def2-TZVPP-CPCM(THF)// UB3LYP-D3/def2-SVP-CPCM(THF)  
HF= -4659.7503056  
UM06/def2-TZVPP-CPCM(THF)// UB3LYP-D3/def2-SVP-CPCM(THF)  
HF= -4659.08182533  
DLPNO-CCSD(T)/def2-TZVPP-gas// UB3LYP-D3/def2-SVP-CPCM(THF)  
HF= -4656.15666595836

4B

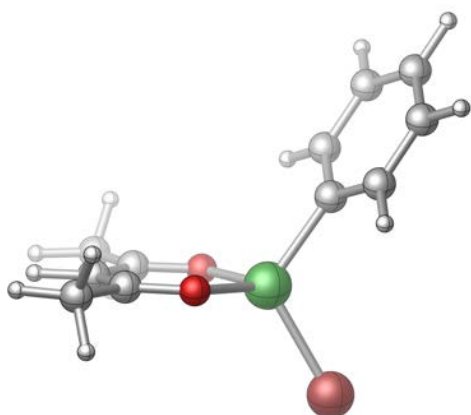

UB3LYP-D3/def2-SVP-CPCM(THF)

Zero-point correction= 0.202208 (Hartree/Particle)

Thermal correction to Energy= 0.219348

Thermal correction to Enthalpy= 0.220292

Thermal correction to Gibbs Free Energy= 0.151895

Sum of electronic and zero-point Energies= -4658.348616

Sum of electronic and thermal Energies= -4658.331476

Sum of electronic and thermal Enthalpies= -4658.330532

Sum of electronic and thermal Free Energies= -4658.398929

|    |             |             |             |
|----|-------------|-------------|-------------|
| C  | -2.53491700 | -0.04438600 | 0.44720700  |
| O  | -3.45994600 | 0.83791000  | 0.44218300  |
| C  | -2.67146600 | -1.36031800 | -0.03946100 |
| H  | -1.80695100 | -2.01811300 | 0.03895100  |
| C  | -3.83428900 | -1.88275600 | -0.63716800 |
| O  | -4.92384800 | -1.23471600 | -0.81410200 |
| C  | -3.86040600 | -3.30632900 | -1.12795900 |
| H  | -2.89759000 | -3.81763200 | -1.00407400 |
| H  | -4.64043000 | -3.85609300 | -0.57657600 |
| H  | -4.15140600 | -3.31515500 | -2.19015100 |
| C  | -1.21873800 | 0.41733700  | 1.01577600  |
| H  | -1.38537500 | 0.82720900  | 2.02416700  |
| H  | -0.46996900 | -0.38341500 | 1.05983800  |
| H  | -0.83424800 | 1.24120400  | 0.39257500  |
| Ni | -5.22881600 | 0.54852000  | -0.23443600 |
| C  | -5.46095600 | 1.86181000  | -1.72835600 |
| C  | -6.55428600 | 1.78500400  | -2.59514300 |
| C  | -4.48140700 | 2.84937200  | -1.87097100 |
| C  | -6.66247600 | 2.71521700  | -3.63763400 |
| H  | -7.32014100 | 1.01517300  | -2.46594800 |
| C  | -4.59858000 | 3.77508300  | -2.91779300 |
| H  | -3.63388100 | 2.89464700  | -1.18267100 |
| C  | -5.68550100 | 3.70639500  | -3.79706900 |
| H  | -7.51247100 | 2.66496400  | -4.32370400 |

H -3.83656200 4.54916800 -3.04445300  
H -5.77334100 4.43004600 -4.61156800  
Br -6.84790200 0.65981100 1.44015000  
 $\Delta G_{\text{solvation}}^{\text{UM06}} = -0.01265173$   
UB3LYP-D3/def2-TZVPP-CPCM(DMA)// UB3LYP-D3/def2-SVP-CPCM(THF)  
HF= -4659.7252207  
UM06/def2-TZVPP-CPCM(DMA)// UB3LYP-D3/def2-SVP-CPCM(THF)  
HF= -4659.05442964  
DLPNO-CCSD(T)/def2-TZVPP-gas// UB3LYP-D3/def2-SVP-CPCM(THF)  
HF= -4656.12009381385

<sup>2</sup>C

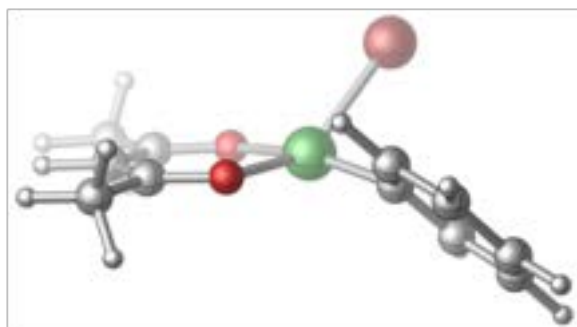

UB3LYP-D3/def2-SVP-CPCM(THF)

Zero-point correction= 0.203033 (Hartree/Particle)  
Thermal correction to Energy= 0.219788  
Thermal correction to Enthalpy= 0.220732  
Thermal correction to Gibbs Free Energy= 0.154904  
Sum of electronic and zero-point Energies= -4658.365732  
Sum of electronic and thermal Energies= -4658.348977  
Sum of electronic and thermal Enthalpies= -4658.348033  
Sum of electronic and thermal Free Energies= -4658.413861

|    |             |             |             |
|----|-------------|-------------|-------------|
| C  | -3.04514500 | -1.46216400 | -1.03628300 |
| O  | -3.57397700 | -0.29461400 | -1.12691700 |
| C  | -3.74079000 | -2.67377400 | -0.94109100 |
| H  | -3.15807600 | -3.59216900 | -0.88087600 |
| C  | -5.15014200 | -2.77270900 | -0.87397300 |
| O  | -5.94095200 | -1.78133000 | -0.92750100 |
| C  | -5.80154400 | -4.12411100 | -0.71697400 |
| H  | -6.48528600 | -4.29041600 | -1.56490200 |
| H  | -5.07672100 | -4.94657800 | -0.66475800 |
| H  | -6.41865100 | -4.12034900 | 0.19580100  |
| C  | -1.53706500 | -1.45059300 | -1.03019100 |
| H  | -1.10420300 | -2.45547900 | -0.94566500 |
| H  | -1.17843300 | -0.97177500 | -1.95544400 |
| H  | -1.18747700 | -0.82794600 | -0.19108900 |
| Ni | -5.43346800 | 0.08164600  | -1.20696600 |
| C  | -5.08026700 | 1.95510000  | -1.05476400 |
| C  | -3.99209900 | 2.54261800  | -1.69347000 |
| C  | -5.86831600 | 2.65173300  | -0.14046100 |
| C  | -3.66331500 | 3.86730200  | -1.37849400 |
| H  | -3.39494400 | 1.96999400  | -2.40527500 |
| C  | -5.52134000 | 3.97451900  | 0.17688300  |
| H  | -6.74517300 | 2.18891100  | 0.31987700  |
| C  | -4.42433500 | 4.58064000  | -0.44321000 |
| H  | -2.80610100 | 4.34068800  | -1.86514000 |
| H  | -6.12317000 | 4.52971300  | 0.90150700  |
| H  | -4.16500000 | 5.61492900  | -0.20352600 |
| Br | -6.96918100 | 0.60457500  | -2.86262600 |

$\Delta G_{\text{solvation}}^{\text{UM06}} = -0.01550038$   
UB3LYP-D3/def2-TZVPP-CPCM(DMA)// UB3LYP-D3/def2-SVP-CPCM(THF)  
HF= -4659.7424670  
UM06/def2-TZVPP-CPCM(DMA)// UB3LYP-D3/def2-SVP-CPCM(THF)  
HF= -4659.07503520  
DLPNO-CCSD(T)/def2-TZVPP-gas// UB3LYP-D3/def2-SVP-CPCM(THF)  
HF= -4656.14246856537

## <sup>1</sup>C-Complex

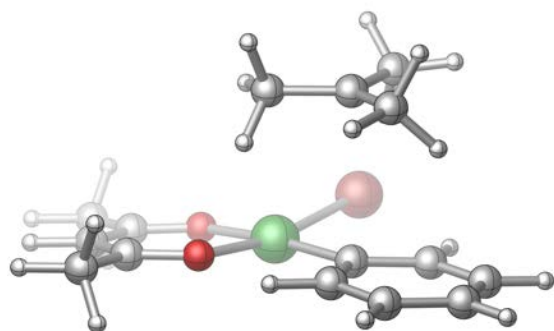

UB3LYP-D3/def2-SVP-CPCM(THF)

$\langle S^2 \rangle = 0.0000$

Zero-point correction= 0.321793 (Hartree/Particle)

Thermal correction to Energy= 0.345372

Thermal correction to Enthalpy= 0.346316

Thermal correction to Gibbs Free Energy= 0.266666

Sum of electronic and zero-point Energies= -4815.961361

Sum of electronic and thermal Energies= -4815.937782

Sum of electronic and thermal Enthalpies= -4815.936838

Sum of electronic and thermal Free Energies= -4816.016488

|    |             |             |             |
|----|-------------|-------------|-------------|
| C  | -2.39389900 | -0.51158900 | 0.85223300  |
| O  | -3.16522000 | 0.50574200  | 0.78907600  |
| C  | -2.71944800 | -1.79987800 | 0.41085300  |
| H  | -1.98340700 | -2.59607000 | 0.51874000  |
| C  | -3.97684100 | -2.09793400 | -0.15803300 |
| O  | -4.89931000 | -1.24925400 | -0.33500800 |
| C  | -4.29154200 | -3.50971500 | -0.59734200 |
| H  | -5.16367100 | -3.87591700 | -0.03156700 |
| H  | -4.58235000 | -3.49963100 | -1.66004200 |
| H  | -3.45120300 | -4.20207400 | -0.45432900 |
| C  | -1.03817200 | -0.23166100 | 1.45705400  |
| H  | -1.17136600 | 0.17955600  | 2.47068300  |
| H  | -0.40097400 | -1.12445700 | 1.50836900  |
| H  | -0.52952400 | 0.54356600  | 0.86098000  |
| Ni | -4.91195500 | 0.64605000  | 0.07844800  |
| C  | -4.99953900 | 2.50811500  | 0.65906200  |
| C  | -6.12341400 | 3.35603800  | 0.49553300  |
| C  | -3.91788700 | 3.08391300  | 1.37120400  |
| C  | -6.15450200 | 4.67390600  | 0.96723000  |
| H  | -7.00179300 | 2.98136900  | -0.02977600 |
| C  | -3.93725600 | 4.39577400  | 1.85616400  |
| H  | -3.02687800 | 2.48050200  | 1.54351300  |
| C  | -5.05541000 | 5.21046400  | 1.64826300  |
| H  | -7.04731600 | 5.28507700  | 0.80167100  |
| H  | -3.06751200 | 4.78736500  | 2.39322600  |



|    |             |            |             |
|----|-------------|------------|-------------|
| H  | -5.07368500 | 6.24054700 | 2.01495700  |
| Br | -6.93045800 | 0.69849500 | -1.24748000 |
| C  | -3.78836200 | 3.27854900 | -2.07598600 |
| C  | -2.83200500 | 2.16456600 | -1.96954600 |
| H  | -3.23484300 | 1.21227300 | -2.33469500 |
| H  | -1.94892600 | 2.45282100 | -2.57626200 |
| H  | -2.47887700 | 2.05448900 | -0.93337400 |
| C  | -3.44417400 | 4.59300800 | -1.51780700 |
| H  | -4.29727800 | 5.00047100 | -0.94601400 |
| H  | -2.54094700 | 4.58697700 | -0.89899700 |
| H  | -3.31618400 | 5.27966000 | -2.37812800 |
| C  | -5.01093400 | 3.10074300 | -2.82892700 |
| H  | -5.63665200 | 2.37048200 | -2.23075300 |
| H  | -5.58515500 | 4.01886200 | -2.99881900 |
| H  | -4.82514200 | 2.53406000 | -3.75685000 |

$\Delta G_{\text{solvation}}^{\text{UM06}} = -0.02574488$

UB3LYP-D3/def2-TZVPP-CPCM(DMA)// UB3LYP-D3/def2-SVP-CPCM(THF)

HF= -4817.6391478

UM06/def2-TZVPP-CPCM(DMA)// UB3LYP-D3/def2-SVP-CPCM(THF)

HF= -4816.82739558

DLPNO-CCSD(T)/def2-TZVPP-gas// UB3LYP-D3/def2-SVP-CPCM(THF)

HF= -4813.64164587687

### <sup>3</sup>C-Complex

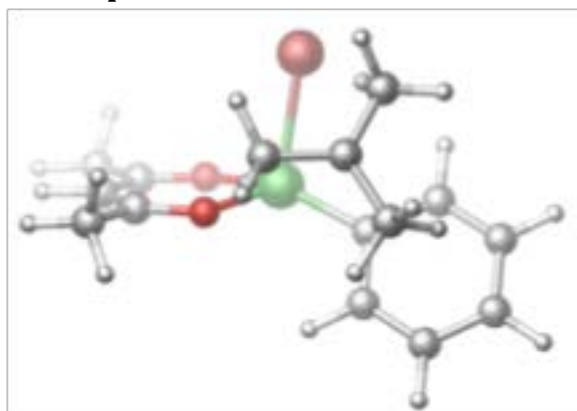

UB3LYP-D3/def2-SVP-CPCM(THF)

Zero-point correction= 0.319982 (Hartree/Particle)

Thermal correction to Energy= 0.344022

Thermal correction to Enthalpy= 0.344966

Thermal correction to Gibbs Free Energy= 0.262848

Sum of electronic and zero-point Energies= -4815.972389

Sum of electronic and thermal Energies= -4815.948349

Sum of electronic and thermal Enthalpies= -4815.947405

Sum of electronic and thermal Free Energies= -4816.029523

|    |             |             |             |
|----|-------------|-------------|-------------|
| C  | -4.15367600 | -1.41276300 | 2.26173000  |
| O  | -4.35116300 | -0.19214200 | 2.52854000  |
| C  | -3.73006500 | -1.91348600 | 1.00408200  |
| H  | -3.60922400 | -2.99215100 | 0.90413100  |
| C  | -3.43197400 | -1.12180400 | -0.11561500 |
| O  | -3.50121800 | 0.15626900  | -0.15480400 |
| C  | -2.99001800 | -1.78044500 | -1.40201000 |
| H  | -3.75492200 | -1.60320000 | -2.17660300 |
| H  | -2.06059400 | -1.30531600 | -1.75349600 |
| H  | -2.83458800 | -2.86246800 | -1.30039500 |
| C  | -4.40031600 | -2.38362100 | 3.39540800  |
| H  | -3.77611000 | -2.09581800 | 4.25669500  |
| H  | -5.45031300 | -2.29249200 | 3.71819700  |
| H  | -4.19265200 | -3.42806000 | 3.12751500  |
| Ni | -4.26902900 | 1.34948400  | 1.25137300  |
| C  | -3.56788700 | 3.12039600  | 0.70705800  |
| C  | -4.28449200 | 4.33358900  | 0.78157700  |
| C  | -2.21259500 | 3.21856100  | 0.32091500  |
| C  | -3.69088500 | 5.57106100  | 0.49728400  |
| H  | -5.34321100 | 4.30433700  | 1.06194300  |
| C  | -1.59909800 | 4.44647300  | 0.04030500  |
| H  | -1.61930500 | 2.30107200  | 0.22867700  |
| C  | -2.34013100 | 5.63197100  | 0.12702100  |
| H  | -4.27959300 | 6.49178900  | 0.56253000  |

|    |             |            |             |
|----|-------------|------------|-------------|
| H  | -0.54563900 | 4.48189000 | -0.25554800 |
| H  | -1.87154100 | 6.59461500 | -0.09671300 |
| Br | -6.71638600 | 1.45750200 | 0.76756600  |
| C  | -4.65053800 | 2.79903500 | -2.50779300 |
| C  | -3.54389200 | 3.74091800 | -2.71956500 |
| H  | -2.55928900 | 3.26066300 | -2.75496800 |
| H  | -3.75079400 | 4.19638600 | -3.71156300 |
| H  | -3.56377800 | 4.56803800 | -1.99440600 |
| C  | -5.95245700 | 3.28546600 | -2.08653800 |
| H  | -6.12663400 | 2.82740200 | -1.06818200 |
| H  | -6.02785300 | 4.37627600 | -2.01441200 |
| H  | -6.76080600 | 2.84453600 | -2.69183100 |
| C  | -4.43574000 | 1.37782900 | -2.69432000 |
| H  | -4.00735400 | 1.03277100 | -1.70193000 |
| H  | -5.35326300 | 0.79746600 | -2.85305000 |
| H  | -3.65027900 | 1.15190900 | -3.42980100 |

$\Delta G_{\text{solvation}}^{\text{UM06}} = -0.02679875$

UB3LYP-D3/def2-TZVPP-CPCM(DMA)// UB3LYP-D3/def2-SVP-CPCM(THF)

HF= -4817.6442305

UM06/def2-TZVPP-CPCM(DMA)// UB3LYP-D3/def2-SVP-CPCM(THF)

HF= -4816.82575635

DLPNO-CCSD(T)/def2-TZVPP-gas// UB3LYP-D3/def2-SVP-CPCM(THF)

HF= -4813.65211594193

## <sup>1</sup>C''-Complex

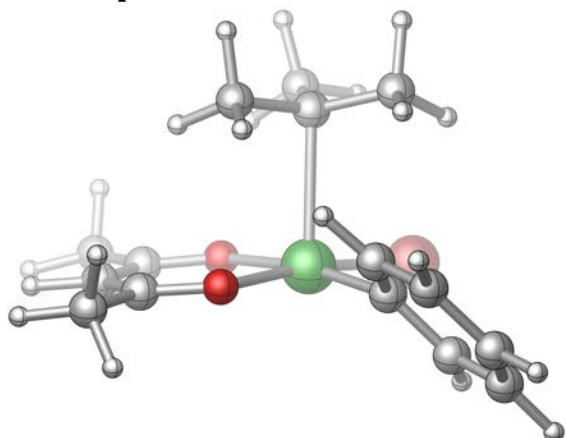

UB3LYP-D3/def2-SVP-CPCM(THF)

$\langle S^2 \rangle = 0.0000$

Zero-point correction= 0.324614 (Hartree/Particle)

Thermal correction to Energy= 0.347556

Thermal correction to Enthalpy= 0.348500

Thermal correction to Gibbs Free Energy= 0.272116

Sum of electronic and zero-point Energies= -4815.971390

Sum of electronic and thermal Energies= -4815.948448

Sum of electronic and thermal Enthalpies= -4815.947503

Sum of electronic and thermal Free Energies= -4816.023888

|    |             |             |             |
|----|-------------|-------------|-------------|
| C  | -2.56409800 | -0.05189600 | 1.57097900  |
| O  | -3.24509600 | 1.01608200  | 1.52880700  |
| C  | -2.66238000 | -1.10373900 | 0.63246700  |
| H  | -2.02670000 | -1.97852900 | 0.76495400  |
| C  | -3.53212100 | -1.07621300 | -0.46587900 |
| O  | -4.34521900 | -0.13186300 | -0.75350300 |
| C  | -3.58261900 | -2.24368800 | -1.42137600 |
| H  | -2.83716500 | -3.01577200 | -1.19078700 |
| H  | -4.59053800 | -2.68868300 | -1.38594200 |
| H  | -3.43024800 | -1.87715000 | -2.44866900 |
| C  | -1.61501700 | -0.17841800 | 2.73942100  |
| H  | -2.20639500 | -0.29521500 | 3.66331200  |
| H  | -0.93160100 | -1.03275600 | 2.64636500  |
| H  | -1.03796200 | 0.75312900  | 2.84200900  |
| Ni | -4.64120100 | 1.52916100  | 0.15583700  |
| C  | -5.73390400 | 2.01241500  | -1.36217900 |
| C  | -6.62198700 | 1.07590000  | -1.91342500 |
| C  | -5.52757900 | 3.21485500  | -2.05731600 |
| C  | -7.32192500 | 1.34630500  | -3.09518700 |
| H  | -6.75783100 | 0.10436400  | -1.43632300 |
| C  | -6.21143900 | 3.48070700  | -3.25325500 |
| H  | -4.83534000 | 3.96122800  | -1.66685400 |
| H  | -8.01675100 | 0.60121800  | -3.49385500 |

|    |             |             |             |
|----|-------------|-------------|-------------|
| H  | -6.03070100 | 4.42495700  | -3.77559300 |
| C  | -6.40956000 | 0.77147400  | 1.74155100  |
| C  | -5.86660600 | 1.18283900  | 3.07146000  |
| H  | -4.81572200 | 0.90108400  | 3.19701600  |
| H  | -5.98730400 | 2.25399300  | 3.26155500  |
| H  | -6.45979300 | 0.61732700  | 3.81893900  |
| C  | -7.62285400 | 1.49747100  | 1.27064300  |
| H  | -7.48049900 | 2.58460200  | 1.29571500  |
| H  | -7.96088300 | 1.18106700  | 0.27916400  |
| H  | -8.41877000 | 1.24568600  | 2.00229500  |
| C  | -6.28906000 | -0.67665700 | 1.40965800  |
| H  | -6.53065400 | -0.89919400 | 0.36531800  |
| H  | -5.30444800 | -1.08750700 | 1.66770200  |
| H  | -7.03971500 | -1.19230200 | 2.04333800  |
| C  | -7.12004700 | 2.55461800  | -3.77175500 |
| H  | -7.66094000 | 2.76739300  | -4.69778500 |
| Br | -4.74380600 | 3.68847500  | 1.10334400  |

$\Delta G_{\text{solvation}}^{\text{UM06}} = -0.01640250$

UB3LYP-D3/def2-TZVPP-CPCM(THF)// UB3LYP-D3/def2-SVP-CPCM(THF)

HF= -4817.64084424

UM06/def2-TZVPP-CPCM(THF)// UB3LYP-D3/def2-SVP-CPCM(THF)

HF= -4816.82646240

DLPNO-CCSD(T)/def2-TZVPP-gas// UB3LYP-D3/def2-SVP-CPCM(THF)

HF= -4813.63811608447

1C'

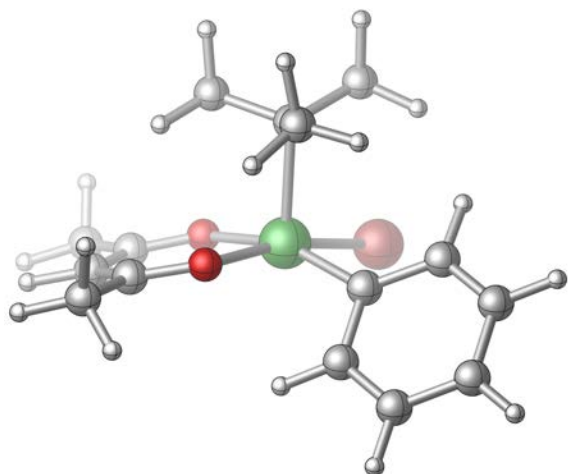

UB3LYP-D3/def2-SVP-CPCM(THF)

$\langle S^2 \rangle = 0.0000$

Zero-point correction= 0.325423 (Hartree/Particle)

Thermal correction to Energy= 0.347952

Thermal correction to Enthalpy= 0.348896

Thermal correction to Gibbs Free Energy= 0.273698

Sum of electronic and zero-point Energies= -4815.975127

Sum of electronic and thermal Energies= -4815.952597

Sum of electronic and thermal Enthalpies= -4815.951653

Sum of electronic and thermal Free Energies= -4816.026851

|    |              |             |             |
|----|--------------|-------------|-------------|
| C  | -4.30533800  | -0.34406200 | 0.82260900  |
| O  | -5.46671300  | 0.16780700  | 0.64013700  |
| C  | -3.50074900  | -0.92262900 | -0.16399200 |
| H  | -2.52904700  | -1.31736900 | 0.12959100  |
| C  | -3.88626900  | -1.00908500 | -1.52163100 |
| O  | -4.98712200  | -0.58324800 | -1.97837200 |
| C  | -2.94568800  | -1.61997800 | -2.53197800 |
| H  | -3.48526700  | -2.38441400 | -3.11230700 |
| H  | -2.63518100  | -0.83676300 | -3.24324500 |
| H  | -2.05215600  | -2.06364000 | -2.07366200 |
| C  | -3.82097100  | -0.25596200 | 2.24854800  |
| H  | -2.85698700  | -0.75844500 | 2.39998400  |
| H  | -3.72549700  | 0.80600700  | 2.52813200  |
| H  | -4.57859300  | -0.69714900 | 2.91499900  |
| Ni | -6.50227900  | 0.19844700  | -0.94819300 |
| C  | -8.09615900  | 0.31863700  | 0.12195900  |
| C  | -9.22403100  | 1.12080100  | -0.08108500 |
| C  | -8.10532000  | -0.61378400 | 1.16896200  |
| C  | -10.32913100 | 1.02564200  | 0.77250400  |
| H  | -9.26388400  | 1.81980500  | -0.91581100 |
| C  | -9.22086600  | -0.72184300 | 2.01314400  |
| H  | -7.24535900  | -1.26051000 | 1.34753700  |

|    |              |             |             |
|----|--------------|-------------|-------------|
| C  | -10.33225000 | 0.10288000  | 1.82498600  |
| H  | -11.19653700 | 1.66954700  | 0.60193500  |
| H  | -9.20915400  | -1.45434300 | 2.82537700  |
| H  | -11.19751200 | 0.02494000  | 2.48836200  |
| Br | -7.85869200  | -0.23305700 | -2.81430900 |
| C  | -6.12142100  | 2.32226000  | -1.09046200 |
| C  | -4.65707600  | 2.26823100  | -1.45419300 |
| H  | -4.03287600  | 1.80718900  | -0.68059400 |
| H  | -4.48784900  | 1.76506300  | -2.41280300 |
| H  | -4.32700000  | 3.31993900  | -1.56103000 |
| C  | -6.39950500  | 2.92315200  | 0.26541100  |
| H  | -7.47184500  | 3.01331100  | 0.47024700  |
| H  | -5.92118600  | 2.35653400  | 1.07135600  |
| H  | -5.96755000  | 3.94255300  | 0.25597000  |
| C  | -6.97276700  | 2.88665500  | -2.19907600 |
| H  | -6.73225300  | 2.45386700  | -3.17629900 |
| H  | -8.04707600  | 2.78417000  | -2.01539400 |
| H  | -6.75013600  | 3.97167700  | -2.23111000 |

$\Delta G_{\text{solvation}}^{\text{UM06}} = -0.01592820$

UB3LYP-D3/def2-TZVPP-CPCM(DMA)// UB3LYP-D3/def2-SVP-CPCM(THF)

HF= -4817.64556732

UM06/def2-TZVPP-CPCM(DMA)// UB3LYP-D3/def2-SVP-CPCM(THF)

HF= -4816.82999570

DLPNO-CCSD(T)/def2-TZVPP-gas// UB3LYP-D3/def2-SVP-CPCM(THF)

HF= -4813.66328229734

# <sup>1</sup>C'-TS

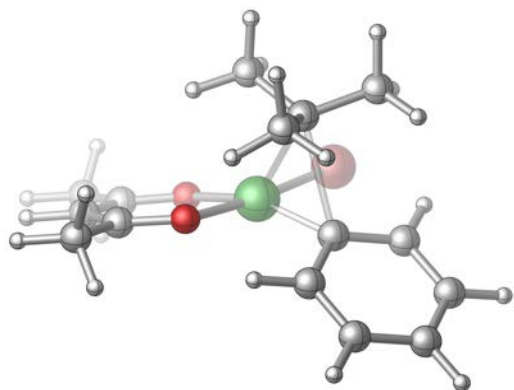

UB3LYP-D3/def2-SVP-CPCM(THF)

Zero-point correction= 0.325398 (Hartree/Particle)

Thermal correction to Energy= 0.347305

Thermal correction to Enthalpy= 0.348249

Thermal correction to Gibbs Free Energy= 0.274271

Sum of electronic and zero-point Energies= -4815.962361

Sum of electronic and thermal Energies= -4815.940454

Sum of electronic and thermal Enthalpies= -4815.939510

Sum of electronic and thermal Free Energies= -4816.013487

|    |              |             |             |
|----|--------------|-------------|-------------|
| C  | -4.07305100  | -0.47179400 | 0.72299900  |
| O  | -5.21739300  | 0.05547100  | 0.50807100  |
| C  | -3.31981100  | -1.16659600 | -0.23020200 |
| H  | -2.35284000  | -1.57653600 | 0.05776300  |
| C  | -3.79081300  | -1.37457500 | -1.54133500 |
| O  | -4.89846000  | -0.94266300 | -1.98728700 |
| C  | -2.96580700  | -2.16396700 | -2.52823400 |
| H  | -3.54296700  | -3.04484700 | -2.85257600 |
| H  | -2.79267100  | -1.54729000 | -3.42439100 |
| H  | -2.00315300  | -2.49127900 | -2.11454000 |
| C  | -3.55362000  | -0.28675400 | 2.12694000  |
| H  | -2.57966800  | -0.76748100 | 2.28527800  |
| H  | -3.46679600  | 0.79119100  | 2.33909100  |
| H  | -4.28610700  | -0.69772300 | 2.83994900  |
| Ni | -6.24064000  | 0.13838100  | -1.10969200 |
| C  | -7.89699300  | 0.65210700  | -0.09676100 |
| C  | -9.14944900  | 0.79710000  | -0.71833000 |
| C  | -7.87409500  | 0.28009600  | 1.26002400  |
| C  | -10.33457300 | 0.54289500  | -0.02069300 |
| H  | -9.20968600  | 1.09428200  | -1.76283400 |
| C  | -9.05935700  | 0.02313200  | 1.95769500  |
| H  | -6.92269700  | 0.18118000  | 1.77724700  |
| C  | -10.29717800 | 0.15377400  | 1.32188800  |
| H  | -11.29244300 | 0.65356700  | -0.53631500 |
| H  | -9.00771500  | -0.27860500 | 3.00751500  |



|    |              |             |             |
|----|--------------|-------------|-------------|
| H  | -11.22395300 | -0.04056900 | 1.86803200  |
| Br | -7.25628200  | 0.20116400  | -3.31752100 |
| C  | -6.49527800  | 2.48171500  | -0.62929300 |
| C  | -5.17178100  | 2.47401100  | -1.38310800 |
| H  | -4.37219700  | 1.92770600  | -0.86779100 |
| H  | -5.26263500  | 2.13048600  | -2.42187300 |
| H  | -4.85246400  | 3.53388100  | -1.42398900 |
| C  | -6.33285300  | 2.87239800  | 0.81735300  |
| H  | -7.29265800  | 2.95925100  | 1.33988000  |
| H  | -5.67778800  | 2.17634200  | 1.35265400  |
| H  | -5.84606500  | 3.86603400  | 0.82104900  |
| C  | -7.56261900  | 3.24373600  | -1.37123800 |
| H  | -7.76831100  | 2.80584400  | -2.35563500 |
| H  | -8.49221000  | 3.33671100  | -0.79839800 |
| H  | -7.16021300  | 4.26105800  | -1.53518800 |

$\Delta G_{\text{solvation}}^{\text{UM06}} = -0.01578531$

UB3LYP-D3/def2-TZVPP-CPCM(DMA)// UB3LYP-D3/def2-SVP-CPCM(THF)

HF= -4817.63196236

UM06/def2-TZVPP-CPCM(DMA)// UB3LYP-D3/def2-SVP-CPCM(THF)

HF= -4816.82172077

DLPNO-CCSD(T)/def2-TZVPP-gas// UB3LYP-D3/def2-SVP-CPCM(THF)

HF= -4813.65006456835

# <sup>1</sup>C-TS

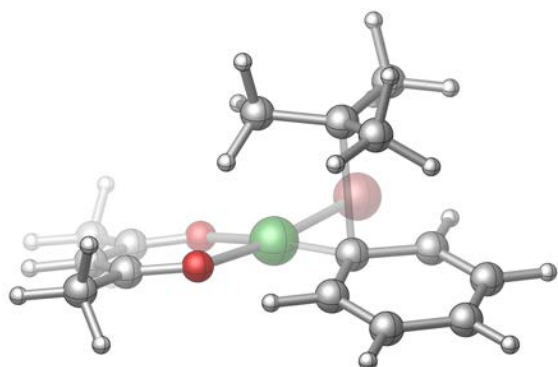

UB3LYP-D3/def2-SVP-CPCM(THF)

Zero-point correction= 0.323859 (Hartree/Particle)

Thermal correction to Energy= 0.346214

Thermal correction to Enthalpy= 0.347158

Thermal correction to Gibbs Free Energy= 0.271504

Sum of electronic and zero-point Energies= -4815.958572

Sum of electronic and thermal Energies= -4815.936217

Sum of electronic and thermal Enthalpies= -4815.935273

Sum of electronic and thermal Free Energies= -4816.010927

|    |             |             |             |
|----|-------------|-------------|-------------|
| C  | -2.31677600 | -0.52043500 | 0.71526300  |
| O  | -3.09316900 | 0.48973200  | 0.61191500  |
| C  | -2.66193400 | -1.83578400 | 0.38478000  |
| H  | -1.92370800 | -2.62590900 | 0.51776900  |
| C  | -3.94469700 | -2.16533600 | -0.10222400 |
| O  | -4.87180500 | -1.32585600 | -0.30197000 |
| C  | -4.28888000 | -3.60301700 | -0.41523600 |
| H  | -5.11266400 | -3.92526100 | 0.24255800  |
| H  | -4.66226100 | -3.66774500 | -1.44950100 |
| H  | -3.43791500 | -4.28519100 | -0.28750900 |
| C  | -0.93617200 | -0.19863500 | 1.23552200  |
| H  | -1.02328100 | 0.29140100  | 2.21861600  |
| H  | -0.29783400 | -1.08722100 | 1.32771500  |
| H  | -0.45437600 | 0.52495600  | 0.55767100  |
| Ni | -4.86499600 | 0.58582400  | -0.04958400 |
| C  | -4.90608600 | 2.52000300  | 0.35886900  |
| C  | -6.04267300 | 3.35988500  | 0.18257800  |
| C  | -3.91875200 | 3.02813100  | 1.25252500  |
| C  | -6.18028700 | 4.59194300  | 0.82211500  |
| H  | -6.83748700 | 3.03000000  | -0.48546600 |
| C  | -4.04636800 | 4.25246500  | 1.90523600  |
| H  | -3.02458700 | 2.43032400  | 1.42612500  |
| C  | -5.17815400 | 5.04973800  | 1.68712100  |
| H  | -7.07112600 | 5.20082000  | 0.64448300  |
| H  | -3.25862500 | 4.59507100  | 2.58225300  |
| H  | -5.27734800 | 6.01794800  | 2.18550100  |

|    |             |            |             |
|----|-------------|------------|-------------|
| Br | -7.00945500 | 0.52068600 | -1.13207000 |
| C  | -3.84272600 | 3.24560100 | -1.79453200 |
| C  | -2.85038500 | 2.14864400 | -1.92283300 |
| H  | -3.29711300 | 1.20688400 | -2.26338500 |
| H  | -2.12888200 | 2.49671900 | -2.69059600 |
| H  | -2.29171800 | 1.98245100 | -0.99492400 |
| C  | -3.34809200 | 4.57349000 | -1.35644300 |
| H  | -4.12468400 | 5.16280300 | -0.84725200 |
| H  | -2.44764300 | 4.51311700 | -0.73492000 |
| H  | -3.10468400 | 5.12032300 | -2.28966100 |
| C  | -5.02868200 | 3.20251600 | -2.68368200 |
| H  | -5.59850300 | 2.27022600 | -2.55158300 |
| H  | -5.68496100 | 4.07287000 | -2.56557700 |
| H  | -4.62680000 | 3.19333100 | -3.71704800 |

$\Delta G_{\text{solvation}}^{\text{UM06}} = -0.02375768$

UB3LYP-D3/def2-TZVPP-CPCM(DMA)// UB3LYP-D3/def2-SVP-CPCM(THF)

HF=-4817.63659718

UM06/def2-TZVPP-CPCM(DMA)// UB3LYP-D3/def2-SVP-CPCM(THF)

HF= -4816.82544584

DLPNO-CCSD(T)/def2-TZVPP-gas// UB3LYP-D3/def2-SVP-CPCM(THF)

HF= -4816.801688160

<sup>3</sup>C'

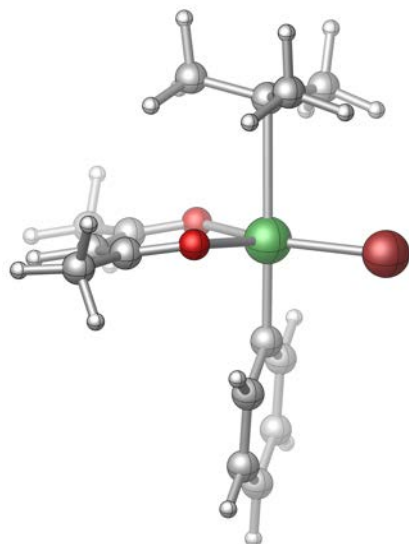

Zero-point correction= 0.322394 (Hartree/Particle)  
Thermal correction to Energy= 0.346206  
Thermal correction to Enthalpy= 0.347150  
Thermal correction to Gibbs Free Energy= 0.265944  
Sum of electronic and zero-point Energies= -4815.969566  
Sum of electronic and thermal Energies= -4815.945754  
Sum of electronic and thermal Enthalpies= -4815.944810  
Sum of electronic and thermal Free Energies= -4816.026016

|    |             |             |             |
|----|-------------|-------------|-------------|
| C  | -2.71674100 | 0.15818900  | 0.46731300  |
| O  | -3.68961800 | 0.76472700  | 1.01871000  |
| C  | -2.84124300 | -0.89722800 | -0.46363200 |
| H  | -1.92410400 | -1.32440800 | -0.86729900 |
| C  | -4.05853200 | -1.47163300 | -0.87047100 |
| O  | -5.21790200 | -1.08617400 | -0.49479200 |
| C  | -4.06055500 | -2.65359500 | -1.80629400 |
| H  | -3.05063800 | -2.96868500 | -2.09848800 |
| H  | -4.58026500 | -3.49553100 | -1.32115400 |
| H  | -4.64035000 | -2.39382100 | -2.70661200 |
| C  | -1.34435300 | 0.63578500  | 0.87462200  |
| H  | -1.27105600 | 0.62861200  | 1.97340500  |
| H  | -0.53425200 | 0.03103100  | 0.44706900  |
| H  | -1.22480200 | 1.68294100  | 0.55117000  |
| Ni | -5.57704200 | 0.53911500  | 0.46401600  |
| C  | -5.46032000 | 1.54197700  | -1.17637500 |
| C  | -6.30204000 | 1.16259200  | -2.21934600 |
| C  | -4.51593300 | 2.55468800  | -1.32304700 |
| C  | -6.18500300 | 1.81631800  | -3.45483700 |
| H  | -7.03210300 | 0.36077100  | -2.08662300 |
| C  | -4.40562300 | 3.19862400  | -2.56419000 |
| H  | -3.87784800 | 2.84052900  | -0.48566300 |

|    |             |             |             |
|----|-------------|-------------|-------------|
| C  | -5.23777300 | 2.83176700  | -3.62770800 |
| H  | -6.83712900 | 1.52338800  | -4.28243800 |
| H  | -3.66636900 | 3.99430900  | -2.69264000 |
| H  | -5.14927800 | 3.33860400  | -4.59196600 |
| Br | -6.88502600 | 2.24706700  | 1.39887900  |
| C  | -5.85136200 | -1.03027400 | 2.56522100  |
| C  | -5.44340900 | -0.08607000 | 3.65131700  |
| H  | -4.42897300 | 0.30321700  | 3.47266700  |
| H  | -6.13525600 | 0.75959600  | 3.75236300  |
| H  | -5.41939200 | -0.63468600 | 4.61627100  |
| C  | -7.30547000 | -1.27937200 | 2.31401200  |
| H  | -7.90724800 | -0.36629700 | 2.41787800  |
| H  | -7.47114900 | -1.71116400 | 1.31364800  |
| H  | -7.68088500 | -2.02395000 | 3.04851200  |
| C  | -4.90689700 | -2.15583500 | 2.28389100  |
| H  | -5.21957800 | -2.75774100 | 1.42086700  |
| H  | -3.87937800 | -1.79936300 | 2.11999200  |
| H  | -4.87840500 | -2.82348200 | 3.16979100  |

$\Delta G_{\text{solvation}}^{\text{UM06}} = -0.01168905$

UB3LYP-D3/def2-TZVPP-CPCM(DMA)// UB3LYP-D3/def2-SVP-CPCM(THF)

HF= -4817.63659718

UM06/def2-TZVPP-CPCM(DMA)// UB3LYP-D3/def2-SVP-CPCM(THF)

HF= -4816.82544584

DLPNO-CCSD(T)/def2-TZVPP-gas// UB3LYP-D3/def2-SVP-CPCM(THF)

HF= -4813.66623270917

### <sup>3</sup>C-TS

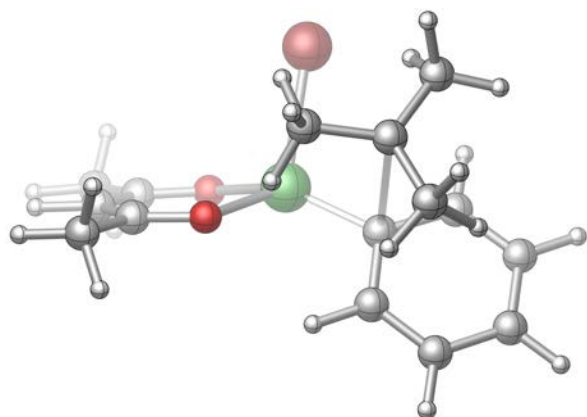

UB3LYP-D3/def2-SVP-CPCM(THF)

Zero-point correction= 0.320766 (Hartree/Particle)

Thermal correction to Energy= 0.344184

Thermal correction to Enthalpy= 0.345128

Thermal correction to Gibbs Free Energy= 0.264977

Sum of electronic and zero-point Energies= -4815.969306

Sum of electronic and thermal Energies= -4815.945888

Sum of electronic and thermal Enthalpies= -4815.944944

Sum of electronic and thermal Free Energies= -4816.025095

|    |             |             |             |
|----|-------------|-------------|-------------|
| C  | -4.17569500 | -1.41235000 | 2.26028700  |
| O  | -4.45944600 | -0.18562600 | 2.40579100  |
| C  | -3.60900800 | -1.98301900 | 1.09566100  |
| H  | -3.41889300 | -3.05637000 | 1.09739000  |
| C  | -3.22444000 | -1.25305200 | -0.04437100 |
| O  | -3.37533000 | 0.00339800  | -0.20266800 |
| C  | -2.56208900 | -1.96938400 | -1.20010100 |
| H  | -3.17651000 | -1.83288600 | -2.10524300 |
| H  | -1.58602000 | -1.49942100 | -1.40242800 |
| H  | -2.41819300 | -3.04292200 | -1.01976200 |
| C  | -4.47673300 | -2.30100600 | 3.44709800  |
| H  | -3.95559700 | -1.90616400 | 4.33410100  |
| H  | -5.55654600 | -2.25081300 | 3.66312500  |
| H  | -4.18688000 | -3.34853900 | 3.29038100  |
| Ni | -4.38550600 | 1.22748000  | 0.99835600  |
| C  | -3.69264400 | 2.99837000  | 0.39281200  |
| C  | -4.33254400 | 4.23459000  | 0.63232500  |
| C  | -2.31962000 | 3.05650300  | 0.05320800  |
| C  | -3.65690000 | 5.45632800  | 0.53510600  |
| H  | -5.39649800 | 4.23584400  | 0.89250400  |
| C  | -1.62390700 | 4.26538500  | -0.03657000 |
| H  | -1.78874700 | 2.11986800  | -0.15035700 |
| C  | -2.29683700 | 5.47446400  | 0.19508000  |
| H  | -4.18578800 | 6.39627300  | 0.71990000  |

|    |             |            |             |
|----|-------------|------------|-------------|
| H  | -0.56153800 | 4.27464600 | -0.29885800 |
| H  | -1.76414900 | 6.42571200 | 0.11003600  |
| Br | -6.83441500 | 1.24573900 | 0.56164400  |
| C  | -4.70877100 | 3.03216600 | -2.30928500 |
| C  | -3.59189600 | 3.87447000 | -2.76245400 |
| H  | -2.66149900 | 3.31955800 | -2.92536100 |
| H  | -3.92879800 | 4.32085900 | -3.72098200 |
| H  | -3.42884100 | 4.72688000 | -2.08357800 |
| C  | -5.99990900 | 3.64971600 | -1.99038000 |
| H  | -6.44553000 | 3.14142100 | -1.11290700 |
| H  | -5.95342000 | 4.73686700 | -1.86120500 |
| H  | -6.67907700 | 3.39382200 | -2.82949800 |
| C  | -4.64388000 | 1.57410500 | -2.48245000 |
| H  | -3.72960500 | 1.15204300 | -2.03797500 |
| H  | -5.52063200 | 1.05891000 | -2.07283800 |
| H  | -4.57697000 | 1.40007400 | -3.57653100 |

$\Delta G_{\text{solvation}}^{\text{UM06}} = -0.02583388$

UB3LYP-D3/def2-TZVPP-CPCM(DMA)// UB3LYP-D3/def2-SVP-CPCM(THF)

HF= -4817.64143428

UM06/def2-TZVPP-CPCM(DMA)// UB3LYP-D3/def2-SVP-CPCM(THF)

HF= -4816.82379643

# <sup>1</sup>C''-TS

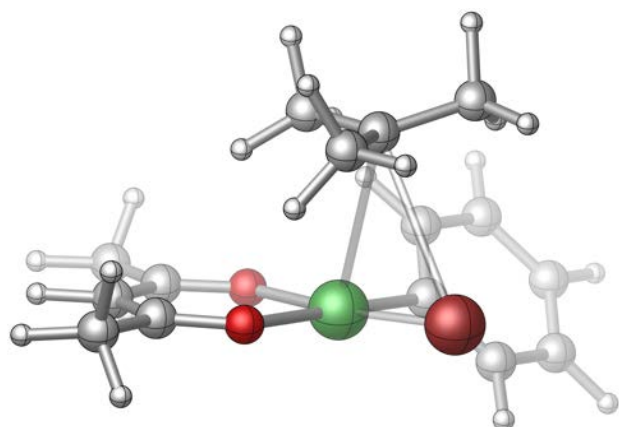

UB3LYP-D3/def2-SVP-CPCM(THF)

Zero-point correction= 0.323194 (Hartree/Particle)

Thermal correction to Energy= 0.345704

Thermal correction to Enthalpy= 0.346648

Thermal correction to Gibbs Free Energy= 0.270392

Sum of electronic and zero-point Energies= -4815.963060

Sum of electronic and thermal Energies= -4815.940550

Sum of electronic and thermal Enthalpies= -4815.939606

Sum of electronic and thermal Free Energies= -4816.015862

|    |             |             |             |
|----|-------------|-------------|-------------|
| C  | -2.61804000 | -0.11587600 | 1.50279400  |
| O  | -3.28107000 | 0.96028700  | 1.36471500  |
| C  | -2.62710600 | -1.17982700 | 0.57954600  |
| H  | -2.02814200 | -2.06374500 | 0.79722900  |
| C  | -3.36956400 | -1.15248000 | -0.61512500 |
| O  | -4.10550200 | -0.18872600 | -1.00732800 |
| C  | -3.33683000 | -2.33974000 | -1.54909400 |
| H  | -2.68961400 | -3.15038800 | -1.18927200 |
| H  | -4.36200100 | -2.72257200 | -1.67947400 |
| H  | -2.99105500 | -2.00886900 | -2.54157800 |
| C  | -1.81107900 | -0.22777000 | 2.77527900  |
| H  | -2.50250600 | -0.29135000 | 3.63256000  |
| H  | -1.14990300 | -1.10450300 | 2.78907900  |
| H  | -1.21601900 | 0.68866400  | 2.91009200  |
| Ni | -4.45396200 | 1.44872600  | -0.12523600 |
| C  | -5.56794100 | 1.92570100  | -1.58861800 |
| C  | -6.50501600 | 1.00619300  | -2.09445700 |
| C  | -5.46396400 | 3.16350700  | -2.25127500 |
| C  | -7.32553600 | 1.31348300  | -3.18889900 |
| H  | -6.57766400 | 0.01011700  | -1.64810500 |
| C  | -6.26175600 | 3.47232000  | -3.36084400 |
| H  | -4.75242000 | 3.90936400  | -1.88744500 |
| H  | -8.05176700 | 0.57764300  | -3.54881400 |
| H  | -6.14997500 | 4.44165400  | -3.85710400 |



|    |             |             |             |
|----|-------------|-------------|-------------|
| C  | -6.55526900 | 1.09284500  | 2.13554300  |
| C  | -5.84629700 | 1.32869700  | 3.40960500  |
| H  | -4.76541100 | 1.18169700  | 3.26734700  |
| H  | -6.05186700 | 2.31252100  | 3.84399600  |
| H  | -6.18952900 | 0.53314900  | 4.10327300  |
| C  | -7.78354200 | 1.83570800  | 1.78339100  |
| H  | -7.82823400 | 2.83379700  | 2.23076800  |
| H  | -7.92518800 | 1.88416200  | 0.69458200  |
| H  | -8.61811200 | 1.22308900  | 2.18706900  |
| C  | -6.34665000 | -0.21996800 | 1.47810200  |
| H  | -6.65932400 | -0.22871800 | 0.42893000  |
| H  | -5.33118700 | -0.61240300 | 1.59721400  |
| H  | -7.03180800 | -0.90144800 | 2.02842400  |
| C  | -7.20594000 | 2.55126300  | -3.83021700 |
| H  | -7.83821100 | 2.79415900  | -4.68894100 |
| Br | -5.03147700 | 3.39640500  | 1.07445000  |

$\Delta G_{\text{solvation}}^{\text{UM06}} = -0.02358562$

UB3LYP-D3/def2-TZVPP-CPCM(DMA)// UB3LYP-D3/def2-SVP-CPCM(THF)

HF= -4817.63883416

UM06/def2-TZVPP-CPCM(DMA)// UB3LYP-D3/def2-SVP-CPCM(THF)

HF= -4816.82668057

DLPNO-CCSD(T)/def2-TZVPP-gas// UB3LYP-D3/def2-SVP-CPCM(THF)

HF= -4813.64502028160

**1D**

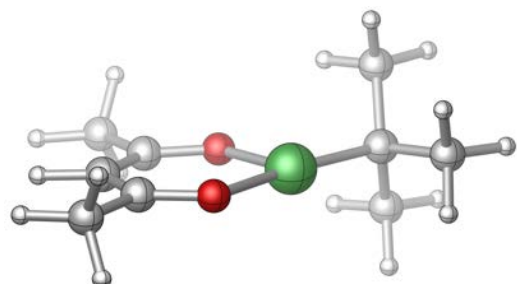

UB3LYP-D3/def2-SVP-CPCM(THF)

$\langle S^2 \rangle = 0.0000$

Zero-point correction= 0.231479 (Hartree/Particle)

Thermal correction to Energy= 0.247258

Thermal correction to Enthalpy= 0.248202

Thermal correction to Gibbs Free Energy= 0.187876

Sum of electronic and zero-point Energies= -2010.679481

Sum of electronic and thermal Energies= -2010.663702

Sum of electronic and thermal Enthalpies= -2010.662758

Sum of electronic and thermal Free Energies= -2010.723084

|    |             |             |             |
|----|-------------|-------------|-------------|
| C  | -3.04816600 | -1.58856000 | -0.57249400 |
| O  | -3.60656400 | -1.11182600 | 0.47582600  |
| C  | -3.70755300 | -2.17290100 | -1.66924000 |
| H  | -3.09228100 | -2.53376600 | -2.49332400 |
| C  | -5.10941900 | -2.32678100 | -1.77738000 |
| O  | -5.94271900 | -1.95284300 | -0.89416000 |
| C  | -5.69777000 | -2.97457500 | -3.00927000 |
| H  | -6.40228000 | -2.27226900 | -3.48390600 |
| H  | -4.93822100 | -3.27644600 | -3.74245500 |
| H  | -6.28308000 | -3.85839000 | -2.70744500 |
| C  | -1.54066400 | -1.48285400 | -0.57486500 |
| H  | -1.08171800 | -1.90585300 | -1.47800800 |
| H  | -1.25437500 | -0.42241300 | -0.48396900 |
| H  | -1.14133700 | -1.99867100 | 0.31328800  |
| Ni | -5.45834700 | -1.07899900 | 0.75321600  |
| C  | -5.36148700 | -0.20184800 | 2.44527100  |
| C  | -6.85048200 | -0.01437400 | 2.74608700  |
| H  | -7.34072500 | 0.64322600  | 2.00600100  |
| H  | -7.39456400 | -0.97745200 | 2.75785000  |
| H  | -7.01234600 | 0.44873200  | 3.74164700  |
| C  | -4.68369100 | -1.13415500 | 3.43934400  |
| H  | -5.21201700 | -2.10018300 | 3.51694800  |
| H  | -3.64852000 | -1.34277500 | 3.12473100  |
| H  | -4.64536400 | -0.69906200 | 4.46062000  |
| C  | -4.62877300 | 1.12534200  | 2.32230600  |
| H  | -3.59170500 | 0.96134600  | 1.99039200  |
| H  | -5.11526600 | 1.79012400  | 1.58796800  |

H -4.59442700 1.67192500 3.28840700  
 $\Delta G_{\text{solvation}}^{\text{UM06}} = -0.01003141$   
UB3LYP-D3/def2-TZVPP-CPCM(DMA)// UB3LYP-D3/def2-SVP-CPCM(THF)  
HF= -2011.69926554  
UM06/def2-TZVPP-CPCM(DMA)// UB3LYP-D3/def2-SVP-CPCM(THF)  
HF= -2011.20902185  
DLPNO-CCSD(T)/def2-TZVPP-gas// UB3LYP-D3/def2-SVP-CPCM(THF)  
HF= -2009.74405799902

3D

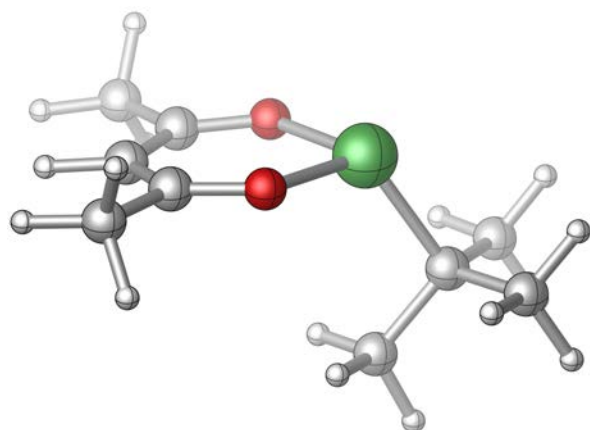

UB3LYP-D3/def2-SVP-CPCM(THF)  
Zero-point correction= 0.230992 (Hartree/Particle)  
Thermal correction to Energy= 0.246945  
Thermal correction to Enthalpy= 0.247889  
Thermal correction to Gibbs Free Energy= 0.185693  
Sum of electronic and zero-point Energies= -2010.689470  
Sum of electronic and thermal Energies= -2010.673517  
Sum of electronic and thermal Enthalpies= -2010.672573  
Sum of electronic and thermal Free Energies= -2010.734769

|    |             |             |             |
|----|-------------|-------------|-------------|
| C  | 2.88294900  | -0.62000300 | -0.03246900 |
| O  | 1.91881300  | -0.10380500 | 0.62159600  |
| C  | 2.75216000  | -1.55531800 | -1.08246100 |
| H  | 3.67019200  | -1.91116500 | -1.55012700 |
| C  | 1.53232200  | -2.03671200 | -1.60597800 |
| O  | 0.37074000  | -1.73345800 | -1.17690700 |
| C  | 1.55555100  | -2.98975900 | -2.77931900 |
| H  | 2.57087600  | -3.24883400 | -3.10707900 |
| H  | 1.01343900  | -3.90930400 | -2.50563400 |
| H  | 1.00744700  | -2.53559800 | -3.62102700 |
| C  | 4.26177700  | -0.15780400 | 0.38065000  |
| H  | 4.40134800  | -0.36319800 | 1.45430900  |
| H  | 5.06838900  | -0.63674200 | -0.18980100 |
| H  | 4.32697900  | 0.93529300  | 0.25450700  |
| Ni | 0.04955000  | -0.57161400 | 0.34993800  |
| C  | -0.70065700 | -1.48494200 | 1.93145700  |
| C  | -0.49386500 | -0.56712600 | 3.13475300  |
| H  | 0.57087200  | -0.30870000 | 3.26301700  |
| H  | -1.05574900 | 0.37752100  | 3.03218300  |
| H  | -0.83381100 | -1.04675900 | 4.07922700  |
| C  | -2.18021400 | -1.78639700 | 1.70272400  |
| H  | -2.77245400 | -0.86448100 | 1.57134700  |
| H  | -2.33162400 | -2.41077700 | 0.80525400  |
| H  | -2.62238800 | -2.33825000 | 2.56176600  |

C 0.10745800 -2.77042800 2.07677300  
H -0.00376700 -3.41607400 1.18970100  
H 1.18320200 -2.55750200 2.19646200  
H -0.21282800 -3.36266100 2.96191300  
 $\Delta G_{\text{solvation}}^{\text{UM06}} = -0.01003141$   
UB3LYP-D3/def2-TZVPP-CPCM(DMA)// UB3LYP-D3/def2-SVP-CPCM(THF)  
HF=-2011.69926554  
UM06/def2-TZVPP-CPCM(DMA)// UB3LYP-D3/def2-SVP-CPCM(THF)  
HF=-2011.20902185  
DLPNO-CCSD(T)/def2-TZVPP-gas// UB3LYP-D3/def2-SVP-CPCM(THF)  
HF=-2009.74405799902

# <sup>1</sup>E-TS

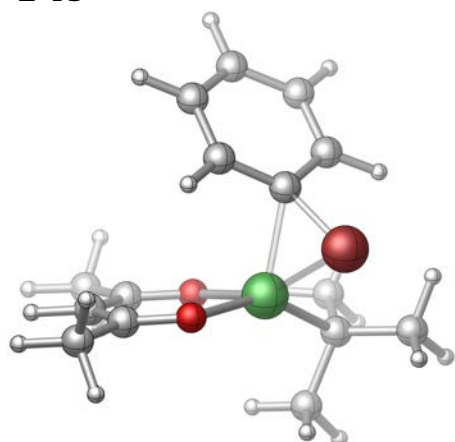

UB3LYP-D3/def2-SVP-CPCM(THF)

Zero-point correction= 0.322368 (Hartree/Particle)

Thermal correction to Energy= 0.345098

Thermal correction to Enthalpy= 0.346042

Thermal correction to Gibbs Free Energy= 0.269644

Sum of electronic and zero-point Energies= -4815.950397

Sum of electronic and thermal Energies= -4815.927667

Sum of electronic and thermal Enthalpies= -4815.926723

Sum of electronic and thermal Free Energies= -4816.003121

|    |             |             |             |
|----|-------------|-------------|-------------|
| C  | -3.00307000 | -1.22231000 | -0.44759300 |
| O  | -3.69710000 | -0.57016400 | 0.39855700  |
| C  | -3.50532800 | -2.02518000 | -1.48790600 |
| H  | -2.78502000 | -2.54792500 | -2.11693700 |
| C  | -4.87949500 | -2.24543200 | -1.72767000 |
| O  | -5.82153700 | -1.67147400 | -1.10282900 |
| C  | -5.30048000 | -3.21663400 | -2.80853300 |
| H  | -5.92334300 | -2.68493600 | -3.54627500 |
| H  | -4.45170200 | -3.68744000 | -3.32225900 |
| H  | -5.93451400 | -3.99931100 | -2.36133900 |
| C  | -1.50734100 | -1.09884400 | -0.25894100 |
| H  | -0.93093600 | -1.64707800 | -1.01580000 |
| H  | -1.23129700 | -0.03259200 | -0.29008900 |
| H  | -1.23818200 | -1.47080900 | 0.74304300  |
| Ni | -5.61982400 | -0.35771600 | 0.40848800  |
| C  | -5.90709600 | 1.45818600  | -0.58928400 |
| C  | -5.36013200 | 1.26412600  | -1.87017900 |
| C  | -5.64389400 | 2.63195200  | 0.13258700  |
| C  | -4.43037100 | 2.18592200  | -2.35379000 |
| H  | -5.63258900 | 0.38379100  | -2.44920300 |
| C  | -4.70978600 | 3.54169800  | -0.36896500 |
| H  | -6.14351500 | 2.81977400  | 1.08192500  |
| C  | -4.09048700 | 3.32024600  | -1.60481400 |
| H  | -3.97233200 | 2.01315200  | -3.33120000 |

|    |             |             |             |
|----|-------------|-------------|-------------|
| H  | -4.47578700 | 4.43687400  | 0.21312900  |
| H  | -3.36454500 | 4.03843500  | -1.99252600 |
| Br | -7.80850500 | 0.56785400  | -0.21395000 |
| C  | -5.56419400 | 0.00627800  | 2.42335200  |
| C  | -6.89048000 | 0.51468900  | 2.95920100  |
| H  | -7.12606700 | 1.52936500  | 2.60747500  |
| H  | -7.72918200 | -0.14284500 | 2.69049600  |
| H  | -6.83591200 | 0.55586700  | 4.06544200  |
| C  | -5.32913200 | -1.45368400 | 2.79451400  |
| H  | -6.12726000 | -2.11848900 | 2.42136800  |
| H  | -4.36071200 | -1.82387700 | 2.43036800  |
| H  | -5.33366500 | -1.55297300 | 3.89912500  |
| C  | -4.40834300 | 0.90721100  | 2.80702900  |
| H  | -3.47282800 | 0.58559900  | 2.33408300  |
| H  | -4.59640300 | 1.95486700  | 2.53150400  |
| H  | -4.27091300 | 0.87836700  | 3.90643200  |

$\Delta G_{\text{solvation}}^{\text{UM06}} = -0.00708735$

UB3LYP-D3/def2-TZVPP-CPCM(DMA)// UB3LYP-D3/def2-SVP-CPCM(THF)

HF=-4817.61341725

UM06/def2-TZVPP-CPCM(DMA)// UB3LYP-D3/def2-SVP-CPCM(THF)

HF= -4816.80636293

DLPNO-CCSD(T)/def2-TZVPP-gas// UB3LYP-D3/def2-SVP-CPCM(THF)

HF= -4813.63643423474

### <sup>3</sup>E-TS

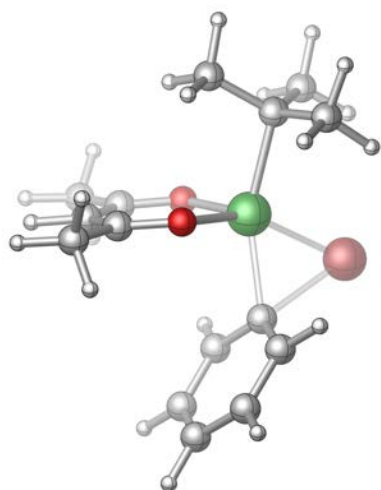

UB3LYP-D3/def2-SVP-CPCM(THF)

Zero-point correction= 0.321470 (Hartree/Particle)

Thermal correction to Energy= 0.344473

Thermal correction to Enthalpy= 0.345417

Thermal correction to Gibbs Free Energy= 0.266848

Sum of electronic and zero-point Energies= -4815.950515

Sum of electronic and thermal Energies= -4815.927512

Sum of electronic and thermal Enthalpies= -4815.926568

Sum of electronic and thermal Free Energies= -4816.005138

|    |             |             |             |
|----|-------------|-------------|-------------|
| C  | -2.61196700 | 0.18283800  | 0.53402100  |
| O  | -3.57685300 | 0.71560400  | 1.16547700  |
| C  | -2.73328900 | -0.77010100 | -0.50178800 |
| H  | -1.81115800 | -1.12268900 | -0.96317200 |
| C  | -3.94146300 | -1.31825200 | -0.98262700 |
| O  | -5.10643500 | -1.03825600 | -0.55492800 |
| C  | -3.90068300 | -2.33891400 | -2.09702900 |
| H  | -2.88247200 | -2.56208300 | -2.44168100 |
| H  | -4.38065000 | -3.26873200 | -1.75113200 |
| H  | -4.49871500 | -1.96485800 | -2.94377800 |
| C  | -1.23439700 | 0.65037500  | 0.94795600  |
| H  | -1.12598000 | 0.53442400  | 2.03789200  |
| H  | -0.42350700 | 0.11249100  | 0.43932800  |
| H  | -1.14444000 | 1.72759400  | 0.73009000  |
| Ni | -5.46981700 | 0.36182000  | 0.73736900  |
| C  | -5.74173500 | 1.86079900  | -0.71154500 |
| C  | -6.72503600 | 1.46517500  | -1.62506000 |
| C  | -4.55920600 | 2.48765400  | -1.11722800 |
| C  | -6.45737200 | 1.59675900  | -2.99090900 |
| H  | -7.66105800 | 1.02595800  | -1.27433300 |
| C  | -4.31227400 | 2.61389600  | -2.48716200 |
| H  | -3.83302600 | 2.81934500  | -0.37499100 |



|    |             |             |             |
|----|-------------|-------------|-------------|
| C  | -5.25373500 | 2.16734500  | -3.42426800 |
| H  | -7.19999000 | 1.25695800  | -3.71758300 |
| H  | -3.37438700 | 3.06516200  | -2.82153700 |
| H  | -5.05435000 | 2.27606500  | -4.49283900 |
| Br | -6.55256900 | 2.46067300  | 1.30294000  |
| C  | -5.88803100 | -0.89029700 | 2.36315000  |
| C  | -5.63925700 | -0.06327600 | 3.60582300  |
| H  | -4.60750700 | 0.32183800  | 3.62181300  |
| H  | -6.32698500 | 0.79121100  | 3.68432400  |
| H  | -5.77669800 | -0.68835000 | 4.51294200  |
| C  | -7.34150600 | -1.22579900 | 2.09787500  |
| H  | -7.98078500 | -0.32864200 | 2.11583400  |
| H  | -7.46946400 | -1.72707100 | 1.12416200  |
| H  | -7.72628600 | -1.92120900 | 2.87410300  |
| C  | -4.95430600 | -2.07471900 | 2.25267900  |
| H  | -5.13629500 | -2.65515100 | 1.33788500  |
| H  | -3.90021200 | -1.75808000 | 2.25673300  |
| H  | -5.09940500 | -2.75296700 | 3.11923200  |

$\Delta G_{\text{solvation}}^{\text{UM06}} = -0.00793865$

UB3LYP-D3/def2-TZVPP-CPCM(DMA)// UB3LYP-D3/def2-SVP-CPCM(THF)

HF= -4817.61456950

UM06/def2-TZVPP-CPCM(DMA)// UB3LYP-D3/def2-SVP-CPCM(THF)

HF= -4816.80487186

DLPNO-CCSD(T)/def2-TZVPP-gas// UB3LYP-D3/def2-SVP-CPCM(THF)

HF= -4813.63413962550

<sup>1</sup>P<sub>A</sub>

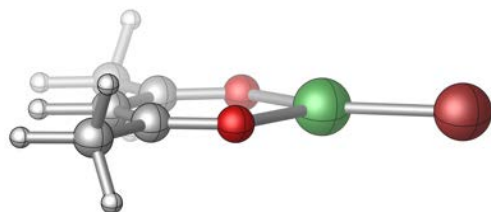

UB3LYP-D3/def2-SVP-CPCM(THF)

<S<sup>2</sup>> = 0.0000

Zero-point correction= 0.113187 (Hartree/Particle)

Thermal correction to Energy= 0.124416

Thermal correction to Enthalpy= 0.125360

Thermal correction to Gibbs Free Energy= 0.073570

Sum of electronic and zero-point Energies= -4426.989320

Sum of electronic and thermal Energies= -4426.978091

Sum of electronic and thermal Enthalpies= -4426.977147

Sum of electronic and thermal Free Energies= -4427.028936

C -2.69078700 -0.69335300 0.04535900

O -3.10573800 0.05502500 -0.90451100

C -3.52303100 -1.49102600 0.85184900

H -3.05780900 -2.09108800 1.63271400

C -4.92182300 -1.55970500 0.70982100

O -5.60859700 -0.91850000 -0.15687200

C -5.73285500 -2.44487400 1.62186500

H -6.27668200 -3.18374600 1.01159500

H -5.11746100 -2.96656100 2.36552200

H -6.49134400 -1.83242700 2.13483000

C -1.20113200 -0.67764400 0.26909300

H -0.69442000 -0.97056400 -0.66433700

H -0.88303500 0.35244000 0.49720500

H -0.88699300 -1.34500100 1.08144700

Ni -4.89234400 0.25158000 -1.44258200

Br -6.68390100 1.00741000 -2.74760800

$\Delta G_{\text{solvation}}^{\text{UM06}} = -0.01991587$

UB3LYP-D3/def2-TZVPP-CPCM(DMA)// UB3LYP-D3/def2-SVP-CPCM(THF)

HF=-4427.55542114

UM06/def2-TZVPP-CPCM(DMA)// UB3LYP-D3/def2-SVP-CPCM(THF)

HF= -4428.01914375

DLPNO-CCSD(T)/def2-TZVPP-gas// UB3LYP-D3/def2-SVP-CPCM(THF)

HF= -4424.94554428170

<sup>3</sup>P<sub>B</sub>

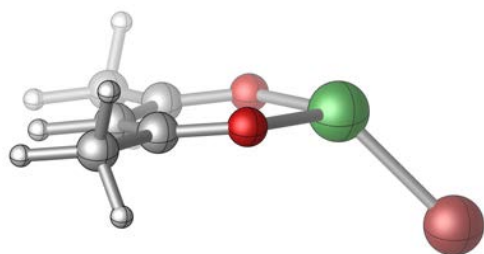

UB3LYP-D3/def2-SVP-CPCM(THF)

Zero-point correction= 0.112925 (Hartree/Particle)

Thermal correction to Energy= 0.124251

Thermal correction to Enthalpy= 0.125196

Thermal correction to Gibbs Free Energy= 0.071801

Sum of electronic and zero-point Energies= -4427.003874

Sum of electronic and thermal Energies= -4426.992547

Sum of electronic and thermal Enthalpies= -4426.991603

Sum of electronic and thermal Free Energies= -4427.044998

|    |             |             |             |
|----|-------------|-------------|-------------|
| C  | -4.20757300 | -0.40855400 | 2.63898700  |
| O  | -5.19577900 | 0.33291600  | 2.31336500  |
| C  | -3.26815500 | -0.95076300 | 1.73918100  |
| H  | -2.47361500 | -1.57001100 | 2.15421500  |
| C  | -3.24996600 | -0.71386500 | 0.34959900  |
| O  | -4.10948800 | -0.01850100 | -0.29141900 |
| C  | -2.14189100 | -1.29426900 | -0.49341100 |
| H  | -2.58428600 | -1.91486600 | -1.28911500 |
| H  | -1.60283000 | -0.47216300 | -0.99154900 |
| H  | -1.43116100 | -1.89547600 | 0.08788200  |
| C  | -4.07828000 | -0.68320200 | 4.11637000  |
| H  | -3.22289600 | -1.32584400 | 4.36080800  |
| H  | -3.98111300 | 0.27525500  | 4.65145700  |
| H  | -5.00727100 | -1.15576500 | 4.47399700  |
| Ni | -5.66814500 | 0.76594500  | 0.50679800  |
| Br | -7.78070400 | 0.13913100  | -0.29285100 |

$\Delta G_{\text{solvation}}^{\text{UM06}} = -0.02500545$

UB3LYP-D3/def2-TZVPP-CPCM(DMA)// UB3LYP-D3/def2-SVP-CPCM(THF)

HF= -4428.04619084

UM06/def2-TZVPP-CPCM(DMA)// UB3LYP-D3/def2-SVP-CPCM(THF)

HF= -4427.57712008

DLPNO-CCSD(T)/def2-TZVPP-gas// UB3LYP-D3/def2-SVP-CPCM(THF)

HF= -4424.90484789000

**<sup>1</sup>P<sub>B</sub>**

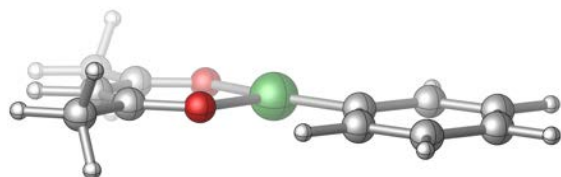

UB3LYP-D3/def2-SVP-CPCM(THF)

Zero-point correction= 0.202049 (Hartree/Particle)

Thermal correction to Energy= 0.216762

Thermal correction to Enthalpy= 0.217706

Thermal correction to Gibbs Free Energy= 0.158091

Sum of electronic and zero-point Energies= -2084.454886

Sum of electronic and thermal Energies= -2084.440173

Sum of electronic and thermal Enthalpies= -2084.439229

Sum of electronic and thermal Free Energies= -2084.498844

|    |             |             |             |
|----|-------------|-------------|-------------|
| C  | -3.48194900 | -1.13581000 | -0.48983600 |
| O  | -4.33939100 | -0.48231100 | -1.17667500 |
| C  | -3.70619700 | -1.71587200 | 0.77299500  |
| H  | -2.87856800 | -2.24759800 | 1.24151500  |
| C  | -4.93100400 | -1.65226000 | 1.47069500  |
| O  | -5.97348900 | -1.06389700 | 1.03670900  |
| C  | -5.06421500 | -2.30948900 | 2.82250600  |
| H  | -5.87443900 | -3.05549000 | 2.78090800  |
| H  | -4.13886900 | -2.79642700 | 3.15644800  |
| H  | -5.36615700 | -1.55135400 | 3.56309700  |
| C  | -2.12617400 | -1.26197300 | -1.14288800 |
| H  | -2.24489600 | -1.74270900 | -2.12716400 |
| H  | -1.72101800 | -0.25367500 | -1.32600300 |
| H  | -1.41193800 | -1.83698000 | -0.53957300 |
| Ni | -6.12012700 | -0.15017800 | -0.63501200 |
| C  | -6.64257400 | 0.84499400  | -2.17224800 |
| C  | -7.98622500 | 1.26568400  | -2.23167400 |
| C  | -5.80052100 | 1.20696400  | -3.23827300 |
| C  | -8.47194300 | 2.02031700  | -3.30933100 |
| H  | -8.67812600 | 1.00321400  | -1.42072400 |
| C  | -6.27457400 | 1.96044600  | -4.31967100 |
| H  | -4.75447400 | 0.88763800  | -3.21292900 |
| C  | -7.61378000 | 2.37016400  | -4.35809600 |
| H  | -9.52006300 | 2.33493900  | -3.33048000 |
| H  | -5.59874200 | 2.23079900  | -5.13727500 |
| H  | -7.98651200 | 2.95857200  | -5.20135600 |

$\Delta G_{\text{solvation}}^{\text{UM06}} = -0.01662909$

UB3LYP-D3/def2-TZVPP-CPCM(DMA)// UB3LYP-D3/def2-SVP-CPCM(THF)

HF= -2085.51525078

UM06/def2-TZVPP-CPCM(DMA)// UB3LYP-D3/def2-SVP-CPCM(THF)

HF= -2084.97451907

DLPNO-CCSD(T)/def2-TZVPP-gas// UB3LYP-D3/def2-SVP-CPCM(THF)  
HF= -2083.39540036421

### ***tert*-Butyl radical**

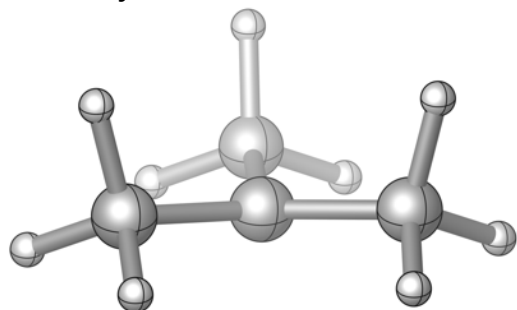

UB3LYP-D3/def2-SVP-CPCM(THF)

Zero-point correction= 0.115524 (Hartree/Particle)

Thermal correction to Energy= 0.121853

Thermal correction to Enthalpy= 0.122797

Thermal correction to Gibbs Free Energy= 0.086138

Sum of electronic and zero-point Energies= -157.575218

Sum of electronic and thermal Energies= -157.568888

Sum of electronic and thermal Enthalpies= -157.567944

Sum of electronic and thermal Free Energies= -157.604604

C 0.05439000 1.47296400 1.28749000

H 1.15371300 1.47939600 1.19271400

H -0.30833600 2.51095700 1.19567200

H -0.16750400 1.15507600 2.33125000

C -2.04795000 0.72978000 0.00109100

H -2.34155300 1.79222600 -0.04829300

H -2.34037500 0.24384600 -0.94544000

H -2.67577200 0.26835000 0.79647700

C 0.05291600 -0.75676200 0.00135100

H -0.30729100 -1.19427100 -0.94544200

H 1.15254900 -0.68014400 -0.04738600

H -0.17378700 -1.50250000 0.79647000

C -0.58858200 0.56453700 0.28731600

$\Delta G_{\text{solvation}}^{\text{UM06}} = -0.00051217$

UB3LYP-D3/def2-TZVPP-CPCM(DMA)// UB3LYP-D3/def2-SVP-CPCM(THF)

HF= -157.86998506

UM06/def2-TZVPP-CPCM(DMA)// UB3LYP-D3/def2-SVP-CPCM(THF)

HF= -157.72008051

DLPNO-CCSD(T)/def2-TZVPP-gas// UB3LYP-D3/def2-SVP-CPCM(THF)

HF= -157.49166663063

## ***t*Bu-Ph**

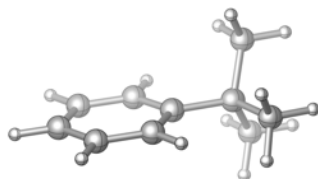

Zero-point correction= 0.212567 (Hartree/Particle)  
Thermal correction to Energy= 0.222196  
Thermal correction to Enthalpy= 0.223140  
Thermal correction to Gibbs Free Energy= 0.178263  
Sum of electronic and zero-point Energies= -389.034497  
Sum of electronic and thermal Energies= -389.024869  
Sum of electronic and thermal Enthalpies= -389.023924  
Sum of electronic and thermal Free Energies= -389.068801

|   |             |             |             |
|---|-------------|-------------|-------------|
| C | -2.58176900 | 1.21472200  | 0.38690900  |
| C | -1.22824900 | 1.17869200  | -0.00409700 |
| C | -0.63158200 | 2.39658000  | -0.37075900 |
| C | -1.35282800 | 3.59764200  | -0.34863500 |
| C | -2.69310700 | 3.61187300  | 0.04204300  |
| C | -3.30571500 | 2.40859500  | 0.41120700  |
| H | -3.08621700 | 0.29102200  | 0.68019000  |
| H | 0.41272100  | 2.42820900  | -0.68195400 |
| H | -0.85703000 | 4.52750500  | -0.64054300 |
| H | -3.25607900 | 4.54860800  | 0.05950800  |
| H | -4.35445400 | 2.39895700  | 0.72043100  |
| C | -0.47089600 | -0.16262400 | -0.01661400 |
| C | -0.47838100 | -0.76833300 | 1.40543100  |
| H | 0.05896700  | -1.73089600 | 1.41423100  |
| H | 0.01717500  | -0.09334900 | 2.12156900  |
| H | -1.50102700 | -0.95357000 | 1.76740000  |
| C | 0.99279300  | -0.00337300 | -0.46382900 |
| H | 1.49247000  | -0.98475200 | -0.45386700 |
| H | 1.06693700  | 0.39712100  | -1.48696000 |
| H | 1.55563000  | 0.66298200  | 0.20845000  |
| C | -1.17186700 | -1.13447600 | -0.99315200 |
| H | -2.21471300 | -1.32907300 | -0.69996500 |
| H | -1.17865300 | -0.72448000 | -2.01584700 |
| H | -0.64427600 | -2.10218800 | -1.01578600 |

$\Delta G_{\text{solvation}}^{\text{UM06}} = -0.00210233$

UB3LYP-D3/def2-TZVPP-CPCM(DMA)// UB3LYP-D3/def2-SVP-CPCM(THF)

HF= -389.32908106

UM06/def2-TZVPP-CPCM(DMA)// UB3LYP-D3/def2-SVP-CPCM(THF)

HF= -389.32942074

DLPNO-CCSD(T)/def2-TZVPP-gas// UB3LYP-D3/def2-SVP-CPCM(THF)

HF= -388.77305156643

### **tBu-Br**

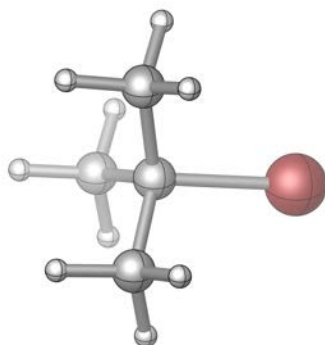

UB3LYP-D3/def2-SVP-CPCM(THF)

Zero-point correction= 0.121383 (Hartree/Particle)

Thermal correction to Energy= 0.127998

Thermal correction to Enthalpy= 0.128942

Thermal correction to Gibbs Free Energy= 0.090831

Sum of electronic and zero-point Energies= -2731.509375

Sum of electronic and thermal Energies= -2731.502760

Sum of electronic and thermal Enthalpies= -2731.501816

Sum of electronic and thermal Free Energies= -2731.539927

C -0.80126600 0.79228800 -0.05867000

C -2.32358400 0.83072300 0.00721800

H -2.69950800 1.86412100 0.00978500

H -2.72789300 0.31834600 -0.88296400

H -2.70045000 0.31407300 0.90179900

C -0.25779100 -0.63025600 0.00764600

H -0.60744900 -1.18347300 -0.88130800

H 0.84182700 -0.64079900 0.00849400

H -0.61779200 -1.15675100 0.90345100

C -0.25801100 1.56088200 -1.25757100

H -0.62018200 2.59917700 -1.26690400

H 0.84159800 1.56916000 -1.26547000

H -0.60583300 1.06605800 -2.18093300

Br -0.11938200 1.75722800 1.61166300

$\Delta G_{\text{solvation}}^{\text{UM06}} = -0.00339442 \text{shang}$

UB3LYP-D3/def2-TZVPP-CPCM(THF)// UB3LYP-D3/def2-SVP-CPCM(THF)

HF= -2732.12476199

UM06/def2-TZVPP-CPCM(THF)// UB3LYP-D3/def2-SVP-CPCM(THF)

HF= -2731.85678123

DLPNO-CCSD(T)/def2-TZVPP-gas// UB3LYP-D3/def2-SVP-CPCM(THF)

HF= -2730.27021223902



**Figure S4**  
**<sup>1</sup>F**

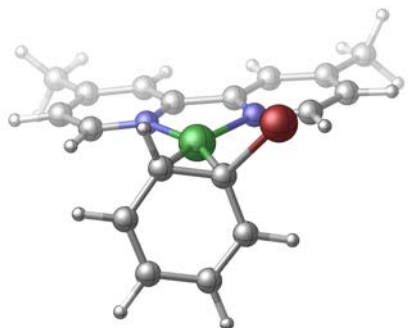

UB3LYP-D3/def2-SVP-CPCM(THF)

<S<sup>2</sup>> = 0.0000

Zero-point correction= 0.303924 (Hartree/Particle)

Thermal correction to Energy= 0.325242

Thermal correction to Enthalpy= 0.326187

Thermal correction to Gibbs Free Energy= 0.250047

Sum of electronic and zero-point Energies= -4886.916607

Sum of electronic and thermal Energies= -4886.895289

Sum of electronic and thermal Enthalpies= -4886.894345

Sum of electronic and thermal Free Energies= -4886.970485

|    |             |             |             |
|----|-------------|-------------|-------------|
| C  | -2.35713200 | 0.66818000  | 1.26433000  |
| C  | -2.03043400 | -0.65370700 | 0.71070300  |
| C  | -2.62076800 | -1.02021400 | -0.55416500 |
| C  | -3.44410600 | -0.14832400 | -1.22864300 |
| C  | -3.81708500 | 1.11177900  | -0.66154400 |
| C  | -3.31437600 | 1.48551300  | 0.56283800  |
| Br | -1.96632800 | -2.28793700 | 2.02852200  |
| H  | -2.38920200 | -2.00165300 | -0.97713300 |
| H  | -2.27581600 | 0.83379700  | 2.34714300  |
| H  | -3.66010700 | 2.41098000  | 1.03589400  |
| H  | -4.52466100 | 1.75435400  | -1.19237200 |
| H  | -3.83293100 | -0.43097800 | -2.21173200 |
| C  | 2.21375300  | 0.23800000  | 0.02640300  |
| C  | 1.28434400  | -1.89145700 | 0.08627200  |
| C  | 2.50108900  | -2.47921900 | -0.24527300 |
| C  | 3.63211900  | -1.67205600 | -0.45328500 |
| C  | 3.46510300  | -0.28824000 | -0.30866900 |
| C  | 1.93080300  | 1.68321100  | 0.20974400  |
| C  | 0.27895400  | 3.23495100  | 0.72077800  |
| C  | 1.17039700  | 4.29550300  | 0.59312500  |
| C  | 2.51051000  | 4.03996100  | 0.25709500  |
| C  | 2.87800700  | 2.70142300  | 0.06452300  |
| H  | 0.38679600  | -2.48706000 | 0.26939100  |

|    |             |             |             |
|----|-------------|-------------|-------------|
| H  | 2.56598100  | -3.56530600 | -0.34084200 |
| H  | 4.31685000  | 0.37601000  | -0.45956400 |
| H  | -0.77124200 | 3.39503000  | 0.97473900  |
| H  | 0.82053000  | 5.31726600  | 0.75559100  |
| H  | 3.90785100  | 2.45862100  | -0.19952300 |
| N  | 1.13741300  | -0.56421400 | 0.21612900  |
| N  | 0.64473000  | 1.95767100  | 0.53838200  |
| Ni | -0.50805500 | 0.38037200  | 0.64864600  |
| C  | 3.49880600  | 5.16258500  | 0.09922700  |
| H  | 4.52387400  | 4.78948200  | -0.03455000 |
| H  | 3.24147300  | 5.78012500  | -0.77752400 |
| H  | 3.47932900  | 5.82800300  | 0.97684100  |
| C  | 4.96407200  | -2.27782300 | -0.80119200 |
| H  | 5.70898400  | -1.51094000 | -1.05612000 |
| H  | 5.35276300  | -2.86437800 | 0.04800500  |
| H  | 4.86880100  | -2.97073500 | -1.65217600 |

UM06/def2-TZVPP-CPCM(THF)//UB3LYP-D3/def2-SVP-CPCM(THF)  
HF=-4887.748303  
UB3LYP-D3/def2-TZVPP-CPCM(THF)//UB3LYP-D3/def2-SVP-CPCM(THF)  
HF=-4888.625241

**3F**

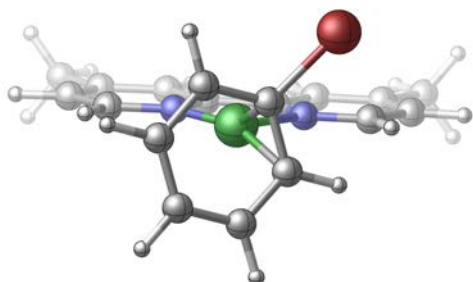

UB3LYP-D3/def2-SVP-CPCM(THF)  
Zero-point correction= 0.303037 (Hartree/Particle)  
Thermal correction to Energy= 0.324280  
Thermal correction to Enthalpy= 0.325224  
Thermal correction to Gibbs Free Energy= 0.249695  
Sum of electronic and zero-point Energies= -4886.907048  
Sum of electronic and thermal Energies= -4886.885805  
Sum of electronic and thermal Enthalpies= -4886.884861  
Sum of electronic and thermal Free Energies= -4886.960390

|    |             |             |             |
|----|-------------|-------------|-------------|
| C  | -2.86004700 | 0.53399500  | 1.63679200  |
| C  | -2.15805200 | -0.57910400 | 1.08878500  |
| C  | -2.26351900 | -0.85908500 | -0.30596100 |
| C  | -3.10501400 | -0.04467300 | -1.10984200 |
| C  | -3.79390400 | 1.02973300  | -0.56253900 |
| C  | -3.64814000 | 1.32896700  | 0.81157400  |
| Br | -1.52628800 | -1.94341300 | 2.30708200  |
| H  | -1.85251500 | -1.78191100 | -0.71809400 |
| H  | -2.77869900 | 0.74475100  | 2.70382100  |
| H  | -4.16773000 | 2.18873400  | 1.24078100  |
| H  | -4.43714500 | 1.64913600  | -1.19054800 |
| H  | -3.21198200 | -0.28990300 | -2.16894500 |
| C  | 2.15628700  | 0.25623200  | -0.12325500 |
| C  | 1.20467500  | -1.89164300 | -0.22112200 |
| C  | 2.43029100  | -2.49963900 | -0.42579900 |
| C  | 3.60169000  | -1.68391100 | -0.48870600 |
| C  | 3.44226400  | -0.31924600 | -0.33446200 |
| C  | 1.90132600  | 1.65745700  | 0.05116200  |
| C  | 0.24662700  | 3.29745600  | 0.41826600  |
| C  | 1.16875300  | 4.32630100  | 0.40858600  |
| C  | 2.55027900  | 4.01179700  | 0.20563700  |
| C  | 2.88970500  | 2.68307500  | 0.03207200  |
| H  | 0.29296100  | -2.49250900 | -0.15567100 |
| H  | 2.49366400  | -3.58438700 | -0.53297200 |
| H  | 4.31863800  | 0.33053900  | -0.37358800 |

|    |             |             |             |
|----|-------------|-------------|-------------|
| H  | -0.81895300 | 3.49727300  | 0.57204000  |
| H  | 0.84330100  | 5.35821500  | 0.55466200  |
| H  | 3.93614900  | 2.41393200  | -0.12380200 |
| N  | 1.03958100  | -0.56588900 | -0.07685900 |
| N  | 0.57121700  | 2.00171800  | 0.24642200  |
| Ni | -0.64075000 | 0.46304200  | 0.21118700  |
| C  | 3.57627900  | 5.11229600  | 0.18684700  |
| H  | 4.59281000  | 4.72480500  | 0.02373200  |
| H  | 3.35484800  | 5.84380100  | -0.60967300 |
| H  | 3.57029400  | 5.67354700  | 1.13742000  |
| C  | 4.94888900  | -2.31570000 | -0.71341400 |
| H  | 5.75680500  | -1.56926700 | -0.72674000 |
| H  | 5.17458600  | -3.05339200 | 0.07598500  |
| H  | 4.97190800  | -2.86455500 | -1.67084600 |

UM06/def2-TZVPP-CPCM(THF)//UB3LYP-D3/def2-SVP-CPCM(THF)

HF=-4887.7324304

UB3LYP-D3/def2-TZVPP-CPCM(THF)//UB3LYP-D3/def2-SVP-CPCM(THF)

HF=-4888.61024

### *tert*-butyl radical

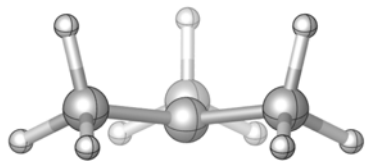

UB3LYP-D3/def2-SVP-CPCM(THF)

Zero-point correction= 0.115524 (Hartree/Particle)

Thermal correction to Energy= 0.121853

Thermal correction to Enthalpy= 0.122797

Thermal correction to Gibbs Free Energy= 0.086138

Sum of electronic and zero-point Energies= -157.575218

Sum of electronic and thermal Energies= -157.568888

Sum of electronic and thermal Enthalpies= -157.567944

Sum of electronic and thermal Free Energies= -157.604604

C -1.40592600 -5.80885900 -0.81665200

C -0.76293300 -4.90023200 -1.81663000

H 0.33639100 -4.89385900 -1.72186500

H -0.98485100 -5.21787700 -2.86045900

H -1.12562200 -3.86224700 -1.72457600

C -2.86529500 -5.64365300 -0.53040600

H -3.49311600 -6.10490200 -1.32589700

H -3.15773800 -6.12978300 0.41601800

H -3.15888000 -4.58121200 -0.48079900

C -0.76445100 -7.13022500 -0.53094900

H 0.33518400 -7.05363400 -0.48219000

H -1.12467000 -7.56791800 0.41575500

H -0.99116000 -7.87580100 -1.32621900

UM06/def2-TZVPP-CPCM(THF)//UB3LYP-D3/def2-SVP-CPCM(THF)

HF=-157.7200251

UB3LYP-D3/def2-TZVPP-CPCM(THF)//UB3LYP-D3/def2-SVP-CPCM(THF)

HF=-157.8699418

**1F'**

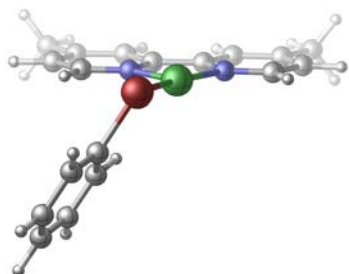

UB3LYP-D3/def2-SVP-CPCM(THF)

$\langle S^2 \rangle = 1.0136$  (before annihilation, 0.1453 after)

Zero-point correction= 0.303179 (Hartree/Particle)

Thermal correction to Energy= 0.324700

Thermal correction to Enthalpy= 0.325644

Thermal correction to Gibbs Free Energy= 0.249331

Sum of electronic and zero-point Energies= -4886.889735

Sum of electronic and thermal Energies= -4886.868214

Sum of electronic and thermal Enthalpies= -4886.867270

Sum of electronic and thermal Free Energies= -4886.943582

|    |             |             |             |
|----|-------------|-------------|-------------|
| Ni | 0.45097900  | 0.75422500  | -0.51615600 |
| C  | -2.61923300 | 1.79943100  | 0.69437800  |
| C  | -3.80753400 | 2.52186400  | 0.78846000  |
| C  | -2.19830900 | 0.91052900  | 1.68156500  |
| C  | -4.60388600 | 2.33902600  | 1.92544600  |
| H  | -4.11043300 | 3.21117600  | -0.00201500 |
| C  | -3.00841600 | 0.74202800  | 2.80967800  |
| H  | -1.26345000 | 0.35964700  | 1.56075100  |
| C  | -4.20732800 | 1.45287100  | 2.93326100  |
| H  | -5.53949000 | 2.89587200  | 2.01842400  |
| H  | -2.69559000 | 0.04769500  | 3.59335200  |
| H  | -4.83495500 | 1.31567000  | 3.81678000  |
| Br | -1.50765300 | 2.03093300  | -0.89197600 |
| N  | 2.28718000  | 0.21033200  | -0.31399000 |
| C  | 4.84792900  | -0.93207900 | 0.03142900  |
| C  | 3.39401500  | 0.97541600  | -0.30108000 |
| C  | 2.41655000  | -1.16425800 | -0.14525500 |
| C  | 3.71534600  | -1.72516400 | 0.02368700  |
| C  | 4.67452600  | 0.47726100  | -0.13626800 |
| N  | 0.03521700  | -1.16120900 | -0.33288500 |
| C  | -0.13784100 | -3.96464000 | -0.05814400 |
| C  | -1.15006500 | -1.78968900 | -0.37876300 |
| C  | 1.19027000  | -1.91125100 | -0.16131900 |

|   |             |             |             |
|---|-------------|-------------|-------------|
| C | 1.08842900  | -3.32614300 | -0.02063400 |
| C | -1.30380400 | -3.15959400 | -0.24831900 |
| H | 3.22394300  | 2.04850100  | -0.43475300 |
| H | 3.81785500  | -2.80464900 | 0.15126000  |
| H | 5.53174800  | 1.15357700  | -0.13713000 |
| H | -2.01951200 | -1.13964800 | -0.52399200 |
| H | 1.99565600  | -3.91758100 | 0.11796900  |
| H | -2.29792000 | -3.60929800 | -0.28986200 |
| C | -0.27003300 | -5.45646000 | 0.09238600  |
| H | 0.70641800  | -5.94504900 | 0.22688500  |
| H | -0.90393100 | -5.71038000 | 0.95979200  |
| H | -0.75831100 | -5.90086800 | -0.79227800 |
| C | 6.22827000  | -1.50473400 | 0.20983000  |
| H | 6.72258100  | -1.07366300 | 1.09787100  |
| H | 6.20833200  | -2.59852100 | 0.32607300  |
| H | 6.87116100  | -1.26235900 | -0.65425100 |

UM06/def2-TZVPP-CPCM(THF)//UB3LYP-D3/def2-SVP-CPCM(THF)  
HF=-4887.7258715  
UB3LYP-D3/def2-TZVPP-CPCM(THF)//UB3LYP-D3/def2-SVP-CPCM(THF)  
HF=-4888.6064849

**<sup>1</sup>F-TS**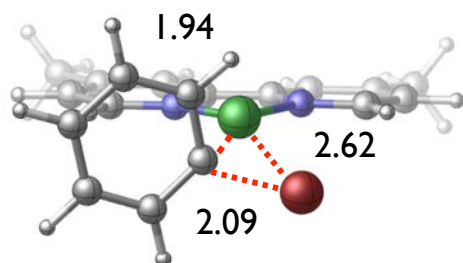

UB3LYP-D3/def2-SVP-CPCM(THF)

Zero-point correction= 0.301918 (Hartree/Particle)

Thermal correction to Energy= 0.322858

Thermal correction to Enthalpy= 0.323802

Thermal correction to Gibbs Free Energy= 0.249700

Sum of electronic and zero-point Energies= -4886.898920

Sum of electronic and thermal Energies= -4886.877980

Sum of electronic and thermal Enthalpies= -4886.877036

Sum of electronic and thermal Free Energies= -4886.951138

|    |             |             |             |
|----|-------------|-------------|-------------|
| C  | -2.70242500 | -0.07554900 | 1.35175300  |
| C  | -2.48593000 | -0.39023000 | -0.01498100 |
| C  | -3.05621300 | 0.39728800  | -1.04546700 |
| C  | -3.73353300 | 1.55588600  | -0.69934200 |
| C  | -3.89777500 | 1.92626000  | 0.65600600  |
| C  | -3.38781700 | 1.11697300  | 1.66513800  |
| Br | -2.12202100 | -2.41383100 | -0.41069800 |
| H  | -2.92249600 | 0.10757100  | -2.08902100 |
| H  | -2.45280700 | -0.78360900 | 2.14542300  |
| H  | -3.54905800 | 1.37642100  | 2.71467400  |
| H  | -4.44490500 | 2.83755500  | 0.90673400  |
| H  | -4.13919000 | 2.19419300  | -1.48866800 |
| C  | 2.19635700  | -0.18511600 | 0.13256200  |
| C  | 1.61021300  | -2.43581700 | 0.48578500  |
| C  | 2.91959700  | -2.85802600 | 0.37086400  |
| C  | 3.94211800  | -1.89307300 | 0.11678500  |
| C  | 3.55615000  | -0.56848700 | -0.00168500 |
| C  | 1.69785800  | 1.16386500  | 0.02495300  |
| C  | -0.22368200 | 2.51283400  | 0.03841500  |
| C  | 0.51265500  | 3.67144500  | -0.13362700 |
| C  | 1.93122600  | 3.58101900  | -0.23607400 |
| C  | 2.50121600  | 2.32069200  | -0.14974900 |
| H  | 0.79904300  | -3.14721000 | 0.66887500  |
| H  | 3.16380100  | -3.91739100 | 0.47412500  |
| H  | 4.30957700  | 0.19363200  | -0.20966200 |
| H  | -1.31199400 | 2.54355600  | 0.12135900  |
| H  | 0.00621600  | 4.63712200  | -0.19221500 |



|    |             |             |             |
|----|-------------|-------------|-------------|
| H  | 3.58624200  | 2.21663100  | -0.20901400 |
| N  | 1.23237700  | -1.14498000 | 0.38190200  |
| N  | 0.32544800  | 1.28692800  | 0.10394600  |
| Ni | -0.59521100 | -0.44560400 | 0.41120500  |
| C  | 2.75756800  | 4.82441400  | -0.42441900 |
| H  | 3.83290500  | 4.59969700  | -0.47785000 |
| H  | 2.46931800  | 5.35042400  | -1.35077400 |
| H  | 2.59448200  | 5.53480400  | 0.40408600  |
| C  | 5.37543700  | -2.32903300 | -0.02113200 |
| H  | 6.04717400  | -1.47871200 | -0.20990800 |
| H  | 5.72017300  | -2.84371400 | 0.89234900  |
| H  | 5.49120200  | -3.04913900 | -0.84959000 |

UM06/def2-TZVPP-CPCM(THF)//UB3LYP-D3/def2-SVP-CPCM(THF)

HF=-4887.7224721

UB3LYP-D3/def2-TZVPP-CPCM(THF)//UB3LYP-D3/def2-SVP-CPCM(THF)

HF=-4888.5888467

### <sup>3</sup>F-TS

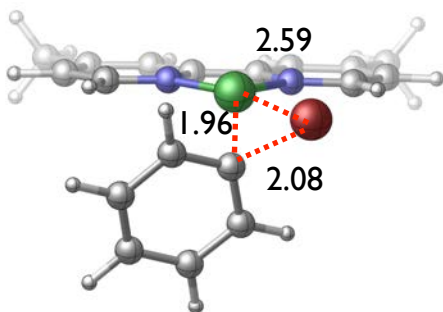

UB3LYP-D3/def2-SVP-CPCM(THF)

Zero-point correction= 0.302378 (Hartree/Particle)

Thermal correction to Energy= 0.323155

Thermal correction to Enthalpy= 0.324099

Thermal correction to Gibbs Free Energy= 0.249623

Sum of electronic and zero-point Energies= -4886.899261

Sum of electronic and thermal Energies= -4886.878484

Sum of electronic and thermal Enthalpies= -4886.877540

Sum of electronic and thermal Free Energies= -4886.952015

|    |             |             |             |
|----|-------------|-------------|-------------|
| C  | -2.98196100 | 0.53763500  | 1.38884700  |
| C  | -2.33565200 | -0.52608900 | 0.72079200  |
| C  | -2.36186400 | -0.63350000 | -0.68707300 |
| C  | -2.91143900 | 0.41192200  | -1.42107900 |
| C  | -3.48624400 | 1.52278900  | -0.77458900 |
| C  | -3.52523800 | 1.57702300  | 0.61953700  |
| Br | -2.08238700 | -2.26280700 | 1.84526800  |
| H  | -1.90111900 | -1.49363900 | -1.17414800 |
| H  | -3.04337300 | 0.55394600  | 2.47831900  |
| H  | -3.99362100 | 2.42496800  | 1.12564600  |
| H  | -3.91880800 | 2.33250400  | -1.36618300 |
| H  | -2.89098200 | 0.36639800  | -2.51298700 |
| C  | 2.05129500  | -0.07640600 | 0.27065900  |
| C  | 1.46030100  | -2.33969800 | 0.54765700  |
| C  | 2.64594000  | -2.78631300 | -0.00664700 |
| C  | 3.60420100  | -1.82406500 | -0.45249700 |
| C  | 3.28789500  | -0.48615500 | -0.30556800 |
| C  | 1.64408500  | 1.28764500  | 0.46008000  |
| C  | -0.06051900 | 2.71784700  | 1.23765500  |
| C  | 0.65030600  | 3.85620700  | 0.90591100  |
| C  | 1.94513700  | 3.71219100  | 0.31631600  |
| C  | 2.41633100  | 2.43014600  | 0.10215400  |
| H  | 0.70141500  | -3.04605900 | 0.89799400  |
| H  | 2.84014600  | -3.85685000 | -0.09874500 |
| H  | 3.99931200  | 0.27131700  | -0.63996600 |
| H  | -1.05796400 | 2.78637800  | 1.68256700  |

|    |             |             |             |
|----|-------------|-------------|-------------|
| H  | 0.22330000  | 4.84404900  | 1.09008300  |
| H  | 3.39904400  | 2.29004700  | -0.35189200 |
| N  | 1.14828700  | -1.03991000 | 0.69664600  |
| N  | 0.39751300  | 1.46825400  | 1.04211400  |
| Ni | -0.52639600 | -0.24001900 | 1.41846100  |
| C  | 2.74293800  | 4.93376200  | -0.05191900 |
| H  | 3.71690200  | 4.67299800  | -0.49169400 |
| H  | 2.19380200  | 5.55869000  | -0.77748000 |
| H  | 2.92340600  | 5.56765700  | 0.83347900  |
| C  | 4.90367700  | -2.28019500 | -1.05894700 |
| H  | 5.54204100  | -1.43300400 | -1.35015000 |
| H  | 5.46934000  | -2.91019800 | -0.35082700 |
| H  | 4.72425000  | -2.89977300 | -1.95472800 |

UM06/def2-TZVPP-CPCM(THF)//UB3LYP-D3/def2-SVP-CPCM(THF)

HF=-4887.7206594

UB3LYP-D3/def2-TZVPP-CPCM(THF)//UB3LYP-D3/def2-SVP-CPCM(THF)

HF=-4888.6028485

### <sup>1</sup>F'-TS

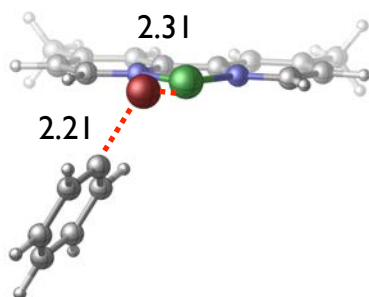

UB3LYP-D3/def2-SVP-CPCM(THF)

Zero-point correction= 0.302070 (Hartree/Particle)

Thermal correction to Energy= 0.323321

Thermal correction to Enthalpy= 0.324265

Thermal correction to Gibbs Free Energy= 0.248135

Sum of electronic and zero-point Energies= -4886.884886

Sum of electronic and thermal Energies= -4886.863635

Sum of electronic and thermal Enthalpies= -4886.862690

Sum of electronic and thermal Free Energies= -4886.938820

|    |             |             |             |
|----|-------------|-------------|-------------|
| Ni | -3.25440100 | 1.69922200  | -0.86461000 |
| C  | -6.35073000 | 2.74589100  | 0.53308000  |
| C  | -7.53839400 | 3.44711300  | 0.67417300  |
| C  | -5.86220800 | 1.86132000  | 1.48043900  |
| C  | -8.28028700 | 3.24455700  | 1.84917500  |
| H  | -7.88972100 | 4.13539600  | -0.10011600 |
| C  | -6.61321900 | 1.66746500  | 2.64876800  |
| H  | -4.91949200 | 1.33067400  | 1.30643200  |
| C  | -7.81837600 | 2.35839500  | 2.83071200  |
| H  | -9.22162300 | 3.78253300  | 1.99505000  |
| H  | -6.25559300 | 0.97493500  | 3.41641200  |
| H  | -8.40158400 | 2.20507500  | 3.74213700  |
| Br | -5.14157500 | 2.96186900  | -1.30211900 |
| N  | -1.43673700 | 1.14855000  | -0.56103500 |
| C  | 1.13037600  | 0.04417700  | -0.13811000 |
| C  | -0.33715600 | 1.93142800  | -0.52312200 |
| C  | -1.28515500 | -0.21011700 | -0.37455300 |
| C  | 0.00054600  | -0.76171700 | -0.17187300 |
| C  | 0.93910900  | 1.44332600  | -0.31648700 |
| N  | -3.65142800 | -0.21949300 | -0.60653600 |
| C  | -3.85403800 | -3.00901400 | -0.27941300 |
| C  | -4.84620800 | -0.83417400 | -0.65249500 |
| C  | -2.52059100 | -0.97139200 | -0.40358000 |
| C  | -2.61976500 | -2.37340400 | -0.23952300 |
| C  | -5.00368800 | -2.20043400 | -0.49558900 |
| H  | -0.51503800 | 3.00012000  | -0.67276100 |

|   |             |             |             |
|---|-------------|-------------|-------------|
| H | 0.10638300  | -1.83949400 | -0.03613000 |
| H | 1.78764300  | 2.13053100  | -0.29576000 |
| H | -5.70475700 | -0.17691700 | -0.81941800 |
| H | -1.71623100 | -2.96410700 | -0.07912700 |
| H | -6.00041000 | -2.64452600 | -0.53793000 |
| C | -3.99416700 | -4.49675500 | -0.10296000 |
| H | -3.02112100 | -4.98599000 | 0.04915400  |
| H | -4.63647800 | -4.72965900 | 0.76334700  |
| H | -4.47599200 | -4.95299000 | -0.98434100 |
| C | 2.51010400  | -0.51465700 | 0.07923900  |
| H | 2.97467100  | -0.07668900 | 0.97929200  |
| H | 2.49559500  | -1.60786000 | 0.19844700  |
| H | 3.17260700  | -0.26945500 | -0.76839500 |

UM06/def2-TZVPP-CPCM(THF)//UB3LYP-D3/def2-SVP-CPCM(THF)

HF=-4887.712787

UB3LYP-D3/def2-TZVPP-CPCM(THF)//UB3LYP-D3/def2-SVP-CPCM(THF)

HF=-4888.5994182

### <sup>3</sup>F'-TS

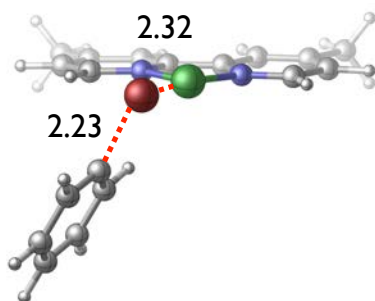

UB3LYP-D3/def2-SVP-CPCM(THF)

Zero-point correction= 0.301975 (Hartree/Particle)

Thermal correction to Energy= 0.323268

Thermal correction to Enthalpy= 0.324212

Thermal correction to Gibbs Free Energy= 0.246893

Sum of electronic and zero-point Energies= -4886.882832

Sum of electronic and thermal Energies= -4886.861540

Sum of electronic and thermal Enthalpies= -4886.860596

Sum of electronic and thermal Free Energies= -4886.937914

|    |             |             |             |
|----|-------------|-------------|-------------|
| Ni | -3.25263800 | 1.70106100  | -0.95983300 |
| C  | -6.35184300 | 2.70762400  | 0.47578100  |
| C  | -7.55100900 | 3.38369900  | 0.63666300  |
| C  | -5.83505700 | 1.82269900  | 1.40707900  |
| C  | -8.27458100 | 3.15564700  | 1.81877700  |
| H  | -7.92568500 | 4.07211900  | -0.12667200 |
| C  | -6.56771500 | 1.60345900  | 2.58285800  |
| H  | -4.88479500 | 1.31169300  | 1.21578400  |
| C  | -7.78363000 | 2.26932300  | 2.78604100  |
| H  | -9.22429000 | 3.67396400  | 1.98147500  |
| H  | -6.18755400 | 0.91068700  | 3.33952800  |
| H  | -8.35277500 | 2.09594900  | 3.70278900  |
| Br | -5.16984200 | 2.93988300  | -1.39971200 |
| N  | -1.44440100 | 1.16785800  | -0.57589000 |
| C  | 1.12337200  | 0.07844800  | -0.12970900 |
| C  | -0.34815200 | 1.95332000  | -0.55288900 |
| C  | -1.28934600 | -0.18483900 | -0.37268100 |
| C  | -0.00578600 | -0.73140600 | -0.15506900 |
| C  | 0.93004300  | 1.47088600  | -0.33441100 |
| N  | -3.64223100 | -0.21697000 | -0.71040900 |
| C  | -3.86427200 | -2.97683700 | -0.19545900 |
| C  | -4.83578800 | -0.83350300 | -0.75824100 |
| C  | -2.52536900 | -0.95129400 | -0.40433400 |
| C  | -2.63166100 | -2.33606400 | -0.14348800 |
| C  | -5.00027300 | -2.18742000 | -0.51776000 |
| H  | -0.52837500 | 3.01905900  | -0.71892100 |

|   |             |             |             |
|---|-------------|-------------|-------------|
| H | 0.10223800  | -1.80749000 | -0.00874000 |
| H | 1.77655600  | 2.16077100  | -0.32147800 |
| H | -5.68585400 | -0.18916700 | -1.00093400 |
| H | -1.73827800 | -2.90972000 | 0.10926100  |
| H | -5.99455300 | -2.63537700 | -0.57555400 |
| C | -4.01310800 | -4.44828300 | 0.08160900  |
| H | -3.04713800 | -4.92357100 | 0.30576000  |
| H | -4.68840300 | -4.61997400 | 0.93698100  |
| H | -4.46063000 | -4.96689600 | -0.78309200 |
| C | 2.50309700  | -0.47512700 | 0.10090000  |
| H | 2.48847200  | -1.56499400 | 0.24673500  |
| H | 3.16503000  | -0.25058400 | -0.75271500 |
| H | 2.96709300  | -0.01490200 | 0.98984600  |

UM06/def2-TZVPP-CPCM(THF)//UB3LYP-D3/def2-SVP-CPCM(THF)

HF=-4887.710583

UB3LYP-D3/def2-TZVPP-CPCM(THF)//UB3LYP-D3/def2-SVP-CPCM(THF)

HF=-4888.5980175

**<sup>1</sup>G**

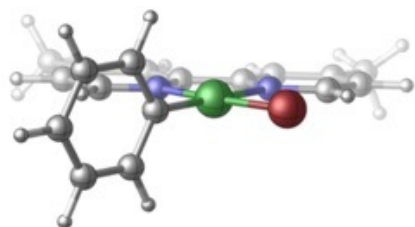

UB3LYP-D3/def2-SVP-CPCM(THF)

<S<sup>2</sup>> = 0.0000

Zero-point correction= 0.306236 (Hartree/Particle)

Thermal correction to Energy= 0.327471

Thermal correction to Enthalpy= 0.328416

Thermal correction to Gibbs Free Energy= 0.251298

Sum of electronic and zero-point Energies= -4886.979456

Sum of electronic and thermal Energies= -4886.958220

Sum of electronic and thermal Enthalpies= -4886.957276

Sum of electronic and thermal Free Energies= -4887.034393

|    |              |             |             |
|----|--------------|-------------|-------------|
| Ni | -4.62164100  | 0.37276900  | -0.35551800 |
| C  | -6.48961200  | 0.30741100  | -0.60607900 |
| C  | -7.09110200  | 0.71952100  | -1.80860200 |
| C  | -7.32438700  | -0.22393800 | 0.39359000  |
| C  | -8.47025500  | 0.58409600  | -2.01712600 |
| H  | -6.47263100  | 1.15269500  | -2.60117700 |
| C  | -8.70484800  | -0.36076100 | 0.19395800  |
| H  | -6.89063800  | -0.54663600 | 1.34577600  |
| C  | -9.28439000  | 0.04067100  | -1.01568600 |
| H  | -8.91247300  | 0.90753700  | -2.96479400 |
| H  | -9.33112800  | -0.78186000 | 0.98683500  |
| H  | -10.36102100 | -0.06552000 | -1.17536300 |
| Br | -4.86562300  | 2.59801700  | 0.38673300  |
| C  | -2.08305200  | -0.93380400 | -0.43222200 |
| C  | -0.71910400  | -1.20423500 | -0.28347300 |
| C  | 0.14074900   | -0.22825800 | 0.23592100  |
| C  | -0.43238600  | 1.00444300  | 0.58288700  |
| C  | -1.79853600  | 1.20493800  | 0.40952800  |
| C  | -3.06402100  | -1.89823600 | -0.97117700 |
| C  | -2.72086900  | -3.17719700 | -1.42003300 |
| C  | -3.69785200  | -4.04180700 | -1.92546000 |
| C  | -5.01382400  | -3.55700200 | -1.95217400 |
| C  | -5.29150600  | -2.27595300 | -1.49150600 |
| H  | -0.31683100  | -2.17600900 | -0.56937000 |
| H  | 0.18079400   | 1.81192400  | 0.98842400  |
| H  | -2.28181300  | 2.14944200  | 0.66877300  |
| H  | -1.68270700  | -3.50593000 | -1.37942800 |



|   |             |             |             |
|---|-------------|-------------|-------------|
| H | -5.83107600 | -4.17356900 | -2.33189100 |
| H | -6.30644800 | -1.88304700 | -1.50502500 |
| N | -2.61180200 | 0.26140400  | -0.08511500 |
| N | -4.34639000 | -1.44945200 | -1.00598000 |
| C | 1.60662000  | -0.49444200 | 0.43630000  |
| H | 1.81183200  | -0.69302500 | 1.50204700  |
| H | 1.94610500  | -1.36673200 | -0.14000000 |
| H | 2.21068100  | 0.37926600  | 0.14824900  |
| C | -3.36195400 | -5.41711900 | -2.42902400 |
| H | -3.53113800 | -5.47644100 | -3.51705900 |
| H | -2.31471700 | -5.68322400 | -2.22918800 |
| H | -4.01304700 | -6.17284000 | -1.96195100 |

UM06/def2-TZVPP-CPCM(THF)//UB3LYP-D3/def2-SVP-CPCM(THF)

HF=-4887.8048777

UB3LYP-D3/def2-TZVPP-CPCM(THF)//UB3LYP-D3/def2-SVP-CPCM(THF)

HF=-4888.6907597

**<sup>3</sup>G**

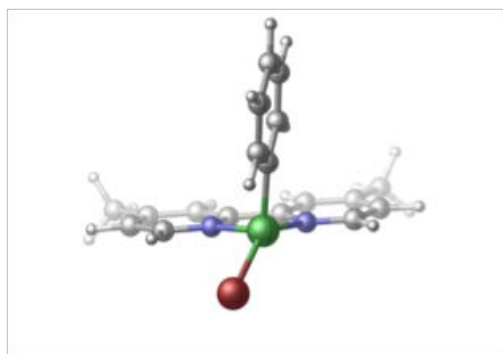

UB3LYP-D3/def2-SVP-CPCM(THF)

Zero-point correction= 0.305000 (Hartree/Particle)

Thermal correction to Energy= 0.326820

Thermal correction to Enthalpy= 0.327764

Thermal correction to Gibbs Free Energy= 0.248330

Sum of electronic and zero-point Energies= -4886.978664

Sum of electronic and thermal Energies= -4886.956844

Sum of electronic and thermal Enthalpies= -4886.955900

Sum of electronic and thermal Free Energies= -4887.035334

|    |             |             |             |
|----|-------------|-------------|-------------|
| C  | -1.73044200 | 0.93421700  | -0.63476400 |
| C  | -1.87312800 | 0.01418300  | 0.42272300  |
| C  | -3.09150000 | -0.69213400 | 0.48577300  |
| C  | -4.11710000 | -0.48980600 | -0.44888000 |
| C  | -3.94577100 | 0.43216300  | -1.48845600 |
| C  | -2.74396600 | 1.14515500  | -1.57994400 |
| Br | -0.88450500 | -2.21177200 | 3.23222000  |
| H  | -3.23786100 | -1.42479400 | 1.28704600  |
| H  | -0.80136700 | 1.50807000  | -0.73169700 |
| H  | -2.59751400 | 1.86676900  | -2.39048300 |
| H  | -4.74106900 | 0.59286600  | -2.22222600 |
| H  | -5.05158000 | -1.05493100 | -0.36868500 |
| C  | 2.01065800  | 0.06705500  | 0.27402200  |
| C  | 1.37737300  | -2.16886900 | 0.19169000  |
| C  | 2.45861300  | -2.49492100 | -0.62011900 |
| C  | 3.36180300  | -1.48973000 | -1.00624600 |
| C  | 3.11900900  | -0.19089800 | -0.54028200 |
| C  | 1.66580800  | 1.40468700  | 0.82149200  |
| C  | 0.17929400  | 2.58600300  | 2.15870500  |
| C  | 0.84043600  | 3.78607700  | 1.92081700  |
| C  | 1.97024400  | 3.79875800  | 1.08551300  |
| C  | 2.37512800  | 2.57640700  | 0.53376900  |
| H  | 0.65416600  | -2.91549900 | 0.52937300  |
| H  | 2.59867200  | -3.52731600 | -0.94686900 |
| H  | 3.80224600  | 0.61390500  | -0.81193400 |

|    |             |             |             |
|----|-------------|-------------|-------------|
| H  | -0.71171300 | 2.54155000  | 2.79011400  |
| H  | 0.47461800  | 4.70615700  | 2.38100800  |
| H  | 3.24287400  | 2.54531600  | -0.12525700 |
| N  | 1.16153900  | -0.92126200 | 0.62231300  |
| N  | 0.58416900  | 1.42588700  | 1.62949600  |
| Ni | -0.43901900 | -0.35359100 | 1.74233300  |
| C  | 2.69511000  | 5.08093000  | 0.78436100  |
| H  | 3.65064800  | 4.90126000  | 0.27232000  |
| H  | 2.07555700  | 5.72408100  | 0.13705800  |
| H  | 2.88953100  | 5.64723300  | 1.70840800  |
| C  | 4.53562400  | -1.80355900 | -1.89196600 |
| H  | 5.22460800  | -0.95168800 | -1.97632800 |
| H  | 5.09354100  | -2.67194100 | -1.50816100 |
| H  | 4.18856300  | -2.06632300 | -2.90518900 |

UM06/def2-TZVPP-CPCM(THF)//UB3LYP-D3/def2-SVP-CPCM(THF)

HF=-4887.7899161

UB3LYP-D3/def2-TZVPP-CPCM(THF)//UB3LYP-D3/def2-SVP-CPCM(THF)

HF=-4888.6853609

**<sup>1</sup>G'**

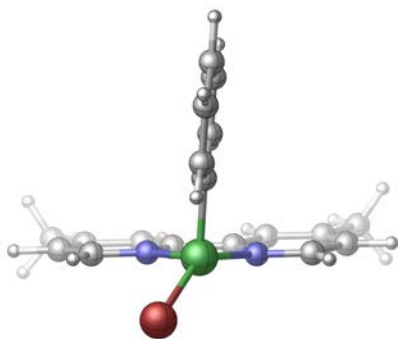

UB3LYP-D3/def2-SVP-CPCM(THF)

$\langle S^2 \rangle = 0.9508$  (before annihilation, 0.0349 after)

Zero-point correction= 0.304833 (Hartree/Particle)

Thermal correction to Energy= 0.326760

Thermal correction to Enthalpy= 0.327704

Thermal correction to Gibbs Free Energy= 0.247505

Sum of electronic and zero-point Energies= -4886.959643

Sum of electronic and thermal Energies= -4886.937717

Sum of electronic and thermal Enthalpies= -4886.936773

Sum of electronic and thermal Free Energies= -4887.016971

|    |             |             |             |
|----|-------------|-------------|-------------|
| Ni | 1.09190800  | 0.85609700  | -1.70045300 |
| C  | 2.38443500  | 0.71457900  | -0.24778600 |
| C  | 4.32361600  | 0.52823400  | 1.82293400  |
| C  | 2.00852900  | 0.65376700  | 1.10673000  |
| C  | 3.76251500  | 0.67514900  | -0.53491700 |
| C  | 4.72335100  | 0.58681800  | 0.48277100  |
| C  | 2.95825500  | 0.55992200  | 2.13304300  |
| H  | 0.94689300  | 0.67949200  | 1.37739800  |
| H  | 4.09105500  | 0.70806600  | -1.57887300 |
| H  | 5.78794100  | 0.56005200  | 0.22846600  |
| H  | 2.63351000  | 0.51232000  | 3.17757600  |
| N  | -0.25402700 | 2.12891000  | -0.78486400 |
| C  | -2.03722900 | 3.59640700  | 0.80378900  |
| C  | -0.08589800 | 3.44506300  | -0.61045800 |
| C  | -1.28901800 | 1.50693000  | -0.18117900 |
| C  | -2.19373900 | 2.21728500  | 0.61705300  |
| C  | -0.94786200 | 4.21283200  | 0.16501000  |
| N  | -0.34638900 | -0.47557600 | -1.12802500 |
| C  | -2.39020200 | -2.15220500 | -0.22052400 |
| C  | -0.31543500 | -1.78422300 | -1.40004300 |
| C  | -1.36863100 | 0.04049700  | -0.41723000 |
| C  | -2.40540200 | -0.77721600 | 0.04796700  |
| C  | -1.30952600 | -2.65450600 | -0.96577900 |
| H  | 0.77765700  | 3.88987600  | -1.11133800 |

|    |             |             |             |
|----|-------------|-------------|-------------|
| H  | -3.01999300 | 1.69972700  | 1.10459300  |
| H  | -0.76936800 | 5.28462200  | 0.27348500  |
| H  | 0.53822100  | -2.12410100 | -1.99223700 |
| H  | -3.23277300 | -0.34994300 | 0.61481500  |
| H  | -1.24475100 | -3.71689000 | -1.20969400 |
| Br | 1.96750300  | 0.21137900  | -3.84444000 |
| H  | 5.06948400  | 0.45680800  | 2.61980200  |
| C  | -3.48105700 | -3.06467300 | 0.26779900  |
| H  | -3.89910200 | -3.65146300 | -0.56545100 |
| H  | -3.07828400 | -3.78603900 | 0.99785100  |
| H  | -4.29730700 | -2.50768600 | 0.74835000  |
| C  | -2.98421500 | 4.39357400  | 1.65712600  |
| H  | -3.78647000 | 3.76897300  | 2.07386900  |
| H  | -2.44347800 | 4.86833200  | 2.49191800  |
| H  | -3.44307200 | 5.20520200  | 1.06971000  |

UM06/def2-TZVPP-CPCM(THF)//UB3LYP-D3/def2-SVP-CPCM(THF)  
HF=-4887.7735251  
UB3LYP-D3/def2-TZVPP-CPCM(THF)//UB3LYP-D3/def2-SVP-CPCM(THF)  
HF=-4888.6678698

### **<sup>1</sup>F'' (Ni-bromo species)**

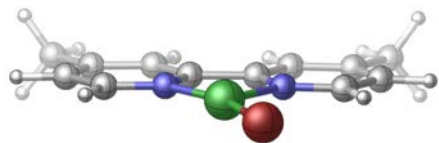

UB3LYP-D3/def2-SVP-CPCM(THF)

Zero-point correction= 0.214708 (Hartree/Particle)

Thermal correction to Energy= 0.230876

Thermal correction to Enthalpy= 0.231820

Thermal correction to Gibbs Free Energy= 0.166322

Sum of electronic and zero-point Energies= -4655.579462

Sum of electronic and thermal Energies= -4655.563294

Sum of electronic and thermal Enthalpies= -4655.562349

Sum of electronic and thermal Free Energies= -4655.627848

|    |             |             |             |
|----|-------------|-------------|-------------|
| Ni | -3.99183200 | 1.30009300  | -1.54653000 |
| C  | -1.87359800 | -0.39708200 | -0.83451100 |
| C  | -0.60463100 | -0.81497600 | -0.41773600 |
| C  | 0.38038200  | 0.12429500  | -0.09164500 |
| C  | 0.02971800  | 1.48282700  | -0.20377800 |
| C  | -1.24637600 | 1.83242200  | -0.62458000 |
| C  | -2.97912600 | -1.31121800 | -1.19958100 |
| C  | -2.90514100 | -2.70937500 | -1.17420400 |
| C  | -4.01531200 | -3.47922700 | -1.54213400 |
| C  | -5.17917400 | -2.78948900 | -1.92940000 |
| C  | -5.18373000 | -1.39947400 | -1.93172800 |
| H  | -0.37768600 | -1.87943400 | -0.34653600 |
| H  | 0.75171100  | 2.26661600  | 0.03582700  |
| H  | -1.54668200 | 2.87837300  | -0.72245500 |
| H  | -1.98301600 | -3.20525100 | -0.86858000 |
| H  | -6.07708900 | -3.33486700 | -2.22820500 |
| H  | -6.06484300 | -0.82279400 | -2.22618200 |
| N  | -2.18757800 | 0.92199600  | -0.93709400 |
| N  | -4.11313300 | -0.67488700 | -1.57617200 |
| C  | 1.75486100  | -0.28579000 | 0.36089600  |
| H  | 1.95781900  | 0.09097300  | 1.37696900  |
| H  | 1.87445700  | -1.37835300 | 0.36807700  |
| H  | 2.52660300  | 0.14347000  | -0.29878000 |
| C  | -3.97959500 | -4.98297800 | -1.52479800 |
| H  | -2.98906900 | -5.36658100 | -1.24261000 |
| H  | -4.71990400 | -5.37924000 | -0.81035300 |
| H  | -4.24149600 | -5.38984900 | -2.51492300 |
| Br | -5.83964900 | 2.56755300  | -2.20535500 |

UM06/def2-TZVPP-CPCM(THF)//UB3LYP-D3/def2-SVP-CPCM(THF)

HF=-4656.2756634

UB3LYP-D3/def2-TZVPP-CPCM(THF)//UB3LYP-D3/def2-SVP-CPCM(THF)  
HF=-4656.9610627

### **<sup>1</sup>F'' (phenyl radical)**

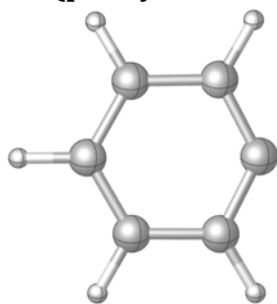

UB3LYP-D3/def2-SVP-CPCM(THF)

Zero-point correction= 0.087289 (Hartree/Particle)

Thermal correction to Energy= 0.091650

Thermal correction to Enthalpy= 0.092595

Thermal correction to Gibbs Free Energy= 0.059244

Sum of electronic and zero-point Energies= -231.315888

Sum of electronic and thermal Energies= -231.311527

Sum of electronic and thermal Enthalpies= -231.310583

Sum of electronic and thermal Free Energies= -231.343933

C -0.29103800 0.26151900 0.00004900

C 1.08781900 0.18926900 0.00053500

C 1.78056300 1.41499000 -0.00004200

C 1.07310400 2.62406400 -0.00104400

C -0.32767200 2.63227200 -0.00149100

C -1.04299800 1.41956500 -0.00093600

H 1.62938100 -0.76109600 0.00131300

H 2.87438700 1.41756800 0.00029600

H 1.61954800 3.57046000 -0.00149000

H -0.87218400 3.58094900 -0.00227600

H -2.13682400 1.41357900 -0.00127400

UM06/def2-TZVPP-CPCM(THF)//UB3LYP-D3/def2-SVP-CPCM(THF)

HF=-231.4580093

UB3LYP-D3/def2-TZVPP-CPCM(THF)//UB3LYP-D3/def2-SVP-CPCM(THF)

HF=-231.6566083



2J

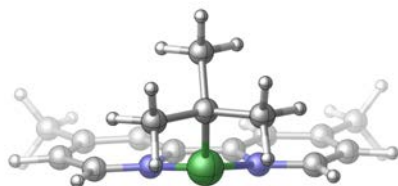

UB3LYP-D3/def2-SVP-CPCM(THF)

Zero-point correction= 0.331279 (Hartree/Particle)

Thermal correction to Energy= 0.351894

Thermal correction to Enthalpy= 0.352838

Thermal correction to Gibbs Free Energy= 0.280022

Sum of electronic and zero-point Energies= -2239.242341

Sum of electronic and thermal Energies= -2239.221726

Sum of electronic and thermal Enthalpies= -2239.220782

Sum of electronic and thermal Free Energies= -2239.293598

|    |             |             |             |
|----|-------------|-------------|-------------|
| Ni | -4.10779300 | 1.25373400  | -1.32019600 |
| C  | -5.28347400 | 2.10080600  | 0.03079000  |
| C  | -5.03401900 | 1.38406500  | 1.35564100  |
| H  | -5.25906000 | 0.30620400  | 1.28131900  |
| H  | -3.98154200 | 1.47642200  | 1.67430500  |
| H  | -5.66375000 | 1.79496700  | 2.17789100  |
| C  | -6.74299800 | 1.93257600  | -0.39703800 |
| H  | -6.94980400 | 2.42389700  | -1.36397600 |
| H  | -7.01521500 | 0.86793600  | -0.50344000 |
| H  | -7.44565000 | 2.37383100  | 0.34714100  |
| C  | -4.92890800 | 3.58415100  | 0.15262900  |
| H  | -3.87438700 | 3.72864900  | 0.44643000  |
| H  | -5.08315600 | 4.12523800  | -0.79738700 |
| H  | -5.55196400 | 4.09679500  | 0.92164600  |
| C  | -1.89191700 | -0.41456100 | -0.88502500 |
| C  | -0.61814100 | -0.81574800 | -0.41270300 |
| C  | 0.35899600  | 0.12005500  | -0.11030600 |
| C  | 0.02631300  | 1.49591800  | -0.28126800 |
| C  | -1.23753900 | 1.83555500  | -0.71914600 |
| C  | -2.96893100 | -1.31088500 | -1.24418800 |
| C  | -2.91389500 | -2.72433300 | -1.16927600 |
| C  | -3.99501600 | -3.50287200 | -1.55282100 |
| C  | -5.16206000 | -2.82501300 | -2.01248100 |
| C  | -5.17490100 | -1.44531200 | -2.04011900 |
| H  | -0.40127800 | -1.87823200 | -0.28847900 |
| H  | 0.75671600  | 2.27789200  | -0.06274800 |
| H  | -1.53394200 | 2.88224600  | -0.83746600 |
| H  | -2.00592900 | -3.20789700 | -0.80444100 |
| H  | -6.04307800 | -3.38544700 | -2.33253800 |

|   |             |             |             |
|---|-------------|-------------|-------------|
| H | -6.06335400 | -0.89367900 | -2.36210800 |
| N | -2.18708600 | 0.92479600  | -1.02438100 |
| N | -4.11948700 | -0.68522600 | -1.67555800 |
| C | 1.72370800  | -0.27320800 | 0.38598300  |
| H | 1.91667200  | 0.15250000  | 1.38561100  |
| H | 1.83814000  | -1.36510800 | 0.45040600  |
| H | 2.51186200  | 0.11755900  | -0.28004500 |
| C | -3.96763700 | -5.00572600 | -1.48791700 |
| H | -2.99793700 | -5.38363700 | -1.13244600 |
| H | -4.75292300 | -5.38446500 | -0.81138900 |
| H | -4.16727900 | -5.44621100 | -2.47965200 |

UM06/def2-TZVPP-CPCM(THF)//UB3LYP-D3/def2-SVP-CPCM(THF)  
HF=-2239.8687984  
UB3LYP-D3/def2-TZVPP-CPCM(THF)//UB3LYP-D3/def2-SVP-CPCM(THF)  
HF=-2240.5868708

4J

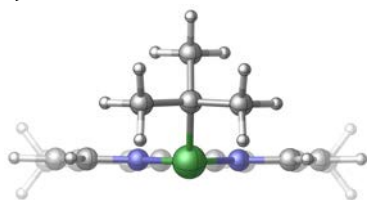

UB3LYP-D3/def2-SVP-CPCM(THF)

Zero-point correction= 0.331122 (Hartree/Particle)

Thermal correction to Energy= 0.351753

Thermal correction to Enthalpy= 0.352697

Thermal correction to Gibbs Free Energy= 0.279075

Sum of electronic and zero-point Energies= -2239.236155

Sum of electronic and thermal Energies= -2239.215524

Sum of electronic and thermal Enthalpies= -2239.214580

Sum of electronic and thermal Free Energies= -2239.288203

|    |             |             |             |
|----|-------------|-------------|-------------|
| Ni | -4.11364400 | 1.25171300  | -1.35136700 |
| C  | -5.30943000 | 2.15278900  | -0.05189500 |
| C  | -5.12379100 | 1.41771900  | 1.27095000  |
| H  | -5.39083100 | 0.35173000  | 1.17915700  |
| H  | -4.07610200 | 1.46491900  | 1.61216600  |
| H  | -5.75620800 | 1.85139700  | 2.07662700  |
| C  | -6.75210500 | 2.03935200  | -0.54491100 |
| H  | -6.89621400 | 2.53596100  | -1.51987700 |
| H  | -7.06181300 | 0.98624900  | -0.65716300 |
| H  | -7.46358700 | 2.51074500  | 0.16894000  |
| C  | -4.88469300 | 3.61585700  | 0.07013500  |
| H  | -3.83618700 | 3.70884700  | 0.40156800  |
| H  | -4.98128000 | 4.15545000  | -0.88780900 |
| H  | -5.50788100 | 4.15995300  | 0.81427700  |
| C  | -1.91951800 | -0.43473700 | -0.77691700 |
| C  | -0.59133900 | -0.83128600 | -0.44384100 |
| C  | 0.37256900  | 0.10003800  | -0.10652300 |
| C  | -0.00177800 | 1.48126100  | -0.10583800 |
| C  | -1.29654900 | 1.81858100  | -0.45309700 |
| C  | -2.98536800 | -1.32921200 | -1.12487800 |
| C  | -2.87841100 | -2.74941200 | -1.18917800 |
| C  | -3.96492000 | -3.53686600 | -1.52063800 |
| C  | -5.20546100 | -2.88212200 | -1.80354600 |
| C  | -5.25574700 | -1.50197000 | -1.74635900 |
| H  | -0.33246100 | -1.89167700 | -0.45113800 |
| H  | 0.71715700  | 2.25835400  | 0.16045200  |
| H  | -1.61984100 | 2.86445500  | -0.47338200 |
| H  | -1.92065000 | -3.22417300 | -0.96819200 |
| H  | -6.09774700 | -3.45525900 | -2.06244500 |

|   |             |             |             |
|---|-------------|-------------|-------------|
| H | -6.18319900 | -0.96266000 | -1.96463600 |
| N | -2.23720000 | 0.91623900  | -0.78353100 |
| N | -4.20098500 | -0.73186300 | -1.42625700 |
| C | 1.77899500  | -0.29547500 | 0.25316800  |
| H | 2.03975500  | 0.05842200  | 1.26556500  |
| H | 1.92119900  | -1.38575800 | 0.22253200  |
| H | 2.50625700  | 0.16658900  | -0.43672600 |
| C | -3.87769300 | -5.03726600 | -1.58960400 |
| H | -2.86973500 | -5.40369900 | -1.34554800 |
| H | -4.59329800 | -5.50453600 | -0.89112100 |
| H | -4.14191300 | -5.40041900 | -2.59786800 |

UM06/def2-TZVPP-CPCM(THF)//UB3LYP-D3/def2-SVP-CPCM(THF)  
HF=-2239.8575927  
UB3LYP-D3/def2-TZVPP-CPCM(THF)//UB3LYP-D3/def2-SVP-CPCM(THF)  
HF=-2240.5786207

## <sup>2</sup>K-TS

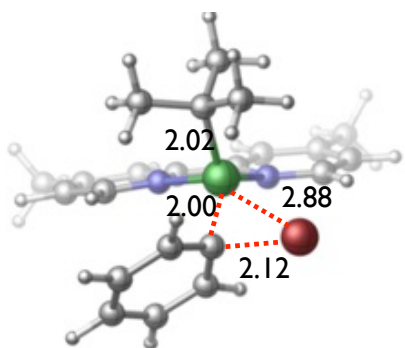

UB3LYP-D3/def2-SVP-CPCM(THF)

Zero-point correction= 0.422956 (Hartree/Particle)

Thermal correction to Energy= 0.450436

Thermal correction to Enthalpy= 0.451380

Thermal correction to Gibbs Free Energy= 0.361910

Sum of electronic and zero-point Energies= -5044.524684

Sum of electronic and thermal Energies= -5044.497204

Sum of electronic and thermal Enthalpies= -5044.496260

Sum of electronic and thermal Free Energies= -5044.585730

|    |             |             |             |
|----|-------------|-------------|-------------|
| Ni | -0.56887500 | -0.10884500 | 0.03179700  |
| C  | -2.00773300 | 0.73061800  | -1.07367400 |
| C  | -1.81809100 | 3.47023400  | -1.69584400 |
| C  | -2.92075100 | 1.65519000  | -0.50062400 |
| C  | -1.11674800 | 1.17633300  | -2.09208400 |
| C  | -1.00348100 | 2.54641200  | -2.35490100 |
| C  | -2.78829100 | 3.00870100  | -0.78061000 |
| H  | -3.67843900 | 1.30166500  | 0.19970900  |
| H  | -0.51865100 | 0.45366200  | -2.64898900 |
| H  | -0.27773300 | 2.88665100  | -3.09898500 |
| H  | -3.44890000 | 3.72264300  | -0.28033800 |
| N  | 0.96824900  | 1.25462800  | 0.18035100  |
| C  | 3.21273000  | 2.93003500  | 0.37307900  |
| C  | 0.83008500  | 2.54873000  | 0.50132000  |
| C  | 2.20297300  | 0.76608600  | -0.07367600 |
| C  | 3.34015400  | 1.58115100  | 0.02500900  |
| C  | 1.91223300  | 3.41398800  | 0.60596400  |
| N  | 1.02235400  | -1.20962300 | -0.72080700 |
| C  | 3.36186200  | -2.72388100 | -1.08916100 |
| C  | 0.95766700  | -2.48795200 | -1.12680000 |
| C  | 2.23627000  | -0.65439000 | -0.49338800 |
| C  | 3.41657000  | -1.39275300 | -0.66507600 |
| C  | 2.08643100  | -3.27123000 | -1.32808200 |
| H  | -0.19249800 | 2.89070500  | 0.66852000  |
| H  | 4.32833000  | 1.17240700  | -0.18817700 |

|    |             |             |             |
|----|-------------|-------------|-------------|
| H  | 1.74447000  | 4.46123100  | 0.86657200  |
| H  | -0.04933300 | -2.87875200 | -1.29817400 |
| H  | 4.38455800  | -0.93335800 | -0.46190100 |
| H  | 1.97710300  | -4.30344700 | -1.66790300 |
| Br | -2.75469400 | -1.21241800 | -1.48193200 |
| C  | -1.25942500 | -0.30913100 | 1.91997700  |
| H  | -1.73267300 | 4.53737400  | -1.91319300 |
| C  | 4.60421000  | -3.55062400 | -1.27741800 |
| H  | 5.51773900  | -2.95597000 | -1.13619400 |
| H  | 4.62398100  | -4.38736500 | -0.55940500 |
| H  | 4.62857200  | -3.99435000 | -2.28578400 |
| C  | 4.40757900  | 3.83624900  | 0.49373300  |
| H  | 4.53584500  | 4.16752900  | 1.53775800  |
| H  | 5.33438400  | 3.33736200  | 0.17694300  |
| H  | 4.27328200  | 4.74427900  | -0.11569700 |
| C  | -0.10593600 | -1.08166100 | 2.57143300  |
| H  | -0.28871200 | -1.26294300 | 3.65582700  |
| H  | 0.04439400  | -2.07046200 | 2.10401900  |
| H  | 0.85066700  | -0.53464100 | 2.49801600  |
| C  | -2.54257900 | -1.12746400 | 2.00560400  |
| H  | -3.39265400 | -0.61222000 | 1.52877500  |
| H  | -2.44129500 | -2.10488300 | 1.50598200  |
| H  | -2.83192800 | -1.32398200 | 3.06326500  |
| C  | -1.44613300 | 1.02819800  | 2.62310500  |
| H  | -0.50872100 | 1.60684200  | 2.65959400  |
| H  | -2.20175500 | 1.65594800  | 2.12145600  |
| H  | -1.78013400 | 0.89735600  | 3.67747900  |

UM06/def2-TZVPP-CPCM(THF)//UB3LYP-D3/def2-SVP-CPCM(THF)  
HF=-5045.4850601  
UB3LYP-D3/def2-TZVPP-CPCM(THF)//UB3LYP-D3/def2-SVP-CPCM(THF)  
HF=-5046.5185177

<sup>2</sup>H

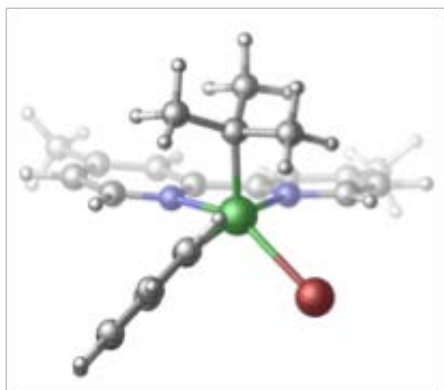

UB3LYP-D3/def2-SVP-CPCM(THF)

Zero-point correction= 0.427053 (Hartree/Particle)

Thermal correction to Energy= 0.454642

Thermal correction to Enthalpy= 0.455586

Thermal correction to Gibbs Free Energy= 0.366581

Sum of electronic and zero-point Energies= -5044.574659

Sum of electronic and thermal Energies= -5044.547070

Sum of electronic and thermal Enthalpies= -5044.546126

Sum of electronic and thermal Free Energies= -5044.635131

|    |             |             |             |
|----|-------------|-------------|-------------|
| Ni | -0.56337000 | -0.04631900 | 0.09841600  |
| C  | -1.85804600 | 1.35728300  | -0.24505500 |
| C  | -3.52873200 | 3.40894600  | -1.28522000 |
| C  | -3.21390200 | 1.44004700  | 0.10238600  |
| C  | -1.36915700 | 2.30647500  | -1.16099100 |
| C  | -2.18768500 | 3.32555400  | -1.66969900 |
| C  | -4.04026600 | 2.45236000  | -0.40091300 |
| H  | -3.65663600 | 0.70026200  | 0.77209900  |
| H  | -0.33487500 | 2.25428800  | -1.51272900 |
| H  | -1.77097400 | 4.05105900  | -2.37504500 |
| H  | -5.09288800 | 2.48722500  | -0.10395600 |
| N  | 1.18278400  | 1.17021700  | 0.40025100  |
| C  | 3.58866200  | 2.49028000  | 1.00364600  |
| C  | 1.18840300  | 2.46208000  | 0.75018400  |
| C  | 2.35080400  | 0.49932700  | 0.36745100  |
| C  | 3.56597200  | 1.13467400  | 0.65549500  |
| C  | 2.35389800  | 3.15589100  | 1.05841300  |
| N  | 0.98567200  | -1.44060000 | 0.01814400  |
| C  | 3.18735400  | -3.15570700 | -0.31343600 |
| C  | 0.81036500  | -2.75503700 | -0.17462800 |
| C  | 2.24156800  | -0.95071800 | 0.06963400  |
| C  | 3.35492100  | -1.78141500 | -0.10891200 |
| C  | 1.87055000  | -3.64127200 | -0.32900300 |
| H  | 0.21530000  | 2.95470900  | 0.77867800  |

|    |             |             |             |
|----|-------------|-------------|-------------|
| H  | 4.50024400  | 0.57419700  | 0.62972700  |
| H  | 2.29688100  | 4.20930500  | 1.34012000  |
| H  | -0.22492700 | -3.09449300 | -0.22423700 |
| H  | 4.36042800  | -1.36177600 | -0.09062700 |
| H  | 1.66697900  | -4.70462200 | -0.47039500 |
| Br | -1.71056300 | -1.32864000 | -1.79047600 |
| C  | -1.01599900 | -0.24129500 | 2.08666000  |
| H  | -4.17092500 | 4.20206200  | -1.67755800 |
| C  | 4.35962500  | -4.07147500 | -0.52983600 |
| H  | 5.30517400  | -3.60717500 | -0.21595500 |
| H  | 4.22852600  | -5.01710600 | 0.01787800  |
| H  | 4.44652500  | -4.32663800 | -1.59967900 |
| C  | 4.87320000  | 3.21007200  | 1.30667700  |
| H  | 4.79438000  | 3.77049200  | 2.25134900  |
| H  | 5.72470600  | 2.51890000  | 1.37659300  |
| H  | 5.09240900  | 3.94510400  | 0.51426800  |
| C  | 0.22707200  | -0.77930600 | 2.79634400  |
| H  | -0.00940400 | -0.91046400 | 3.87057900  |
| H  | 0.55316300  | -1.75566600 | 2.41804000  |
| H  | 1.07501900  | -0.08110100 | 2.74214300  |
| C  | -2.10117100 | -1.30721300 | 2.02841900  |
| H  | -2.99088000 | -0.97953000 | 1.47438100  |
| H  | -1.73718700 | -2.23009000 | 1.55095900  |
| H  | -2.42666400 | -1.57395900 | 3.05447600  |
| C  | -1.45739800 | 1.03009500  | 2.80018200  |
| H  | -0.67484600 | 1.80304400  | 2.75646200  |
| H  | -2.38075100 | 1.46045700  | 2.39947000  |
| H  | -1.63209800 | 0.80641000  | 3.87152200  |

UM06/def2-TZVPP-CPCM(THF)//UB3LYP-D3/def2-SVP-CPCM(THF)  
HF=-5045.5318625  
UB3LYP-D3/def2-TZVPP-CPCM(THF)//UB3LYP-D3/def2-SVP-CPCM(THF)  
HF=-5046.574292



## <sup>2</sup>H-TS

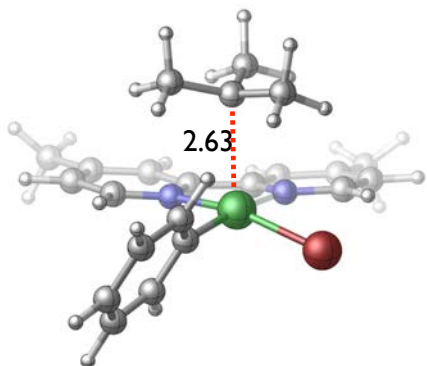

UB3LYP-D3/def2-SVP-CPCM(THF)

Zero-point correction= 0.425172 (Hartree/Particle)

Thermal correction to Energy= 0.452637

Thermal correction to Enthalpy= 0.453581

Thermal correction to Gibbs Free Energy= 0.364426

Sum of electronic and zero-point Energies= -5044.568901

Sum of electronic and thermal Energies= -5044.541436

Sum of electronic and thermal Enthalpies= -5044.540492

Sum of electronic and thermal Free Energies= -5044.629648

|    |             |             |             |
|----|-------------|-------------|-------------|
| Ni | -0.46974300 | 0.02068700  | -0.41675500 |
| C  | -1.67999300 | 1.47643000  | -0.71360400 |
| C  | -3.33826900 | 3.67087900  | -1.45007500 |
| C  | -2.93718800 | 1.67823500  | -0.11874800 |
| C  | -1.29229400 | 2.39258900  | -1.71215700 |
| C  | -2.10400800 | 3.47523700  | -2.07868300 |
| C  | -3.75171000 | 2.76341500  | -0.46731700 |
| H  | -3.30482800 | 0.96789700  | 0.62514800  |
| H  | -0.32764400 | 2.26819500  | -2.21592700 |
| H  | -1.76874500 | 4.16777600  | -2.85720600 |
| H  | -4.72066300 | 2.89393800  | 0.02480100  |
| N  | 1.12230200  | 1.19482600  | 0.05908800  |
| C  | 3.44215700  | 2.57769300  | 0.86492300  |
| C  | 1.07213100  | 2.49079000  | 0.40411800  |
| C  | 2.31387300  | 0.55519600  | 0.12799900  |
| C  | 3.48031900  | 1.22225200  | 0.51855700  |
| C  | 2.19097300  | 3.20998100  | 0.80897500  |
| N  | 1.02820200  | -1.38687300 | -0.39265100 |
| C  | 3.26845500  | -3.08892800 | -0.43383200 |
| C  | 0.88870200  | -2.70292700 | -0.60348100 |
| C  | 2.26766600  | -0.89109600 | -0.17997300 |
| C  | 3.39905200  | -1.71348400 | -0.20709000 |
| C  | 1.96801900  | -3.58059600 | -0.62304700 |
| H  | 0.09083200  | 2.95996400  | 0.35015300  |

|    |             |             |             |
|----|-------------|-------------|-------------|
| H  | 4.42582100  | 0.68308600  | 0.57120700  |
| H  | 2.08068200  | 4.26147400  | 1.08174800  |
| H  | -0.13439700 | -3.04380200 | -0.77330200 |
| H  | 4.38996300  | -1.28850400 | -0.04812700 |
| H  | 1.79076100  | -4.64487400 | -0.79103100 |
| Br | -2.06051700 | -1.42111000 | -1.56489200 |
| C  | -0.76489300 | -0.35275700 | 2.17087200  |
| H  | -3.97441700 | 4.51618300  | -1.72696000 |
| C  | 4.46631600  | -3.99507300 | -0.49511200 |
| H  | 5.33972900  | -3.55120300 | 0.00358500  |
| H  | 4.25037000  | -4.97063000 | -0.03427000 |
| H  | 4.74108900  | -4.18581400 | -1.54668100 |
| C  | 4.68127100  | 3.32656200  | 1.26822300  |
| H  | 4.47905600  | 3.99892200  | 2.11576100  |
| H  | 5.49923900  | 2.64542300  | 1.54252400  |
| H  | 5.03122800  | 3.95568200  | 0.43210800  |
| C  | 0.50842700  | -0.98541500 | 2.66028000  |
| H  | 0.42913300  | -1.17567500 | 3.75235700  |
| H  | 0.71453000  | -1.95213600 | 2.17918200  |
| H  | 1.38256900  | -0.32989800 | 2.52195900  |
| C  | -1.93737800 | -1.28175200 | 2.04413200  |
| H  | -2.79048300 | -0.81209200 | 1.53520400  |
| H  | -1.67886300 | -2.18943100 | 1.47926000  |
| H  | -2.28243400 | -1.59901300 | 3.05304200  |
| C  | -1.03843600 | 1.00820600  | 2.74490500  |
| H  | -0.15733500 | 1.66519500  | 2.67936800  |
| H  | -1.88232000 | 1.51224100  | 2.25590000  |
| H  | -1.28787500 | 0.91589500  | 3.82446800  |

UM06/def2-TZVPP-CPCM(THF)//UB3LYP-D3/def2-SVP-CPCM(THF)  
HF=-5045.5308871  
UB3LYP-D3/def2-TZVPP-CPCM(THF)//UB3LYP-D3/def2-SVP-CPCM(THF)  
HF=-5046.5693344

**<sup>2</sup>H'**

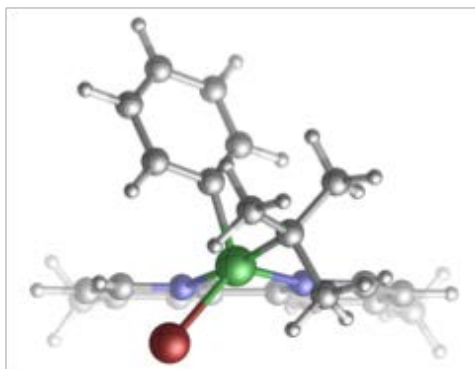

UB3LYP-D3/def2-SVP-CPCM(THF)

Zero-point correction= 0.427088 (Hartree/Particle)  
Thermal correction to Energy= 0.454746  
Thermal correction to Enthalpy= 0.455691  
Thermal correction to Gibbs Free Energy= 0.366759  
Sum of electronic and zero-point Energies= -5044.582270  
Sum of electronic and thermal Energies= -5044.554611  
Sum of electronic and thermal Enthalpies= -5044.553667  
Sum of electronic and thermal Free Energies= -5044.642599

|   |             |             |             |
|---|-------------|-------------|-------------|
| C | 2.72335600  | 0.70789700  | 0.18970800  |
| C | 3.75298800  | -0.41261300 | 0.27880000  |
| C | 2.97297200  | 1.55139000  | -1.06760500 |
| H | 3.70918900  | -1.07763500 | -0.59404700 |
| H | 3.61723800  | -1.01751200 | 1.18615500  |
| H | 3.11295700  | 0.91777900  | -1.95212800 |
| H | 2.16471200  | 2.26014100  | -1.30123400 |
| C | -1.70961900 | 1.57648700  | -0.04686300 |
| C | -2.65033500 | 2.60378800  | 0.11017800  |
| C | -2.24023100 | 3.93516500  | 0.23146300  |
| C | -0.85950600 | 4.17639400  | 0.18311300  |
| C | 0.01525300  | 3.10655200  | 0.02942200  |
| C | -2.10728300 | 0.15486800  | -0.20310600 |
| C | -3.43402400 | -0.28925800 | -0.10788500 |
| C | -3.73664600 | -1.64641600 | -0.26159800 |
| C | -2.66328500 | -2.51620700 | -0.51343200 |
| C | -1.37323800 | -2.00530300 | -0.59468700 |
| H | -3.71474700 | 2.37279300  | 0.12957800  |
| H | -0.46145000 | 5.18998600  | 0.26278000  |
| H | 1.08852400  | 3.28660900  | -0.00950700 |
| H | -4.23973900 | 0.41575000  | 0.09379700  |
| H | -2.82910800 | -3.58791500 | -0.64141200 |
| H | -0.51253300 | -2.64608700 | -0.79182700 |
| N | -0.38202400 | 1.83068500  | -0.07700800 |
| N | -1.10205500 | -0.70319200 | -0.44673700 |

|    |             |             |             |
|----|-------------|-------------|-------------|
| Br | 1.50064300  | -1.34350900 | -2.30830600 |
| Ni | 0.86324300  | 0.01931200  | -0.25483600 |
| C  | 0.82842000  | -0.73700000 | 1.51091600  |
| C  | 0.23013700  | -0.08929800 | 2.59837300  |
| C  | 1.21218600  | -2.07747200 | 1.64691200  |
| C  | 0.02519700  | -0.76720800 | 3.80788300  |
| H  | -0.07727800 | 0.95631400  | 2.50930000  |
| C  | 1.00946900  | -2.75990800 | 2.85462700  |
| H  | 1.67143400  | -2.59586100 | 0.79964700  |
| H  | -0.44213800 | -0.24725900 | 4.64978200  |
| H  | 1.31577900  | -3.80640300 | 2.94602500  |
| C  | 0.41579000  | -2.10526800 | 3.94016600  |
| H  | 0.25773600  | -2.63455900 | 4.88374000  |
| C  | -3.22289900 | 5.06030200  | 0.39531800  |
| H  | -3.13734000 | 5.77041300  | -0.44331400 |
| H  | -4.25907000 | 4.69732800  | 0.43832600  |
| H  | -3.01158100 | 5.62624400  | 1.31685800  |
| C  | -5.14604400 | -2.16100000 | -0.16329600 |
| H  | -5.45402400 | -2.62397900 | -1.11504700 |
| H  | -5.22023800 | -2.94123900 | 0.61121900  |
| H  | -5.85899800 | -1.36057200 | 0.07871800  |
| H  | 4.76852300  | 0.02874600  | 0.32310300  |
| H  | 3.89106400  | 2.15487300  | -0.92408400 |
| C  | 2.77608100  | 1.55777200  | 1.45779800  |
| H  | 1.92937700  | 2.24961100  | 1.55717100  |
| H  | 2.78584400  | 0.93211000  | 2.36012000  |
| H  | 3.70125000  | 2.16594700  | 1.45988300  |

UM06/def2-TZVPP-CPCM(THF)//UB3LYP-D3/def2-SVP-CPCM(THF)  
HF=-5045.5387051  
UB3LYP-D3/def2-TZVPP-CPCM(THF)//UB3LYP-D3/def2-SVP-CPCM(THF)  
HF=-5046.5811753

## 2I-TS

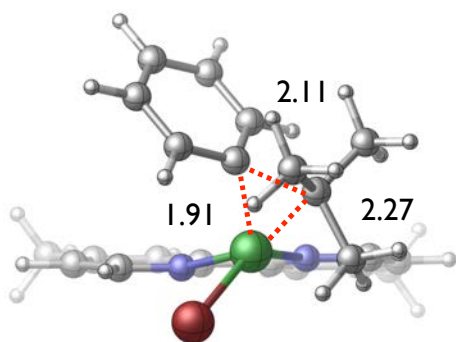

UB3LYP-D3/def2-SVP-CPCM(THF)

|                                              |                             |  |  |
|----------------------------------------------|-----------------------------|--|--|
| Zero-point correction=                       | 0.426807 (Hartree/Particle) |  |  |
| Thermal correction to Energy=                | 0.453769                    |  |  |
| Thermal correction to Enthalpy=              | 0.454713                    |  |  |
| Thermal correction to Gibbs Free Energy=     | 0.366959                    |  |  |
| Sum of electronic and zero-point Energies=   | -5044.567409                |  |  |
| Sum of electronic and thermal Energies=      | -5044.540447                |  |  |
| Sum of electronic and thermal Enthalpies=    | -5044.539502                |  |  |
| Sum of electronic and thermal Free Energies= | -5044.627257                |  |  |

|   |             |             |             |
|---|-------------|-------------|-------------|
| C | 2.47756700  | 0.52963500  | 0.50619500  |
| C | 3.59074200  | -0.50541300 | 0.62937500  |
| C | 2.69296100  | 1.27633000  | -0.83597600 |
| H | 3.50650100  | -1.27055700 | -0.15537000 |
| H | 3.59625100  | -0.99952600 | 1.61104300  |
| H | 2.89116500  | 0.58777800  | -1.66519700 |
| H | 1.87756200  | 1.94478300  | -1.14710300 |
| C | -2.00954800 | 1.50230600  | -0.13993600 |
| C | -2.94484600 | 2.52885500  | 0.05036000  |
| C | -2.53057300 | 3.85937000  | 0.16696800  |
| C | -1.15101300 | 4.10093700  | 0.08094300  |
| C | -0.28187800 | 3.03329200  | -0.11364300 |
| C | -2.40652900 | 0.07676900  | -0.26387500 |
| C | -3.70782000 | -0.38689300 | -0.02447700 |
| C | -4.00335400 | -1.74934200 | -0.14650300 |
| C | -2.94968800 | -2.60226100 | -0.51360000 |
| C | -1.68261200 | -2.07229100 | -0.73146100 |
| H | -4.00836400 | 2.29638700  | 0.09838000  |
| H | -0.75091100 | 5.11370200  | 0.16189500  |
| H | 0.79136600  | 3.21327800  | -0.18329100 |
| H | -4.49584300 | 0.30491700  | 0.27245700  |
| H | -3.11289100 | -3.67649700 | -0.62411400 |
| H | -0.83301300 | -2.69688500 | -1.01558600 |
| N | -0.68378500 | 1.75827400  | -0.22123600 |
| N | -1.41708500 | -0.76567600 | -0.61231500 |

|    |             |             |             |
|----|-------------|-------------|-------------|
| Br | 1.40168200  | -1.60311700 | -2.29320600 |
| Ni | 0.51705700  | -0.02284900 | -0.48947000 |
| C  | 0.89376300  | -0.62924200 | 1.28296600  |
| C  | 0.15210500  | -0.03739800 | 2.32491800  |
| C  | 1.14006200  | -2.01494600 | 1.35357400  |
| C  | -0.36135300 | -0.80750500 | 3.37237100  |
| H  | -0.05846300 | 1.03243100  | 2.30102800  |
| C  | 0.62738700  | -2.78433700 | 2.40279400  |
| H  | 1.69961200  | -2.49969600 | 0.55288600  |
| H  | -0.95334000 | -0.32388900 | 4.15510200  |
| H  | 0.81577700  | -3.86192800 | 2.42004200  |
| C  | -0.12792600 | -2.18770600 | 3.41948900  |
| H  | -0.52755500 | -2.78946600 | 4.23983300  |
| C  | -3.50767800 | 4.98413300  | 0.36577100  |
| H  | -3.45621400 | 5.69224200  | -0.47742700 |
| H  | -4.54096600 | 4.61980500  | 0.44926900  |
| H  | -3.26263800 | 5.55310700  | 1.27705300  |
| C  | -5.38404000 | -2.28838400 | 0.10891100  |
| H  | -5.77387800 | -2.79393300 | -0.78952600 |
| H  | -5.36298100 | -3.03958400 | 0.91507700  |
| H  | -6.08872000 | -1.49437900 | 0.39309300  |
| H  | 4.56567300  | 0.00058500  | 0.50057000  |
| H  | 3.58393500  | 1.92378900  | -0.71775000 |
| C  | 2.55206500  | 1.54057900  | 1.64884500  |
| H  | 1.72780400  | 2.26708000  | 1.62507400  |
| H  | 2.54372100  | 1.05494100  | 2.63426500  |
| H  | 3.49408500  | 2.11235900  | 1.56275600  |

UM06/def2-TZVPP-CPCM(THF)//UB3LYP-D3/def2-SVP-CPCM(THF)  
HF=-5045.5303702  
UB3LYP-D3/def2-TZVPP-CPCM(THF)//UB3LYP-D3/def2-SVP-CPCM(THF)  
HF=-5046.5662454

## 2I-TS

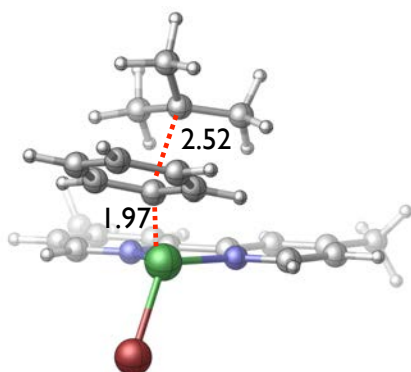

UB3LYP-D3/def2-SVP-CPCM(THF)

Zero-point correction= 0.422563 (Hartree/Particle)

Thermal correction to Energy= 0.451102

Thermal correction to Enthalpy= 0.452046

Thermal correction to Gibbs Free Energy= 0.358259

Sum of electronic and zero-point Energies= -5044.535437

Sum of electronic and thermal Energies= -5044.506898

Sum of electronic and thermal Enthalpies= -5044.505954

Sum of electronic and thermal Free Energies= -5044.599741

|    |             |             |             |
|----|-------------|-------------|-------------|
| Ni | 1.15698000  | 0.80313900  | -0.58477500 |
| C  | 2.32848100  | 0.33814200  | 0.92428500  |
| C  | 5.11920600  | 0.20086500  | 1.49479100  |
| C  | 3.04155200  | 1.45126300  | 1.43037300  |
| C  | 3.07877700  | -0.84127500 | 0.69778300  |
| C  | 4.44572700  | -0.91665100 | 0.98020600  |
| C  | 4.40990400  | 1.38942900  | 1.71551000  |
| H  | 2.50862100  | 2.39036600  | 1.62008700  |
| H  | 2.57443100  | -1.73002300 | 0.30029100  |
| H  | 4.99329200  | -1.84687500 | 0.79755300  |
| H  | 4.92832600  | 2.26924700  | 2.11004400  |
| N  | -0.40671000 | 1.93537300  | 0.04765400  |
| C  | -2.69659900 | 3.26224200  | 0.96611900  |
| C  | -0.33012700 | 3.19445800  | 0.49328600  |
| C  | -1.60084200 | 1.30443100  | 0.03778200  |
| C  | -2.75851900 | 1.94552700  | 0.49241800  |
| C  | -1.43981300 | 3.89018500  | 0.96037900  |
| N  | -0.34382800 | -0.53554700 | -0.82382800 |
| C  | -2.55499400 | -2.24308600 | -1.00356100 |
| C  | -0.20010200 | -1.78530500 | -1.27722900 |
| C  | -1.56646500 | -0.09342900 | -0.46128400 |
| C  | -2.68807300 | -0.92631400 | -0.54461700 |
| C  | -1.26934200 | -2.66854900 | -1.37809500 |
| H  | 0.66285300  | 3.65020900  | 0.47535400  |

|    |             |             |             |
|----|-------------|-------------|-------------|
| H  | -3.71494700 | 1.42282200  | 0.48486800  |
| H  | -1.32455100 | 4.91485400  | 1.31930300  |
| H  | 0.81230000  | -2.07394900 | -1.57021900 |
| H  | -3.67063500 | -0.55699600 | -0.25052300 |
| H  | -1.10182100 | -3.68134400 | -1.74991400 |
| Br | 2.04109800  | 1.26858800  | -2.81423400 |
| C  | 0.90892800  | -0.32085900 | 2.89960800  |
| C  | 2.06565600  | -0.62608100 | 3.80419000  |
| C  | 0.14137600  | 0.92248900  | 3.22797600  |
| H  | 2.70749700  | 0.25543600  | 3.95657700  |
| H  | 2.69217600  | -1.43948000 | 3.40736200  |
| H  | 0.79502900  | 1.81017100  | 3.24348300  |
| H  | -0.67731400 | 1.10772600  | 2.52043400  |
| H  | 6.18789400  | 0.14581000  | 1.71989400  |
| C  | -3.73205600 | -3.17533400 | -1.08137800 |
| H  | -3.75552200 | -3.69814800 | -2.05004800 |
| H  | -3.65572600 | -3.94915500 | -0.29912400 |
| H  | -4.68451900 | -2.64474300 | -0.94359900 |
| C  | -3.92289200 | 3.98596800  | 1.44833600  |
| H  | -4.78181200 | 3.30884900  | 1.55526400  |
| H  | -3.73480200 | 4.47411400  | 2.41718100  |
| H  | -4.20010800 | 4.78067500  | 0.73558800  |
| C  | 0.14094900  | -1.50531600 | 2.39991100  |
| H  | -0.66437500 | -1.21879700 | 1.71091100  |
| H  | 0.79774500  | -2.22523500 | 1.88452900  |
| H  | -0.33165900 | -2.05264400 | 3.24444900  |
| H  | -0.31389900 | 0.84612700  | 4.23935000  |
| H  | 1.69877500  | -0.94589100 | 4.80346700  |

UM06/def2-TZVPP-CPCM(THF)//UB3LYP-D3/def2-SVP-CPCM(THF)  
HF=-5045.4957062  
UB3LYP-D3/def2-TZVPP-CPCM(THF)//UB3LYP-D3/def2-SVP-CPCM(THF)  
HF=-5046.5367812



#### **<sup>4</sup>I-TS**

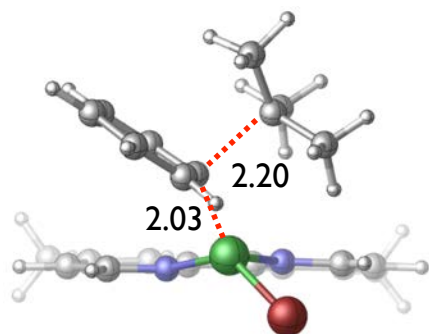

UB3LYP-D3/def2-SVP-CPCM(THF)

Zero-point correction= 0.423090 (Hartree/Particle)

Thermal correction to Energy= 0.450907

Thermal correction to Enthalpy= 0.451851

Thermal correction to Gibbs Free Energy= 0.361396

Sum of electronic and zero-point Energies= -5044.542031

Sum of electronic and thermal Energies= -5044.514215

Sum of electronic and thermal Enthalpies= -5044.513270

Sum of electronic and thermal Free Energies= -5044.603726

|    |             |             |             |
|----|-------------|-------------|-------------|
| Ni | 1.00135600  | 1.42580000  | 0.04129900  |
| C  | 2.02000000  | 0.07814700  | 1.17453600  |
| C  | 3.93315500  | -2.07728400 | 1.15319100  |
| C  | 3.43288500  | 0.29828400  | 1.02085000  |
| C  | 1.63092500  | -1.30446900 | 1.21498900  |
| C  | 2.55286200  | -2.34444500 | 1.23634800  |
| C  | 4.35898900  | -0.74276500 | 1.03278300  |
| H  | 3.79393400  | 1.32489200  | 0.90185400  |
| H  | 0.56512100  | -1.55255200 | 1.24828500  |
| H  | 2.20252300  | -3.38075100 | 1.29090300  |
| H  | 5.42643100  | -0.52063300 | 0.92890300  |
| N  | -0.89401700 | 2.03940500  | 0.51380700  |
| C  | -3.56934600 | 2.63784800  | 1.09908700  |
| C  | -1.21167500 | 3.15802500  | 1.18217100  |
| C  | -1.87998700 | 1.21421900  | 0.09068800  |
| C  | -3.22327800 | 1.48924400  | 0.38009700  |
| C  | -2.52195100 | 3.49173000  | 1.49550500  |
| N  | -0.09733200 | 0.04534000  | -0.98052000 |
| C  | -1.72321000 | -2.06579300 | -1.84944700 |
| C  | 0.42587200  | -0.97644000 | -1.67241200 |
| C  | -1.41869300 | 0.04577700  | -0.68977000 |
| C  | -2.24981100 | -0.99990400 | -1.11028500 |
| C  | -0.34489300 | -2.03680300 | -2.13142800 |
| H  | -0.37158200 | 3.79948600  | 1.45667900  |
| H  | -4.00678500 | 0.81553400  | 0.03241500  |

|    |             |             |             |
|----|-------------|-------------|-------------|
| H  | -2.72889600 | 4.41386500  | 2.04218700  |
| H  | 1.50289900  | -0.93420300 | -1.84772000 |
| H  | -3.31006400 | -0.99346900 | -0.85626500 |
| H  | 0.12601800  | -2.84155600 | -2.69960600 |
| Br | 2.10369000  | 3.55939100  | -0.38470900 |
| C  | 1.60926300  | 0.73058300  | 3.23513900  |
| C  | 2.54956500  | -0.10886100 | 4.05616600  |
| C  | 1.93791500  | 2.19806400  | 3.21829800  |
| H  | 3.60092400  | 0.08623000  | 3.79444600  |
| H  | 2.35480700  | -1.18411500 | 3.92224600  |
| H  | 2.99142400  | 2.37533000  | 2.95440400  |
| H  | 1.32098100  | 2.75065800  | 2.49722400  |
| H  | 4.65885800  | -2.89498300 | 1.15903700  |
| C  | -2.58235200 | -3.20804900 | -2.31633900 |
| H  | -3.63844800 | -3.06244600 | -2.04961600 |
| H  | -2.51152600 | -3.32503800 | -3.40984200 |
| H  | -2.23976200 | -4.15626900 | -1.87026900 |
| C  | -4.99807700 | 2.96615500  | 1.43148300  |
| H  | -5.69656700 | 2.22517400  | 1.01846500  |
| H  | -5.13933800 | 3.00560100  | 2.52409000  |
| H  | -5.26879600 | 3.95941000  | 1.03818500  |
| C  | 0.15182100  | 0.40560400  | 3.42019600  |
| H  | -0.46414900 | 0.87526500  | 2.64206100  |
| H  | -0.02996500 | -0.67959200 | 3.39789400  |
| H  | -0.20509700 | 0.78000400  | 4.40156300  |
| H  | 1.76418400  | 2.64050000  | 4.22078000  |
| H  | 2.42471500  | 0.12233500  | 5.13414200  |

UM06/def2-TZVPP-CPCM(THF)//UB3LYP-D3/def2-SVP-CPCM(THF)  
HF=-5045.4932847  
UB3LYP-D3/def2-TZVPP-CPCM(THF)//UB3LYP-D3/def2-SVP-CPCM(THF)  
HF=-5046.5389644

## <sup>2</sup>L-TS

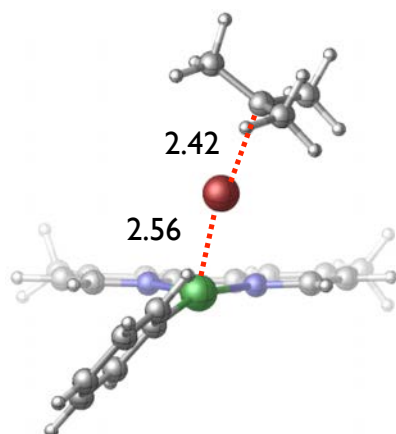

UB3LYP-D3/def2-SVP-CPCM(THF)

Zero-point correction= 0.422923 (Hartree/Particle)

Thermal correction to Energy= 0.451544

Thermal correction to Enthalpy= 0.452488

Thermal correction to Gibbs Free Energy= 0.356259

Sum of electronic and zero-point Energies= -5044.541704

Sum of electronic and thermal Energies= -5044.513083

Sum of electronic and thermal Enthalpies= -5044.512138

Sum of electronic and thermal Free Energies= -5044.608368

|    |             |             |             |
|----|-------------|-------------|-------------|
| Ni | -0.42182000 | 0.28394900  | 0.52338800  |
| C  | -1.80483100 | 1.59839400  | 0.08222800  |
| C  | -3.75127500 | 3.55126000  | -0.71046800 |
| C  | -3.11085500 | 1.62512200  | 0.62313500  |
| C  | -1.52534800 | 2.60154000  | -0.87716700 |
| C  | -2.46877300 | 3.56119400  | -1.27153000 |
| C  | -4.06879200 | 2.57418800  | 0.24189900  |
| H  | -3.38188200 | 0.88078600  | 1.38049600  |
| H  | -0.52897400 | 2.64102100  | -1.33505300 |
| H  | -2.20361700 | 4.31984100  | -2.01585000 |
| H  | -5.06786900 | 2.55682500  | 0.69094200  |
| N  | 1.38089900  | 1.24846600  | 0.65316400  |
| C  | 3.94018900  | 2.39158400  | 0.67012700  |
| C  | 1.53603800  | 2.56455300  | 0.83111200  |
| C  | 2.47049700  | 0.46895700  | 0.48739400  |
| C  | 3.75881600  | 1.01414900  | 0.48322500  |
| C  | 2.78796100  | 3.17384400  | 0.85031300  |
| N  | 0.86296800  | -1.29176100 | 0.35058000  |
| C  | 2.78615500  | -3.31968700 | 0.11769000  |
| C  | 0.49414600  | -2.57644000 | 0.27451100  |
| C  | 2.17591600  | -0.98024300 | 0.33754200  |
| C  | 3.15617800  | -1.97280700 | 0.21740800  |
| C  | 1.41223400  | -3.61388500 | 0.15535900  |

|    |             |             |             |
|----|-------------|-------------|-------------|
| H  | 0.61307200  | 3.13688900  | 0.95197000  |
| H  | 4.62822500  | 0.37261300  | 0.33671800  |
| H  | 2.86288300  | 4.25292500  | 1.00057900  |
| H  | -0.58091200 | -2.76685800 | 0.32347700  |
| H  | 4.21293800  | -1.70438900 | 0.20897700  |
| H  | 1.05973000  | -4.64567000 | 0.09425500  |
| C  | -1.70339200 | -1.51724700 | 4.95922900  |
| H  | -4.49368300 | 4.29747100  | -1.00910500 |
| C  | 3.80773700  | -4.41465600 | -0.01957800 |
| H  | 4.83431000  | -4.02383000 | 0.01188900  |
| H  | 3.69193600  | -5.15735300 | 0.78619000  |
| H  | 3.67032500  | -4.95176500 | -0.97237900 |
| C  | 5.31233900  | 3.00659900  | 0.70318300  |
| H  | 5.61477600  | 3.20019900  | 1.74652000  |
| H  | 6.06663800  | 2.34633500  | 0.25205200  |
| H  | 5.32697200  | 3.97333400  | 0.17749400  |
| C  | -3.17908900 | -1.74559500 | 4.77101000  |
| H  | -3.72436000 | -0.79764000 | 4.64426200  |
| H  | -3.38258300 | -2.38384100 | 3.89725400  |
| H  | -3.59803200 | -2.25610000 | 5.66316200  |
| C  | -0.85347500 | -2.75976100 | 4.94519400  |
| H  | 0.22032000  | -2.51700700 | 4.94208600  |
| H  | -1.05765300 | -3.36614900 | 5.85213700  |
| H  | -1.07002500 | -3.38925900 | 4.06831700  |
| C  | -1.33700500 | -0.49842700 | 6.00492700  |
| H  | -1.58017900 | -0.89104400 | 7.01440800  |
| H  | -0.26032500 | -0.26896400 | 5.98909400  |
| H  | -1.89570700 | 0.44068200  | 5.87117300  |
| Br | -1.07018600 | -0.42224200 | 2.89432600  |

UM06/def2-TZVPP-CPCM(THF)//UB3LYP-D3/def2-SVP-CPCM(THF)

HF=-5045.5065849

UB3LYP-D3/def2-TZVPP-CPCM(THF)//UB3LYP-D3/def2-SVP-CPCM(THF)

HF=-5046.5454233

**<sup>2</sup>P<sub>B</sub>**



UB3LYP-D3/def2-SVP-CPCM(THF)

Zero-point correction= 0.214708 (Hartree/Particle)

Thermal correction to Energy= 0.230876

Thermal correction to Enthalpy= 0.231820

Thermal correction to Gibbs Free Energy= 0.166322

Sum of electronic and zero-point Energies= -4655.579462

Sum of electronic and thermal Energies= -4655.563294

Sum of electronic and thermal Enthalpies= -4655.562349

Sum of electronic and thermal Free Energies= -4655.627848

|    |             |             |             |
|----|-------------|-------------|-------------|
| Ni | -3.99183200 | 1.30009300  | -1.54653000 |
| C  | -1.87359800 | -0.39708200 | -0.83451100 |
| C  | -0.60463100 | -0.81497600 | -0.41773600 |
| C  | 0.38038200  | 0.12429500  | -0.09164500 |
| C  | 0.02971800  | 1.48282700  | -0.20377800 |
| C  | -1.24637600 | 1.83242200  | -0.62458000 |
| C  | -2.97912600 | -1.31121800 | -1.19958100 |
| C  | -2.90514100 | -2.70937500 | -1.17420400 |
| C  | -4.01531200 | -3.47922700 | -1.54213400 |
| C  | -5.17917400 | -2.78948900 | -1.92940000 |
| C  | -5.18373000 | -1.39947400 | -1.93172800 |
| H  | -0.37768600 | -1.87943400 | -0.34653600 |
| H  | 0.75171100  | 2.26661600  | 0.03582700  |
| H  | -1.54668200 | 2.87837300  | -0.72245500 |
| H  | -1.98301600 | -3.20525100 | -0.86858000 |
| H  | -6.07708900 | -3.33486700 | -2.22820500 |
| H  | -6.06484300 | -0.82279400 | -2.22618200 |
| N  | -2.18757800 | 0.92199600  | -0.93709400 |
| N  | -4.11313300 | -0.67488700 | -1.57617200 |
| C  | 1.75486100  | -0.28579000 | 0.36089600  |
| H  | 1.95781900  | 0.09097300  | 1.37696900  |
| H  | 1.87445700  | -1.37835300 | 0.36807700  |
| H  | 2.52660300  | 0.14347000  | -0.29878000 |
| C  | -3.97959500 | -4.98297800 | -1.52479800 |
| H  | -2.98906900 | -5.36658100 | -1.24261000 |
| H  | -4.71990400 | -5.37924000 | -0.81035300 |
| H  | -4.24149600 | -5.38984900 | -2.51492300 |
| Br | -5.83964900 | 2.56755300  | -2.20535500 |

UM06/def2-TZVPP-CPCM(THF)//UB3LYP-D3/def2-SVP-CPCM(THF)

HF=-4656.2756634

UB3LYP-D3/def2-TZVPP-CPCM(THF)//UB3LYP-D3/def2-SVP-CPCM(THF)  
HF=-4656.9610627

**tBu-Ph**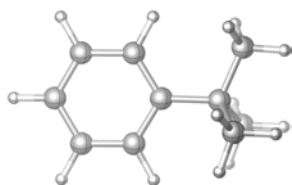

UB3LYP-D3/def2-SVP-CPCM(THF)

Zero-point correction= 0.212552 (Hartree/Particle)

Thermal correction to Energy= 0.222172

Thermal correction to Enthalpy= 0.223116

Thermal correction to Gibbs Free Energy= 0.178247

Sum of electronic and zero-point Energies= -389.034504

Sum of electronic and thermal Energies= -389.024885

Sum of electronic and thermal Enthalpies= -389.023940

Sum of electronic and thermal Free Energies= -389.068810

|   |             |            |             |
|---|-------------|------------|-------------|
| C | 0.04421000  | 1.70961600 | 1.14572500  |
| C | 1.44490300  | 1.73358100 | 1.12055900  |
| C | 2.12656700  | 2.88889000 | 0.73341700  |
| C | 1.38993500  | 4.02254300 | 0.37071900  |
| C | -0.00591100 | 3.99264800 | 0.39798600  |
| C | -0.71318100 | 2.83690300 | 0.78576000  |
| H | -0.45028400 | 0.78804600 | 1.45338500  |
| H | 2.00284900  | 0.83794100 | 1.40728300  |
| H | 3.21924500  | 2.90824800 | 0.71359200  |
| H | 1.90528600  | 4.93693000 | 0.06433300  |
| H | -0.55299400 | 4.89314100 | 0.10924100  |
| C | -2.25333700 | 2.84939200 | 0.79950700  |
| C | -2.74935100 | 3.94948800 | 1.76551900  |
| H | -2.40180400 | 4.94892000 | 1.46299200  |
| H | -3.85134000 | 3.97127700 | 1.78683700  |
| H | -2.39094800 | 3.76208800 | 2.79042100  |
| C | -2.84401600 | 1.50472700 | 1.25836000  |
| H | -3.94379100 | 1.56138300 | 1.25324000  |
| H | -2.55073000 | 0.67977000 | 0.59043900  |
| H | -2.52933600 | 1.24749100 | 2.28192300  |
| C | -2.77455500 | 3.14452300 | -0.62558100 |
| H | -3.87683800 | 3.15946900 | -0.63495500 |
| H | -2.42445300 | 4.11964200 | -0.99703000 |
| H | -2.43723000 | 2.37132500 | -1.33443100 |

UM06/def2-TZVPP-CPCM(THF)//UB3LYP-D3/def2-SVP-CPCM(THF)

HF=-389.3290308

UB3LYP-D3/def2-TZVPP-CPCM(THF)//UB3LYP-D3/def2-SVP-CPCM(THF)

HF=-389.6748001

<sup>2</sup>P<sub>C</sub>

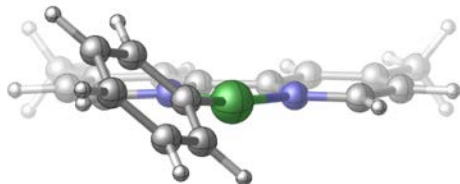

UB3LYP-D3/def2-SVP-CPCM(THF)

Zero-point correction= 0.303134 (Hartree/Particle)

Thermal correction to Energy= 0.322860

Thermal correction to Enthalpy= 0.323805

Thermal correction to Gibbs Free Energy= 0.250611

Sum of electronic and zero-point Energies= -2313.026966

Sum of electronic and thermal Energies= -2313.007240

Sum of electronic and thermal Enthalpies= -2313.006296

Sum of electronic and thermal Free Energies= -2313.079489

|    |             |             |             |
|----|-------------|-------------|-------------|
| Ni | -3.96398300 | 1.44675100  | -1.21509900 |
| C  | -1.83575500 | -0.36900700 | -0.73179300 |
| C  | -0.55130400 | -0.83036800 | -0.42006200 |
| C  | 0.43164200  | 0.05760500  | 0.03112800  |
| C  | 0.06264200  | 1.41025300  | 0.15257000  |
| C  | -1.22735300 | 1.80375600  | -0.17808400 |
| C  | -2.94328000 | -1.23262600 | -1.20069300 |
| C  | -2.85927000 | -2.62301000 | -1.34872800 |
| C  | -3.97607300 | -3.35335800 | -1.77274900 |
| C  | -5.15577000 | -2.63260900 | -2.03077500 |
| C  | -5.16546600 | -1.25120500 | -1.86635600 |
| H  | -0.31078600 | -1.88864300 | -0.52848300 |
| H  | 0.78098300  | 2.15531600  | 0.50175800  |
| H  | -1.53996000 | 2.84781500  | -0.09948800 |
| H  | -1.92710500 | -3.14475700 | -1.12852900 |
| H  | -6.06285900 | -3.14566800 | -2.35800600 |
| H  | -6.06078500 | -0.65514500 | -2.05962300 |
| N  | -2.16615900 | 0.94343400  | -0.61445400 |
| N  | -4.08728100 | -0.56287300 | -1.46861500 |
| C  | 1.82261900  | -0.39985100 | 0.37491200  |
| H  | 2.05670900  | -0.17550000 | 1.42863300  |
| H  | 1.94941500  | -1.48000600 | 0.21584000  |
| H  | 2.56967500  | 0.13060300  | -0.23804800 |
| C  | -3.92851700 | -4.84679700 | -1.94782400 |
| H  | -2.95001600 | -5.26161200 | -1.66768600 |
| H  | -4.70238900 | -5.33564400 | -1.33408100 |
| H  | -4.13207500 | -5.11973300 | -2.99640100 |
| C  | -5.53228400 | 2.36315800  | -1.90331200 |
| C  | -6.16411500 | 3.46923000  | -1.27984400 |



|   |             |            |             |
|---|-------------|------------|-------------|
| C | -6.13057200 | 1.95132100 | -3.12227500 |
| C | -7.29512300 | 4.10503900 | -1.81103500 |
| H | -5.75841000 | 3.85373800 | -0.33612700 |
| C | -7.25947700 | 2.57286700 | -3.67293800 |
| H | -5.69267000 | 1.10759400 | -3.66945300 |
| C | -7.85243900 | 3.65805100 | -3.01549200 |
| H | -7.74560100 | 4.95361600 | -1.28450500 |
| H | -7.67970900 | 2.21192800 | -4.61812500 |
| H | -8.73512500 | 4.14906300 | -3.43623300 |

UM06/def2-TZVPP-CPCM(THF)//UB3LYP-D3/def2-SVP-CPCM(THF)  
HF=-2313.662927  
UB3LYP-D3/def2-TZVPP-CPCM(THF)//UB3LYP-D3/def2-SVP-CPCM(THF)  
HF=-2314.4257224

**tBu-Br**

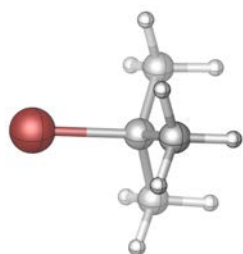

UB3LYP-D3/def2-SVP-CPCM(THF)

Zero-point correction= 0.121249 (Hartree/Particle)

Thermal correction to Energy= 0.127905

Thermal correction to Enthalpy= 0.128849

Thermal correction to Gibbs Free Energy= 0.090653

Sum of electronic and zero-point Energies= -2731.509462

Sum of electronic and thermal Energies= -2731.502806

Sum of electronic and thermal Enthalpies= -2731.501862

Sum of electronic and thermal Free Energies= -2731.540058

Br 0.66845300 -3.32582400 -0.02012300

C -0.35404100 -1.55353000 -0.02192100

C 0.09890600 -0.79012700 -1.26110700

H -0.13485200 -1.34337700 -2.18230000

H -0.43396200 0.17601100 -1.29443400

H 1.17917200 -0.58596100 -1.23527900

C -1.83589000 -1.90706100 -0.07308600

H -2.13789300 -2.49998800 0.80239100

H -2.42204700 -0.97172100 -0.07532100

H -2.08349000 -2.47031100 -0.98450400

C 0.02110100 -0.83233800 1.26757900

H -0.51694000 0.13087300 1.30189300

H -0.26517900 -1.41745400 2.15359400

H 1.10013000 -0.62515900 1.31345500

UM06/def2-TZVPP-CPCM(THF)//UB3LYP-D3/def2-SVP-CPCM(THF)

HF=-2731.8563155

UB3LYP-D3/def2-TZVPP-CPCM(THF)//UB3LYP-D3/def2-SVP-CPCM(THF)

HF=-2732.1242505

Figure S9 (with Becke-Johnson damping)

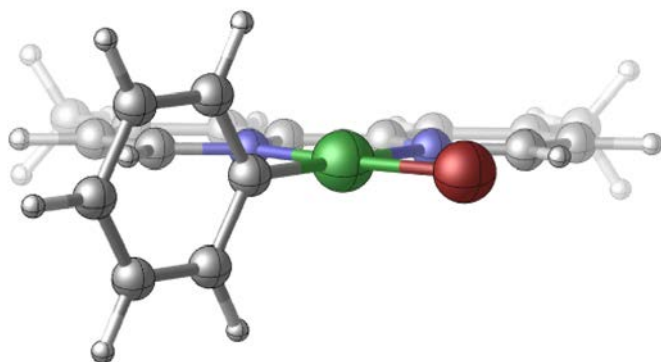

UB3LYP-D3BJ/def2-SVP-CPCM(THF)

|                                              |                             |             |             |
|----------------------------------------------|-----------------------------|-------------|-------------|
| Zero-point correction=                       | 0.306461 (Hartree/Particle) |             |             |
| Thermal correction to Energy=                | 0.326798                    |             |             |
| Thermal correction to Enthalpy=              | 0.327742                    |             |             |
| Thermal correction to Gibbs Free Energy=     | 0.253612                    |             |             |
| Sum of electronic and zero-point Energies=   | -4887.034664                |             |             |
| Sum of electronic and thermal Energies=      | -4887.014327                |             |             |
| Sum of electronic and thermal Enthalpies=    | -4887.013383                |             |             |
| Sum of electronic and thermal Free Energies= | -4887.087513                |             |             |
| Ni                                           | -4.61455800                 | 0.39141800  | -0.38378100 |
| C                                            | -6.47995100                 | 0.32752600  | -0.64642700 |
| C                                            | -7.06929100                 | 0.72563800  | -1.85950000 |
| C                                            | -7.32573900                 | -0.19722300 | 0.34733000  |
| C                                            | -8.44464000                 | 0.58283800  | -2.08288600 |
| H                                            | -6.44788200                 | 1.15381400  | -2.65241400 |
| C                                            | -8.70232500                 | -0.34109800 | 0.13197000  |
| H                                            | -6.90771400                 | -0.51094000 | 1.30937600  |
| C                                            | -9.26861600                 | 0.04583400  | -1.08749400 |
| H                                            | -8.87587500                 | 0.89543900  | -3.03877400 |
| H                                            | -9.33600100                 | -0.75704500 | 0.92114600  |
| H                                            | -10.34235900                | -0.06639400 | -1.25931300 |
| Br                                           | -4.83954100                 | 2.61489600  | 0.34890300  |
| C                                            | -2.08006400                 | -0.92116800 | -0.45758300 |
| C                                            | -0.71658600                 | -1.19386200 | -0.31567800 |
| C                                            | 0.14713300                  | -0.21566200 | 0.18983700  |
| C                                            | -0.42098800                 | 1.02026200  | 0.53406200  |
| C                                            | -1.78653700                 | 1.22356800  | 0.36804800  |
| C                                            | -3.06510700                 | -1.88765800 | -0.98117200 |
| C                                            | -2.72565700                 | -3.17109000 | -1.41575200 |
| C                                            | -3.70626600                 | -4.03929000 | -1.90596700 |
| C                                            | -5.02125000                 | -3.55308100 | -1.93323700 |
| C                                            | -5.29618900                 | -2.26681600 | -1.48742800 |
| H                                            | -0.31865600                 | -2.16867700 | -0.59552600 |

|   |             |             |             |
|---|-------------|-------------|-------------|
| H | 0.19699500  | 1.82707600  | 0.93279300  |
| H | -2.26735000 | 2.17027400  | 0.62492300  |
| H | -1.68801300 | -3.50015800 | -1.37533500 |
| H | -5.84024600 | -4.17312400 | -2.30241600 |
| H | -6.31123600 | -1.87427200 | -1.50210400 |
| N | -2.60198000 | 0.27710900  | -0.11591900 |
| N | -4.34663200 | -1.43785100 | -1.01661200 |
| C | 1.61663500  | -0.47344500 | 0.36269600  |
| H | 1.89776400  | -0.40195800 | 1.42590300  |
| H | 1.90088100  | -1.46896700 | -0.00428500 |
| H | 2.20936800  | 0.28185300  | -0.17712700 |
| C | -3.37343200 | -5.42157500 | -2.38792100 |
| H | -3.59867400 | -5.51805300 | -3.46249700 |
| H | -2.31286900 | -5.66220400 | -2.23393200 |
| H | -3.98429000 | -6.17334000 | -1.86370600 |

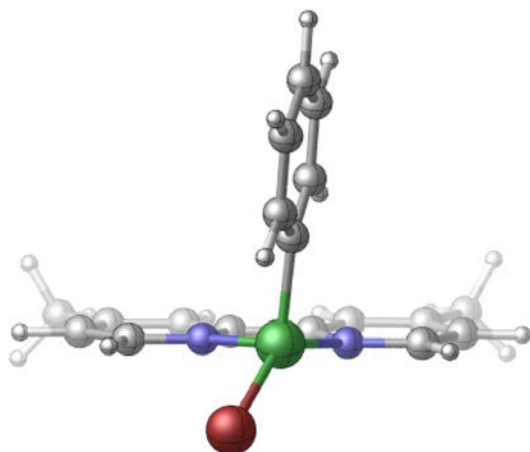

UB3LYP-D3BJ/def2-SVP-CPCM(THF)

Zero-point correction= 0.305082 (Hartree/Particle)

Thermal correction to Energy= 0.327019

Thermal correction to Enthalpy= 0.327963

Thermal correction to Gibbs Free Energy= 0.246939

Sum of electronic and zero-point Energies= -4887.032375

Sum of electronic and thermal Energies= -4887.010439

Sum of electronic and thermal Enthalpies= -4887.009494

Sum of electronic and thermal Free Energies= -4887.090519

|    |             |             |             |
|----|-------------|-------------|-------------|
| C  | -1.67439600 | 0.90308300  | -0.64637300 |
| C  | -1.84605600 | 0.00921700  | 0.42800600  |
| C  | -3.07766900 | -0.67227900 | 0.49143500  |
| C  | -4.08768700 | -0.47102500 | -0.45923300 |
| C  | -3.88787800 | 0.42453000  | -1.51520600 |
| C  | -2.67264600 | 1.11236300  | -1.60688000 |
| Br | -0.90109600 | -2.16723900 | 3.30580200  |
| H  | -3.25387400 | -1.38515300 | 1.30419200  |
| H  | -0.73615300 | 1.46023800  | -0.75016000 |
| H  | -2.50304800 | 1.81374400  | -2.43003000 |
| H  | -4.67130500 | 0.58428500  | -2.26125500 |
| H  | -5.03298000 | -1.01689000 | -0.37771600 |
| C  | 1.99355600  | 0.06542900  | 0.28566900  |
| C  | 1.37074100  | -2.17251900 | 0.20732800  |
| C  | 2.44074900  | -2.48947000 | -0.62142100 |
| C  | 3.33200200  | -1.47888000 | -1.01880900 |
| C  | 3.08937000  | -0.18348100 | -0.54637800 |
| C  | 1.65209400  | 1.39945800  | 0.83712100  |
| C  | 0.17967400  | 2.57976100  | 2.18952000  |
| C  | 0.83585100  | 3.77934100  | 1.94024000  |
| C  | 1.95525000  | 3.79245000  | 1.09192400  |
| C  | 2.35588900  | 2.57050500  | 0.53879900  |
| H  | 0.65892000  | -2.92818700 | 0.54830100  |

|    |             |             |             |
|----|-------------|-------------|-------------|
| H  | 2.58098600  | -3.51968000 | -0.95371900 |
| H  | 3.76239000  | 0.62605000  | -0.82761700 |
| H  | -0.70242300 | 2.53971100  | 2.83335800  |
| H  | 0.47388300  | 4.69967200  | 2.40212200  |
| H  | 3.21583000  | 2.53874300  | -0.12966200 |
| N  | 1.15583200  | -0.92758900 | 0.64512400  |
| N  | 0.58069100  | 1.41995500  | 1.65742100  |
| Ni | -0.43284100 | -0.35400600 | 1.76916300  |
| C  | 2.67656200  | 5.07255000  | 0.78089400  |
| H  | 3.61042600  | 4.89040300  | 0.23203700  |
| H  | 2.03937000  | 5.72984800  | 0.16640500  |
| H  | 2.91062900  | 5.62385500  | 1.70458600  |
| C  | 4.49472400  | -1.78212000 | -1.92015900 |
| H  | 5.15539700  | -0.91255100 | -2.03768400 |
| H  | 5.08551300  | -2.62309900 | -1.52506400 |
| H  | 4.13702000  | -2.08132800 | -2.91901300 |

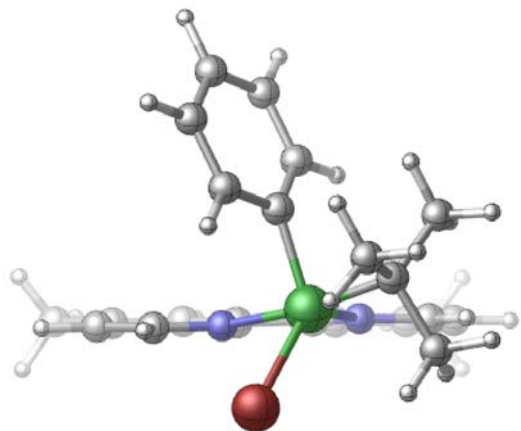

UB3LYP-D3BJ/def2-SVP-CPCM(THF)

Zero-point correction= 0.426844 (Hartree/Particle)

Thermal correction to Energy= 0.454721

Thermal correction to Enthalpy= 0.455665

Thermal correction to Gibbs Free Energy= 0.365748

Sum of electronic and zero-point Energies= -5044.644159

Sum of electronic and thermal Energies= -5044.616282

Sum of electronic and thermal Enthalpies= -5044.615338

Sum of electronic and thermal Free Energies= -5044.705255

|   |             |             |             |
|---|-------------|-------------|-------------|
| C | 2.71091400  | 0.70133000  | 0.17596900  |
| C | 3.72349900  | -0.43154200 | 0.28402500  |
| C | 2.98998400  | 1.53526600  | -1.08049000 |
| H | 3.67687400  | -1.10725700 | -0.58063800 |
| H | 3.57774000  | -1.02143400 | 1.19949200  |
| H | 3.15682700  | 0.89559100  | -1.95584100 |
| H | 2.18550900  | 2.23884300  | -1.34152700 |
| C | -1.69402700 | 1.55618600  | -0.04726500 |
| C | -2.63173800 | 2.57677800  | 0.15141200  |
| C | -2.22064200 | 3.90684800  | 0.27641200  |
| C | -0.84314500 | 4.15306100  | 0.18713200  |
| C | 0.03023000  | 3.08910500  | -0.00498100 |
| C | -2.09021700 | 0.13838900  | -0.21383300 |
| C | -3.41303500 | -0.30945800 | -0.10707200 |
| C | -3.71271400 | -1.66483200 | -0.27611500 |
| C | -2.64112400 | -2.52694500 | -0.55775500 |
| C | -1.35382900 | -2.01254400 | -0.65025000 |
| H | -3.69370500 | 2.34105200  | 0.20160700  |
| H | -0.44643100 | 5.16687700  | 0.26539300  |
| H | 1.10083200  | 3.27379300  | -0.07558200 |
| H | -4.21723300 | 0.39093900  | 0.11374100  |
| H | -2.80673000 | -3.59632400 | -0.70153300 |
| H | -0.49597000 | -2.64747600 | -0.87629200 |
| N | -0.36945900 | 1.81503100  | -0.11266300 |

|    |             |             |             |
|----|-------------|-------------|-------------|
| N  | -1.08673700 | -0.71263200 | -0.48381700 |
| Br | 1.50821600  | -1.31897800 | -2.33001600 |
| Ni | 0.85259800  | 0.02307700  | -0.28079500 |
| C  | 0.79730100  | -0.69864000 | 1.49793900  |
| C  | 0.19519200  | -0.03263100 | 2.57163300  |
| C  | 1.17579900  | -2.03728600 | 1.66018800  |
| C  | -0.01918000 | -0.68997200 | 3.79003700  |
| H  | -0.10878200 | 1.01265000  | 2.47201700  |
| C  | 0.96369600  | -2.69875500 | 2.87698900  |
| H  | 1.63990400  | -2.57691200 | 0.82945200  |
| H  | -0.48937000 | -0.15415600 | 4.61983500  |
| H  | 1.26665300  | -3.74406700 | 2.98682800  |
| C  | 0.36551400  | -2.02585000 | 3.94750800  |
| H  | 0.19984000  | -2.53889000 | 4.89826300  |
| C  | -3.20164200 | 5.02385800  | 0.48646100  |
| H  | -3.13626200 | 5.75429200  | -0.33587700 |
| H  | -4.23415500 | 4.65350500  | 0.54162900  |
| H  | -2.97452000 | 5.56770700  | 1.41724000  |
| C  | -5.11835800 | -2.18248600 | -0.16317700 |
| H  | -5.43728700 | -2.64475300 | -1.11124400 |
| H  | -5.18275500 | -2.96280500 | 0.61179300  |
| H  | -5.82734500 | -1.38202800 | 0.08820300  |
| H  | 4.74437300  | -0.00292000 | 0.32699200  |
| H  | 3.90056500  | 2.14439200  | -0.91590400 |
| C  | 2.76897100  | 1.55791900  | 1.43739900  |
| H  | 1.95083600  | 2.28612000  | 1.51619100  |
| H  | 2.74202400  | 0.94099800  | 2.34489300  |
| H  | 3.71643100  | 2.13055100  | 1.44891200  |



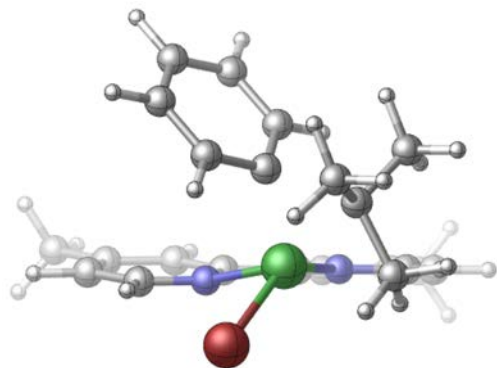

UB3LYP-D3BJ/def2-SVP-CPCM(THF)

Zero-point correction= 0.426726 (Hartree/Particle)

Thermal correction to Energy= 0.453765

Thermal correction to Enthalpy= 0.454709

Thermal correction to Gibbs Free Energy= 0.366635

Sum of electronic and zero-point Energies= -5044.630260

Sum of electronic and thermal Energies= -5044.603220

Sum of electronic and thermal Enthalpies= -5044.602276

Sum of electronic and thermal Free Energies= -5044.690350

|    |             |             |             |
|----|-------------|-------------|-------------|
| C  | 2.44567300  | 0.53879700  | 0.51789700  |
| C  | 3.55988700  | -0.48320800 | 0.69515100  |
| C  | 2.69124800  | 1.26143600  | -0.82820000 |
| H  | 3.51406200  | -1.25983000 | -0.08110200 |
| H  | 3.53199200  | -0.96353900 | 1.68286000  |
| H  | 2.97872300  | 0.55874900  | -1.61770900 |
| H  | 1.84801100  | 1.85518400  | -1.21171100 |
| C  | -1.97392900 | 1.50906500  | -0.14440500 |
| C  | -2.90744400 | 2.53108100  | 0.06641500  |
| C  | -2.49476400 | 3.86306000  | 0.16272800  |
| C  | -1.11973300 | 4.10986300  | 0.03412600  |
| C  | -0.25100100 | 3.04575600  | -0.17615500 |
| C  | -2.36794500 | 0.08522200  | -0.26140900 |
| C  | -3.65266100 | -0.38646800 | 0.03509500  |
| C  | -3.94659600 | -1.74822600 | -0.09126900 |
| C  | -2.90999100 | -2.58957500 | -0.52593500 |
| C  | -1.65662000 | -2.05212900 | -0.79547800 |
| H  | -3.96773700 | 2.29311700  | 0.14331500  |
| H  | -0.72282900 | 5.12494000  | 0.09412100  |
| H  | 0.81856500  | 3.23114600  | -0.27955900 |
| H  | -4.42648800 | 0.29800700  | 0.38125300  |
| H  | -3.07541100 | -3.66202900 | -0.64685900 |
| H  | -0.81926500 | -2.66854200 | -1.13014400 |
| N  | -0.65260300 | 1.76954400  | -0.26060600 |
| N  | -1.39242000 | -0.74687800 | -0.66659600 |
| Br | 1.43767500  | -1.57408300 | -2.31924700 |

|    |             |             |             |
|----|-------------|-------------|-------------|
| Ni | 0.52937800  | 0.00131100  | -0.52962500 |
| C  | 0.85280700  | -0.63865600 | 1.24830300  |
| C  | 0.09354700  | -0.06193700 | 2.28413400  |
| C  | 1.10655300  | -2.02232200 | 1.30784000  |
| C  | -0.43862000 | -0.84744200 | 3.31019100  |
| H  | -0.11698500 | 1.00807500  | 2.27819200  |
| C  | 0.57567900  | -2.80689800 | 2.33566600  |
| H  | 1.68758200  | -2.49660000 | 0.51628400  |
| H  | -1.04554100 | -0.37555300 | 4.08810000  |
| H  | 0.76942900  | -3.88326900 | 2.34387300  |
| C  | -0.20357300 | -2.22681000 | 3.34286400  |
| H  | -0.61848600 | -2.84046300 | 4.14613200  |
| C  | -3.47141200 | 4.98238300  | 0.38274900  |
| H  | -3.43766600 | 5.69516600  | -0.45690500 |
| H  | -4.50023900 | 4.61061200  | 0.48136200  |
| H  | -3.21471500 | 5.54710100  | 1.29320600  |
| C  | -5.30712300 | -2.29630900 | 0.23476800  |
| H  | -5.71999000 | -2.85009600 | -0.62328000 |
| H  | -5.24523600 | -3.00657000 | 1.07528700  |
| H  | -6.01222800 | -1.49930600 | 0.50773000  |
| H  | 4.53399100  | 0.03065800  | 0.59548900  |
| H  | 3.52402500  | 1.97625100  | -0.68136900 |
| C  | 2.46599700  | 1.56065500  | 1.64871200  |
| H  | 1.63202800  | 2.27372300  | 1.59353400  |
| H  | 2.43495200  | 1.08311300  | 2.63716600  |
| H  | 3.40078300  | 2.14669100  | 1.58526300  |

Figure S11

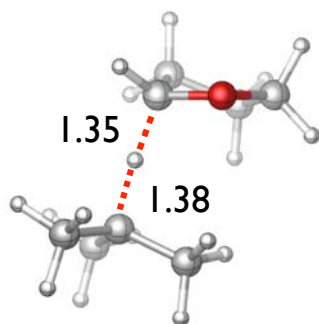

UB3LYP-D3/def2-SVP-CPCM(THF)  
Zero-point correction= 0.229357 (Hartree/Particle)  
Thermal correction to Energy= 0.240955  
Thermal correction to Enthalpy= 0.241899  
Thermal correction to Gibbs Free Energy= 0.191011  
Sum of electronic and zero-point Energies= -389.737578  
Sum of electronic and thermal Energies= -389.725980  
Sum of electronic and thermal Enthalpies= -389.725036  
Sum of electronic and thermal Free Energies= -389.775924

|   |             |             |             |
|---|-------------|-------------|-------------|
| C | -1.44189600 | -5.62124800 | -0.67071100 |
| C | -0.61480900 | -5.32477500 | -1.90511300 |
| H | 0.42581800  | -5.67253000 | -1.79015200 |
| H | -1.03222900 | -5.82984500 | -2.79962000 |
| H | -0.58926400 | -4.24371200 | -2.12344100 |
| C | -2.83311600 | -5.02126000 | -0.70209400 |
| H | -3.44082800 | -5.45479900 | -1.52205400 |
| H | -3.37638700 | -5.20671800 | 0.23949800  |
| H | -2.79434600 | -3.93056700 | -0.85593700 |
| C | -1.39181600 | -7.06756400 | -0.22146500 |
| H | -0.35337000 | -7.42058800 | -0.10399400 |
| H | -1.91094600 | -7.21344800 | 0.74069000  |
| H | -1.88170500 | -7.73489100 | -0.95970900 |
| H | -0.81877200 | -4.90191300 | 0.32518700  |
| C | -0.33452700 | -4.09984500 | 1.30392300  |
| O | -1.24547200 | -3.04426000 | 1.45253600  |
| C | -0.33630300 | -4.89587900 | 2.59470000  |
| H | 0.63069200  | -3.73694500 | 0.91889100  |
| C | -2.10155200 | -3.29099300 | 2.57721000  |
| C | -1.79547200 | -4.71958900 | 3.04322000  |
| H | 0.35604400  | -4.45544600 | 3.33635100  |
| H | -0.04777600 | -5.94793800 | 2.44839100  |
| H | -1.87162600 | -2.55110400 | 3.36634100  |
| H | -3.15091700 | -3.14936800 | 2.27110800  |
| H | -1.94582300 | -4.85268400 | 4.12428800  |

H            -2.44122600 -5.44128100 2.51794600  
UB3LYP-D3/def2-TZVPP-CPCM(THF)//UB3LYP-D3/def2-SVP-CPCM(THF)  
HF= -390.4090221  
UM06/def2-TZVPP-CPCM(THF)//UB3LYP-D3/def2-SVP-CPCM(THF)  
HF= -390.0778207

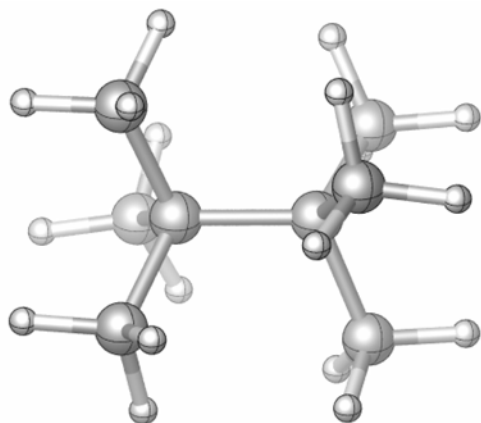

UB3LYP-D3/def2-SVP-CPCM(THF)

Zero-point correction= 0.243588 (Hartree/Particle)

Thermal correction to Energy= 0.253800

Thermal correction to Enthalpy= 0.254744

Thermal correction to Gibbs Free Energy= 0.210503

Sum of electronic and zero-point Energies= -315.255129

Sum of electronic and thermal Energies= -315.244917

Sum of electronic and thermal Enthalpies= -315.243973

Sum of electronic and thermal Free Energies= -315.288214

|   |             |             |             |
|---|-------------|-------------|-------------|
| C | -2.41708000 | -0.14457300 | 0.06622800  |
| C | -0.88402500 | -0.24743600 | -0.08529400 |
| H | -2.74165800 | 0.88150100  | 0.29535000  |
| H | -2.94544800 | -0.47308000 | -0.84217800 |
| H | -2.75610000 | -0.78736300 | 0.89495100  |
| C | -0.51590700 | -1.74621100 | -0.13042400 |
| C | -0.24575200 | 0.35513700  | 1.18492900  |
| H | 0.55546200  | -1.90306300 | -0.32988500 |
| H | -0.74310900 | -2.21871100 | 0.83915500  |
| H | -1.08705800 | -2.28817800 | -0.89894500 |
| H | -0.70779400 | -0.08687200 | 2.08277100  |
| H | 0.83422400  | 0.15250100  | 1.24049600  |
| H | -0.39027400 | 1.44511100  | 1.24399800  |
| C | -0.38354500 | 0.50698200  | -1.39515200 |
| C | -1.02342000 | 1.90725400  | -1.51033200 |
| C | 1.14931300  | 0.69016800  | -1.38276200 |
| C | -0.75168200 | -0.28406100 | -2.66911300 |
| H | -2.10296400 | 1.85183000  | -1.71534600 |
| H | -0.88128800 | 2.50327700  | -0.59565000 |
| H | -0.56103700 | 2.46448200  | -2.34135800 |
| H | 1.67895000  | -0.26049400 | -1.21503400 |
| H | 1.48707500  | 1.08812900  | -2.35358700 |
| H | 1.47371500  | 1.40115000  | -0.60831800 |
| H | -0.52342700 | 0.31783100  | -3.56385600 |

H -0.18082000 -1.22083700 -2.75183900  
H -1.82331800 -0.53448200 -2.70559900  
UB3LYP-D3/def2-TZVPP-CPCM(THF)//UB3LYP-D3/def2-SVP-CPCM(THF)  
HF= -315.8529126  
UM06/def2-TZVPP-CPCM(THF)//UB3LYP-D3/def2-SVP-CPCM(THF)  
HF= -315.5614974

Figure S12

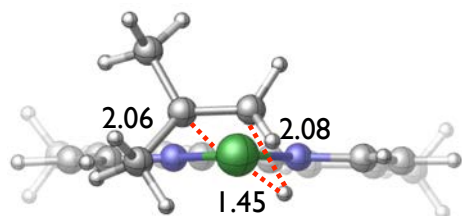

UB3LYP-D3/def2-SVP-CPCM(THF)

Zero-point correction= 0.328127 (Hartree/Particle)

Thermal correction to Energy= 0.347968

Thermal correction to Enthalpy= 0.348913

Thermal correction to Gibbs Free Energy= 0.279623

Sum of electronic and zero-point Energies= -2239.220375

Sum of electronic and thermal Energies= -2239.200534

Sum of electronic and thermal Enthalpies= -2239.199590

Sum of electronic and thermal Free Energies= -2239.268880

|    |             |             |             |
|----|-------------|-------------|-------------|
| Ni | -4.61321300 | 0.86810700  | -0.83470900 |
| C  | -5.09920600 | 2.52182300  | 0.29792100  |
| C  | -4.55216600 | 2.36939500  | 1.70282700  |
| H  | -4.74404000 | 1.36415800  | 2.10736000  |
| H  | -3.46927900 | 2.55485400  | 1.75648600  |
| H  | -5.03615100 | 3.10331500  | 2.37489000  |
| C  | -6.24127500 | 1.79571800  | -0.07944700 |
| H  | -5.62378300 | 0.94464700  | -1.87805000 |
| H  | -6.68945700 | 1.07302700  | 0.61440600  |
| H  | -6.94016700 | 2.20648100  | -0.81286700 |
| C  | -4.78498200 | 3.83112300  | -0.39198000 |
| H  | -3.70030100 | 4.01587900  | -0.45027500 |
| H  | -5.18660100 | 3.85527800  | -1.41595400 |
| H  | -5.21989000 | 4.68057300  | 0.16788600  |
| C  | -2.20522700 | -0.58647000 | -0.60403900 |
| C  | -0.85255000 | -0.89231600 | -0.31440800 |
| C  | 0.03915300  | 0.09547400  | 0.07013200  |
| C  | -0.46446300 | 1.42555500  | 0.15669300  |
| C  | -1.79703900 | 1.66488700  | -0.11083000 |
| C  | -3.17470400 | -1.53453700 | -1.08989400 |
| C  | -2.90900100 | -2.88733300 | -1.42387700 |
| C  | -3.92227300 | -3.72644200 | -1.85676900 |
| C  | -5.23232100 | -3.17313400 | -1.96101900 |
| C  | -5.42983800 | -1.83926700 | -1.66462100 |
| H  | -0.50950600 | -1.92534500 | -0.39587200 |
| H  | 0.19020400  | 2.25523600  | 0.43172100  |
| H  | -2.19733800 | 2.67733000  | -0.04657800 |
| H  | -1.88994200 | -3.26940700 | -1.34127500 |

|   |             |             |             |
|---|-------------|-------------|-------------|
| H | -6.07577700 | -3.79000100 | -2.27829500 |
| H | -6.41337500 | -1.37414400 | -1.76261000 |
| N | -2.67878000 | 0.70624200  | -0.47133900 |
| N | -4.44404300 | -1.02209100 | -1.23617000 |
| C | 1.48007800  | -0.19579000 | 0.38774600  |
| H | 1.72097600  | 0.09427000  | 1.42487200  |
| H | 1.72000200  | -1.26210300 | 0.26533200  |
| H | 2.15178000  | 0.38656200  | -0.26590500 |
| C | -3.67659100 | -5.16537400 | -2.22023400 |
| H | -4.31313100 | -5.83586200 | -1.61799400 |
| H | -3.93272000 | -5.35359100 | -3.27696500 |
| H | -2.62705600 | -5.45514600 | -2.06506800 |

UB3LYP-D3/def2-TZVPP-CPCM(THF)//UB3LYP-D3/def2-SVP-CPCM(THF)  
HF= -2240.5636168  
UM06/def2-TZVPP-CPCM(THF)//UB3LYP-D3/def2-SVP-CPCM(THF)  
HF= -2239.8498736



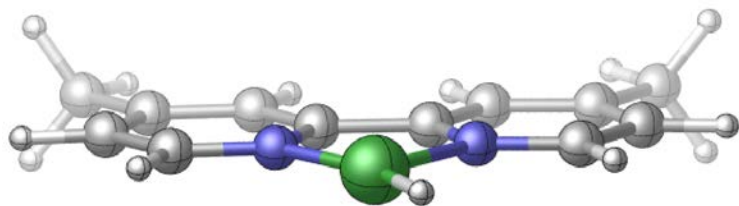

UB3LYP-D3/def2-SVP-CPCM(THF)

Zero-point correction= 0.218542 (Hartree/Particle)

Thermal correction to Energy= 0.233345

Thermal correction to Enthalpy= 0.234289

Thermal correction to Gibbs Free Energy= 0.174716

Sum of electronic and zero-point Energies= -2082.200898

Sum of electronic and thermal Energies= -2082.186094

Sum of electronic and thermal Enthalpies= -2082.185150

Sum of electronic and thermal Free Energies= -2082.244723

|    |             |             |             |
|----|-------------|-------------|-------------|
| Ni | -4.14128400 | 1.35473100  | -1.69261700 |
| H  | -5.44683100 | 2.14366100  | -2.15615700 |
| C  | -1.98417500 | -0.28633800 | -0.86820800 |
| C  | -0.70498300 | -0.64872200 | -0.42793000 |
| C  | 0.27134100  | 0.32654400  | -0.20166200 |
| C  | -0.09836300 | 1.66595300  | -0.43842900 |
| C  | -1.38204500 | 1.95976800  | -0.87425400 |
| C  | -3.07986300 | -1.24022000 | -1.13348300 |
| C  | -2.98621500 | -2.63051500 | -0.98125800 |
| C  | -4.08889600 | -3.44510900 | -1.26067400 |
| C  | -5.26798000 | -2.80868900 | -1.69242600 |
| C  | -5.29004200 | -1.42466400 | -1.82069600 |
| H  | -0.46479800 | -1.69941600 | -0.25909600 |
| H  | 0.61651500  | 2.47707900  | -0.28247700 |
| H  | -1.69463300 | 2.98938000  | -1.06507000 |
| H  | -2.05320000 | -3.08385600 | -0.64411100 |
| H  | -6.16263600 | -3.39015800 | -1.92588200 |
| H  | -6.18629700 | -0.89328500 | -2.15166600 |
| N  | -2.31931600 | 1.01465600  | -1.08971900 |
| N  | -4.22769500 | -0.65399600 | -1.54992000 |
| C  | 1.65392700  | -0.02271100 | 0.27689900  |
| H  | 1.84919000  | 0.42643700  | 1.26505500  |
| H  | 1.79507800  | -1.10967900 | 0.36065200  |
| H  | 2.41867300  | 0.37455100  | -0.41046400 |
| C  | -4.02947500 | -4.94106600 | -1.11192900 |
| H  | -3.05325800 | -5.27716600 | -0.73493400 |
| H  | -4.81014400 | -5.29435300 | -0.41873800 |
| H  | -4.21487300 | -5.43465100 | -2.08017100 |

UB3LYP-D3/def2-TZVPP-CPCM(THF)//UB3LYP-D3/def2-SVP-CPCM(THF)

HF= -2083.2746658

UM06/def2-TZVPP-CPCM(THF)//UB3LYP-D3/def2-SVP-CPCM(THF)

HF= -2082.7071176

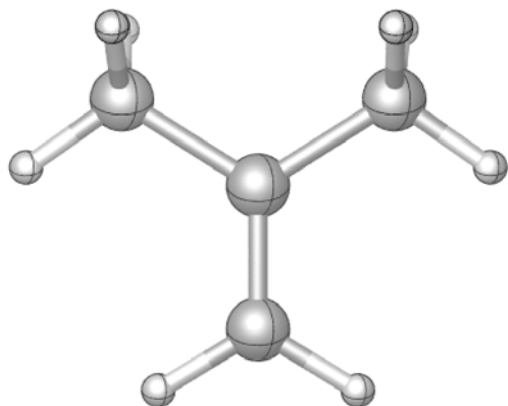

UB3LYP-D3/def2-SVP-CPCM(THF)

Zero-point correction= 0.107040 (Hartree/Particle)

Thermal correction to Energy= 0.112322

Thermal correction to Enthalpy= 0.113267

Thermal correction to Gibbs Free Energy= 0.079765

Sum of electronic and zero-point Energies= -157.012996

Sum of electronic and thermal Energies= -157.007713

Sum of electronic and thermal Enthalpies= -157.006769

Sum of electronic and thermal Free Energies= -157.040270

C -5.45780700 2.07262200 0.23723400

C -5.52946100 0.85899400 1.12932400

H -6.18072200 0.07439500 0.71608900

H -4.52384500 0.42950900 1.28546300

H -5.90716300 1.13242700 2.13066000

C -6.12859400 2.15207900 -0.92172300

H -6.76266200 1.33174500 -1.27263500

H -6.06610800 3.04018900 -1.55848800

C -4.57879200 3.19055500 0.73860400

H -3.54036500 2.83933200 0.87450700

H -4.56607400 4.05129000 0.05348300

H -4.91872000 3.53998000 1.72977100

UB3LYP-D3/def2-TZVPP-CPCM(THF)//UB3LYP-D3/def2-SVP-CPCM(THF)

HF= -157.3001298

UM06/def2-TZVPP-CPCM(THF)//UB3LYP-D3/def2-SVP-CPCM(THF)

HF= -157.1516226

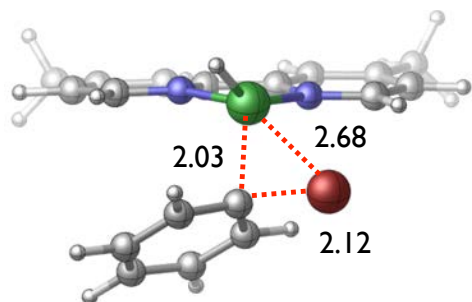

UB3LYP-D3/def2-SVP-CPCM(THF)

Zero-point correction= 0.309716 (Hartree/Particle)

Thermal correction to Energy= 0.331219

Thermal correction to Enthalpy= 0.332163

Thermal correction to Gibbs Free Energy= 0.255765

Sum of electronic and zero-point Energies= -4887.483265

Sum of electronic and thermal Energies= -4887.461762

Sum of electronic and thermal Enthalpies= -4887.460818

Sum of electronic and thermal Free Energies= -4887.537216

|    |             |             |             |
|----|-------------|-------------|-------------|
| Ni | -0.79917400 | -0.18317200 | 0.37337300  |
| C  | -1.59750800 | 0.64027300  | -1.29816000 |
| C  | -0.96341900 | 3.22629700  | -2.16800300 |
| C  | -2.36114100 | 1.73785700  | -0.84662200 |
| C  | -0.61544700 | 0.82411200  | -2.29669300 |
| C  | -0.27976900 | 2.11796100  | -2.69156100 |
| C  | -2.01349800 | 3.02495500  | -1.26137200 |
| H  | -3.17246700 | 1.57386600  | -0.13808600 |
| H  | -0.08267700 | -0.03906500 | -2.69625000 |
| H  | 0.52534700  | 2.26263500  | -3.41731900 |
| H  | -2.56944300 | 3.88025800  | -0.86738400 |
| N  | 0.73831700  | 1.17004400  | 0.61386500  |
| C  | 2.88889900  | 2.96658200  | 0.63201800  |
| C  | 0.57718400  | 2.41769300  | 1.06391300  |
| C  | 1.94612800  | 0.78038200  | 0.15858700  |
| C  | 3.03910900  | 1.65625900  | 0.16120700  |
| C  | 1.61503200  | 3.34445000  | 1.08820000  |
| N  | 0.80701100  | -1.25157900 | -0.39748800 |
| C  | 3.15053000  | -2.56636100 | -1.22288500 |
| C  | 0.76597600  | -2.51433900 | -0.84472100 |
| C  | 1.99870400  | -0.61427200 | -0.34700400 |
| C  | 3.17962600  | -1.24773700 | -0.75376000 |
| C  | 1.89886900  | -3.20297600 | -1.26433900 |
| H  | -0.42788700 | 2.66934600  | 1.41062100  |
| H  | 4.00894200  | 1.32914000  | -0.21439100 |
| H  | 1.43146900  | 4.35481000  | 1.45993100  |
| H  | -0.22342900 | -2.97575700 | -0.87505900 |

|    |             |             |             |
|----|-------------|-------------|-------------|
| H  | 4.13164700  | -0.71891900 | -0.70211900 |
| H  | 1.80530400  | -4.23033100 | -1.62269200 |
| Br | -2.58780400 | -1.23666900 | -1.32829200 |
| H  | -0.69604400 | 4.23708700  | -2.48470300 |
| C  | 4.40185400  | -3.28332100 | -1.64903900 |
| H  | 4.66136500  | -4.06629700 | -0.91677400 |
| H  | 4.25605200  | -3.78560800 | -2.61812300 |
| H  | 5.25751200  | -2.59854300 | -1.73256300 |
| C  | 4.04019800  | 3.93441300  | 0.65931400  |
| H  | 3.75413400  | 4.89726400  | 0.20758700  |
| H  | 4.33939300  | 4.14378400  | 1.69999600  |
| H  | 4.91734100  | 3.54304800  | 0.12497400  |
| H  | -1.77995400 | 0.05875200  | 1.64063100  |

UB3LYP-D3/def2-TZVPP-CPCM(THF)//UB3LYP-D3/def2-SVP-CPCM(THF)  
HF= -4889.1966238  
UM06/def2-TZVPP-CPCM(THF)//UB3LYP-D3/def2-SVP-CPCM(THF)  
HF= -4888.3092754

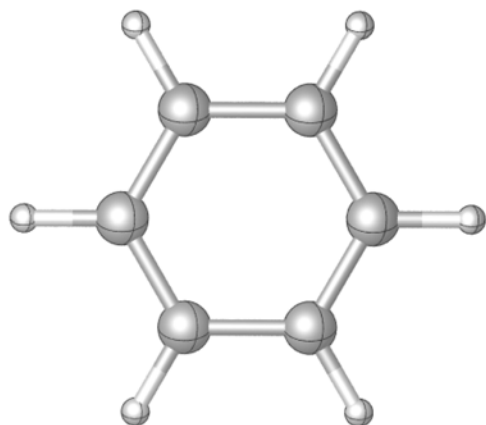

UB3LYP-D3/def2-SVP-CPCM(THF)

Zero-point correction= 0.100501 (Hartree/Particle)

Thermal correction to Energy= 0.104869

Thermal correction to Enthalpy= 0.105813

Thermal correction to Gibbs Free Energy= 0.073041

Sum of electronic and zero-point Energies= -231.991414

Sum of electronic and thermal Energies= -231.987046

Sum of electronic and thermal Enthalpies= -231.986102

Sum of electronic and thermal Free Energies= -232.018875

C -1.78619400 0.38638600 -1.50220400

C -1.08232300 3.09483000 -1.40580500

C -2.51675000 1.27142400 -0.70025300

C -0.70376700 0.85565300 -2.25604600

C -0.35185200 2.20986100 -2.20777100

C -2.16479500 2.62562500 -0.65210600

H -3.36188700 0.90503200 -0.11142400

H -0.13344100 0.16460300 -2.88246100

H 0.49324200 2.57637100 -2.79661600

H -2.73519400 3.31669300 -0.02575100

H -0.80755600 4.15235000 -1.36828900

H -2.06099000 -0.67106600 -1.53988700

UB3LYP-D3/def2-TZVPP-CPCM(THF)//UB3LYP-D3/def2-SVP-CPCM(THF)

HF= -232.3465283

UM06/def2-TZVPP-CPCM(THF)//UB3LYP-D3/def2-SVP-CPCM(THF)

HF= -232.1429457

Figure S14

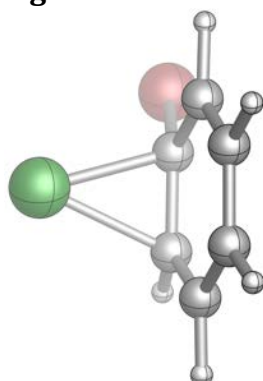

UB3LYP-D3/def2-SVP-CPCM(THF)

Zero-point correction= 0.090677 (Hartree/Particle)

Thermal correction to Energy= 0.098399

Thermal correction to Enthalpy= 0.099343

Thermal correction to Gibbs Free Energy= 0.055641

Sum of electronic and zero-point Energies= -4313.276593

Sum of electronic and thermal Energies= -4313.268871

Sum of electronic and thermal Enthalpies= -4313.267927

Sum of electronic and thermal Free Energies= -4313.311630

|    |             |             |             |
|----|-------------|-------------|-------------|
| C  | -3.04310700 | 0.16108800  | 1.66008100  |
| C  | -2.34670500 | -0.85049300 | 0.93821400  |
| C  | -2.07481300 | -0.67622800 | -0.45526600 |
| C  | -2.52185500 | 0.51012300  | -1.09572800 |
| C  | -3.19602600 | 1.48917000  | -0.38006500 |
| C  | -3.44095600 | 1.31673200  | 1.00062000  |
| Br | -2.20662100 | -2.61196300 | 1.72318600  |
| H  | -1.71985100 | -1.51667200 | -1.05788600 |
| H  | -3.26327800 | 0.01302200  | 2.71784300  |
| H  | -3.96559900 | 2.09429900  | 1.56028000  |
| H  | -3.54390700 | 2.39323100  | -0.88348800 |
| H  | -2.34869300 | 0.62453200  | -2.16777600 |
| Ni | -0.45364000 | -0.16362000 | 0.82203800  |

UB3LYP-D3/def2-TZVPP-CPCM(THF)//UB3LYP-D3/def2-SVP-CPCM(THF)

HF= -4314.14952807

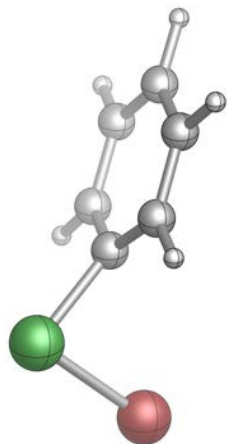

UB3LYP-D3/def2-SVP-CPCM(THF)

Zero-point correction= 0.090158 (Hartree/Particle)  
 Thermal correction to Energy= 0.098267  
 Thermal correction to Enthalpy= 0.099211  
 Thermal correction to Gibbs Free Energy= 0.054044  
 Sum of electronic and zero-point Energies= -4313.273303  
 Sum of electronic and thermal Energies= -4313.265194  
 Sum of electronic and thermal Enthalpies= -4313.264250  
 Sum of electronic and thermal Free Energies= -4313.309417

|    |             |             |             |
|----|-------------|-------------|-------------|
| C  | -2.63732100 | 0.92656200  | 1.28790500  |
| C  | -1.85059900 | -0.10489600 | 0.78343200  |
| C  | -1.92216100 | -0.59087000 | -0.51925500 |
| C  | -2.75164300 | 0.10387300  | -1.41014300 |
| C  | -3.51157500 | 1.19149400  | -0.96224800 |
| C  | -3.45850300 | 1.60214200  | 0.37557400  |
| Br | -1.50891500 | -2.09449000 | 2.65210700  |
| H  | -1.34389100 | -1.45894000 | -0.84267800 |
| H  | -2.60359000 | 1.21394500  | 2.34051600  |
| H  | -4.06526100 | 2.44163400  | 0.72291300  |
| H  | -4.17022700 | 1.71302600  | -1.66029900 |
| H  | -2.80843700 | -0.22077900 | -2.45173900 |
| Ni | -0.21539600 | -0.46360600 | 1.69357600  |

UB3LYP-D3/def2-TZVPP-CPCM(THF)//UB3LYP-D3/def2-SVP-CPCM(THF)  
 HF= -4314.14216150



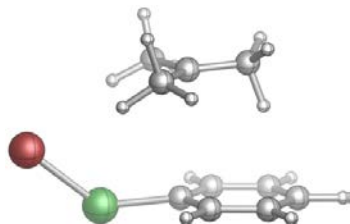

UB3LYP-D3/def2-SVP-CPCM(THF)

Zero-point correction= 0.208392 (Hartree/Particle)  
 Thermal correction to Energy= 0.223964  
 Thermal correction to Enthalpy= 0.224908  
 Thermal correction to Gibbs Free Energy= 0.162774  
 Sum of electronic and zero-point Energies= -4470.909091  
 Sum of electronic and thermal Energies= -4470.893518  
 Sum of electronic and thermal Enthalpies= -4470.892574  
 Sum of electronic and thermal Free Energies= -4470.954708

|    |             |             |             |
|----|-------------|-------------|-------------|
| Ni | -5.69003100 | 0.64818100  | 0.19683600  |
| C  | -5.31262800 | 2.49967100  | 0.66139700  |
| C  | -6.23448800 | 3.52426700  | 0.36697900  |
| C  | -4.17964800 | 2.83013800  | 1.43170000  |
| C  | -6.03777200 | 4.83176200  | 0.82555600  |
| H  | -7.12224700 | 3.30081900  | -0.23322700 |
| C  | -3.97330700 | 4.13463800  | 1.89512600  |
| H  | -3.44227800 | 2.05887000  | 1.67670000  |
| C  | -4.90263100 | 5.13978700  | 1.58920300  |
| H  | -6.76310200 | 5.61325100  | 0.58422500  |
| H  | -3.08705600 | 4.37265000  | 2.48928000  |
| H  | -4.74153100 | 6.16071500  | 1.94406100  |
| Br | -5.68614100 | -0.46437700 | -1.89372500 |
| C  | -3.77679300 | 3.39391200  | -1.98984200 |
| C  | -2.89096800 | 2.24435300  | -1.77541200 |
| H  | -3.42256200 | 1.28372100  | -1.75682300 |
| H  | -2.23827200 | 2.24155400  | -2.67717100 |
| H  | -2.22444500 | 2.38095000  | -0.91340100 |
| C  | -3.36068800 | 4.72070500  | -1.55843600 |
| H  | -3.85202000 | 4.85510400  | -0.56365600 |
| H  | -2.28012400 | 4.80823100  | -1.38558500 |
| H  | -3.76455200 | 5.52248000  | -2.19272700 |
| C  | -5.01632300 | 3.22690400  | -2.75395700 |
| H  | -5.49823400 | 2.25608700  | -2.56766100 |
| H  | -5.70555800 | 4.07386700  | -2.65002300 |
| H  | -4.67682000 | 3.20337300  | -3.81377000 |

UB3LYP-D3/def2-TZVPP-CPCM(THF)//UB3LYP-D3/def2-SVP-CPCM(THF)

HF= -4472.07517251

## DMA

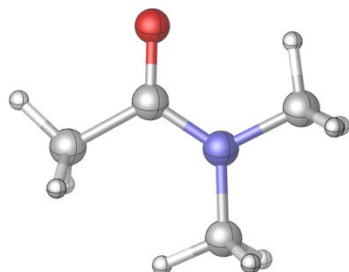

UB3LYP-D3/def2-SVP-CPCM(THF)

$\langle S^2 \rangle = 0.0000$

Zero-point correction= 0.129574 (Hartree/Particle)

Thermal correction to Energy= 0.137214

Thermal correction to Enthalpy= 0.138159

Thermal correction to Gibbs Free Energy= 0.097818

Sum of electronic and zero-point Energies= -287.506478

Sum of electronic and thermal Energies= -287.498838

Sum of electronic and thermal Enthalpies= -287.497894

Sum of electronic and thermal Free Energies= -287.538234

C -2.77549400 1.10576800 0.17344400

O -3.37576400 0.04098600 0.30285000

N -1.42066200 1.15712500 -0.02483700

C -3.53169900 2.42604000 0.23195600

H -3.17999200 3.06144900 1.05983000

H -3.42570500 3.00001200 -0.70177600

H -4.59143000 2.19194000 0.38873300

C -0.64344600 2.37040000 -0.20318800

H -1.25639800 3.26981200 -0.09049600

H 0.17034500 2.41803800 0.54165400

H -0.18014800 2.39406000 -1.20606400

C -0.65581000 -0.07661500 -0.10272300

H -1.32981400 -0.92785900 0.04169300

H -0.16180500 -0.16647800 -1.08632700

H 0.12810200 -0.09653400 0.67449200

UB3LYP-D3/def2-TZVPP-CPCM(THF)// UB3LYP-D3/def2-SVP-CPCM(THF)

HF= -287.968183

UM06/def2-TZVPP-CPCM(THF)// UB3LYP-D3/def2-SVP-CPCM(THF)

HF= -287.7556375

## <sup>2</sup>A-DMA-N

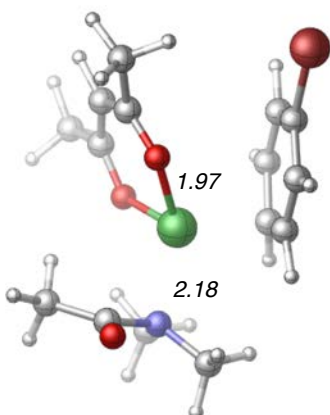

UB3LYP-D3/def2-SVP-CPCM(THF)

Zero-point correction= 0.334610 (Hartree/Particle)

Thermal correction to Energy= 0.359997

Thermal correction to Enthalpy= 0.360941

Thermal correction to Gibbs Free Energy= 0.276130

Sum of electronic and zero-point Energies= -4945.881912

Sum of electronic and thermal Energies= -4945.856525

Sum of electronic and thermal Enthalpies= -4945.855581

Sum of electronic and thermal Free Energies= -4945.940391

|    |             |             |             |
|----|-------------|-------------|-------------|
| C  | -2.38385200 | 1.54700000  | -1.19046200 |
| O  | -2.56104700 | 1.50095400  | -2.39614100 |
| N  | -1.37287000 | 0.74453500  | -0.58367600 |
| C  | -3.17663100 | 2.47036200  | -0.29399500 |
| H  | -3.55728500 | 1.94507700  | 0.59047500  |
| H  | -2.53641800 | 3.30063700  | 0.04600600  |
| H  | -4.00683300 | 2.87792300  | -0.88264400 |
| C  | -0.33484600 | 0.28781600  | -1.52187900 |
| H  | 0.34963800  | 1.11482100  | -1.77797300 |
| H  | 0.24348600  | -0.51919100 | -1.05542400 |
| H  | -0.80658500 | -0.07658600 | -2.43881000 |
| C  | -0.81492300 | 1.17330700  | 0.71106500  |
| H  | -0.21818800 | 2.09533400  | 0.60455600  |
| H  | -1.61496000 | 1.31223300  | 1.44292300  |
| H  | -0.16279700 | 0.37309800  | 1.08604200  |
| Ni | -2.85937700 | -0.81031400 | -0.20266100 |
| C  | -1.59741300 | -2.49138000 | 0.12393600  |
| C  | -1.82822800 | -2.75913400 | -1.24900300 |
| C  | -2.83693300 | -3.65734500 | -1.64005400 |
| C  | -3.60617300 | -4.28244600 | -0.66447200 |
| C  | -3.38749600 | -4.04805600 | 0.70562100  |
| C  | -2.38182400 | -3.17159900 | 1.09077500  |
| H  | -0.68264900 | -1.98414900 | 0.44480200  |
| H  | -1.16989500 | -2.34103900 | -2.01103100 |

|    |             |             |             |
|----|-------------|-------------|-------------|
| H  | -4.00662500 | -4.54478200 | 1.45386400  |
| H  | -2.19922200 | -2.99115700 | 2.15173500  |
| H  | -3.01374000 | -3.85569400 | -2.69803300 |
| Br | -5.00080200 | -5.48418200 | -1.18944900 |
| C  | -5.66791900 | -1.42806900 | 0.14358400  |
| O  | -4.68295600 | -1.40061200 | -0.65387600 |
| C  | -5.64863800 | -0.98083500 | 1.48607200  |
| H  | -6.56505600 | -1.09680800 | 2.06563100  |
| C  | -4.56163700 | -0.34030500 | 2.11684600  |
| O  | -3.43375200 | -0.09849100 | 1.58088900  |
| C  | -6.94534600 | -2.01407900 | -0.41916700 |
| H  | -6.76202500 | -3.06891200 | -0.68247200 |
| H  | -7.79456700 | -1.95707900 | 0.27521100  |
| H  | -7.20169600 | -1.49108000 | -1.35446600 |
| C  | -4.71613900 | 0.13944400  | 3.54551000  |
| H  | -5.67601600 | -0.14327700 | 3.99848000  |
| H  | -3.89140200 | -0.26777100 | 4.15242000  |
| H  | -4.61752500 | 1.23764400  | 3.56964300  |

UB3LYP-D3/def2-TZVPP-CPCM(THF)// UB3LYP-D3/def2-SVP-CPCM(THF)  
HF= -4947.7109019  
UM06/def2-TZVPP-CPCM(THF)// UB3LYP-D3/def2-SVP-CPCM(THF)  
HF= -4946.8406731

## <sup>2</sup>A-DMA-O

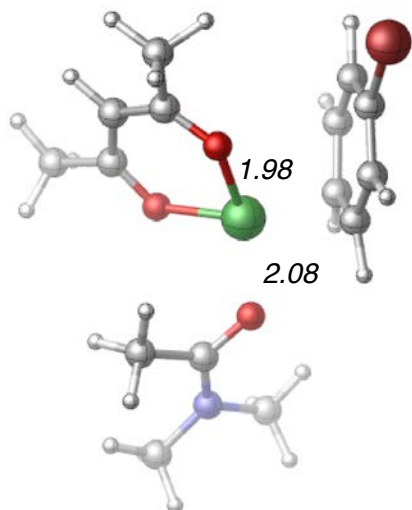

UB3LYP-D3/def2-SVP-CPCM(THF)

Zero-point correction= 0.333954 (Hartree/Particle)

Thermal correction to Energy= 0.359909

Thermal correction to Enthalpy= 0.360854

Thermal correction to Gibbs Free Energy= 0.272367

Sum of electronic and zero-point Energies= -4945.890866

Sum of electronic and thermal Energies= -4945.864911

Sum of electronic and thermal Enthalpies= -4945.863966

Sum of electronic and thermal Free Energies= -4945.952453

|    |             |             |             |
|----|-------------|-------------|-------------|
| C  | -0.86706700 | 1.17746200  | -0.95642900 |
| O  | -1.02443200 | -0.05873500 | -1.01941100 |
| N  | 0.37547300  | 1.70557900  | -0.88856000 |
| C  | -2.05802200 | 2.11220400  | -0.97006500 |
| H  | -2.12290700 | 2.68122800  | -0.03129400 |
| H  | -1.99841800 | 2.82320400  | -1.80761900 |
| H  | -2.96704100 | 1.50923000  | -1.06437000 |
| C  | 1.54849100  | 0.84014400  | -0.89418900 |
| H  | 2.19553900  | 1.08629000  | -1.75258200 |
| H  | 2.13121500  | 0.98605900  | 0.03045300  |
| H  | 1.23403000  | -0.20563700 | -0.96489100 |
| C  | 0.66981200  | 3.13028300  | -0.83989000 |
| H  | 1.19171200  | 3.44869700  | -1.75861100 |
| H  | -0.23689200 | 3.73163700  | -0.72865300 |
| H  | 1.32934300  | 3.34351900  | 0.01719400  |
| Ni | -2.70280800 | -1.11931500 | -0.39915300 |
| C  | -1.58501700 | -2.90884700 | -0.31627200 |
| C  | -2.03253700 | -2.81770200 | -1.66571600 |
| C  | -3.15090700 | -3.57289500 | -2.09104400 |
| C  | -3.81874500 | -4.37156000 | -1.17714900 |
| C  | -3.38044100 | -4.49446100 | 0.15961000  |

|    |             |             |             |
|----|-------------|-------------|-------------|
| C  | -2.26391100 | -3.78563400 | 0.57266500  |
| H  | -0.60565900 | -2.51218800 | -0.03522000 |
| H  | -1.42548700 | -2.29945900 | -2.41173600 |
| H  | -3.91793600 | -5.14219300 | 0.85425500  |
| H  | -1.90366000 | -3.89625500 | 1.59837400  |
| H  | -3.49011500 | -3.51044800 | -3.12624800 |
| Br | -5.38985200 | -5.32520000 | -1.72296400 |
| C  | -5.45629800 | -1.19052300 | 0.55674200  |
| O  | -4.63582000 | -1.55383600 | -0.33846700 |
| C  | -5.15679300 | -0.35561800 | 1.65824300  |
| H  | -5.96562100 | -0.13106600 | 2.35471000  |
| C  | -3.90139900 | 0.24895600  | 1.89761700  |
| O  | -2.86127100 | 0.09400400  | 1.18780900  |
| C  | -6.86784600 | -1.71878700 | 0.39092700  |
| H  | -6.83210900 | -2.81883500 | 0.33026100  |
| H  | -7.54664700 | -1.41808400 | 1.20076700  |
| H  | -7.27395600 | -1.36419700 | -0.57092500 |
| C  | -3.74925500 | 1.18362100  | 3.08258300  |
| H  | -4.64679800 | 1.23904000  | 3.71390000  |
| H  | -2.89252300 | 0.85729700  | 3.69413900  |
| H  | -3.50941300 | 2.19501100  | 2.71330100  |

UB3LYP-D3/def2-TZVPP-CPCM(THF)// UB3LYP-D3/def2-SVP-CPCM(THF)  
HF= -4947.7206989  
UM06/def2-TZVPP-CPCM(THF)// UB3LYP-D3/def2-SVP-CPCM(THF)  
HF= -4946.8519092

## <sup>2</sup>A-DMA'-conf1

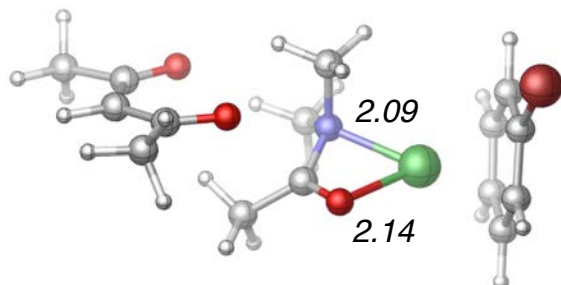

UB3LYP-D3/def2-SVP-CPCM(THF)

Zero-point correction= 0.333515 (Hartree/Particle)  
Thermal correction to Energy= 0.359366  
Thermal correction to Enthalpy= 0.360310  
Thermal correction to Gibbs Free Energy= 0.272439  
Sum of electronic and zero-point Energies= -4945.808783  
Sum of electronic and thermal Energies= -4945.782931  
Sum of electronic and thermal Enthalpies= -4945.781987  
Sum of electronic and thermal Free Energies= -4945.869858

|    |             |             |             |
|----|-------------|-------------|-------------|
| C  | -1.76896800 | -1.05834000 | -1.69978000 |
| O  | -2.82325200 | -1.09231900 | -1.06125600 |
| N  | -0.58437700 | -0.92091500 | -0.90100900 |
| C  | -1.66946700 | -1.35361400 | -3.15555400 |
| H  | -0.93675900 | -0.68494500 | -3.62107200 |
| H  | -1.34230900 | -2.39886300 | -3.28715000 |
| H  | -2.65950300 | -1.23344400 | -3.60939200 |
| C  | 0.66491700  | -1.47728000 | -1.45110200 |
| H  | 1.03663800  | -0.85964200 | -2.28180700 |
| H  | 1.40664000  | -1.48964300 | -0.64016800 |
| H  | 0.49895100  | -2.51356400 | -1.77291100 |
| C  | -0.37715200 | 0.44648200  | -0.33981100 |
| H  | 0.04488100  | 1.08654600  | -1.12503300 |
| H  | -1.34179300 | 0.85730100  | -0.02381000 |
| H  | 0.29271400  | 0.35645500  | 0.52685200  |
| Ni | -1.69568400 | -1.88151400 | 0.58388000  |
| C  | -1.09472400 | -3.69294800 | 1.63628900  |
| C  | -2.50423200 | -3.59613200 | 1.66638100  |
| C  | -3.12291600 | -2.47049000 | 2.25486800  |
| C  | -2.33578900 | -1.46444700 | 2.85918700  |
| C  | -0.93345900 | -1.54421600 | 2.82530700  |
| C  | -0.32220300 | -2.64999500 | 2.19317900  |
| H  | -0.60804800 | -4.55054200 | 1.17173200  |
| H  | -3.12287000 | -4.37377000 | 1.21740000  |
| H  | -0.32313000 | -0.75156700 | 3.25781700  |
| H  | 0.76606200  | -2.68901400 | 2.12960900  |
| H  | -4.20838700 | -2.37567100 | 2.23749800  |
| Br | -3.18322100 | 0.01458400  | 3.69556100  |

|   |             |            |             |
|---|-------------|------------|-------------|
| C | -2.17004800 | 1.92339200 | -3.58430000 |
| O | -2.10679600 | 1.43491100 | -2.43352100 |
| C | -1.12117800 | 1.99559600 | -4.54397800 |
| H | -1.36831500 | 2.44927000 | -5.50674100 |
| C | 0.22430400  | 1.56901900 | -4.36536700 |
| O | 0.71147400  | 1.04080100 | -3.33817400 |
| C | -3.53208000 | 2.49251800 | -4.00121100 |
| H | -3.85742000 | 3.22898500 | -3.24757500 |
| H | -3.54184800 | 2.96506900 | -4.99459900 |
| H | -4.27716100 | 1.67856400 | -3.98559300 |
| C | 1.18034500  | 1.76458300 | -5.54801300 |
| H | 0.72798600  | 2.26269900 | -6.41825500 |
| H | 2.05205800  | 2.34956500 | -5.20985000 |
| H | 1.56650400  | 0.77976400 | -5.86168700 |

UB3LYP-D3/def2-TZVPP-CPCM(THF)// UB3LYP-D3/def2-SVP-CPCM(THF)  
HF= -4947.6428298  
UM06/def2-TZVPP-CPCM(THF)// UB3LYP-D3/def2-SVP-CPCM(THF)  
HF= -4946.781502



## <sup>2</sup>A-DMA'-conf2

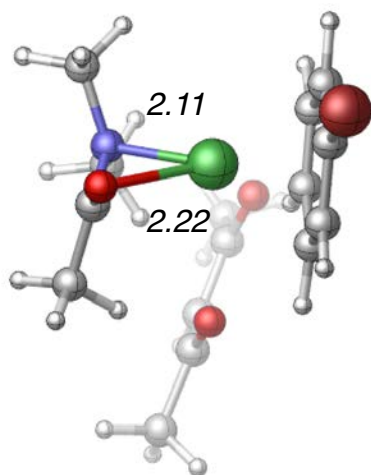

UB3LYP-D3/def2-SVP-CPCM(THF)

Zero-point correction= 0.333505 (Hartree/Particle)

Thermal correction to Energy= 0.359314

Thermal correction to Enthalpy= 0.360258

Thermal correction to Gibbs Free Energy= 0.274476

Sum of electronic and zero-point Energies= -4945.816723

Sum of electronic and thermal Energies= -4945.790914

Sum of electronic and thermal Enthalpies= -4945.789970

Sum of electronic and thermal Free Energies= -4945.875752

|    |             |             |             |
|----|-------------|-------------|-------------|
| C  | -1.88767300 | -0.84033800 | -1.04841300 |
| O  | -2.60783000 | -0.12550100 | -0.32523300 |
| N  | -0.51147500 | -0.89937600 | -0.73734300 |
| C  | -2.41367300 | -1.63218500 | -2.20696500 |
| H  | -1.85094300 | -1.39745200 | -3.12329500 |
| H  | -2.29278700 | -2.71307000 | -2.00725900 |
| H  | -3.47479500 | -1.38929500 | -2.33665700 |
| C  | 0.36458600  | -1.82564000 | -1.47047100 |
| H  | 0.60359700  | -1.43086600 | -2.47193300 |
| H  | 1.29135100  | -1.94890000 | -0.89699700 |
| H  | -0.10477800 | -2.81395900 | -1.52797000 |
| C  | 0.14916000  | 0.33936700  | -0.28466600 |
| H  | 0.59081300  | 0.86485400  | -1.14804000 |
| H  | -0.58281200 | 0.98695400  | 0.20944900  |
| H  | 0.94454500  | 0.08248800  | 0.42718100  |
| Ni | -1.57854600 | -1.64404200 | 0.92855200  |
| C  | -0.79633600 | -3.62215300 | 1.45757300  |
| C  | -2.20485100 | -3.71757600 | 1.42065400  |
| C  | -2.99164900 | -2.89024200 | 2.24863300  |
| C  | -2.36196500 | -1.98314200 | 3.13235800  |
| C  | -0.95844600 | -1.88392400 | 3.19573600  |
| C  | -0.18778600 | -2.70092100 | 2.33966500  |

|    |             |             |             |
|----|-------------|-------------|-------------|
| H  | -0.18540400 | -4.18833100 | 0.74267700  |
| H  | -2.66798900 | -4.38845500 | 0.69781200  |
| H  | -0.48285100 | -1.17070700 | 3.86834800  |
| H  | 0.89873400  | -2.59778600 | 2.33882400  |
| H  | -4.07943500 | -2.92305100 | 2.19034500  |
| Br | -3.43403700 | -0.86500700 | 4.23749400  |
| C  | -0.95743000 | -5.24687700 | -2.30010800 |
| O  | -1.46421300 | -4.53735600 | -1.39076400 |
| C  | 0.40181000  | -5.63448900 | -2.40272300 |
| H  | 0.67614500  | -6.22996200 | -3.27663100 |
| C  | 1.44981000  | -5.33198600 | -1.48222200 |
| O  | 1.35003400  | -4.70111100 | -0.40715000 |
| C  | -1.90361400 | -5.68993500 | -3.41763500 |
| H  | -2.24358200 | -4.79740500 | -3.97143400 |
| H  | -1.45719000 | -6.39744000 | -4.13178100 |
| H  | -2.80241400 | -6.14381400 | -2.96898600 |
| C  | 2.85423500  | -5.82774200 | -1.84744000 |
| H  | 2.90314100  | -6.40103600 | -2.78479600 |
| H  | 3.52921700  | -4.95856300 | -1.92525300 |
| H  | 3.23930700  | -6.45079100 | -1.02296600 |

UB3LYP-D3/def2-TZVPP-CPCM(THF)// UB3LYP-D3/def2-SVP-CPCM(THF)  
HF= -4947.6480744  
UM06/def2-TZVPP-CPCM(THF)// UB3LYP-D3/def2-SVP-CPCM(THF)  
HF= -4946.7844496

## <sup>2</sup>C-DMA-O

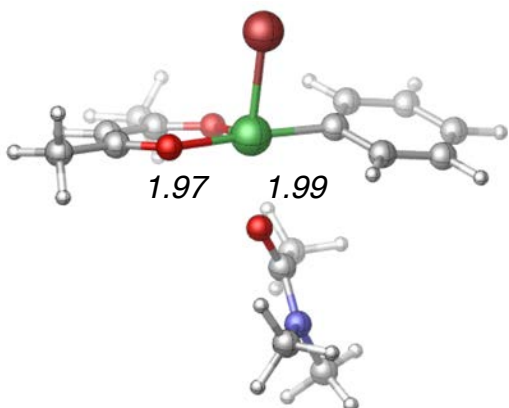

UB3LYP-D3/def2-SVP-CPCM(THF)

Zero-point correction= 0.335220 (Hartree/Particle)

Thermal correction to Energy= 0.360904

Thermal correction to Enthalpy= 0.361848

Thermal correction to Gibbs Free Energy= 0.275250

Sum of electronic and zero-point Energies= -4945.908362

Sum of electronic and thermal Energies= -4945.882678

Sum of electronic and thermal Enthalpies= -4945.881734

Sum of electronic and thermal Free Energies= -4945.968331

|    |             |             |             |
|----|-------------|-------------|-------------|
| C  | -2.72312300 | 0.16404400  | -0.21128400 |
| O  | -1.94642200 | -0.57518600 | -0.86605100 |
| N  | -2.21526200 | 1.05771300  | 0.65247600  |
| C  | -4.21765800 | 0.07104800  | -0.37844300 |
| H  | -4.65738900 | -0.43891400 | 0.49349000  |
| H  | -4.68111300 | 1.06314300  | -0.47105600 |
| H  | -4.42823600 | -0.52882300 | -1.26950100 |
| C  | -3.05005100 | 1.95397900  | 1.44806100  |
| H  | -2.48680000 | 2.25413600  | 2.34170300  |
| H  | -3.31813700 | 2.86365200  | 0.88478000  |
| H  | -3.96799200 | 1.45619400  | 1.78328200  |
| C  | -0.77110100 | 1.22317500  | 0.79533900  |
| H  | -0.49927800 | 2.27675700  | 0.62342000  |
| H  | -0.45500500 | 0.94083600  | 1.81257700  |
| H  | -0.25444200 | 0.59111300  | 0.06665600  |
| Ni | -2.13583600 | -2.30617300 | -1.82492900 |
| C  | -3.38599700 | -3.35898200 | 1.99830200  |
| C  | -2.61469400 | -3.00223900 | 0.88261600  |
| C  | -3.20029800 | -3.02036800 | -0.38301800 |
| C  | -4.52367500 | -3.41253300 | -0.56565600 |
| C  | -5.28795800 | -3.76754100 | 0.55458700  |
| C  | -4.72306500 | -3.73915900 | 1.83541000  |
| H  | -2.93628800 | -3.33712600 | 2.99500900  |
| H  | -1.57211100 | -2.69925400 | 1.01066300  |

|    |             |             |             |
|----|-------------|-------------|-------------|
| H  | -4.95718000 | -3.41711400 | -1.56654900 |
| H  | -6.33158600 | -4.06686500 | 0.42185700  |
| H  | -5.32322900 | -4.01714000 | 2.70561000  |
| Br | -1.57001500 | -4.55993400 | -2.32136400 |
| C  | -3.62262900 | -1.35164500 | -4.12517800 |
| O  | -3.69114100 | -1.86408700 | -2.95889500 |
| C  | -2.44511800 | -0.99835600 | -4.80590200 |
| H  | -2.54811400 | -0.57952300 | -5.80649000 |
| C  | -1.13753900 | -1.12968700 | -4.28123200 |
| O  | -0.85029900 | -1.59082900 | -3.13839600 |
| C  | -4.96290800 | -1.11180700 | -4.78276300 |
| H  | -5.53193500 | -0.38740400 | -4.17682500 |
| H  | -4.87724100 | -0.73298200 | -5.80965800 |
| H  | -5.53811100 | -2.05118400 | -4.78337100 |
| C  | 0.04290300  | -0.70039700 | -5.12368000 |
| H  | -0.25102200 | -0.25180500 | -6.08169000 |
| H  | 0.65229600  | 0.01769300  | -4.55237700 |
| H  | 0.67916200  | -1.57992700 | -5.31529200 |

UB3LYP-D3/def2-TZVPP-CPCM(THF)// UB3LYP-D3/def2-SVP-CPCM(THF)  
HF= -4947.7369949  
UM06/def2-TZVPP-CPCM(THF)// UB3LYP-D3/def2-SVP-CPCM(THF)  
HF= -4946.8553074

## <sup>2</sup>C-DMA'-conf1

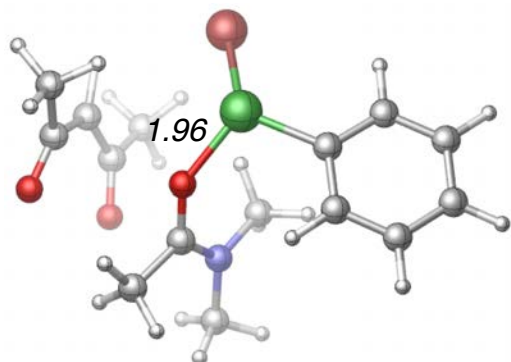

UB3LYP-D3/def2-SVP-CPCM(THF)

Zero-point correction= 0.332583 (Hartree/Particle)

Thermal correction to Energy= 0.359318

Thermal correction to Enthalpy= 0.360262

Thermal correction to Gibbs Free Energy= 0.270529

Sum of electronic and zero-point Energies= -4945.848754

Sum of electronic and thermal Energies= -4945.822019

Sum of electronic and thermal Enthalpies= -4945.821075

Sum of electronic and thermal Free Energies= -4945.910808

|    |             |             |             |
|----|-------------|-------------|-------------|
| C  | -0.46249000 | -1.46454300 | -4.21905300 |
| O  | -1.34334000 | -0.66262100 | -3.80734000 |
| N  | 0.52565700  | -1.90817000 | -3.43606900 |
| C  | -0.52213100 | -1.90221900 | -5.65882300 |
| H  | 0.39506000  | -1.59029400 | -6.17737700 |
| H  | -0.63077100 | -2.99403300 | -5.74388900 |
| H  | -1.37721000 | -1.40913600 | -6.13144800 |
| C  | 1.58082300  | -2.79211400 | -3.92336500 |
| H  | 2.43412700  | -2.19163500 | -4.27828900 |
| H  | 1.91214400  | -3.43893300 | -3.09925300 |
| H  | 1.22907500  | -3.43654500 | -4.73540200 |
| C  | 0.73339300  | -1.37632900 | -2.09107200 |
| H  | 1.81332300  | -1.30158400 | -1.90572000 |
| H  | 0.29755800  | -0.37667300 | -1.99651800 |
| H  | 0.27365300  | -2.02967400 | -1.33424600 |
| Ni | -2.33094100 | -0.14263900 | -2.20039400 |
| C  | -2.74566800 | -2.84195600 | 1.08050100  |
| C  | -2.61783000 | -1.68172200 | 0.30469400  |
| C  | -2.54896800 | -1.74000000 | -1.10003100 |
| C  | -2.61071300 | -3.01274100 | -1.70061100 |
| C  | -2.73837300 | -4.17978900 | -0.93515800 |
| C  | -2.80601000 | -4.09614500 | 0.46069300  |
| H  | -2.79457000 | -2.76899800 | 2.17145900  |
| H  | -2.56040800 | -0.70921100 | 0.80529100  |
| H  | -2.55297800 | -3.10178500 | -2.79133300 |

|    |             |             |             |
|----|-------------|-------------|-------------|
| H  | -2.78259600 | -5.15644200 | -1.42725500 |
| H  | -2.90224800 | -5.00408200 | 1.06279200  |
| Br | -1.43760100 | 1.85644400  | -1.22776000 |
| C  | -0.69949200 | 1.75083400  | -5.43385200 |
| O  | -0.35133500 | 1.07006000  | -6.39037900 |
| C  | 0.21237100  | 2.09348100  | -4.33103900 |
| H  | -0.07679100 | 2.92195000  | -3.68052400 |
| C  | 1.45703600  | 1.39228200  | -4.00544900 |
| O  | 1.83329600  | 0.39214200  | -4.61319600 |
| C  | -2.09775600 | 2.32091600  | -5.32193000 |
| H  | -2.73897300 | 1.88686700  | -6.10004300 |
| H  | -2.51633400 | 2.12603700  | -4.32275000 |
| H  | -2.06112400 | 3.41653800  | -5.44755000 |
| C  | 2.23643700  | 1.94952500  | -2.83293300 |
| H  | 1.59769100  | 1.94290200  | -1.93415400 |
| H  | 3.13808400  | 1.34726900  | -2.66201300 |
| H  | 2.51748700  | 2.99881500  | -3.02071500 |

UB3LYP-D3/def2-TZVPP-CPCM(THF)// UB3LYP-D3/def2-SVP-CPCM(THF)  
HF= -4947.6653381  
UM06/def2-TZVPP-CPCM(THF)// UB3LYP-D3/def2-SVP-CPCM(THF)  
HF= -4946.7828069

## <sup>2</sup>C-DMA'-conf2

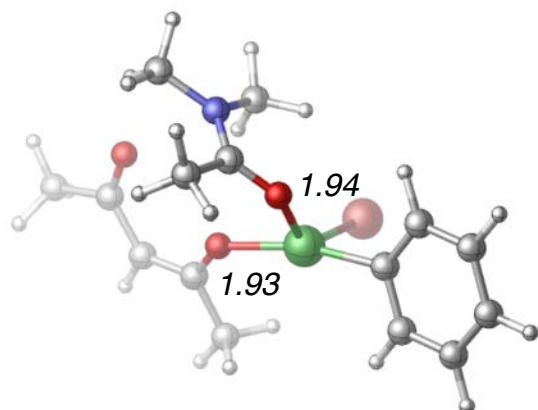

UB3LYP-D3/def2-SVP-CPCM(THF)

Zero-point correction= 0.334582 (Hartree/Particle)

Thermal correction to Energy= 0.360359

Thermal correction to Enthalpy= 0.361303

Thermal correction to Gibbs Free Energy= 0.275123

Sum of electronic and zero-point Energies= -4945.869422

Sum of electronic and thermal Energies= -4945.843645

Sum of electronic and thermal Enthalpies= -4945.842701

Sum of electronic and thermal Free Energies= -4945.928881

|    |             |             |             |
|----|-------------|-------------|-------------|
| C  | -2.01216100 | 0.86910700  | -0.04072900 |
| O  | -2.27815700 | -0.35815900 | -0.22735100 |
| N  | -1.12610100 | 1.26725300  | 0.86415700  |
| C  | -2.77296000 | 1.87403300  | -0.86856500 |
| H  | -3.23419700 | 2.66188900  | -0.25677200 |
| H  | -2.08983800 | 2.35148400  | -1.58917400 |
| H  | -3.55218800 | 1.33887400  | -1.42306500 |
| C  | -0.72519000 | 2.65795000  | 1.06780000  |
| H  | -0.90266600 | 2.94235000  | 2.11693000  |
| H  | 0.34350700  | 2.74853500  | 0.83116300  |
| H  | -1.28654200 | 3.33786700  | 0.42091000  |
| C  | -0.35376100 | 0.28037700  | 1.61671900  |
| H  | -0.02560500 | 0.73412200  | 2.56082000  |
| H  | -0.97005500 | -0.59962400 | 1.83459000  |
| H  | 0.51945900  | -0.01674600 | 1.02005000  |
| Ni | -1.14441600 | -1.85866500 | -0.70746700 |
| C  | -4.75390500 | -3.68551400 | 0.41638200  |
| C  | -3.58731600 | -2.91548200 | 0.50658100  |
| C  | -2.60890600 | -3.08051400 | -0.46876600 |
| C  | -2.72666600 | -4.01280000 | -1.49678300 |
| C  | -3.90637800 | -4.76990100 | -1.58229500 |
| C  | -4.91387700 | -4.60767500 | -0.62664800 |
| H  | -5.54179800 | -3.55949200 | 1.16398500  |
| H  | -3.45768800 | -2.18225800 | 1.30413600  |

|    |             |             |             |
|----|-------------|-------------|-------------|
| H  | -1.92404700 | -4.16192300 | -2.22475700 |
| H  | -4.02272900 | -5.49525800 | -2.39200600 |
| H  | -5.82484300 | -5.20822200 | -0.68808800 |
| Br | 0.08631200  | -3.32753100 | 0.60460900  |
| C  | 1.27103400  | -0.89155200 | -2.07248900 |
| O  | 0.19192900  | -0.64673100 | -1.40498000 |
| C  | 2.37996900  | -0.05640200 | -2.07907800 |
| H  | 3.20646300  | -0.33282200 | -2.73794600 |
| C  | 2.55225900  | 1.14703500  | -1.29164100 |
| O  | 1.74485000  | 1.58272700  | -0.46372800 |
| C  | 1.28738000  | -2.16325800 | -2.89682200 |
| H  | 0.39033100  | -2.19207500 | -3.53830900 |
| H  | 2.18589500  | -2.27002900 | -3.51926300 |
| H  | 1.21862300  | -3.02708800 | -2.21395700 |
| C  | 3.86097600  | 1.90096200  | -1.52779500 |
| H  | 3.93606300  | 2.22819800  | -2.57835100 |
| H  | 3.90766400  | 2.77801800  | -0.86770600 |
| H  | 4.72821700  | 1.24831600  | -1.33297200 |

UB3LYP-D3/def2-TZVPP-CPCM(THF)// UB3LYP-D3/def2-SVP-CPCM(THF)  
HF= -4947.6993646  
UM06/def2-TZVPP-CPCM(THF)// UB3LYP-D3/def2-SVP-CPCM(THF)  
HF= -4946.8143409



**Figure S15**  
**2B<sup>TMHD</sup>**

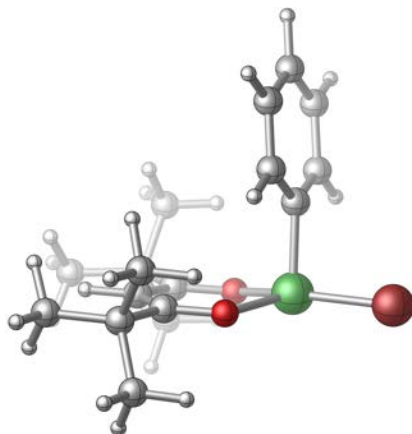

UB3LYP-D3/def2-SVP-CPCM(THF)

|                                              |             |                             |             |
|----------------------------------------------|-------------|-----------------------------|-------------|
| Zero-point correction=                       |             | 0.372835 (Hartree/Particle) |             |
| Thermal correction to Energy=                |             | 0.396936                    |             |
| Thermal correction to Enthalpy=              |             | 0.397880                    |             |
| Thermal correction to Gibbs Free Energy=     |             | 0.316227                    |             |
| Sum of electronic and zero-point Energies=   |             | -4893.938481                |             |
| Sum of electronic and thermal Energies=      |             | -4893.914380                |             |
| Sum of electronic and thermal Enthalpies=    |             | -4893.913436                |             |
| Sum of electronic and thermal Free Energies= |             | -4893.995089                |             |
| C                                            | -2.56869900 | 1.06653100                  | 1.31644600  |
| C                                            | -1.72660600 | 0.13435400                  | 0.72201700  |
| C                                            | -1.72732600 | -0.12971300                 | -0.64220700 |
| C                                            | -2.61211200 | 0.59908600                  | -1.45179000 |
| C                                            | -3.46751600 | 1.55172000                  | -0.88821000 |
| C                                            | -3.44801300 | 1.78355000                  | 0.49177300  |
| Br                                           | -1.75701700 | -2.55072000                 | 2.20848200  |
| H                                            | -1.05887500 | -0.87635900                 | -1.06983800 |
| H                                            | -2.54326000 | 1.24830600                  | 2.39274000  |
| H                                            | -4.11359100 | 2.52760500                  | 0.93735000  |
| H                                            | -4.15375800 | 2.11420600                  | -1.52591300 |
| H                                            | -2.62720700 | 0.41151600                  | -2.52880500 |
| Ni                                           | -0.42983800 | -0.68760000                 | 1.84004300  |
| O                                            | 0.93295200  | -1.16607200                 | 0.54263200  |
| O                                            | 0.39100300  | 0.96684900                  | 2.23863900  |
| C                                            | 1.28316400  | 1.56067900                  | 1.53832600  |
| C                                            | 1.79673800  | -0.37119200                 | 0.04939100  |
| C                                            | 2.65607100  | -0.99141700                 | -1.06922800 |
| C                                            | 1.52176100  | 3.02424000                  | 1.95026700  |
| C                                            | 1.97810800  | 0.96352900                  | 0.47281000  |
| H                                            | 2.71755000  | 1.56234200                  | -0.04319500 |
| C                                            | 1.69380800  | -1.49935100                 | -2.16566200 |

|   |             |             |             |
|---|-------------|-------------|-------------|
| H | 0.98004100  | -2.22654400 | -1.75315500 |
| H | 1.12391500  | -0.66664400 | -2.60842600 |
| H | 2.26532700  | -1.98824600 | -2.97009600 |
| C | 3.66344500  | -0.01191800 | -1.68855700 |
| H | 4.38344600  | 0.36223100  | -0.94467900 |
| H | 4.23705700  | -0.52670700 | -2.47498400 |
| H | 3.16265400  | 0.85147200  | -2.15325400 |
| C | 3.41496200  | -2.18645700 | -0.45034800 |
| H | 3.99998400  | -2.70370900 | -1.22715900 |
| H | 4.11160300  | -1.84858400 | 0.33394300  |
| H | 2.71297700  | -2.90450200 | -0.00295700 |
| C | 2.69077000  | 3.68788200  | 1.20795500  |
| H | 2.81275200  | 4.72079600  | 1.56925000  |
| H | 3.63951800  | 3.15753900  | 1.38389700  |
| H | 2.51530400  | 3.73733500  | 0.12249100  |
| C | 1.79255100  | 3.06090600  | 3.46923300  |
| H | 1.90301400  | 4.10371300  | 3.80558200  |
| H | 0.96580200  | 2.59911200  | 4.02657100  |
| H | 2.72094900  | 2.52151300  | 3.71750400  |
| C | 0.21249400  | 3.78414400  | 1.63441400  |
| H | -0.00553100 | 3.76202100  | 0.55459400  |
| H | -0.63914600 | 3.33245900  | 2.16268100  |
| H | 0.30437000  | 4.83669000  | 1.94595400  |

UB3LYP-D3/def2-TZVPP-CPCM(THF)//UB3LYP-D3/def2-SVP-CPCM(THF)  
HF= -4895.7394255

2C<sup>TMHD</sup>

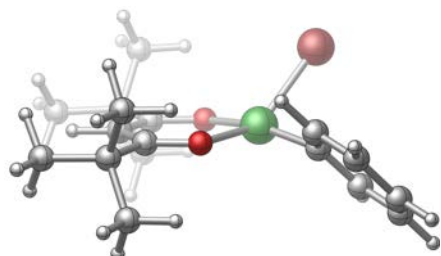

UB3LYP-D3/def2-SVP-CPCM(THF)

Zero-point correction= 0.372626 (Hartree/Particle)

Thermal correction to Energy= 0.396808

Thermal correction to Enthalpy= 0.397752

Thermal correction to Gibbs Free Energy= 0.315737

Sum of electronic and zero-point Energies= -4893.929733

Sum of electronic and thermal Energies= -4893.905551

Sum of electronic and thermal Enthalpies= -4893.904607

Sum of electronic and thermal Free Energies= -4893.986622

|    |             |             |             |
|----|-------------|-------------|-------------|
| C  | -3.03615900 | -1.47922900 | -1.00536000 |
| O  | -3.58360700 | -0.31983100 | -1.08381500 |
| C  | -3.72718600 | -2.69444500 | -0.92015000 |
| H  | -3.14584600 | -3.60673300 | -0.88326300 |
| C  | -5.13538500 | -2.79891800 | -0.83990500 |
| O  | -5.91740500 | -1.79941500 | -0.86169000 |
| C  | -5.84418000 | -4.16080100 | -0.71787200 |
| C  | -1.49617300 | -1.41323600 | -1.00946800 |
| Ni | -5.43455200 | 0.05667100  | -1.16028600 |
| C  | -5.07611800 | 1.92976300  | -1.04472300 |
| C  | -4.02526300 | 2.51299000  | -1.74720500 |
| C  | -5.81228300 | 2.63386400  | -0.09387100 |
| C  | -3.67941300 | 3.84006300  | -1.46191200 |
| H  | -3.47149700 | 1.93696700  | -2.49080200 |
| C  | -5.44910000 | 3.95961700  | 0.19256000  |
| H  | -6.66031600 | 2.17381100  | 0.42047400  |
| C  | -4.38776800 | 4.56061800  | -0.49129000 |
| H  | -2.85118600 | 4.30956500  | -1.99978500 |
| H  | -6.00953300 | 4.52070500  | 0.94532200  |
| H  | -4.11536900 | 5.59643300  | -0.27374000 |
| Br | -7.01082900 | 0.53755800  | -2.78894400 |
| C  | -0.82487900 | -2.79026300 | -0.90392000 |
| H  | 0.26880700  | -2.66309600 | -0.90844200 |
| H  | -1.09603800 | -3.30833600 | 0.02879000  |
| H  | -1.08623300 | -3.44054200 | -1.75290200 |
| C  | -1.06736500 | -0.53931500 | 0.19008600  |
| H  | -1.52928500 | 0.45628300  | 0.13242800  |
| H  | -1.36436100 | -1.00500600 | 1.14367200  |

|   |             |             |             |
|---|-------------|-------------|-------------|
| H | 0.02751600  | -0.42002100 | 0.19436000  |
| C | -1.06446000 | -0.73322900 | -2.32785900 |
| H | -1.37069900 | -1.33269600 | -3.20032400 |
| H | -1.51391800 | 0.26561900  | -2.41892200 |
| H | 0.03150500  | -0.62708200 | -2.35371200 |
| C | -4.88062500 | -5.35397100 | -0.64152600 |
| H | -4.25497900 | -5.43533600 | -1.54363900 |
| H | -4.21904700 | -5.29123900 | 0.23639500  |
| H | -5.45993100 | -6.28646500 | -0.55518600 |
| C | -6.74880700 | -4.30624300 | -1.96245300 |
| H | -7.43935700 | -3.45456000 | -2.04257700 |
| H | -6.14709900 | -4.34976800 | -2.88470800 |
| H | -7.33724200 | -5.23482400 | -1.89380000 |
| C | -6.71490500 | -4.12101300 | 0.55675900  |
| H | -7.28836300 | -5.05672800 | 0.64971000  |
| H | -6.09018400 | -4.01201200 | 1.45819700  |
| H | -7.42044400 | -3.27901100 | 0.52120300  |

UB3LYP-D3/def2-TZVPP-CPCM(THF)//UB3LYP-D3/def2-SVP-CPCM(THF)  
HF= -4895.73076529

### <sup>3</sup>C-complex<sup>TMHD</sup>

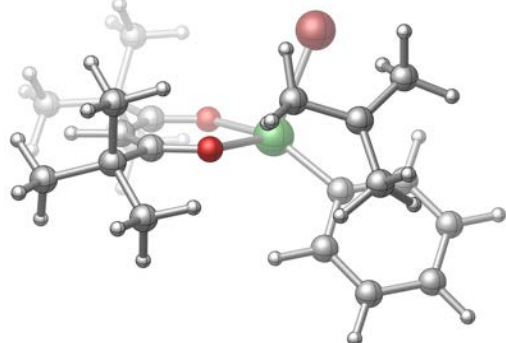

UB3LYP-D3/def2-SVP-CPCM(THF)

Zero-point correction= 0.489906 (Hartree/Particle)

Thermal correction to Energy= 0.521374

Thermal correction to Enthalpy= 0.522318

Thermal correction to Gibbs Free Energy= 0.425218

Sum of electronic and zero-point Energies= -5051.534392

Sum of electronic and thermal Energies= -5051.502925

Sum of electronic and thermal Enthalpies= -5051.501980

Sum of electronic and thermal Free Energies= -5051.599081

|    |             |             |             |
|----|-------------|-------------|-------------|
| C  | -4.19805300 | -1.47087900 | 2.19745700  |
| O  | -4.50713200 | -0.26041500 | 2.40633100  |
| C  | -3.64201300 | -1.95701600 | 0.98997300  |
| H  | -3.38548300 | -3.00792600 | 0.94331000  |
| C  | -3.40732200 | -1.18306300 | -0.16154400 |
| O  | -3.67565300 | 0.06084000  | -0.26625000 |
| C  | -2.82101300 | -1.83063900 | -1.43715800 |
| C  | -4.49347400 | -2.42012600 | 3.38050200  |
| Ni | -4.38692600 | 1.27767400  | 1.14689900  |
| C  | -3.53261500 | 2.98911100  | 0.63333600  |
| C  | -4.09190300 | 4.26960500  | 0.82963200  |
| C  | -2.20030100 | 2.95478800  | 0.16314500  |
| C  | -3.37483200 | 5.44670800  | 0.57720100  |
| H  | -5.12660000 | 4.34462800  | 1.18194500  |
| C  | -1.46416700 | 4.11968700  | -0.08781100 |
| H  | -1.72921700 | 1.98262600  | -0.02135600 |
| C  | -2.05271000 | 5.37490200  | 0.11651100  |
| H  | -3.84425200 | 6.42272600  | 0.73669100  |
| H  | -0.43408700 | 4.05370600  | -0.45251500 |
| H  | -1.48788900 | 6.28958100  | -0.08493700 |
| Br | -6.83112500 | 1.61530300  | 0.78921500  |
| C  | -4.86396000 | 3.06426000  | -2.38815600 |
| C  | -3.64646000 | 3.80785300  | -2.72703000 |
| H  | -2.77298600 | 3.16917100  | -2.90126600 |
| H  | -3.89618800 | 4.33714800  | -3.67169600 |

|   |             |             |             |
|---|-------------|-------------|-------------|
| H | -3.43193200 | 4.59688000  | -1.98973500 |
| C | -6.02730300 | 3.75295600  | -1.85560300 |
| H | -6.27492900 | 3.23522900  | -0.88809900 |
| H | -5.88983200 | 4.82841100  | -1.70092200 |
| H | -6.91126200 | 3.52976500  | -2.47876300 |
| C | -4.92032100 | 1.62609300  | -2.60312500 |
| H | -4.39980600 | 1.18120800  | -1.71248700 |
| H | -5.93601900 | 1.21352600  | -2.61584200 |
| H | -4.31876400 | 1.30951200  | -3.46806300 |
| C | -3.99765900 | -2.04299800 | -2.41666900 |
| H | -4.50980500 | -1.09613700 | -2.63543100 |
| H | -3.62975600 | -2.46321500 | -3.36682800 |
| H | -4.73811400 | -2.74187400 | -1.99634900 |
| C | -1.79247300 | -0.86164300 | -2.05512900 |
| H | -0.94894400 | -0.69247700 | -1.36629000 |
| H | -1.39075900 | -1.28343000 | -2.98995400 |
| H | -2.24412200 | 0.11364500  | -2.27809000 |
| C | -2.13552100 | -3.18274700 | -1.17725000 |
| H | -1.33979400 | -3.09453500 | -0.42124800 |
| H | -2.84676500 | -3.95210300 | -0.84154600 |
| H | -1.67782500 | -3.54796000 | -2.11010200 |
| C | -4.03481600 | -3.86790200 | 3.15263100  |
| H | -4.54509200 | -4.33078300 | 2.29399500  |
| H | -2.94829100 | -3.93038100 | 2.98467900  |
| H | -4.26982000 | -4.47309900 | 4.04257900  |
| C | -3.78742500 | -1.85256500 | 4.62981700  |
| H | -4.10196500 | -0.81629000 | 4.81677700  |
| H | -4.03378000 | -2.46071900 | 5.51490000  |
| H | -2.69233900 | -1.86283400 | 4.50307800  |
| C | -6.02375400 | -2.39487900 | 3.59346500  |
| H | -6.29684300 | -3.00026000 | 4.47277700  |
| H | -6.37558700 | -1.36501800 | 3.74989800  |
| H | -6.55016300 | -2.80707100 | 2.71709800  |

UB3LYP-D3/def2-TZVPP-CPCM(THF)//UB3LYP-D3/def2-SVP-CPCM(THF)  
HF= -5053.62941616

### 3C-TS<sup>TMHD</sup>

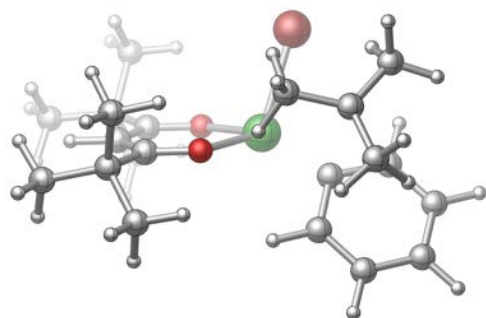

UB3LYP-D3/def2-SVP-CPCM(THF)

Zero-point correction= 0.490206 (Hartree/Particle)  
Thermal correction to Energy= 0.521083  
Thermal correction to Enthalpy= 0.522027  
Thermal correction to Gibbs Free Energy= 0.426260  
Sum of electronic and zero-point Energies= -5051.532776  
Sum of electronic and thermal Energies= -5051.501899  
Sum of electronic and thermal Enthalpies= -5051.500955  
Sum of electronic and thermal Free Energies= -5051.596722

|    |             |             |             |
|----|-------------|-------------|-------------|
| C  | -4.14753400 | -1.48132700 | 2.30746700  |
| O  | -4.44355000 | -0.25668700 | 2.44671400  |
| C  | -3.54744000 | -2.03086700 | 1.15083200  |
| H  | -3.31137500 | -3.08747600 | 1.15977900  |
| C  | -3.22455700 | -1.29905500 | -0.00872700 |
| O  | -3.47446100 | -0.06153200 | -0.17935400 |
| C  | -2.54038500 | -1.98320100 | -1.21504200 |
| C  | -4.51150100 | -2.36708500 | 3.51972900  |
| Ni | -4.34960200 | 1.19437100  | 1.09370400  |
| C  | -3.58220100 | 2.93087200  | 0.48779900  |
| C  | -4.14597100 | 4.19912300  | 0.75030900  |
| C  | -2.24245000 | 2.92270400  | 0.02939800  |
| C  | -3.42897200 | 5.38828400  | 0.57152100  |
| H  | -5.18348000 | 4.25104300  | 1.09742400  |
| C  | -1.50639600 | 4.09787000  | -0.14584200 |
| H  | -1.77131500 | 1.96058700  | -0.20018500 |
| C  | -2.10333200 | 5.34043800  | 0.11802800  |
| H  | -3.90014900 | 6.35387200  | 0.77915200  |
| H  | -0.47168900 | 4.05531300  | -0.49971000 |
| H  | -1.53881400 | 6.26508900  | -0.03090500 |
| Br | -6.81827500 | 1.41346700  | 0.81869300  |
| C  | -4.80157500 | 3.10131700  | -2.19963000 |
| C  | -3.66950100 | 3.87909300  | -2.71678800 |
| H  | -2.79502500 | 3.26976500  | -2.96958300 |
| H  | -4.04306200 | 4.39922900  | -3.62213900 |
| H  | -3.39483700 | 4.68633700  | -2.01619500 |

|   |             |             |             |
|---|-------------|-------------|-------------|
| C | -6.03327600 | 3.78608800  | -1.79967500 |
| H | -6.44540600 | 3.30572100  | -0.89038200 |
| H | -5.92497300 | 4.87084800  | -1.68731900 |
| H | -6.77949600 | 3.55714800  | -2.58873600 |
| C | -4.81055300 | 1.64007500  | -2.33682300 |
| H | -3.89070000 | 1.19522500  | -1.92766300 |
| H | -5.68174500 | 1.16981800  | -1.86640100 |
| H | -4.80286000 | 1.43280500  | -3.42681200 |
| C | -1.36682000 | -1.09243100 | -1.67365800 |
| H | -0.60786900 | -1.00101100 | -0.87959800 |
| H | -0.88241900 | -1.53201300 | -2.56002000 |
| H | -1.71247300 | -0.08167900 | -1.93039000 |
| C | -3.59341200 | -2.07608500 | -2.34200800 |
| H | -4.44565900 | -2.70332800 | -2.03499400 |
| H | -3.97871700 | -1.08155200 | -2.60630200 |
| H | -3.14588500 | -2.52411300 | -3.24397500 |
| C | -2.00793200 | -3.39155900 | -0.90638300 |
| H | -2.81605800 | -4.09348400 | -0.65093200 |
| H | -1.49371400 | -3.79320600 | -1.79391100 |
| H | -1.28532900 | -3.37895800 | -0.07559900 |
| C | -6.04880200 | -2.30525100 | 3.66341200  |
| H | -6.37116500 | -2.86187300 | 4.55816400  |
| H | -6.38771800 | -1.26317100 | 3.75271400  |
| H | -6.54428300 | -2.75089000 | 2.78539500  |
| C | -4.07225900 | -3.83210800 | 3.38081800  |
| H | -4.55138400 | -4.32532800 | 2.52106400  |
| H | -2.98057600 | -3.92334400 | 3.26785400  |
| H | -4.36123100 | -4.39066500 | 4.28530800  |
| C | -3.84905200 | -1.75312600 | 4.77088600  |
| H | -4.14529300 | -2.31349400 | 5.67213300  |
| H | -2.74995400 | -1.78908800 | 4.69275900  |
| H | -4.15064900 | -0.70358900 | 4.89435000  |

UB3LYP-D3/def2-TZVPP-CPCM(THF)//UB3LYP-D3/def2-SVP-CPCM(THF)  
HF= -5053.62798843



$3P_A^{TMHD}$

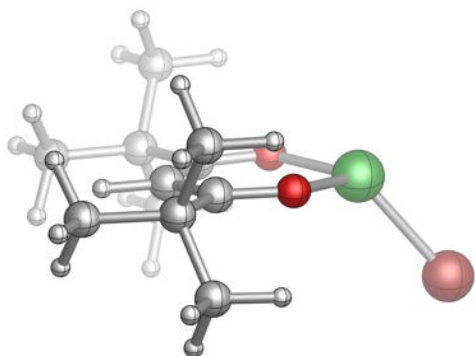

UB3LYP-D3/def2-SVP-CPCM(THF)

Zero-point correction= 0.282662 (Hartree/Particle)

Thermal correction to Energy= 0.301298

Thermal correction to Enthalpy= 0.302242

Thermal correction to Gibbs Free Energy= 0.233217

Sum of electronic and zero-point Energies= -4662.566267

Sum of electronic and thermal Energies= -4662.547631

Sum of electronic and thermal Enthalpies= -4662.546686

Sum of electronic and thermal Free Energies= -4662.615712

|    |             |             |             |
|----|-------------|-------------|-------------|
| C  | -4.16700400 | -0.40222700 | 2.65529700  |
| O  | -5.13971600 | 0.35433000  | 2.31766400  |
| C  | -3.23345300 | -0.95046200 | 1.75314300  |
| H  | -2.45486600 | -1.58098000 | 2.16264600  |
| C  | -3.21113900 | -0.71121000 | 0.36412700  |
| O  | -4.06759300 | 0.00109200  | -0.26275100 |
| C  | -2.11244400 | -1.30436300 | -0.53872000 |
| C  | -4.08893700 | -0.67638000 | 4.16906700  |
| Ni | -5.62926000 | 0.77793600  | 0.52055600  |
| Br | -7.73773800 | 0.11643200  | -0.24995500 |
| C  | -2.90452500 | -1.56399200 | 4.57828100  |
| H  | -1.93833400 | -1.10485800 | 4.31781100  |
| H  | -2.91897000 | -1.71112000 | 5.66947900  |
| H  | -2.95499600 | -2.55864500 | 4.10923100  |
| C  | -3.97676100 | 0.68838700  | 4.88340500  |
| H  | -4.81907900 | 1.34057700  | 4.61305300  |
| H  | -3.98111300 | 0.54324000  | 5.97520400  |
| H  | -3.03991500 | 1.20067100  | 4.61027400  |
| C  | -5.41118300 | -1.36744300 | 4.57247800  |
| H  | -6.27548000 | -0.74839600 | 4.29302600  |
| H  | -5.51205200 | -2.34592400 | 4.07557900  |
| H  | -5.43309500 | -1.53298600 | 5.66122100  |
| C  | -1.08285500 | -2.15697000 | 0.21714600  |
| H  | -0.54178200 | -1.57110500 | 0.97611600  |
| H  | -1.55059600 | -3.02123300 | 0.71340400  |

|   |             |             |             |
|---|-------------|-------------|-------------|
| H | -0.33824900 | -2.54663100 | -0.49437100 |
| C | -1.39251800 | -0.12376400 | -1.22725300 |
| H | -0.63530700 | -0.50315200 | -1.93149900 |
| H | -2.10740000 | 0.49898900  | -1.78337600 |
| H | -0.88157600 | 0.51258700  | -0.48657700 |
| C | -2.81648900 | -2.17637200 | -1.60240600 |
| H | -3.33119000 | -3.03092200 | -1.13404800 |
| H | -3.56097400 | -1.58898700 | -2.15814200 |
| H | -2.07612800 | -2.57259800 | -2.31519100 |

UB3LYP-D3/def2-TZVPP-CPCM(THF)// UB3LYP-D3/def2-SVP-CPCM(THF)  
HF= -4664.03136026

**Figure S17**  
**[Ir(II)]**

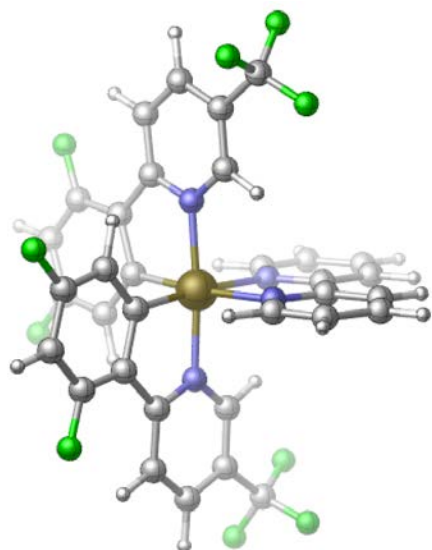

UB3LYP-D3/def2-SVP-CPCM(THF)

|                                              |                             |             |             |
|----------------------------------------------|-----------------------------|-------------|-------------|
| Zero-point correction=                       | 0.456088 (Hartree/Particle) |             |             |
| Thermal correction to Energy=                | 0.496055                    |             |             |
| Thermal correction to Enthalpy=              | 0.496999                    |             |             |
| Thermal correction to Gibbs Free Energy=     | 0.378449                    |             |             |
| Sum of electronic and zero-point Energies=   | -2626.184144                |             |             |
| Sum of electronic and thermal Energies=      | -2626.144177                |             |             |
| Sum of electronic and thermal Enthalpies=    | -2626.143232                |             |             |
| Sum of electronic and thermal Free Energies= | -2626.261783                |             |             |
| Ir                                           | -0.38361500                 | 0.77402400  | 0.05316900  |
| C                                            | 2.34735200                  | 1.55708000  | 1.07420000  |
| C                                            | 2.41755700                  | 1.29983400  | -1.28265800 |
| C                                            | 3.73792100                  | 1.88540800  | 1.05493200  |
| C                                            | 1.54618300                  | 1.50257900  | 2.25738700  |
| C                                            | 3.76397300                  | 1.61776800  | -1.34905400 |
| H                                            | 1.85216300                  | 1.05616000  | -2.18579600 |
| C                                            | 4.43596300                  | 1.91595000  | -0.13134000 |
| H                                            | 4.24922400                  | 2.11309300  | 1.99056100  |
| C                                            | 2.02866400                  | 1.78209300  | 3.57294900  |
| H                                            | 4.27848300                  | 1.63319400  | -2.31040600 |
| H                                            | 5.49928800                  | 2.16794500  | -0.13425200 |
| C                                            | -0.59876000                 | 1.08108500  | 3.17806200  |
| C                                            | 1.18832500                  | 1.70340600  | 4.66064600  |
| H                                            | 3.07308700                  | 2.06117100  | 3.71419800  |
| C                                            | -0.17324600                 | 1.33815200  | 4.47076900  |
| H                                            | -1.63515300                 | 0.80142300  | 2.97206200  |
| H                                            | 1.56779800                  | 1.92063400  | 5.66211800  |
| H                                            | -0.87109400                 | 1.26044100  | 5.30511000  |
| C                                            | -1.20298700                 | -1.96383800 | 0.73819500  |

|   |             |             |             |
|---|-------------|-------------|-------------|
| C | 1.11681300  | -1.82859300 | 0.34511200  |
| C | -1.07689600 | -3.34293800 | 0.99669600  |
| C | -2.43196900 | -1.17336500 | 0.77340100  |
| C | 1.28877300  | -3.18376500 | 0.59613000  |
| H | 1.95705500  | -1.18870400 | 0.07846900  |
| C | 0.16627400  | -3.95482400 | 0.92500200  |
| H | -1.95872600 | -3.92382500 | 1.24996100  |
| C | -2.28624200 | 0.21283100  | 0.45110000  |
| C | -3.71127200 | -1.66010700 | 1.10138600  |
| H | 0.26512200  | -5.02467200 | 1.11845200  |
| C | -3.42294200 | 1.03566800  | 0.46870100  |
| C | -4.83725100 | -0.84913300 | 1.12405700  |
| C | -4.66164900 | 0.49780900  | 0.80247100  |
| H | -3.36520800 | 2.09860200  | 0.22890800  |
| H | -5.81457800 | -1.25438600 | 1.38393400  |
| C | -0.76136600 | 0.59493300  | -1.92704200 |
| C | -1.08185900 | 1.82964800  | -2.57472800 |
| C | -0.70798800 | -0.57879600 | -2.69448400 |
| C | -1.32492000 | 1.82253700  | -3.96108600 |
| C | -1.12033100 | 3.00700200  | -1.70896600 |
| C | -0.95672700 | -0.52336500 | -4.06206400 |
| H | -0.47155300 | -1.54613700 | -2.24825800 |
| C | -1.26781200 | 0.66511300  | -4.72473000 |
| C | -1.42632300 | 4.32796300  | -2.09075400 |
| H | -1.45934100 | 0.69105800  | -5.79690900 |
| C | -0.81789200 | 3.72327200  | 0.51586400  |
| C | -1.42840100 | 5.34401800  | -1.14574900 |
| H | -1.66027100 | 4.54557000  | -3.12862000 |
| C | -1.11862300 | 5.03850900  | 0.18583900  |
| H | -1.66255400 | 6.36897900  | -1.43944600 |
| N | 1.71837900  | 1.25851900  | -0.13231300 |
| N | 0.20508800  | 1.16057400  | 2.10042000  |
| N | -0.08694600 | -1.23930600 | 0.40954300  |
| N | -0.82238600 | 2.74098200  | -0.39775800 |
| C | 2.66020500  | -3.80107100 | 0.55323200  |
| F | 3.14500300  | -4.01512800 | 1.79241600  |
| F | 3.54522900  | -3.02117500 | -0.09014500 |
| F | 2.63996800  | -4.99550400 | -0.06605700 |
| F | -3.88932800 | -2.95793500 | 1.41527800  |
| F | -5.73932900 | 1.29702900  | 0.81882300  |
| F | -1.62428200 | 2.96511100  | -4.60875900 |
| F | -0.89844900 | -1.65281300 | -4.78414100 |
| H | -0.56136900 | 3.43599300  | 1.53475600  |
| C | -1.15339100 | 6.10205200  | 1.24945300  |
| F | -0.61759400 | 7.25480300  | 0.80869300  |
| F | -0.48167500 | 5.73342700  | 2.35350300  |

F            -2.41670600  6.38074700  1.62781400  
UB3LYP-D3/def2-TZVPP-CPCM(THF)// UB3LYP-D3/def2-SVP-CPCM(THF)  
HF= -2629.5151152  
UM06/def2-TZVPP-CPCM(THF)// UB3LYP-D3/def2-SVP-CPCM(THF)  
HF= -2627.9322792

[Ir(III)]<sup>+</sup>

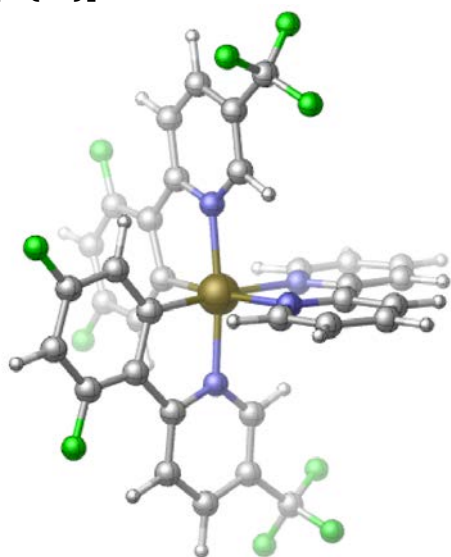

UB3LYP-D3/def2-SVP-CPCM(THF)

Zero-point correction= 0.459873 (Hartree/Particle)

Thermal correction to Energy= 0.499499

Thermal correction to Enthalpy= 0.500443

Thermal correction to Gibbs Free Energy= 0.383450

Sum of electronic and zero-point Energies= -2626.063035

Sum of electronic and thermal Energies= -2626.023409

Sum of electronic and thermal Enthalpies= -2626.022465

Sum of electronic and thermal Free Energies= -2626.139458

|    |             |             |             |
|----|-------------|-------------|-------------|
| Ir | -0.36720300 | 0.77952700  | 0.06402700  |
| C  | 2.38652400  | 1.58502300  | 1.06698800  |
| C  | 2.42805500  | 1.35755700  | -1.25950400 |
| C  | 3.73997300  | 1.94563400  | 1.07249400  |
| C  | 1.56470700  | 1.49006000  | 2.29981200  |
| C  | 3.77401700  | 1.71107200  | -1.32161800 |
| H  | 1.86155100  | 1.11139000  | -2.15945200 |
| C  | 4.43993800  | 2.00930000  | -0.13187700 |
| H  | 4.24890400  | 2.17751000  | 2.00668500  |
| C  | 2.07363700  | 1.73195000  | 3.58207600  |
| H  | 4.28084200  | 1.74808300  | -2.28671300 |
| H  | 5.49488900  | 2.28997700  | -0.13730600 |
| C  | -0.54779900 | 1.03770800  | 3.19369300  |
| C  | 1.23267100  | 1.61942200  | 4.68865100  |
| H  | 3.11804600  | 2.00575800  | 3.72187300  |
| C  | -0.10296800 | 1.26420200  | 4.49413000  |
| H  | -1.58236600 | 0.75935700  | 2.98495900  |
| H  | 1.62051500  | 1.80683600  | 5.69171500  |
| H  | -0.79616300 | 1.16232700  | 5.33004100  |
| C  | -1.21972100 | -1.95400300 | 0.73314100  |

|   |             |             |             |
|---|-------------|-------------|-------------|
| C | 1.10163800  | -1.85646100 | 0.34063800  |
| C | -1.11821500 | -3.33733900 | 0.97548300  |
| C | -2.43541000 | -1.14432500 | 0.77199500  |
| C | 1.25013700  | -3.21667800 | 0.57522400  |
| H | 1.95744300  | -1.23755900 | 0.07567900  |
| C | 0.11416200  | -3.97017800 | 0.89631400  |
| H | -2.01018300 | -3.90644400 | 1.21964200  |
| C | -2.27236700 | 0.23887500  | 0.45318600  |
| C | -3.72190900 | -1.61132400 | 1.10260600  |
| H | 0.19325500  | -5.04396300 | 1.07620300  |
| C | -3.39069500 | 1.08218300  | 0.47576200  |
| C | -4.83382600 | -0.78149000 | 1.12989900  |
| C | -4.63836000 | 0.56239400  | 0.81197100  |
| H | -3.32047300 | 2.14392000  | 0.23766600  |
| H | -5.81688700 | -1.17171500 | 1.39127000  |
| C | -0.74495800 | 0.58128800  | -1.90904100 |
| C | -1.07074200 | 1.80607900  | -2.56857000 |
| C | -0.67417000 | -0.60085500 | -2.65716800 |
| C | -1.30553300 | 1.78075600  | -3.95663300 |
| C | -1.12303600 | 2.99278100  | -1.71722400 |
| C | -0.91559400 | -0.56296500 | -4.02840200 |
| H | -0.43349300 | -1.56155800 | -2.20088300 |
| C | -1.23351300 | 0.61441100  | -4.70518000 |
| C | -1.45072100 | 4.30320700  | -2.11465900 |
| H | -1.41910400 | 0.62615600  | -5.77867700 |
| C | -0.83773400 | 3.74010900  | 0.49917100  |
| C | -1.47314600 | 5.32942900  | -1.18093400 |
| H | -1.68875200 | 4.50473300  | -3.15477800 |
| C | -1.16335400 | 5.04493300  | 0.15494100  |
| H | -1.72632500 | 6.34619300  | -1.48708800 |
| N | 1.75547400  | 1.29387500  | -0.09938000 |
| N | 0.26119100  | 1.15194300  | 2.12847300  |
| N | -0.09061500 | -1.24482100 | 0.41597400  |
| N | -0.81828700 | 2.74747400  | -0.40373300 |
| C | 2.61267600  | -3.85661200 | 0.52181200  |
| F | 3.10234800  | -4.07120500 | 1.75753400  |
| F | 3.50139300  | -3.08854900 | -0.13119600 |
| F | 2.56742400  | -5.04948500 | -0.09414100 |
| F | -3.91702700 | -2.90403800 | 1.41404900  |
| F | -5.69845700 | 1.37943900  | 0.83251100  |
| F | -1.60903600 | 2.91184300  | -4.61605200 |
| F | -0.84204900 | -1.69891000 | -4.73266500 |
| H | -0.58538500 | 3.47760800  | 1.52538800  |
| C | -1.22539400 | 6.11997400  | 1.20806100  |
| F | -0.68430200 | 7.26779300  | 0.76615200  |
| F | -0.57444400 | 5.76211400  | 2.32835200  |

F            -2.49680900  6.39308100  1.55489100  
UB3LYP-D3/def2-TZVPP-CPCM(THF)// UB3LYP-D3/def2-SVP-CPCM(THF)  
HF= -2629.3946502  
UM06/def2-TZVPP-CPCM(THF)// UB3LYP-D3/def2-SVP-CPCM(THF)  
HF= -2627.8122578



## K<sup>+</sup>

UB3LYP-D3/def2-SVP-CPCM(THF)

Zero-point correction= 0.000000 (Hartree/Particle)

Thermal correction to Energy= 0.001416

Thermal correction to Enthalpy= 0.002360

Thermal correction to Gibbs Free Energy= -0.015176

Sum of electronic and zero-point Energies= -599.792231

Sum of electronic and thermal Energies= -599.790815

Sum of electronic and thermal Enthalpies= -599.789871

Sum of electronic and thermal Free Energies= -599.807407

K 0.67977500 1.81953700 -2.01383600

UB3LYP-D3/def2-TZVPP-CPCM(THF)// UB3LYP-D3/def2-SVP-CPCM(THF)

HF= -599.8697705

UM06/def2-TZVPP-CPCM(THF)// UB3LYP-D3/def2-SVP-CPCM(THF)

HF= -599.8424387

## KBr

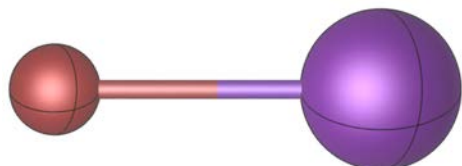

UB3LYP-D3/def2-SVP-CPCM(THF)

Zero-point correction= 0.000291 (Hartree/Particle)

Thermal correction to Energy= 0.003334

Thermal correction to Enthalpy= 0.004279

Thermal correction to Gibbs Free Energy= -0.024774

Sum of electronic and zero-point Energies= -3173.856696

Sum of electronic and thermal Energies= -3173.853653

Sum of electronic and thermal Enthalpies= -3173.852709

Sum of electronic and thermal Free Energies= -3173.881762

K -0.27573900 1.80647700 -1.00469500

Br -3.38333800 1.80647700 -1.00469500

UB3LYP-D3/def2-TZVPP-CPCM(THF)// UB3LYP-D3/def2-SVP-CPCM(THF)

HF= -3174.256792

UM06/def2-TZVPP-CPCM(THF)// UB3LYP-D3/def2-SVP-CPCM(THF)

HF= -3174.1001508

# <sup>1</sup>P<sub>A</sub>-TMHD

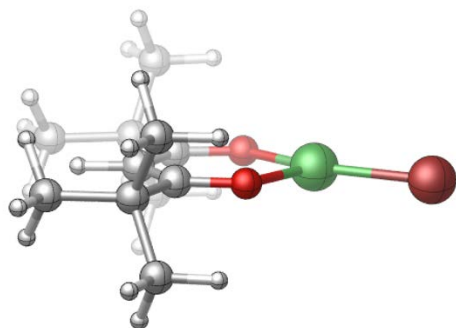

UB3LYP-D3/def2-SVP-CPCM(THF)

Zero-point correction= 0.282899 (Hartree/Particle)

Thermal correction to Energy= 0.301442

Thermal correction to Enthalpy= 0.302386

Thermal correction to Gibbs Free Energy= 0.234658

Sum of electronic and zero-point Energies= -4662.552097

Sum of electronic and thermal Energies= -4662.533554

Sum of electronic and thermal Enthalpies= -4662.532610

Sum of electronic and thermal Free Energies= -4662.600337

|    |             |             |             |
|----|-------------|-------------|-------------|
| C  | -2.67689100 | 1.50064700  | -0.05133500 |
| O  | -1.42106200 | 1.53065300  | -0.28586800 |
| C  | -3.43835400 | 0.32407000  | 0.07753400  |
| H  | -4.49775900 | 0.42432000  | 0.27535300  |
| C  | -2.90671800 | -0.97398200 | -0.03591800 |
| O  | -1.67346600 | -1.22093200 | -0.26675900 |
| C  | -3.30475800 | 2.90087100  | 0.08111300  |
| C  | -3.78209700 | -2.23131300 | 0.10708500  |
| Ni | -0.31332000 | 0.03984100  | -0.51201000 |
| Br | 1.82020300  | 0.91198800  | -0.90887100 |
| C  | -3.67744000 | -3.01696800 | -1.21927400 |
| H  | -2.63039000 | -3.26130100 | -1.44801600 |
| H  | -4.24888200 | -3.95565800 | -1.14550000 |
| H  | -4.08809500 | -2.43169500 | -2.05782800 |
| C  | -5.25691000 | -1.91964900 | 0.40030800  |
| H  | -5.81737900 | -2.86280300 | 0.49247700  |
| H  | -5.37928900 | -1.36675700 | 1.34431100  |
| H  | -5.72151600 | -1.33529900 | -0.40862600 |
| C  | -3.19667000 | -3.07570700 | 1.26065900  |
| H  | -3.25819300 | -2.53293700 | 2.21771400  |
| H  | -3.76359900 | -4.01435100 | 1.36297400  |
| H  | -2.14248000 | -3.32164900 | 1.07013400  |
| C  | -3.04457300 | 3.64761900  | -1.24638900 |
| H  | -3.42761500 | 4.67791500  | -1.17842900 |
| H  | -1.96868200 | 3.68623800  | -1.46782300 |
| H  | -3.55352200 | 3.14797900  | -2.08647800 |

|   |             |            |             |
|---|-------------|------------|-------------|
| C | -4.81319500 | 2.87253300 | 0.36555800  |
| H | -5.37475200 | 2.38061600 | -0.44351400 |
| H | -5.04277600 | 2.35931100 | 1.31202700  |
| H | -5.18707500 | 3.90483500 | 0.44886800  |
| C | -2.57677900 | 3.62410700 | 1.23623200  |
| H | -2.95320300 | 4.65492400 | 1.32904500  |
| H | -2.74929600 | 3.10915900 | 2.19514100  |
| H | -1.49362900 | 3.66017400 | 1.05302600  |

UB3LYP-D3/def2-TZVPP-CPCM(THF)// UB3LYP-D3/def2-SVP-CPCM(THF)

HF= -4664.0202018

UM06/def2-TZVPP-CPCM(THF)// UB3LYP-D3/def2-SVP-CPCM(THF)

HF= -4663.333533

### <sup>3</sup>P<sub>A</sub>-TMHD

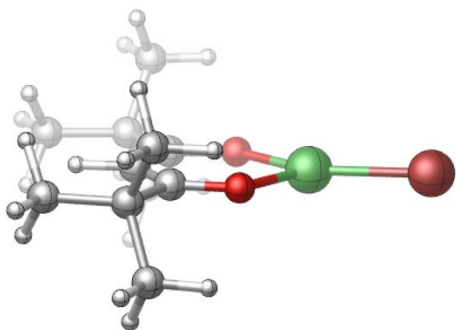

UB3LYP-D3/def2-SVP-CPCM(THF)

Zero-point correction= 0.282628 (Hartree/Particle)

Thermal correction to Energy= 0.301243

Thermal correction to Enthalpy= 0.302187

Thermal correction to Gibbs Free Energy= 0.233454

Sum of electronic and zero-point Energies= -4662.565357

Sum of electronic and thermal Energies= -4662.546741

Sum of electronic and thermal Enthalpies= -4662.545797

Sum of electronic and thermal Free Energies= -4662.614530

|    |             |             |             |
|----|-------------|-------------|-------------|
| C  | -2.71245200 | 1.52103100  | -0.04857400 |
| O  | -1.45837800 | 1.56881700  | -0.27941600 |
| C  | -3.45883500 | 0.33159800  | 0.07913400  |
| H  | -4.52137600 | 0.42417300  | 0.26347600  |
| C  | -2.92327900 | -0.96773600 | -0.01162300 |
| O  | -1.68892300 | -1.22719900 | -0.21770400 |
| C  | -3.37150100 | 2.90790100  | 0.08917000  |
| C  | -3.80975600 | -2.22005900 | 0.12992000  |
| Ni | -0.28827500 | 0.05093900  | -0.50691000 |
| Br | 1.92911300  | 0.60440700  | -1.08862900 |
| C  | -3.68687100 | -3.01752700 | -1.18789800 |
| H  | -2.63661800 | -3.26429600 | -1.39857800 |
| H  | -4.26046700 | -3.95521300 | -1.11606200 |
| H  | -4.08376300 | -2.43856900 | -2.03759700 |
| C  | -5.28877600 | -1.90374100 | 0.39590100  |
| H  | -5.85325700 | -2.84488000 | 0.48603200  |
| H  | -5.42618500 | -1.34293600 | 1.33320700  |
| H  | -5.73872800 | -1.32467400 | -0.42510700 |
| C  | -3.24759500 | -3.05863700 | 1.29887700  |
| H  | -3.32562900 | -2.50982300 | 2.25143700  |
| H  | -3.81724600 | -3.99619600 | 1.39731400  |
| H  | -2.19040400 | -3.30667500 | 1.12888900  |
| C  | -3.09963700 | 3.68145600  | -1.21992800 |
| H  | -3.49950700 | 4.70484300  | -1.14282400 |
| H  | -2.02075400 | 3.73993500  | -1.42127400 |
| H  | -3.58547300 | 3.18839400  | -2.07755400 |

|   |             |            |             |
|---|-------------|------------|-------------|
| C | -4.88485300 | 2.85280500 | 0.34352000  |
| H | -5.42231700 | 2.35841700 | -0.48042200 |
| H | -5.12521900 | 2.32757400 | 1.28069900  |
| H | -5.27822900 | 3.87785000 | 0.42845200  |
| C | -2.68038400 | 3.62616200 | 1.26988500  |
| H | -3.07617000 | 4.64901400 | 1.37174600  |
| H | -2.86289300 | 3.09311000 | 2.21711100  |
| H | -1.59448700 | 3.68392200 | 1.10943900  |

UB3LYP-D3/def2-TZVPP-CPCM(THF)// UB3LYP-D3/def2-SVP-CPCM(THF)  
HF= -4664.0306008  
UM06/def2-TZVPP-CPCM(THF)// UB3LYP-D3/def2-SVP-CPCM(THF)  
HF= -4663.3442077

## <sup>2</sup>A-TMHD

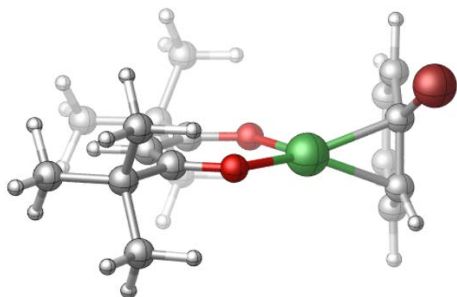

UB3LYP-D3/def2-SVP-CPCM(THF)

Zero-point correction= 0.371812 (Hartree/Particle)

Thermal correction to Energy= 0.396012

Thermal correction to Enthalpy= 0.396956

Thermal correction to Gibbs Free Energy= 0.314402

Sum of electronic and zero-point Energies= -4893.918513

Sum of electronic and thermal Energies= -4893.894313

Sum of electronic and thermal Enthalpies= -4893.893369

Sum of electronic and thermal Free Energies= -4893.975922

|    |             |             |             |
|----|-------------|-------------|-------------|
| C  | -2.35056300 | 1.49763400  | -0.08085100 |
| O  | -1.10960500 | 1.45110100  | -0.33763200 |
| C  | -3.19367000 | 0.36601100  | 0.03381700  |
| H  | -4.23921800 | 0.54154200  | 0.25423300  |
| C  | -2.77418500 | -0.97096700 | -0.12013600 |
| O  | -1.57666200 | -1.32919700 | -0.37629300 |
| C  | -2.90157200 | 2.93116400  | 0.09863400  |
| C  | -3.76813200 | -2.14650600 | 0.00901700  |
| Ni | -0.07491500 | -0.16653800 | -0.64206800 |
| C  | 1.55418400  | 2.72254700  | -1.71182500 |
| C  | 1.45782900  | 1.54447300  | -2.43036700 |
| C  | 1.62478300  | 0.28492900  | -1.78974300 |
| C  | 1.91005300  | 0.27106800  | -0.39159800 |
| C  | 2.04367800  | 1.49041300  | 0.32913700  |
| C  | 1.84316700  | 2.69133100  | -0.32679000 |
| H  | 1.41396600  | 3.68253200  | -2.21343400 |
| H  | 1.26792300  | 1.56399800  | -3.50600800 |
| H  | 2.28974700  | 1.46223700  | 1.39153000  |
| H  | 1.91409000  | 3.62603100  | 0.23439000  |
| H  | 1.76342200  | -0.61570400 | -2.39502800 |
| Br | 2.65175100  | -1.34156700 | 0.40594200  |
| C  | -2.09139300 | 3.59678000  | 1.23197500  |
| H  | -1.01591800 | 3.56642800  | 1.00633500  |
| H  | -2.39813000 | 4.64815900  | 1.35425500  |
| H  | -2.25721700 | 3.07951100  | 2.19139100  |
| C  | -4.39753200 | 2.99040200  | 0.43959900  |
| H  | -5.01698000 | 2.54991700  | -0.35695600 |

|   |             |             |             |
|---|-------------|-------------|-------------|
| H | -4.62378400 | 2.46802800  | 1.38216500  |
| H | -4.70817700 | 4.04070800  | 0.55863100  |
| C | -2.64839900 | 3.68495300  | -1.22544000 |
| H | -3.21915200 | 3.23119400  | -2.05236800 |
| H | -2.96191300 | 4.73731100  | -1.13208300 |
| H | -1.58124000 | 3.65678700  | -1.48825900 |
| C | -3.24958800 | -3.07040100 | 1.13205500  |
| H | -3.88771200 | -3.96486700 | 1.21565800  |
| H | -2.21897900 | -3.39134100 | 0.92429600  |
| H | -3.25977900 | -2.55155500 | 2.10463900  |
| C | -5.20695800 | -1.71727400 | 0.33082900  |
| H | -5.26878700 | -1.17815200 | 1.28885400  |
| H | -5.62897000 | -1.07314100 | -0.45610100 |
| H | -5.84886200 | -2.60918200 | 0.40975400  |
| C | -3.75272900 | -2.90842500 | -1.33445600 |
| H | -2.73172900 | -3.22922200 | -1.58600900 |
| H | -4.39793100 | -3.79982300 | -1.27598900 |
| H | -4.12491600 | -2.27066600 | -2.15299400 |

UB3LYP-D3/def2-TZVPP-CPCM(THF)// UB3LYP-D3/def2-SVP-CPCM(THF)  
HF= -4895.7207494  
UM06/def2-TZVPP-CPCM(THF)// UB3LYP-D3/def2-SVP-CPCM(THF)  
HF= -4894.8531818

Figure S18

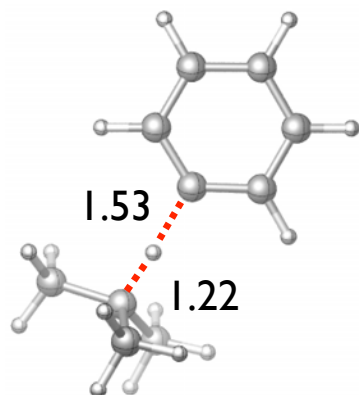

UB3LYP-D3/def2-SVP-CPCM(THF)

|                                              |                             |             |             |
|----------------------------------------------|-----------------------------|-------------|-------------|
| Zero-point correction=                       | 0.213786 (Hartree/Particle) |             |             |
| Thermal correction to Energy=                | 0.225178                    |             |             |
| Thermal correction to Enthalpy=              | 0.226122                    |             |             |
| Thermal correction to Gibbs Free Energy=     | 0.173602                    |             |             |
| Sum of electronic and zero-point Energies=   | -389.540592                 |             |             |
| Sum of electronic and thermal Energies=      | -389.529200                 |             |             |
| Sum of electronic and thermal Enthalpies=    | -389.528256                 |             |             |
| Sum of electronic and thermal Free Energies= | -389.580776                 |             |             |
| C                                            | -1.32452900                 | -5.70999100 | -0.64601400 |
| C                                            | -0.12003600                 | -5.86266600 | -1.56424400 |
| H                                            | 0.68500100                  | -6.43887600 | -1.07969700 |
| H                                            | -0.40152200                 | -6.39634600 | -2.49114200 |
| H                                            | 0.29018200                  | -4.88221700 | -1.85654500 |
| C                                            | -2.41255400                 | -4.81606700 | -1.22439400 |
| H                                            | -2.85986500                 | -5.27816400 | -2.12420100 |
| H                                            | -3.22412400                 | -4.64874100 | -0.49758000 |
| H                                            | -2.01124200                 | -3.83307100 | -1.52055000 |
| C                                            | -1.85409300                 | -7.03864200 | -0.12381800 |
| H                                            | -1.05791200                 | -7.62793500 | 0.35995400  |
| H                                            | -2.66327700                 | -6.88962700 | 0.60966700  |
| H                                            | -2.26260400                 | -7.64800700 | -0.95155300 |
| H                                            | -0.91115000                 | -5.12004400 | 0.34065500  |
| C                                            | -0.40944900                 | -4.39769200 | 1.59793900  |
| C                                            | -0.09322600                 | -3.04791900 | 1.51310700  |
| C                                            | -0.29669600                 | -5.12910100 | 2.77318600  |
| C                                            | 0.36202000                  | -2.39719300 | 2.67184400  |
| H                                            | -0.19342200                 | -2.49804600 | 0.57204800  |
| C                                            | 0.15955400                  | -4.46946500 | 3.92654200  |
| H                                            | -0.55527800                 | -6.19197700 | 2.80758700  |
| C                                            | 0.48683500                  | -3.10845500 | 3.87230300  |
| H                                            | 0.61887800                  | -1.33435500 | 2.63568700  |
| H                                            | 0.25853600                  | -5.01968900 | 4.86691500  |



H 0.84136300 -2.59837600 4.77177200  
UB3LYP-D3/def2-TZVPP-CPCM(THF)// UB3LYP-D3/def2-SVP-CPCM(THF)  
HF= -390.1859701  
UM06/def2-TZVPP-CPCM(THF)// UB3LYP-D3/def2-SVP-CPCM(THF)  
HF= -389.8284779

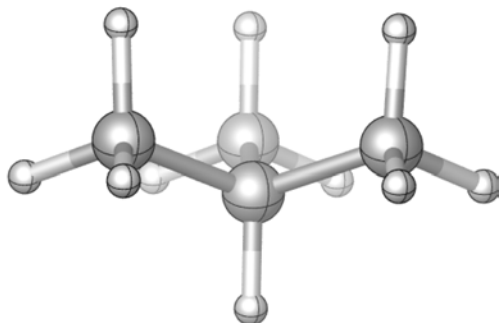

UB3LYP-D3/def2-SVP-CPCM(THF)

Zero-point correction= 0.130747 (Hartree/Particle)  
 Thermal correction to Energy= 0.136352  
 Thermal correction to Enthalpy= 0.137297  
 Thermal correction to Gibbs Free Energy= 0.103241  
 Sum of electronic and zero-point Energies= -158.220710  
 Sum of electronic and thermal Energies= -158.215105  
 Sum of electronic and thermal Enthalpies= -158.214161  
 Sum of electronic and thermal Free Energies= -158.248216

|   |             |             |             |
|---|-------------|-------------|-------------|
| C | -1.35880900 | -5.74058300 | -0.69920900 |
| C | -0.82369700 | -4.98911000 | -1.92428400 |
| H | 0.27857000  | -4.96727300 | -1.93406700 |
| H | -1.15671900 | -5.47685400 | -2.85723600 |
| H | -1.18260900 | -3.94683300 | -1.94599900 |
| C | -2.89193400 | -5.72268600 | -0.66606700 |
| H | -3.30687200 | -6.23708900 | -1.55062800 |
| H | -3.28129200 | -6.23329100 | 0.23015200  |
| H | -3.28288100 | -4.69183400 | -0.66506000 |
| C | -0.82205700 | -7.17657400 | -0.65350800 |
| H | 0.28028500  | -7.19472100 | -0.64411100 |
| H | -1.17672700 | -7.71082400 | 0.24334200  |
| H | -1.15825600 | -7.74716700 | -1.53709700 |
| H | -0.99537000 | -5.21550400 | 0.20414900  |

UB3LYP-D3/def2-TZVPP-CPCM(THF)// UB3LYP-D3/def2-SVP-CPCM(THF)

HF= -158.5324782

UM06/def2-TZVPP-CPCM(THF)// UB3LYP-D3/def2-SVP-CPCM(THF)

HF= -158.3793557

**Figure S19**

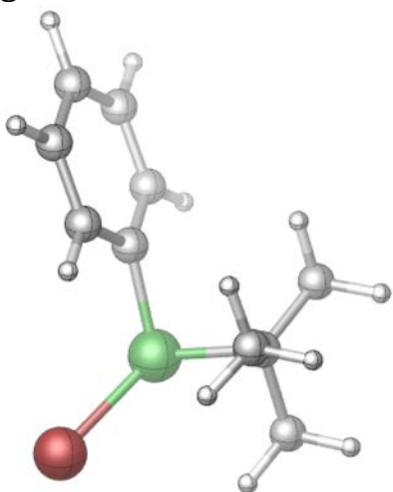

UB3LYP-D3/def2-SVP-CPCM(THF)

|                                              |                             |             |             |
|----------------------------------------------|-----------------------------|-------------|-------------|
| Zero-point correction=                       | 0.211223 (Hartree/Particle) |             |             |
| Thermal correction to Energy=                | 0.225662                    |             |             |
| Thermal correction to Enthalpy=              | 0.226607                    |             |             |
| Thermal correction to Gibbs Free Energy=     | 0.167821                    |             |             |
| Sum of electronic and zero-point Energies=   | -4471.112669                |             |             |
| Sum of electronic and thermal Energies=      | -4471.098230                |             |             |
| Sum of electronic and thermal Enthalpies=    | -4471.097286                |             |             |
| Sum of electronic and thermal Free Energies= | -4471.156071                |             |             |
| C                                            | 2.85880600                  | 0.74317800  | 0.23337800  |
| C                                            | 3.89346800                  | -0.36358800 | 0.23547100  |
| C                                            | 2.89142500                  | 1.59192300  | -1.03876300 |
| H                                            | 3.79736600                  | -1.00840200 | -0.65008500 |
| H                                            | 3.80865900                  | -0.98854000 | 1.13475300  |
| H                                            | 2.83855000                  | 0.98998300  | -1.95855600 |
| H                                            | 2.09760800                  | 2.35745600  | -1.06205300 |
| Br                                           | 1.03762700                  | -1.52014500 | -2.04620800 |
| Ni                                           | 1.11076700                  | -0.01515500 | -0.20188300 |
| C                                            | 0.91749900                  | -0.80812000 | 1.49745800  |
| C                                            | 0.23763100                  | -0.12580100 | 2.51524500  |
| C                                            | 1.28575200                  | -2.14699300 | 1.68565300  |
| C                                            | -0.07912200                 | -0.78179600 | 3.71312800  |
| H                                            | -0.04145600                 | 0.92453500  | 2.38833100  |
| C                                            | 0.97451500                  | -2.79953400 | 2.88509200  |
| H                                            | 1.80903300                  | -2.68372300 | 0.89031400  |
| H                                            | -0.61299000                 | -0.24450900 | 4.50216000  |
| H                                            | 1.26392600                  | -3.84500600 | 3.02485900  |
| C                                            | 0.29169800                  | -2.11808000 | 3.90012700  |
| H                                            | 0.05055000                  | -2.62804200 | 4.83649700  |
| H                                            | 4.90621400                  | 0.08337100  | 0.22516700  |
| H                                            | 3.85381700                  | 2.13871200  | -1.06186100 |

|   |            |            |            |
|---|------------|------------|------------|
| C | 2.86935900 | 1.59626600 | 1.48856300 |
| H | 2.00503800 | 2.27775800 | 1.52880400 |
| H | 2.86822500 | 0.98299600 | 2.39880000 |
| H | 3.78220400 | 2.22164500 | 1.49347700 |

UB3LYP-D3/def2-TZVPP-CPCM(THF)//UB3LYP-D3/def2-SVP-CPCM(THF)  
HF= -4472.2797924

UM06/def2-TZVPP-CPCM(THF)//UB3LYP-D3/def2-SVP-CPCM(THF)  
HF= -4471.7023257

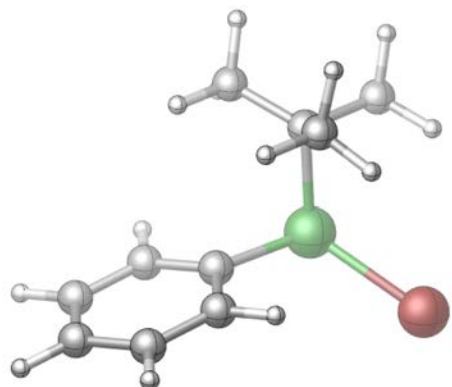

UB3LYP-D3/def2-SVP-CPCM(THF)

Zero-point correction= 0.211070 (Hartree/Particle)

Thermal correction to Energy= 0.225625

Thermal correction to Enthalpy= 0.226569

Thermal correction to Gibbs Free Energy= 0.166740

Sum of electronic and zero-point Energies= -4471.112594

Sum of electronic and thermal Energies= -4471.098040

Sum of electronic and thermal Enthalpies= -4471.097096

Sum of electronic and thermal Free Energies= -4471.156924

|    |             |             |             |
|----|-------------|-------------|-------------|
| Ni | -0.69015100 | -0.10048000 | 0.06690000  |
| C  | -1.96369900 | 1.24956000  | -0.26283500 |
| C  | -3.75785000 | 3.24547600  | -1.08695500 |
| C  | -3.28369100 | 0.91615600  | -0.59356900 |
| C  | -1.54374900 | 2.58408400  | -0.34634400 |
| C  | -2.43860100 | 3.58003200  | -0.76273900 |
| C  | -4.17889400 | 1.91239800  | -1.00231600 |
| H  | -3.61298600 | -0.12420000 | -0.53461900 |
| H  | -0.52004100 | 2.86087800  | -0.07631200 |
| H  | -2.10321300 | 4.61904300  | -0.82766500 |
| H  | -5.20867000 | 1.64572900  | -1.25680800 |
| Br | -1.01456200 | -2.11044000 | -1.14130800 |
| C  | -1.03216700 | -0.11144300 | 1.98866700  |
| H  | -4.45861200 | 4.02270400  | -1.40299600 |
| C  | 0.07143200  | -1.13149100 | 2.27540100  |
| H  | 0.11860800  | -1.28593800 | 3.37058600  |
| H  | -0.12193100 | -2.10897700 | 1.81056400  |
| H  | 1.07300700  | -0.78180000 | 1.97154100  |
| C  | -2.41490100 | -0.64855700 | 2.29100800  |
| H  | -3.19423400 | 0.09351200  | 2.07311600  |
| H  | -2.62479500 | -1.55971000 | 1.71081700  |
| H  | -2.47953600 | -0.90882600 | 3.36492000  |
| C  | -0.73489600 | 1.24114900  | 2.61122300  |
| H  | 0.21051300  | 1.66488300  | 2.23478800  |
| H  | -1.53801100 | 1.96418300  | 2.41945300  |
| H  | -0.62753400 | 1.12405900  | 3.70638000  |

UB3LYP-D3/def2-TZVPP-CPCM(THF)//UB3LYP-D3/def2-SVP-CPCM(THF)

HF= -4472.279756

UM06/def2-TZVPP-CPCM(THF)//UB3LYP-D3/def2-SVP-CPCM(THF)

HF= -4471.7027401

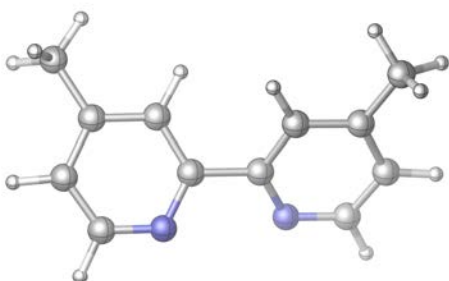

UB3LYP-D3/def2-SVP-CPCM(THF)

Zero-point correction= 0.212040 (Hartree/Particle)  
 Thermal correction to Energy= 0.224472  
 Thermal correction to Enthalpy= 0.225417  
 Thermal correction to Gibbs Free Energy= 0.170903  
 Sum of electronic and zero-point Energies= -573.414733  
 Sum of electronic and thermal Energies= -573.402300  
 Sum of electronic and thermal Enthalpies= -573.401356  
 Sum of electronic and thermal Free Energies= -573.455869

|   |             |             |             |
|---|-------------|-------------|-------------|
| C | -2.31575100 | -1.15742200 | -0.05825600 |
| C | -0.91697700 | -1.27194600 | 0.02278700  |
| C | -0.22447200 | -0.70695500 | 1.10164900  |
| C | -0.99218900 | -0.04466300 | 2.07014800  |
| C | -2.37809600 | 0.02559400  | 1.90563400  |
| C | -3.07072300 | -1.75985500 | -1.20231200 |
| C | -2.63843200 | -2.95842800 | -1.79813600 |
| C | -3.35500200 | -3.51359600 | -2.86541400 |
| C | -4.49796800 | -2.81983100 | -3.28994600 |
| C | -4.85559900 | -1.63801000 | -2.63699400 |
| H | -0.36149000 | -1.78401300 | -0.76571600 |
| H | -0.51932900 | 0.41415800  | 2.94221800  |
| H | -2.98834200 | 0.54166500  | 2.65702300  |
| H | -1.75618600 | -3.47459000 | -1.41410900 |
| H | -5.10737900 | -3.19713900 | -4.11514400 |
| H | -5.74810300 | -1.08816000 | -2.96001800 |
| N | -3.03302700 | -0.50956800 | 0.87394100  |
| N | -4.17073800 | -1.11301100 | -1.61872400 |
| C | -2.91853600 | -4.78894400 | -3.53673600 |
| H | -2.16322000 | -5.32437400 | -2.94346500 |
| H | -3.77370400 | -5.46175800 | -3.70579800 |
| H | -2.47910300 | -4.57147800 | -4.52509600 |
| C | 1.27668300  | -0.77649400 | 1.19822700  |
| H | 1.60731200  | -0.85611700 | 2.24488300  |
| H | 1.68075800  | -1.63018200 | 0.63440200  |
| H | 1.72933200  | 0.14008200  | 0.78228300  |

UB3LYP-D3/def2-TZVPP-CPCM(THF)//UB3LYP-D3/def2-SVP-CPCM(THF)

HF= -574.2558479

UM06/def2-TZVPP-CPCM(THF)//UB3LYP-D3/def2-SVP-CPCM(THF)

HF= -573.7901558



### <sup>1</sup>F-DMA-O

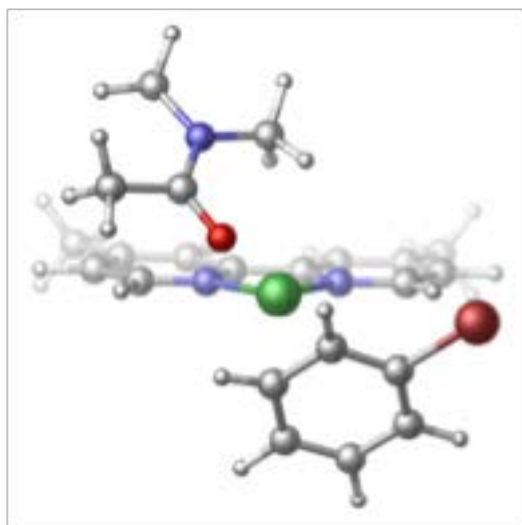

UB3LYP-D3/def2-SVP-CPCM(THF)

Zero-point correction= 0.435353 (Hartree/Particle)

Thermal correction to Energy= 0.465364

Thermal correction to Enthalpy= 0.466308

Thermal correction to Gibbs Free Energy= 0.371774

Sum of electronic and zero-point Energies= -5174.442026

Sum of electronic and thermal Energies= -5174.412014

Sum of electronic and thermal Enthalpies= -5174.411070

Sum of electronic and thermal Free Energies= -5174.505604

|    |             |             |             |
|----|-------------|-------------|-------------|
| C  | -1.99573800 | 1.70563600  | 1.27592200  |
| O  | -1.57857800 | 0.71672600  | 0.64048900  |
| N  | -2.89472400 | 2.56501500  | 0.75010400  |
| C  | -1.47410900 | 1.95364900  | 2.67628200  |
| H  | -1.11216300 | 2.98325600  | 2.81198000  |
| H  | -2.26334600 | 1.76787100  | 3.42184500  |
| H  | -0.65298600 | 1.24992700  | 2.85587800  |
| C  | -3.33995100 | 2.40820300  | -0.63035700 |
| H  | -4.25568400 | 1.79961900  | -0.69048700 |
| H  | -3.54156900 | 3.40275500  | -1.05441600 |
| H  | -2.55717000 | 1.92011100  | -1.22281600 |
| C  | -3.58663900 | 3.59887300  | 1.50728500  |
| H  | -4.67135200 | 3.39904700  | 1.50070200  |
| H  | -3.25493700 | 3.63050100  | 2.54901400  |
| H  | -3.41506200 | 4.58905900  | 1.05431700  |
| Ni | -2.83422400 | -0.70330200 | -0.47307400 |
| C  | -2.12470800 | -3.48520000 | -0.24809200 |
| C  | -1.46424900 | -2.23640700 | -0.06587200 |
| C  | -0.92329800 | -1.56582200 | -1.20744300 |
| C  | -1.06246300 | -2.17899900 | -2.47563400 |
| C  | -1.73841200 | -3.37384900 | -2.65124100 |

|    |             |             |             |
|----|-------------|-------------|-------------|
| C  | -2.27633700 | -4.02521900 | -1.51351100 |
| H  | -2.51370100 | -4.01365500 | 0.62537200  |
| H  | -1.14288900 | -1.93603900 | 0.93594900  |
| H  | -1.85101900 | -3.80954600 | -3.64483900 |
| H  | -2.80536800 | -4.97206300 | -1.64706800 |
| H  | -0.24789300 | -0.71828200 | -1.08343100 |
| Br | -0.30699000 | -1.28484100 | -3.99442100 |
| C  | -5.58488100 | -0.71657100 | -1.26670300 |
| C  | -6.73781400 | -0.77640800 | -2.10429200 |
| C  | -6.62620500 | -0.92475200 | -3.47360800 |
| C  | -5.31084700 | -1.01892300 | -4.02328900 |
| C  | -4.22414500 | -0.96917600 | -3.16702200 |
| C  | -5.62452000 | -0.53277000 | 0.15671400  |
| C  | -6.81183900 | -0.35572400 | 0.92827500  |
| C  | -6.75854700 | -0.17742000 | 2.29830500  |
| C  | -5.47215700 | -0.17843900 | 2.92135100  |
| C  | -4.35230300 | -0.35121800 | 2.12428400  |
| H  | -7.72971900 | -0.70607800 | -1.65381300 |
| H  | -5.15633400 | -1.12736700 | -5.09888200 |
| H  | -3.20818600 | -1.04370200 | -3.56061600 |
| H  | -7.78206500 | -0.35573300 | 0.42787800  |
| H  | -5.36804800 | -0.05364900 | 4.00110500  |
| H  | -3.34962000 | -0.36151400 | 2.56330400  |
| N  | -4.32004800 | -0.82323300 | -1.83343800 |
| N  | -4.39581800 | -0.51921400 | 0.79480000  |
| C  | -7.99766800 | 0.01327800  | 3.13136200  |
| H  | -8.91250800 | -0.01112300 | 2.52081600  |
| H  | -8.07819400 | -0.77190300 | 3.90309800  |
| H  | -7.96779700 | 0.97738100  | 3.66821900  |
| C  | -7.82822500 | -0.98815700 | -4.37703000 |
| H  | -7.85017400 | -1.93823500 | -4.93878200 |
| H  | -8.77061600 | -0.89980000 | -3.81620200 |
| H  | -7.79867700 | -0.18096600 | -5.12951400 |

UB3LYP-D3/def2-TZVPP-CPCM(THF)// UB3LYP-D3/def2-SVP-CPCM(THF)  
HF= -5176.5999679  
UM06/def2-TZVPP-CPCM(THF)// UB3LYP-D3/def2-SVP-CPCM(THF)  
HF= -5175.5019016

# <sup>1</sup>F-DMA'

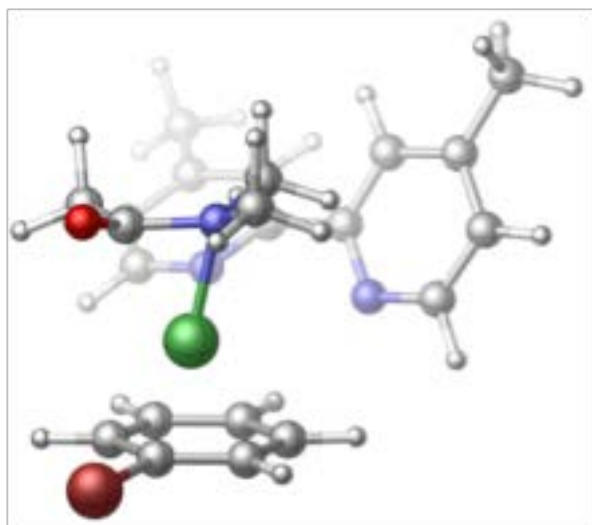

UB3LYP-D3/def2-SVP-CPCM(THF)

Zero-point correction= 0.434398 (Hartree/Particle)

Thermal correction to Energy= 0.465055

Thermal correction to Enthalpy= 0.465999

Thermal correction to Gibbs Free Energy= 0.367305

Sum of electronic and zero-point Energies= -5174.382824

Sum of electronic and thermal Energies= -5174.352168

Sum of electronic and thermal Enthalpies= -5174.351223

Sum of electronic and thermal Free Energies= -5174.449917

|    |             |             |             |
|----|-------------|-------------|-------------|
| C  | -1.97016600 | -0.98194000 | -1.08653400 |
| O  | -2.20401200 | 0.23211900  | -0.94905100 |
| N  | -0.60758500 | -1.45789200 | -1.14294800 |
| C  | -3.05520500 | -1.90925000 | -1.62444700 |
| H  | -3.12003200 | -1.79774700 | -2.72214000 |
| H  | -2.91213600 | -2.96911300 | -1.38454000 |
| H  | -4.00633000 | -1.56981000 | -1.19390600 |
| C  | -0.25349500 | -2.60168900 | -1.99171600 |
| H  | -0.17849100 | -2.30293900 | -3.05367600 |
| H  | 0.71643900  | -3.00280500 | -1.66692700 |
| H  | -0.99124600 | -3.40058900 | -1.88880200 |
| C  | 0.42535300  | -0.41680500 | -1.13844900 |
| H  | 0.58143400  | -0.01349500 | -2.15619400 |
| H  | 0.11223800  | 0.39839900  | -0.47949900 |
| H  | 1.36587800  | -0.85076800 | -0.77147100 |
| Ni | -1.23286100 | -1.97005100 | 0.65837000  |
| C  | -1.08992900 | -3.90407700 | 1.69927000  |
| C  | -2.39999500 | -3.36935600 | 1.70329300  |
| C  | -2.63609200 | -2.04654400 | 2.16848500  |
| C  | -1.53656200 | -1.26833800 | 2.61729100  |
| C  | -0.22206000 | -1.78959600 | 2.61961200  |

|    |             |             |             |
|----|-------------|-------------|-------------|
| C  | -0.01065000 | -3.10841500 | 2.14799900  |
| H  | -0.90472400 | -4.88789900 | 1.26762300  |
| H  | -3.23163500 | -3.96770100 | 1.32849900  |
| H  | 0.61175300  | -1.18009900 | 2.96852300  |
| H  | 1.00757500  | -3.49857800 | 2.10094800  |
| H  | -3.64243600 | -1.62574500 | 2.16820100  |
| Br | -1.85461700 | 0.49234200  | 3.32735600  |
| C  | -0.09040200 | -5.98907000 | -1.79741600 |
| C  | 0.72717800  | -5.82898000 | -2.92735000 |
| C  | 2.08116800  | -5.50137600 | -2.77491200 |
| C  | 2.55601200  | -5.36665300 | -1.46251900 |
| C  | 1.67347400  | -5.56036500 | -0.39654700 |
| C  | -1.55072400 | -6.27313800 | -1.95183000 |
| C  | -2.01040200 | -7.17779800 | -2.92166800 |
| C  | -3.38412000 | -7.41845300 | -3.06355400 |
| C  | -4.24220200 | -6.71770300 | -2.20384900 |
| C  | -3.69645700 | -5.83388600 | -1.26960100 |
| H  | 0.29925600  | -5.92628100 | -3.92752400 |
| H  | 3.60125500  | -5.11375200 | -1.26868300 |
| H  | 2.03505800  | -5.46701800 | 0.63429100  |
| H  | -1.29511900 | -7.71102700 | -3.55197400 |
| H  | -5.32455600 | -6.85832800 | -2.25656300 |
| H  | -4.35677400 | -5.27266200 | -0.59793000 |
| N  | 0.38261000  | -5.86107300 | -0.54841000 |
| N  | -2.38753300 | -5.61150600 | -1.13621600 |
| C  | -3.91142400 | -8.36728900 | -4.10664000 |
| H  | -3.18760700 | -9.16524600 | -4.32932600 |
| H  | -4.85947500 | -8.82725000 | -3.79075500 |
| H  | -4.10602100 | -7.82680900 | -5.04905000 |
| C  | 2.96833300  | -5.25888600 | -3.96637600 |
| H  | 4.01884800  | -5.49575400 | -3.74191900 |
| H  | 2.64880300  | -5.85264100 | -4.83564100 |
| H  | 2.92585600  | -4.19588000 | -4.26012500 |

UB3LYP-D3/def2-TZVPP-CPCM(THF)// UB3LYP-D3/def2-SVP-CPCM(THF)  
HF= -5176.5457794  
UM06/def2-TZVPP-CPCM(THF)// UB3LYP-D3/def2-SVP-CPCM(THF)  
HF= -5175.463106

# <sup>1</sup>G-DMA-O

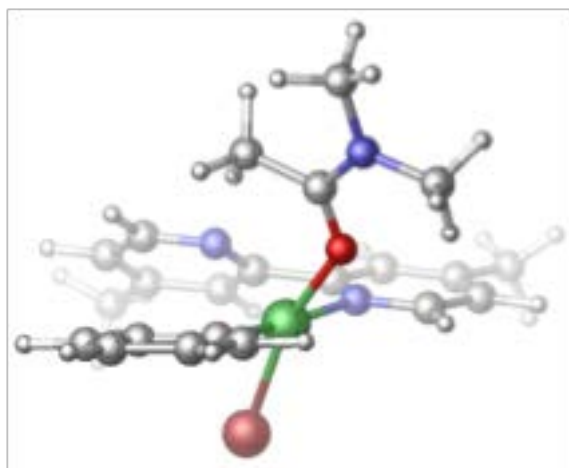

UB3LYP-D3/def2-SVP-CPCM(THF)

Zero-point correction= 0.437417 (Hartree/Particle)

Thermal correction to Energy= 0.467940

Thermal correction to Enthalpy= 0.468884

Thermal correction to Gibbs Free Energy= 0.371580

Sum of electronic and zero-point Energies= -5174.486401

Sum of electronic and thermal Energies= -5174.455878

Sum of electronic and thermal Enthalpies= -5174.454934

Sum of electronic and thermal Free Energies= -5174.552238

|    |             |             |             |
|----|-------------|-------------|-------------|
| C  | -2.51811700 | 0.31763100  | 0.07638600  |
| O  | -1.75704900 | -0.42918400 | -0.58355500 |
| N  | -2.03794100 | 0.99075400  | 1.13756200  |
| C  | -3.96681200 | 0.45866400  | -0.30611300 |
| H  | -4.55773600 | -0.27525200 | 0.26498400  |
| H  | -4.36819500 | 1.46308700  | -0.12181600 |
| H  | -4.04949800 | 0.20330700  | -1.37052500 |
| C  | -2.87060900 | 1.84720400  | 1.97767100  |
| H  | -2.39333500 | 1.94038300  | 2.96236100  |
| H  | -2.97962400 | 2.85839700  | 1.55033500  |
| H  | -3.86665800 | 1.41301600  | 2.13146500  |
| C  | -0.62541000 | 0.90751900  | 1.49514000  |
| H  | -0.19668200 | 1.92010700  | 1.56276800  |
| H  | -0.50684800 | 0.41033900  | 2.47185100  |
| H  | -0.08655700 | 0.33533700  | 0.73370900  |
| Ni | -2.17675500 | -1.82835800 | -1.86714500 |
| C  | -3.43413900 | -3.49580300 | 1.78010300  |
| C  | -2.67291600 | -2.89108000 | 0.76966300  |
| C  | -3.15204600 | -2.77163900 | -0.54921900 |
| C  | -4.43301900 | -3.29451900 | -0.81448900 |
| C  | -5.20936200 | -3.88521500 | 0.19066900  |
| C  | -4.71214100 | -3.99090300 | 1.49636400  |
| H  | -3.02949300 | -3.57586900 | 2.79444400  |

|    |             |             |             |
|----|-------------|-------------|-------------|
| H  | -1.68660800 | -2.48703600 | 1.01852400  |
| H  | -4.82632300 | -3.24467200 | -1.83340900 |
| H  | -6.20606200 | -4.27154400 | -0.04668700 |
| H  | -5.31338900 | -4.45711600 | 2.28225500  |
| Br | -2.08778200 | -3.71370700 | -3.31942000 |
| C  | -3.16586000 | -0.65969400 | -4.64107200 |
| C  | -3.62524100 | -0.99946500 | -5.91967800 |
| C  | -4.96027400 | -1.38708400 | -6.10195100 |
| C  | -5.77973200 | -1.40094300 | -4.96412000 |
| C  | -5.23882800 | -1.03497200 | -3.72942700 |
| C  | -1.74267500 | -0.29293700 | -4.39998500 |
| C  | -0.99936100 | 0.43769100  | -5.33616700 |
| C  | 0.33428100  | 0.77675600  | -5.07833500 |
| C  | 0.86918600  | 0.36373200  | -3.84796800 |
| C  | 0.07257000  | -0.35560600 | -2.96397400 |
| H  | -2.93801600 | -0.99718100 | -6.76814700 |
| H  | -6.82987100 | -1.69394000 | -5.03522200 |
| H  | -5.86283400 | -1.03861300 | -2.82874600 |
| H  | -1.47541400 | 0.76390200  | -6.26241400 |
| H  | 1.90000700  | 0.60148200  | -3.57663900 |
| H  | 0.45598600  | -0.68479900 | -1.99576300 |
| N  | -3.96721800 | -0.67229400 | -3.56429500 |
| N  | -1.19861900 | -0.68518600 | -3.23111300 |
| C  | 1.16437100  | 1.54228400  | -6.07178600 |
| H  | 0.54561600  | 1.98976200  | -6.86246500 |
| H  | 1.73798500  | 2.34099500  | -5.57658600 |
| H  | 1.89556400  | 0.87062000  | -6.55264800 |
| C  | -5.47169300 | -1.81243900 | -7.45188100 |
| H  | -6.55881200 | -1.66825800 | -7.53590100 |
| H  | -4.97664600 | -1.25818600 | -8.26334200 |
| H  | -5.26605300 | -2.88448100 | -7.61430200 |

UB3LYP-D3/def2-TZVPP-CPCM(THF)// UB3LYP-D3/def2-SVP-CPCM(THF)  
HF= -5176.6518013  
UM06/def2-TZVPP-CPCM(THF)// UB3LYP-D3/def2-SVP-CPCM(THF)  
HF= -5175.5492669

**Figure S21 and S22**  
<sup>3</sup>C-complex<sup>i-Pr</sup>

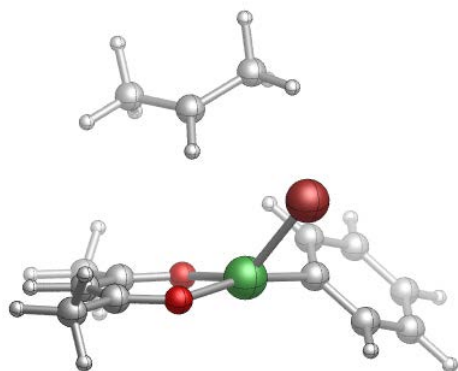

|                                              |                             |             |             |
|----------------------------------------------|-----------------------------|-------------|-------------|
| Zero-point correction=                       | 0.291952 (Hartree/Particle) |             |             |
| Thermal correction to Energy=                | 0.315481                    |             |             |
| Thermal correction to Enthalpy=              | 0.316425                    |             |             |
| Thermal correction to Gibbs Free Energy=     | 0.234171                    |             |             |
| Sum of electronic and zero-point Energies=   | -4776.684870                |             |             |
| Sum of electronic and thermal Energies=      | -4776.661341                |             |             |
| Sum of electronic and thermal Enthalpies=    | -4776.660397                |             |             |
| Sum of electronic and thermal Free Energies= | -4776.742651                |             |             |
| C                                            | -4.50490500                 | -1.15068000 | 1.54684500  |
| O                                            | -4.87134800                 | -0.04408900 | 2.04910500  |
| C                                            | -3.52432800                 | -1.28040200 | 0.53511000  |
| H                                            | -3.27605100                 | -2.28174100 | 0.18558500  |
| C                                            | -2.79989200                 | -0.20410400 | 0.00948400  |
| O                                            | -2.98438600                 | 1.03574600  | 0.29380900  |
| C                                            | -1.68382100                 | -0.44485200 | -0.97467800 |
| H                                            | -1.88701900                 | 0.12811000  | -1.89226200 |
| H                                            | -0.74477400                 | -0.05402500 | -0.55100500 |
| H                                            | -1.55837700                 | -1.50630900 | -1.22338800 |
| C                                            | -5.16894900                 | -2.38075500 | 2.11256900  |
| H                                            | -4.95881100                 | -2.43565700 | 3.19298800  |
| H                                            | -6.26034900                 | -2.27831400 | 2.00323800  |
| H                                            | -4.83623000                 | -3.30840100 | 1.62959100  |
| Ni                                           | -4.33051200                 | 1.72717800  | 1.44177200  |
| C                                            | -3.61921600                 | 3.49090400  | 1.22127800  |
| C                                            | -3.45176700                 | 4.23913100  | 2.38450900  |
| C                                            | -3.14520800                 | 3.92205000  | -0.01420600 |
| C                                            | -2.74296700                 | 5.44886400  | 2.30885700  |
| H                                            | -3.86611500                 | 3.90357200  | 3.33881300  |
| C                                            | -2.45130700                 | 5.13718300  | -0.07901100 |
| H                                            | -3.29581300                 | 3.30994900  | -0.90467200 |
| C                                            | -2.24808800                 | 5.89722800  | 1.08026200  |
| H                                            | -2.59269300                 | 6.04195100  | 3.21502900  |
| H                                            | -2.06601400                 | 5.48690100  | -1.04074500 |
| H                                            | -1.70799400                 | 6.84565900  | 1.02331300  |

|    |             |             |             |
|----|-------------|-------------|-------------|
| Br | -6.44771500 | 2.65360700  | 1.23309800  |
| C  | -5.11552700 | 1.62544300  | -2.28403600 |
| C  | -4.42971800 | 0.77253600  | -3.29549900 |
| H  | -4.25594200 | -0.25077100 | -2.92809100 |
| H  | -5.00850200 | 0.70566000  | -4.23717200 |
| H  | -3.44069100 | 1.18927200  | -3.58548700 |
| C  | -5.60698200 | 2.98852600  | -2.63087500 |
| H  | -6.09475100 | 3.47343300  | -1.77207700 |
| H  | -4.78208400 | 3.65352000  | -2.96502400 |
| H  | -6.32623700 | 2.96524500  | -3.47394800 |
| H  | -5.13465700 | 1.30791000  | -1.23963800 |

UB3LYP-D3/def2-TZVPP-CPCM(DMA)// UB3LYP-D3/def2-SVP-CPCM(THF)  
HF=-4817.61341725  
UM06/def2-TZVPP-CPCM(DMA)// UB3LYP-D3/def2-SVP-CPCM(THF)  
HF= -4816.80636293



1C*i*-Pr

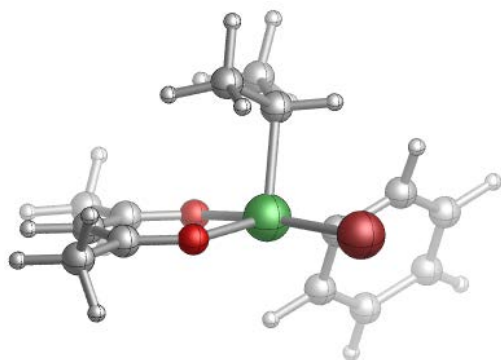

|                                              |                             |             |             |
|----------------------------------------------|-----------------------------|-------------|-------------|
| Zero-point correction=                       | 0.297520 (Hartree/Particle) |             |             |
| Thermal correction to Energy=                | 0.318715                    |             |             |
| Thermal correction to Enthalpy=              | 0.319659                    |             |             |
| Thermal correction to Gibbs Free Energy=     | 0.246597                    |             |             |
| Sum of electronic and zero-point Energies=   | -4776.718715                |             |             |
| Sum of electronic and thermal Energies=      | -4776.697520                |             |             |
| Sum of electronic and thermal Enthalpies=    | -4776.696576                |             |             |
| Sum of electronic and thermal Free Energies= | -4776.769638                |             |             |
| C                                            | -4.26273100                 | -0.32975800 | 0.88325900  |
| O                                            | -5.48402200                 | 0.00752800  | 0.68169600  |
| C                                            | -3.38034400                 | -0.82945700 | -0.07996300 |
| H                                            | -2.36837900                 | -1.08522300 | 0.23092600  |
| C                                            | -3.76492900                 | -1.08155300 | -1.41643700 |
| O                                            | -4.90428300                 | -0.79971000 | -1.89114600 |
| C                                            | -2.79089900                 | -1.72159500 | -2.37446300 |
| H                                            | -3.24196500                 | -2.63947000 | -2.78393400 |
| H                                            | -2.62784600                 | -1.03858900 | -3.22370400 |
| H                                            | -1.82661000                 | -1.96303700 | -1.90881300 |
| C                                            | -3.81451800                 | -0.15170900 | 2.31204900  |
| H                                            | -2.78277800                 | -0.48724800 | 2.47756500  |
| H                                            | -3.90213400                 | 0.91250200  | 2.58507400  |
| H                                            | -4.49525900                 | -0.70914500 | 2.97462600  |
| Ni                                           | -6.41932000                 | 0.06169200  | -0.95042200 |
| C                                            | -8.05687900                 | 0.29108000  | 0.01760800  |
| C                                            | -9.04317800                 | 1.26600900  | -0.15218700 |
| C                                            | -8.23551000                 | -0.72293200 | 0.96570000  |
| C                                            | -10.19712900                | 1.24092600  | 0.64018600  |
| H                                            | -8.93270500                 | 2.04653300  | -0.90690000 |
| C                                            | -9.40114700                 | -0.75480000 | 1.74569400  |
| H                                            | -7.47139600                 | -1.48860900 | 1.11625400  |
| C                                            | -10.38063200                | 0.22978700  | 1.59065800  |
| H                                            | -10.95983800                | 2.01277900  | 0.50390800  |
| H                                            | -9.53226000                 | -1.55152300 | 2.48338700  |
| H                                            | -11.28413500                | 0.20987500  | 2.20541700  |
| Br                                           | -7.66733300                 | -0.10032400 | -2.93012200 |

|   |             |            |             |
|---|-------------|------------|-------------|
| C | -6.09728600 | 2.06783100 | -1.09823400 |
| C | -4.86421300 | 2.12587800 | -1.95693100 |
| H | -3.98270700 | 1.71952500 | -1.43941700 |
| H | -4.99714800 | 1.61084700 | -2.91533100 |
| H | -4.66010000 | 3.19576300 | -2.15927600 |
| H | -7.00456200 | 2.34137600 | -1.64664100 |
| C | -5.98780400 | 2.75420900 | 0.23531300  |
| H | -6.84282300 | 2.54899700 | 0.88981400  |
| H | -5.06152300 | 2.49389800 | 0.76277600  |
| H | -5.97146100 | 3.84284700 | 0.03369600  |

UB3LYP-D3/def2-TZVPP-CPCM(DMA)// UB3LYP-D3/def2-SVP-CPCM(THF)  
HF= -4778.31828595  
UM06/def2-TZVPP-CPCM(DMA)// UB3LYP-D3/def2-SVP-CPCM(THF)  
HF= -4777.53911766

1C'Ad

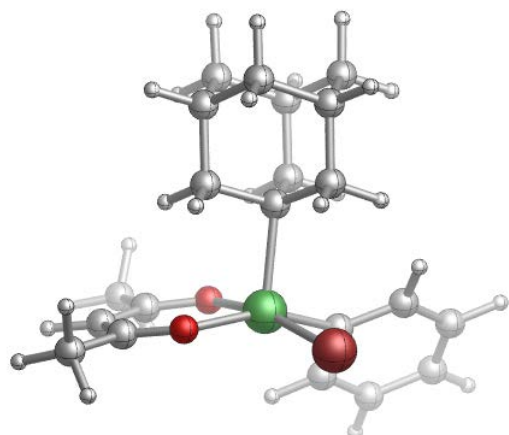

|                                              |                             |             |             |
|----------------------------------------------|-----------------------------|-------------|-------------|
| Zero-point correction=                       | 0.437415 (Hartree/Particle) |             |             |
| Thermal correction to Energy=                | 0.461985                    |             |             |
| Thermal correction to Enthalpy=              | 0.462930                    |             |             |
| Thermal correction to Gibbs Free Energy=     | 0.382855                    |             |             |
| Sum of electronic and zero-point Energies=   | -5047.993260                |             |             |
| Sum of electronic and thermal Energies=      | -5047.968689                |             |             |
| Sum of electronic and thermal Enthalpies=    | -5047.967745                |             |             |
| Sum of electronic and thermal Free Energies= | -5048.047820                |             |             |
| C                                            | -4.43468200                 | -0.23717600 | 0.96563600  |
| O                                            | -5.63063900                 | 0.17719300  | 0.76541200  |
| C                                            | -3.53913800                 | -0.66722700 | -0.01969400 |
| H                                            | -2.54843700                 | -0.99537800 | 0.29203500  |
| C                                            | -3.86018300                 | -0.69469700 | -1.39633600 |
| O                                            | -4.97313600                 | -0.33049400 | -1.87551300 |
| C                                            | -2.82915900                 | -1.15406300 | -2.39894800 |
| H                                            | -3.28876100                 | -1.88280400 | -3.08401900 |
| H                                            | -2.52215300                 | -0.28777900 | -3.00863400 |
| H                                            | -1.93913200                 | -1.59320500 | -1.92938900 |
| C                                            | -4.01701000                 | -0.21032800 | 2.41514700  |
| H                                            | -4.75884300                 | -0.75938900 | 3.01585500  |
| H                                            | -3.01925100                 | -0.63829200 | 2.57712800  |
| H                                            | -4.02588200                 | 0.83402600  | 2.76813400  |
| Ni                                           | -6.58537800                 | 0.27486400  | -0.87403600 |
| C                                            | -8.23065100                 | 0.18830000  | 0.11302300  |
| C                                            | -9.38838100                 | 0.95737400  | -0.03924200 |
| C                                            | -8.23130200                 | -0.87031500 | 1.03189300  |
| C                                            | -10.51933900                | 0.70313800  | 0.74559700  |
| H                                            | -9.42878500                 | 1.75477900  | -0.78071100 |
| C                                            | -9.37136000                 | -1.13661200 | 1.80513200  |
| H                                            | -7.34523200                 | -1.49331100 | 1.16546000  |
| C                                            | -10.51541800                | -0.34591600 | 1.67233500  |
| H                                            | -11.41160100                | 1.32293000  | 0.61937100  |
| H                                            | -9.35412900                 | -1.96526100 | 2.51897100  |

|    |              |             |             |
|----|--------------|-------------|-------------|
| H  | -11.40032900 | -0.54739500 | 2.28160600  |
| Br | -7.82631400  | -0.08224600 | -2.83680800 |
| C  | -4.86888900  | 2.49814000  | -1.18010100 |
| H  | -4.66416300  | 2.08205600  | -2.17429500 |
| H  | -4.24168300  | 1.97428200  | -0.44909800 |
| C  | -6.34184500  | 2.39288000  | -0.84527500 |
| C  | -4.50641700  | 4.01939000  | -1.16399200 |
| H  | -3.43319900  | 4.10577900  | -1.40007500 |
| C  | -5.34808000  | 4.75003500  | -2.22143000 |
| H  | -5.13013300  | 4.34938300  | -3.22530000 |
| H  | -5.08808900  | 5.82190700  | -2.23530800 |
| C  | -7.18702000  | 3.04934700  | -1.91445700 |
| H  | -8.25940200  | 2.91950200  | -1.72799600 |
| H  | -6.96178200  | 2.63617100  | -2.90423200 |
| C  | -6.83901300  | 4.57486400  | -1.89206200 |
| H  | -7.46108900  | 5.06625700  | -2.65779700 |
| C  | -7.14221400  | 5.15760600  | -0.50287900 |
| H  | -6.91855300  | 6.23784100  | -0.49205000 |
| H  | -8.21399500  | 5.04675800  | -0.26777500 |
| C  | -6.65936500  | 2.91466300  | 0.54025900  |
| H  | -6.08277400  | 2.37795100  | 1.30202100  |
| H  | -7.72461700  | 2.79909500  | 0.77294500  |
| C  | -4.79585900  | 4.59391900  | 0.23195600  |
| H  | -4.18630300  | 4.07566800  | 0.99119800  |
| H  | -4.51625400  | 5.66051200  | 0.26485800  |
| C  | -6.29075800  | 4.43118800  | 0.55111100  |
| H  | -6.51108900  | 4.82321400  | 1.55745700  |

UB3LYP-D3/def2-TZVPP-CPCM(DMA)// UB3LYP-D3/def2-SVP-CPCM(THF)  
HF= -5050.01092587  
UM06/def2-TZVPP-CPCM(DMA)// UB3LYP-D3/def2-SVP-CPCM(THF)  
HF= -5049.00795149

### 1C''-complex<sup>i-Pr</sup>

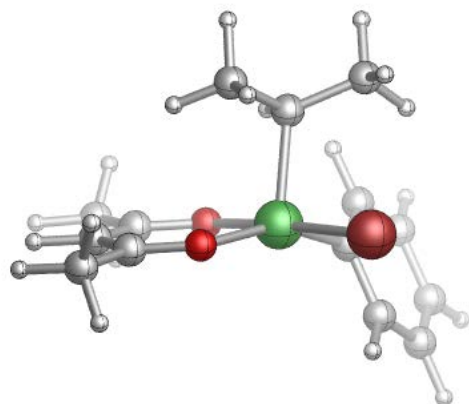

|                                              |                             |             |             |
|----------------------------------------------|-----------------------------|-------------|-------------|
| Zero-point correction=                       | 0.297586 (Hartree/Particle) |             |             |
| Thermal correction to Energy=                | 0.318784                    |             |             |
| Thermal correction to Enthalpy=              | 0.319728                    |             |             |
| Thermal correction to Gibbs Free Energy=     | 0.246639                    |             |             |
| Sum of electronic and zero-point Energies=   | -4776.714077                |             |             |
| Sum of electronic and thermal Energies=      | -4776.692879                |             |             |
| Sum of electronic and thermal Enthalpies=    | -4776.691935                |             |             |
| Sum of electronic and thermal Free Energies= | -4776.765024                |             |             |
| C                                            | -4.71394900                 | -0.83682200 | 1.41221400  |
| O                                            | -4.96334000                 | 0.31835300  | 1.91336500  |
| C                                            | -3.79101400                 | -1.11077400 | 0.39737800  |
| H                                            | -3.69214900                 | -2.14071900 | 0.05733900  |
| C                                            | -3.01247000                 | -0.11220400 | -0.23128300 |
| O                                            | -3.01644500                 | 1.10855800  | 0.10530200  |
| C                                            | -2.09747300                 | -0.47872000 | -1.37378800 |
| H                                            | -2.11986300                 | -1.54930700 | -1.61525800 |
| H                                            | -2.38705800                 | 0.10316800  | -2.26352600 |
| H                                            | -1.06870200                 | -0.17986100 | -1.11674100 |
| C                                            | -5.53236100                 | -1.94915000 | 2.01885800  |
| H                                            | -5.31999400                 | -2.00026600 | 3.09889300  |
| H                                            | -6.60215600                 | -1.70916400 | 1.91294500  |
| H                                            | -5.32724400                 | -2.92455600 | 1.55948600  |
| Ni                                           | -4.09501000                 | 1.95354900  | 1.54168100  |
| C                                            | -3.04178000                 | 1.74801500  | 3.28615000  |
| C                                            | -2.78031600                 | 3.00241500  | 4.07332000  |
| H                                            | -2.44997000                 | 2.68019700  | 5.08024400  |
| H                                            | -1.98767900                 | 3.61381600  | 3.62531200  |
| H                                            | -3.67732100                 | 3.61969300  | 4.20166700  |
| C                                            | -1.81892600                 | 1.00651300  | 2.82222100  |
| H                                            | -1.22553000                 | 0.76413800  | 3.72576300  |
| H                                            | -2.05787700                 | 0.05950600  | 2.32267400  |
| H                                            | -1.19275500                 | 1.62443600  | 2.16442000  |
| C                                            | -5.60201600                 | 2.80182900  | 2.36851200  |

|    |             |            |            |
|----|-------------|------------|------------|
| C  | -6.08675100 | 2.53451400 | 3.65025400 |
| C  | -6.37717500 | 3.55231700 | 1.47551300 |
| C  | -7.33172500 | 3.03849900 | 4.05039900 |
| H  | -5.51981400 | 1.92294500 | 4.35362900 |
| C  | -7.62931900 | 4.04192000 | 1.87471000 |
| H  | -6.01458000 | 3.77186700 | 0.46955100 |
| C  | -8.10706200 | 3.79351300 | 3.16459400 |
| H  | -7.69723100 | 2.82679200 | 5.05920700 |
| H  | -8.22491700 | 4.62800800 | 1.16911600 |
| H  | -9.07898300 | 4.18346400 | 3.47749200 |
| Br | -3.10094400 | 4.00210200 | 0.96810200 |
| H  | -3.77534000 | 1.09081800 | 3.76577800 |

UB3LYP-D3/def2-TZVPP-CPCM(DMA)// UB3LYP-D3/def2-SVP-CPCM(THF)

HF= -4778.31370771

UM06/def2-TZVPP-CPCM(DMA)// UB3LYP-D3/def2-SVP-CPCM(THF)

HF= -4777.53485701

### **<sup>1</sup>C''-complex<sup>Ad</sup>**

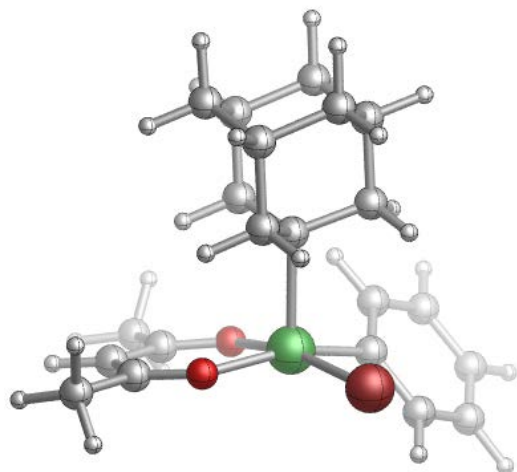

|                                              |                             |             |             |
|----------------------------------------------|-----------------------------|-------------|-------------|
| Zero-point correction=                       | 0.437465 (Hartree/Particle) |             |             |
| Thermal correction to Energy=                | 0.462034                    |             |             |
| Thermal correction to Enthalpy=              | 0.462978                    |             |             |
| Thermal correction to Gibbs Free Energy=     | 0.382950                    |             |             |
| Sum of electronic and zero-point Energies=   | -5047.990295                |             |             |
| Sum of electronic and thermal Energies=      | -5047.965725                |             |             |
| Sum of electronic and thermal Enthalpies=    | -5047.964781                |             |             |
| Sum of electronic and thermal Free Energies= | -5048.044810                |             |             |
| C                                            | -5.00425600                 | -0.26788700 | 0.89142900  |
| O                                            | -6.20763300                 | -0.09658300 | 0.49061000  |
| C                                            | -3.92294100                 | -0.63981800 | 0.08489000  |
| H                                            | -2.94211000                 | -0.74516000 | 0.54650700  |
| C                                            | -4.05834100                 | -0.91786900 | -1.29336000 |
| O                                            | -5.14597900                 | -0.82709000 | -1.93726700 |
| C                                            | -2.85361600                 | -1.33961400 | -2.09877100 |
| H                                            | -3.09933600                 | -2.24865600 | -2.66908500 |
| H                                            | -2.62663900                 | -0.55028500 | -2.83475200 |
| H                                            | -1.96501300                 | -1.51818300 | -1.47930700 |
| C                                            | -4.80793300                 | -0.01038900 | 2.36445900  |
| H                                            | -3.78175400                 | -0.21092500 | 2.69861400  |
| H                                            | -5.06313200                 | 1.04066800  | 2.57685000  |
| H                                            | -5.51238900                 | -0.63330200 | 2.93768500  |
| Ni                                           | -6.90807900                 | -0.25022800 | -1.26341200 |
| C                                            | -8.63211600                 | -0.13074400 | -0.38893200 |
| C                                            | -8.86934400                 | 0.84796400  | 0.58480500  |
| C                                            | -9.56877900                 | -1.16303200 | -0.53966600 |
| C                                            | -10.03786500                | 0.83357700  | 1.35447300  |
| H                                            | -8.13073900                 | 1.62753500  | 0.77055200  |
| C                                            | -10.73242100                | -1.19106000 | 0.24524300  |
| H                                            | -9.40861800                 | -1.95228000 | -1.27397800 |
| C                                            | -10.97907400                | -0.18855300 | 1.18566700  |
| H                                            | -10.20362900                | 1.61892600  | 2.09767500  |

|    |              |             |             |
|----|--------------|-------------|-------------|
| H  | -11.44968000 | -2.00568000 | 0.10819400  |
| H  | -11.89158500 | -0.20537700 | 1.78748400  |
| Br | -7.87407100  | -0.91544200 | -3.32141600 |
| C  | -6.95241000  | 4.63241400  | -1.45962800 |
| H  | -6.77787700  | 5.68900000  | -1.72357900 |
| H  | -7.57063200  | 4.62556600  | -0.54643000 |
| C  | -5.60910400  | 3.93191200  | -1.19863500 |
| H  | -5.07774200  | 4.41776800  | -0.36418300 |
| C  | -7.68932700  | 3.91934400  | -2.60538300 |
| H  | -8.66405700  | 4.39922800  | -2.79056300 |
| C  | -6.83291200  | 3.93696800  | -3.87980400 |
| H  | -6.65234000  | 4.97726200  | -4.19944100 |
| H  | -7.36516400  | 3.43248800  | -4.70306600 |
| C  | -4.74589100  | 3.95079400  | -2.46905000 |
| H  | -3.77825900  | 3.45721400  | -2.27934300 |
| H  | -4.52747500  | 4.99215200  | -2.75978100 |
| C  | -5.49624600  | 3.23318400  | -3.60106100 |
| H  | -4.87864000  | 3.20487900  | -4.51356400 |
| C  | -5.77110800  | 1.75099000  | -3.18032800 |
| H  | -6.28957300  | 1.22636700  | -3.98975300 |
| H  | -4.81947800  | 1.24232800  | -2.99613300 |
| C  | -5.87600300  | 2.44612500  | -0.78263100 |
| H  | -6.45320600  | 2.42802400  | 0.14897700  |
| H  | -4.91587500  | 1.94283500  | -0.60564500 |
| C  | -7.96891600  | 2.43660100  | -2.18948600 |
| H  | -8.60512100  | 2.43346300  | -1.29925300 |
| H  | -8.49574500  | 1.90864900  | -2.99410700 |
| C  | -6.62208300  | 1.80550400  | -1.92723900 |

UB3LYP-D3/def2-TZVPP-CPCM(DMA)// UB3LYP-D3/def2-SVP-CPCM(THF)  
HF= -5050.01092587  
UM06/def2-TZVPP-CPCM(DMA)// UB3LYP-D3/def2-SVP-CPCM(THF)  
HF= -5049.00795149



**1C'-TS<sup>i</sup>-Pr**

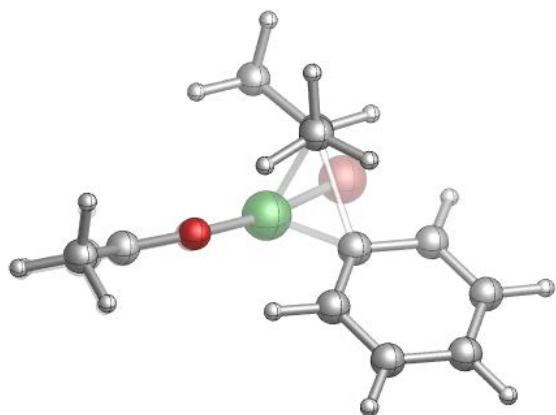

|                                              |                             |             |             |
|----------------------------------------------|-----------------------------|-------------|-------------|
| Zero-point correction=                       | 0.297700 (Hartree/Particle) |             |             |
| Thermal correction to Energy=                | 0.318234                    |             |             |
| Thermal correction to Enthalpy=              | 0.319178                    |             |             |
| Thermal correction to Gibbs Free Energy=     | 0.247594                    |             |             |
| Sum of electronic and zero-point Energies=   | -4776.703604                |             |             |
| Sum of electronic and thermal Energies=      | -4776.683070                |             |             |
| Sum of electronic and thermal Enthalpies=    | -4776.682126                |             |             |
| Sum of electronic and thermal Free Energies= | -4776.753710                |             |             |
| C                                            | -3.98117100                 | -0.38342000 | 0.70411400  |
| O                                            | -5.08969800                 | 0.21721900  | 0.49156100  |
| C                                            | -3.32399300                 | -1.20475000 | -0.21926400 |
| H                                            | -2.38337900                 | -1.67194700 | 0.06838000  |
| C                                            | -3.85483700                 | -1.46525500 | -1.49621700 |
| O                                            | -4.93772100                 | -0.97201700 | -1.94555200 |
| C                                            | -3.13566300                 | -2.39152600 | -2.44479200 |
| H                                            | -3.80094700                 | -3.23338200 | -2.69534700 |
| H                                            | -2.93190400                 | -1.85372300 | -3.38431600 |
| H                                            | -2.19593600                 | -2.77930000 | -2.03101300 |
| C                                            | -3.39798000                 | -0.14585800 | 2.07400300  |
| H                                            | -2.44765700                 | -0.67334000 | 2.22592400  |
| H                                            | -3.24443600                 | 0.93573600  | 2.21689000  |
| H                                            | -4.12400600                 | -0.47172600 | 2.83614500  |
| Ni                                           | -6.13948800                 | 0.26022100  | -1.10166300 |
| C                                            | -7.81306000                 | 0.66666600  | -0.10279400 |
| C                                            | -9.05265800                 | 1.00209600  | -0.67045700 |
| C                                            | -7.79056700                 | 0.05730400  | 1.16296900  |
| C                                            | -10.24405400                | 0.69568300  | -0.00790000 |
| H                                            | -9.09530700                 | 1.49703500  | -1.63995100 |
| C                                            | -8.98807100                 | -0.25809500 | 1.81696400  |
| H                                            | -6.84295300                 | -0.16692600 | 1.64708500  |
| C                                            | -10.21906500                | 0.05747300  | 1.23709300  |
| H                                            | -11.19717400                | 0.96200700  | -0.47238400 |
| H                                            | -8.94779400                 | -0.74867400 | 2.79324000  |
| H                                            | -11.15168100                | -0.18170300 | 1.75423300  |

|    |             |            |             |
|----|-------------|------------|-------------|
| Br | -7.17326300 | 0.42517600 | -3.27868800 |
| C  | -6.51392300 | 2.34400900 | -0.60210600 |
| C  | -5.16174000 | 2.60170600 | -1.26675000 |
| H  | -4.31501000 | 2.28670100 | -0.64282500 |
| H  | -5.06437200 | 2.17265500 | -2.27356000 |
| H  | -5.09625500 | 3.69978600 | -1.38743300 |
| H  | -7.31815200 | 2.70006500 | -1.25050200 |
| C  | -6.56569800 | 2.90752400 | 0.80142100  |
| H  | -7.58235300 | 2.93153300 | 1.21220100  |
| H  | -5.91979500 | 2.32549000 | 1.47258200  |
| H  | -6.17602500 | 3.94075700 | 0.77039600  |

UB3LYP-D3/def2-TZVPP-CPCM(DMA)// UB3LYP-D3/def2-SVP-CPCM(THF)  
HF= -4778.30356914  
UM06/def2-TZVPP-CPCM(DMA)// UB3LYP-D3/def2-SVP-CPCM(THF)  
HF= -4777.52976312

**1C'-TSAd**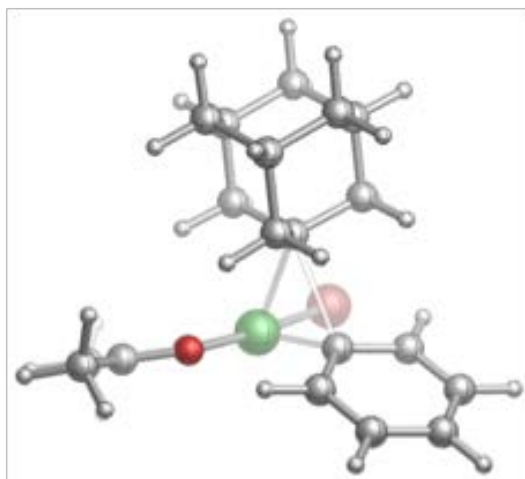

|                                              |              |             |                             |
|----------------------------------------------|--------------|-------------|-----------------------------|
| Zero-point correction=                       |              |             | 0.437403 (Hartree/Particle) |
| Thermal correction to Energy=                |              |             | 0.461446                    |
| Thermal correction to Enthalpy=              |              |             | 0.462390                    |
| Thermal correction to Gibbs Free Energy=     |              |             | 0.382978                    |
| Sum of electronic and zero-point Energies=   |              |             | -5047.979137                |
| Sum of electronic and thermal Energies=      |              |             | -5047.955094                |
| Sum of electronic and thermal Enthalpies=    |              |             | -5047.954150                |
| Sum of electronic and thermal Free Energies= |              |             | -5048.033562                |
| C                                            | -4.15139200  | -0.32333600 | 0.86761600                  |
| O                                            | -5.33202900  | 0.08503200  | 0.60028300                  |
| C                                            | -3.28524600  | -0.92518300 | -0.05312300                 |
| H                                            | -2.29807700  | -1.24196500 | 0.28039100                  |
| C                                            | -3.67414100  | -1.18129800 | -1.38283800                 |
| O                                            | -4.79198000  | -0.84913700 | -1.88498500                 |
| C                                            | -2.74210200  | -1.91202600 | -2.31851000                 |
| H                                            | -3.20762500  | -2.86806000 | -2.60894000                 |
| H                                            | -2.62121000  | -1.32162500 | -3.24013500                 |
| H                                            | -1.75870800  | -2.10984600 | -1.87251700                 |
| C                                            | -3.72030600  | -0.10058300 | 2.29585600                  |
| H                                            | -4.45272300  | -0.56802400 | 2.97288600                  |
| H                                            | -2.71979700  | -0.50074500 | 2.50485600                  |
| H                                            | -3.73066700  | 0.98136300  | 2.50662900                  |
| Ni                                           | -6.24602900  | 0.14729400  | -1.08859200                 |
| C                                            | -7.98762200  | 0.57629700  | -0.17833400                 |
| C                                            | -9.20253900  | 0.66459100  | -0.87981900                 |
| C                                            | -8.03340200  | 0.19172400  | 1.17451300                  |
| C                                            | -10.41614200 | 0.34639100  | -0.26192300                 |
| H                                            | -9.20741400  | 0.97120500  | -1.92361800                 |
| C                                            | -9.24668200  | -0.12980900 | 1.79215800                  |
| H                                            | -7.11224400  | 0.13968000  | 1.75013500                  |
| C                                            | -10.44603100 | -0.05293300 | 1.07805200                  |
| H                                            | -11.34361400 | 0.41580200  | -0.83693300                 |

|    |              |             |             |
|----|--------------|-------------|-------------|
| H  | -9.24851800  | -0.43760300 | 2.84154300  |
| H  | -11.39547300 | -0.29623200 | 1.56217100  |
| Br | -7.11843200  | 0.19947500  | -3.36062400 |
| C  | -5.28375200  | 2.52892500  | -1.24878000 |
| H  | -5.30605900  | 2.19079400  | -2.29364600 |
| H  | -4.52331400  | 1.95547200  | -0.70399300 |
| C  | -6.66621600  | 2.43410400  | -0.59177100 |
| C  | -4.85052900  | 4.03020500  | -1.22245600 |
| H  | -3.85529700  | 4.08862300  | -1.69206100 |
| C  | -5.86741000  | 4.86152700  | -2.01666000 |
| H  | -5.89981800  | 4.52240400  | -3.06533100 |
| H  | -5.56363200  | 5.92190700  | -2.02670500 |
| C  | -7.69195500  | 3.21864500  | -1.38395500 |
| H  | -8.68517300  | 3.14425400  | -0.92525600 |
| H  | -7.75299900  | 2.84885700  | -2.41591000 |
| C  | -7.25041000  | 4.71496200  | -1.36622500 |
| H  | -8.00136400  | 5.28767600  | -1.93433800 |
| C  | -7.19782800  | 5.20698000  | 0.09103600  |
| H  | -6.91456200  | 6.27252200  | 0.11987200  |
| H  | -8.19384400  | 5.12403000  | 0.55743900  |
| C  | -6.61585500  | 2.87362600  | 0.85785500  |
| H  | -5.90737800  | 2.25638300  | 1.42358300  |
| H  | -7.60348100  | 2.79088600  | 1.32881700  |
| C  | -4.78425100  | 4.50871200  | 0.23563300  |
| H  | -4.04311600  | 3.91510700  | 0.79703700  |
| H  | -4.45395100  | 5.56043200  | 0.27309400  |
| C  | -6.17330500  | 4.36820400  | 0.87545500  |
| H  | -6.14156600  | 4.69343500  | 1.92815500  |

UB3LYP-D3/def2-TZVPP-CPCM(DMA)// UB3LYP-D3/def2-SVP-CPCM(THF)  
HF= -5049.99792520  
UM06/def2-TZVPP-CPCM(DMA)// UB3LYP-D3/def2-SVP-CPCM(THF)  
HF= -5048.99950709

**1C''-TS<sup>i</sup>-Pr**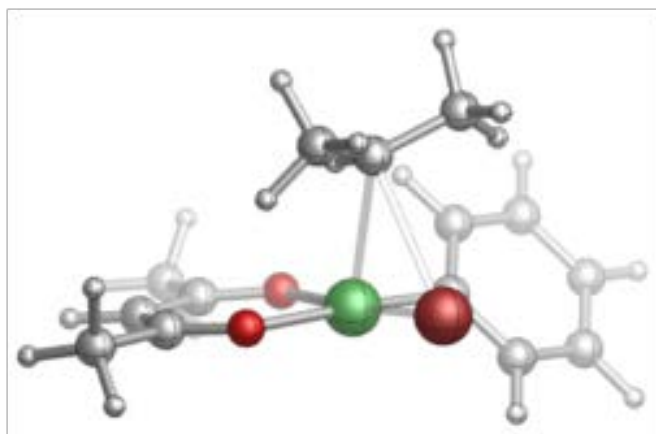

|                                              |                             |             |             |
|----------------------------------------------|-----------------------------|-------------|-------------|
| Zero-point correction=                       | 0.295724 (Hartree/Particle) |             |             |
| Thermal correction to Energy=                | 0.316798                    |             |             |
| Thermal correction to Enthalpy=              | 0.317742                    |             |             |
| Thermal correction to Gibbs Free Energy=     | 0.244376                    |             |             |
| Sum of electronic and zero-point Energies=   | -4776.696349                |             |             |
| Sum of electronic and thermal Energies=      | -4776.675275                |             |             |
| Sum of electronic and thermal Enthalpies=    | -4776.674331                |             |             |
| Sum of electronic and thermal Free Energies= | -4776.747697                |             |             |
| C                                            | -5.04608300                 | -1.01406600 | 1.21106900  |
| O                                            | -5.32751400                 | 0.16285200  | 1.62034400  |
| C                                            | -3.95817400                 | -1.36070000 | 0.39392100  |
| H                                            | -3.83217900                 | -2.40749900 | 0.11902000  |
| C                                            | -3.01109300                 | -0.42613100 | -0.07225700 |
| O                                            | -3.04483700                 | 0.82052700  | 0.17074100  |
| C                                            | -1.83955400                 | -0.89548300 | -0.90294300 |
| H                                            | -1.92024200                 | -1.94887900 | -1.20229400 |
| H                                            | -1.75036900                 | -0.26041400 | -1.79788800 |
| H                                            | -0.91319000                 | -0.76089700 | -0.31938400 |
| C                                            | -6.00259300                 | -2.08229600 | 1.68641000  |
| H                                            | -6.03083400                 | -2.07627200 | 2.78789300  |
| H                                            | -7.01889000                 | -1.83443700 | 1.33978700  |
| H                                            | -5.73264600                 | -3.08619400 | 1.33347400  |
| Ni                                           | -4.41067800                 | 1.79213500  | 1.23167700  |
| C                                            | -2.57075800                 | 2.20308600  | 3.02216800  |
| C                                            | -2.82417200                 | 3.25030200  | 4.03568000  |
| H                                            | -2.53735600                 | 2.79351300  | 5.00681500  |
| H                                            | -2.21473800                 | 4.14976000  | 3.88032600  |
| H                                            | -3.88908900                 | 3.50542500  | 4.10354200  |
| C                                            | -1.20542500                 | 1.90133300  | 2.53608000  |
| H                                            | -0.75543000                 | 1.23275600  | 3.29992000  |
| H                                            | -1.23654200                 | 1.34670300  | 1.58995900  |
| H                                            | -0.58140300                 | 2.79910800  | 2.43890900  |
| C                                            | -5.79914400                 | 2.69344700  | 2.16757700  |

|    |             |            |            |
|----|-------------|------------|------------|
| C  | -6.17978900 | 2.25492700 | 3.44617500 |
| C  | -6.52459700 | 3.74546800 | 1.58528700 |
| C  | -7.23572400 | 2.86391200 | 4.13724900 |
| H  | -5.65589900 | 1.41241200 | 3.90724800 |
| C  | -7.59492600 | 4.34545600 | 2.26323800 |
| H  | -6.24598500 | 4.11342900 | 0.59465800 |
| C  | -7.94995400 | 3.91227500 | 3.54554300 |
| H  | -7.50686200 | 2.51117100 | 5.13705900 |
| H  | -8.14794900 | 5.16173000 | 1.78842100 |
| H  | -8.77793000 | 4.38672600 | 4.07943700 |
| Br | -3.19307500 | 3.77569500 | 0.91731000 |
| H  | -3.24161700 | 1.33852300 | 3.07332400 |

UB3LYP-D3/def2-TZVPP-CPCM(DMA)// UB3LYP-D3/def2-SVP-CPCM(THF)

HF= -4778.29784834

UM06/def2-TZVPP-CPCM(DMA)// UB3LYP-D3/def2-SVP-CPCM(THF)

HF= -4777.52344646

### 1C''-TSAd

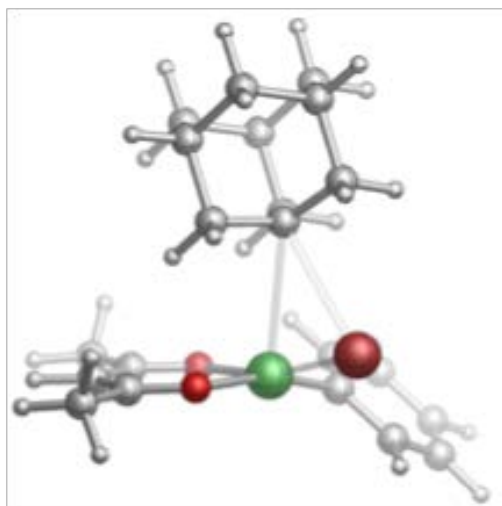

|                                              |              |             |                             |
|----------------------------------------------|--------------|-------------|-----------------------------|
| Zero-point correction=                       |              |             | 0.435959 (Hartree/Particle) |
| Thermal correction to Energy=                |              |             | 0.460362                    |
| Thermal correction to Enthalpy=              |              |             | 0.461306                    |
| Thermal correction to Gibbs Free Energy=     |              |             | 0.380306                    |
| Sum of electronic and zero-point Energies=   |              |             | -5047.974046                |
| Sum of electronic and thermal Energies=      |              |             | -5047.949643                |
| Sum of electronic and thermal Enthalpies=    |              |             | -5047.948699                |
| Sum of electronic and thermal Free Energies= |              |             | -5048.029699                |
| C                                            | -4.70640500  | -0.24338900 | 0.58006500                  |
| O                                            | -5.97458200  | -0.12831900 | 0.47699400                  |
| C                                            | -3.85228100  | -0.76873500 | -0.40277800                 |
| H                                            | -2.78784300  | -0.83737700 | -0.18002100                 |
| C                                            | -4.31201900  | -1.22967700 | -1.65667100                 |
| O                                            | -5.51710500  | -1.16812900 | -2.04300200                 |
| C                                            | -3.33209400  | -1.81335900 | -2.64797000                 |
| H                                            | -3.68092300  | -2.81241100 | -2.95423400                 |
| H                                            | -3.32458100  | -1.18588500 | -3.55440000                 |
| H                                            | -2.31077800  | -1.88798900 | -2.25150300                 |
| C                                            | -4.13796000  | 0.25448500  | 1.88799800                  |
| H                                            | -3.05636400  | 0.08748700  | 1.97593300                  |
| H                                            | -4.34547400  | 1.33343400  | 1.97952500                  |
| H                                            | -4.65733200  | -0.24303300 | 2.72225700                  |
| Ni                                           | -7.06881100  | -0.54722400 | -1.01368500                 |
| C                                            | -8.60538600  | -0.38655400 | 0.10336900                  |
| C                                            | -8.68547700  | 0.51094000  | 1.18279500                  |
| C                                            | -9.66517000  | -1.30313800 | -0.04643800                 |
| C                                            | -9.78274500  | 0.52056400  | 2.05456800                  |
| H                                            | -7.86177200  | 1.20203100  | 1.36953200                  |
| C                                            | -10.75773200 | -1.31420800 | 0.83143800                  |
| H                                            | -9.64558000  | -2.01968100 | -0.87083800                 |
| C                                            | -10.82770600 | -0.39436100 | 1.88335900                  |

|    |              |             |             |
|----|--------------|-------------|-------------|
| H  | -9.81496200  | 1.24065900  | 2.87856800  |
| H  | -11.56155900 | -2.04311400 | 0.68677900  |
| H  | -11.68402100 | -0.39280000 | 2.56374300  |
| Br | -8.31327900  | -0.51928400 | -3.01682200 |
| C  | -7.41274300  | 4.85063700  | -2.19040200 |
| H  | -7.04767900  | 5.88730600  | -2.27380500 |
| H  | -8.47811100  | 4.90440700  | -1.91455800 |
| C  | -6.61749100  | 4.10709200  | -1.10810600 |
| H  | -6.75092400  | 4.58013100  | -0.12309100 |
| C  | -7.24506500  | 4.12846500  | -3.53562100 |
| H  | -7.83647000  | 4.62051700  | -4.32301200 |
| C  | -5.76139800  | 4.05320100  | -3.93024100 |
| H  | -5.35591700  | 5.07032300  | -4.05623700 |
| H  | -5.64836100  | 3.53864300  | -4.89788200 |
| C  | -5.12920000  | 4.03202000  | -1.48564400 |
| H  | -4.56189000  | 3.50136600  | -0.70414600 |
| H  | -4.71189100  | 5.04971300  | -1.55445600 |
| C  | -4.97413900  | 3.31588400  | -2.83695500 |
| H  | -3.91267100  | 3.21821500  | -3.11167500 |
| C  | -5.53837000  | 1.83511100  | -2.68920300 |
| H  | -5.43283400  | 1.29008600  | -3.63465600 |
| H  | -4.98455500  | 1.32238000  | -1.89644300 |
| C  | -7.17747600  | 2.62440500  | -0.97500200 |
| H  | -8.23936600  | 2.64724600  | -0.70277200 |
| H  | -6.60664700  | 2.09380900  | -0.20610700 |
| C  | -7.80033700  | 2.65138900  | -3.39786300 |
| H  | -8.86019700  | 2.67321400  | -3.11572600 |
| H  | -7.68131800  | 2.12275100  | -4.35041500 |
| C  | -6.94726400  | 2.08232300  | -2.32846000 |

UB3LYP-D3/def2-TZVPP-CPCM(DMA)// UB3LYP-D3/def2-SVP-CPCM(THF)  
HF= -5050.00227554  
UM06/def2-TZVPP-CPCM(DMA)// UB3LYP-D3/def2-SVP-CPCM(THF)  
HF= -5049.00355154



**3C-TS<sup>i</sup>-Pr**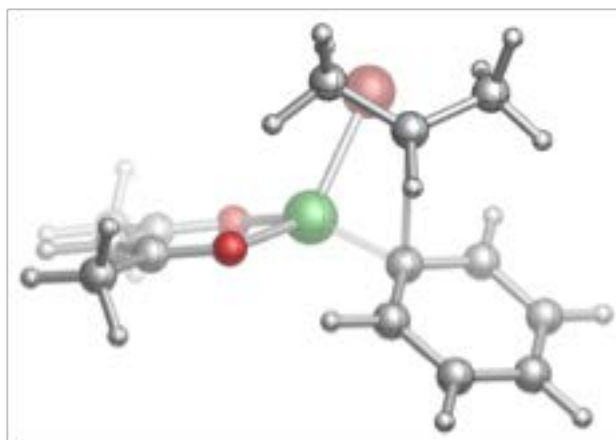

|                                              |             |             |                             |
|----------------------------------------------|-------------|-------------|-----------------------------|
| Zero-point correction=                       |             |             | 0.291168 (Hartree/Particle) |
| Thermal correction to Energy=                |             |             | 0.314140                    |
| Thermal correction to Enthalpy=              |             |             | 0.315084                    |
| Thermal correction to Gibbs Free Energy=     |             |             | 0.234321                    |
| Sum of electronic and zero-point Energies=   |             |             | -4776.683307                |
| Sum of electronic and thermal Energies=      |             |             | -4776.660335                |
| Sum of electronic and thermal Enthalpies=    |             |             | -4776.659391                |
| Sum of electronic and thermal Free Energies= |             |             | -4776.740155                |
| C                                            | -2.36118600 | -0.64377600 | 0.45185900                  |
| O                                            | -3.12407300 | 0.38453200  | 0.41725900                  |
| C                                            | -2.78580900 | -1.98098800 | 0.41828900                  |
| H                                            | -2.02349700 | -2.75834000 | 0.45386000                  |
| C                                            | -4.14152700 | -2.37888300 | 0.40968500                  |
| O                                            | -5.12445300 | -1.57532400 | 0.35697800                  |
| C                                            | -4.49654500 | -3.84327300 | 0.48017400                  |
| H                                            | -5.11652200 | -4.01802700 | 1.37437500                  |
| H                                            | -5.11524600 | -4.10273900 | -0.39380100                 |
| H                                            | -3.61609400 | -4.49770600 | 0.51421700                  |
| C                                            | -0.89165200 | -0.31740600 | 0.54991400                  |
| H                                            | -0.71761600 | 0.28210100  | 1.45786000                  |
| H                                            | -0.25571800 | -1.21146100 | 0.57453900                  |
| H                                            | -0.61047800 | 0.31243000  | -0.30920600                 |
| Ni                                           | -5.02932200 | 0.35599300  | 0.15613900                  |
| C                                            | -5.28126300 | 2.24073700  | 0.47824200                  |
| C                                            | -6.58594000 | 2.74199900  | 0.42739100                  |
| C                                            | -4.21984700 | 3.01190600  | 0.95673400                  |
| C                                            | -6.84311500 | 4.01928800  | 0.94287500                  |
| H                                            | -7.39661700 | 2.14897500  | 0.00031200                  |
| C                                            | -4.49017800 | 4.29328700  | 1.45962300                  |
| H                                            | -3.20813100 | 2.61056000  | 0.95600400                  |
| C                                            | -5.79496800 | 4.79583100  | 1.45187400                  |
| H                                            | -7.86489500 | 4.40854200  | 0.93342600                  |
| H                                            | -3.66792500 | 4.90225700  | 1.84538300                  |

|    |             |            |             |
|----|-------------|------------|-------------|
| H  | -5.99591200 | 5.79966300 | 1.83490400  |
| Br | -5.82173700 | 0.50856100 | -2.05487700 |
| C  | -2.99932200 | 3.69583100 | -1.82226500 |
| C  | -2.43639500 | 2.38994100 | -2.26258900 |
| H  | -2.47089500 | 2.27999300 | -3.36550800 |
| H  | -1.39395400 | 2.25214000 | -1.93660100 |
| H  | -3.03033300 | 1.54850300 | -1.85893200 |
| C  | -4.31868200 | 4.17966700 | -2.31192400 |
| H  | -4.23469800 | 4.66402400 | -3.30939100 |
| H  | -5.02961500 | 3.34405400 | -2.42737500 |
| H  | -4.76335300 | 4.92062300 | -1.62850200 |
| H  | -2.40445600 | 4.34732800 | -1.17510300 |

UB3LYP-D3/def2-TZVPP-CPCM(DMA)// UB3LYP-D3/def2-SVP-CPCM(THF)

HF= -4778.28000251

UM06/def2-TZVPP-CPCM(DMA)// UB3LYP-D3/def2-SVP-CPCM(THF)

HF= -4777.49651484

### *i*Pr-Br

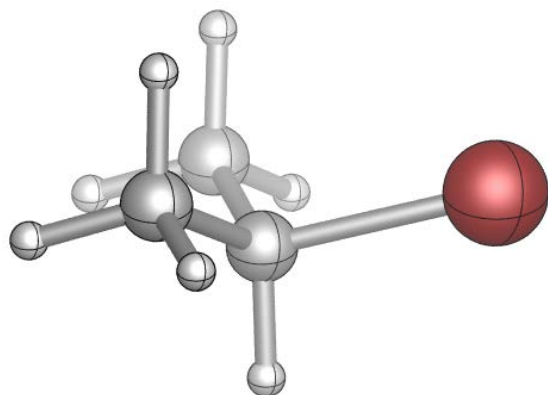

Zero-point correction= 0.093570 (Hartree/Particle)  
Thermal correction to Energy= 0.098960  
Thermal correction to Enthalpy= 0.099905  
Thermal correction to Gibbs Free Energy= 0.064321  
Sum of electronic and zero-point Energies= -2692.245354  
Sum of electronic and thermal Energies= -2692.239964  
Sum of electronic and thermal Enthalpies= -2692.239020  
Sum of electronic and thermal Free Energies= -2692.274603

|    |             |            |            |
|----|-------------|------------|------------|
| C  | -1.76973700 | 2.94632600 | 2.80829800 |
| C  | -1.50495700 | 2.87037900 | 1.31519000 |
| H  | -0.41627400 | 2.79919900 | 1.14944300 |
| H  | -1.97839200 | 1.97918900 | 0.87478400 |
| H  | -1.87574800 | 3.76236000 | 0.79039500 |
| Br | -3.74989200 | 3.16938400 | 3.11257100 |
| C  | -1.28411200 | 1.73632900 | 3.58641000 |
| H  | -0.19151300 | 1.64615500 | 3.46014100 |
| H  | -1.50019600 | 1.82967400 | 4.66027400 |
| H  | -1.75050200 | 0.81207500 | 3.21146000 |
| H  | -1.35916500 | 3.87336400 | 3.23130400 |

UB3LYP-D3/def2-TZVPP-CPCM(DMA)// UB3LYP-D3/def2-SVP-CPCM(THF)

HF= -2692.78972539

UM06/def2-TZVPP-CPCM(DMA)// UB3LYP-D3/def2-SVP-CPCM(THF)

HF= -2692.55656411

### Ad-Br

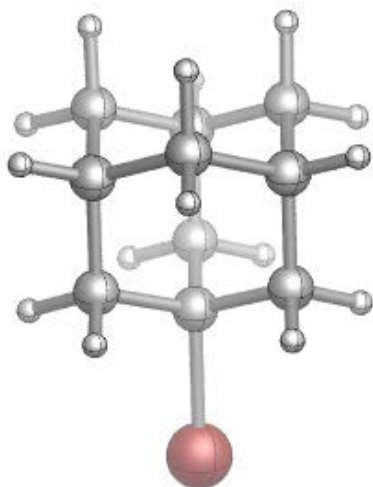

|                                              |                             |             |             |
|----------------------------------------------|-----------------------------|-------------|-------------|
| Zero-point correction=                       | 0.233256 (Hartree/Particle) |             |             |
| Thermal correction to Energy=                | 0.241651                    |             |             |
| Thermal correction to Enthalpy=              | 0.242595                    |             |             |
| Thermal correction to Gibbs Free Energy=     | 0.199568                    |             |             |
| Sum of electronic and zero-point Energies=   | -2963.523396                |             |             |
| Sum of electronic and thermal Energies=      | -2963.515001                |             |             |
| Sum of electronic and thermal Enthalpies=    | -2963.514057                |             |             |
| Sum of electronic and thermal Free Energies= | -2963.557084                |             |             |
| C                                            | -1.88329500                 | 1.37104900  | -0.00315300 |
| H                                            | -0.78191400                 | 1.37449800  | 0.00737900  |
| H                                            | -2.22085500                 | 2.41940600  | 0.00779100  |
| C                                            | -2.41569700                 | 0.63798100  | 1.23278300  |
| C                                            | -2.40864800                 | 0.64841100  | -1.26606800 |
| H                                            | -2.02694600                 | 1.17358800  | -2.15702900 |
| C                                            | -1.91092000                 | -0.81021500 | -1.26434300 |
| H                                            | -0.80809900                 | -0.83507000 | -1.28427500 |
| H                                            | -2.26341100                 | -1.32960300 | -2.17139100 |
| C                                            | -1.91038800                 | -0.80883400 | 1.25596600  |
| H                                            | -2.26836300                 | -1.31683900 | 2.16532200  |
| H                                            | -0.80930600                 | -0.82190600 | 1.27737400  |
| C                                            | -2.43463400                 | -1.53167700 | -0.00756200 |
| H                                            | -2.07298600                 | -2.57298400 | 0.00601100  |
| C                                            | -3.97509900                 | -1.51171600 | -0.00439200 |
| H                                            | -4.36116700                 | -2.04310000 | -0.89055900 |
| H                                            | -4.35988500                 | -2.04142200 | 0.88367200  |
| C                                            | -3.94751600                 | 0.67076200  | 1.25572500  |
| H                                            | -4.30007200                 | 1.71402200  | 1.27552400  |
| H                                            | -4.32001500                 | 0.17411300  | 2.16540400  |
| C                                            | -3.94917600                 | 0.67029900  | -1.26386000 |
| H                                            | -4.31347900                 | 1.71155400  | -1.28172800 |
| H                                            | -4.33425000                 | 0.17570100  | -2.17139400 |

C        -4.47192100 -0.05272800 -0.00743600  
H        -5.57405200 -0.03143000  0.00639700  
Br       -1.72961200  1.58334000  2.88316800  
UB3LYP-D3/def2-TZVPP-CPCM(DMA)// UB3LYP-D3/def2-SVP-CPCM(THF)  
HF= -2692.78972539  
UM06/def2-TZVPP-CPCM(DMA)// UB3LYP-D3/def2-SVP-CPCM(THF)  
HF= -2692.55656411

## Ad-Ph

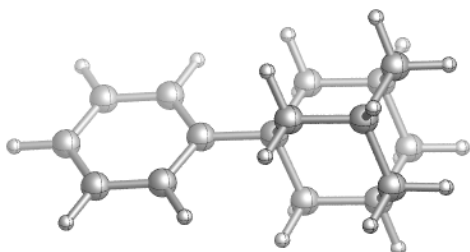

|                                              |                             |             |             |
|----------------------------------------------|-----------------------------|-------------|-------------|
| Zero-point correction=                       | 0.324546 (Hartree/Particle) |             |             |
| Thermal correction to Energy=                | 0.335948                    |             |             |
| Thermal correction to Enthalpy=              | 0.336892                    |             |             |
| Thermal correction to Gibbs Free Energy=     | 0.287610                    |             |             |
| Sum of electronic and zero-point Energies=   | -621.049416                 |             |             |
| Sum of electronic and thermal Energies=      | -621.038014                 |             |             |
| Sum of electronic and thermal Enthalpies=    | -621.037070                 |             |             |
| Sum of electronic and thermal Free Energies= | -621.086353                 |             |             |
| C                                            | -9.05162300                 | 0.85471200  | 0.04815300  |
| C                                            | -8.76142400                 | 0.74758300  | 1.42334000  |
| C                                            | -10.16553900                | 0.14499500  | -0.43192500 |
| C                                            | -9.54413700                 | -0.03042700 | 2.27881000  |
| H                                            | -7.90510000                 | 1.28308600  | 1.83989900  |
| C                                            | -10.95474300                | -0.63687700 | 0.42163000  |
| H                                            | -10.43668600                | 0.19213500  | -1.48658400 |
| C                                            | -10.64968800                | -0.73005800 | 1.78097200  |
| H                                            | -9.28914200                 | -0.09075600 | 3.34040300  |
| H                                            | -11.81463900                | -1.17621500 | 0.01482700  |
| H                                            | -11.26506400                | -1.34040000 | 2.44703400  |
| C                                            | -7.75260900                 | 4.04495400  | -2.68996900 |
| H                                            | -7.11367000                 | 4.69035700  | -3.31727000 |
| H                                            | -8.78114200                 | 4.43953100  | -2.76026000 |
| C                                            | -7.27177300                 | 4.08183800  | -1.22799900 |
| H                                            | -7.30785900                 | 5.11786900  | -0.85006300 |
| C                                            | -7.70650700                 | 2.59392500  | -3.20303400 |
| H                                            | -8.06397000                 | 2.55806500  | -4.24614000 |
| C                                            | -6.26146400                 | 2.06767800  | -3.13250800 |
| H                                            | -5.60116700                 | 2.68458200  | -3.76635600 |
| H                                            | -6.21435600                 | 1.03603700  | -3.52239900 |
| C                                            | -5.82724500                 | 3.55160200  | -1.14811100 |
| H                                            | -5.46724600                 | 3.58930600  | -0.10516500 |
| H                                            | -5.15543600                 | 4.19174800  | -1.74563400 |
| C                                            | -5.77961700                 | 2.10281000  | -1.67094500 |
| H                                            | -4.74640800                 | 1.72033500  | -1.61021100 |
| C                                            | -6.69528200                 | 1.21605600  | -0.80637400 |
| H                                            | -6.66147600                 | 0.17105500  | -1.15967100 |
| H                                            | -6.32977800                 | 1.21373200  | 0.23318200  |

|   |             |            |             |
|---|-------------|------------|-------------|
| C | -8.18905000 | 3.19860600 | -0.36157700 |
| H | -9.22626000 | 3.57420400 | -0.39577800 |
| H | -7.86515600 | 3.25088600 | 0.69044200  |
| C | -8.62079800 | 1.71159200 | -2.33219600 |
| H | -9.65923600 | 2.07586400 | -2.40624800 |
| H | -8.61137500 | 0.67811800 | -2.71792900 |
| C | -8.16600400 | 1.72198700 | -0.85193500 |

UB3LYP-D3/def2-TZVPP-CPCM(DMA)// UB3LYP-D3/def2-SVP-CPCM(THF)  
HF= -622.03871909  
UM06/def2-TZVPP-CPCM(DMA)// UB3LYP-D3/def2-SVP-CPCM(THF)  
HF= -621.50649605

## ***iPr-Ph***

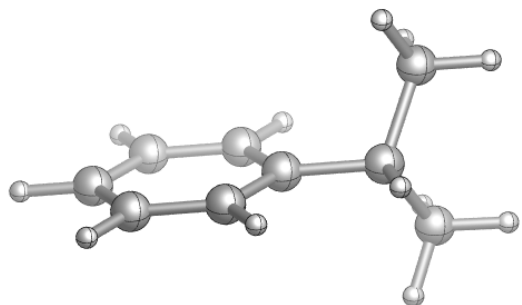

Zero-point correction= 0.184466 (Hartree/Particle)  
Thermal correction to Energy= 0.193027  
Thermal correction to Enthalpy= 0.193971  
Thermal correction to Gibbs Free Energy= 0.150892  
Sum of electronic and zero-point Energies= -349.775767  
Sum of electronic and thermal Energies= -349.767205  
Sum of electronic and thermal Enthalpies= -349.766261  
Sum of electronic and thermal Free Energies= -349.809340

|   |              |             |             |
|---|--------------|-------------|-------------|
| C | -7.85943500  | 1.84940600  | 0.01558800  |
| C | -9.01702800  | 1.45077700  | -0.67127300 |
| C | -7.00753200  | 0.84660600  | 0.51272700  |
| C | -9.31823500  | 0.09662500  | -0.85914900 |
| H | -9.69435700  | 2.21412100  | -1.06585100 |
| C | -7.30281600  | -0.50701700 | 0.32813500  |
| H | -6.09905000  | 1.12607500  | 1.05317600  |
| C | -8.46112100  | -0.88852700 | -0.35980900 |
| H | -10.22624400 | -0.18796500 | -1.39771100 |
| H | -6.62558100  | -1.26896300 | 0.72361700  |
| H | -8.69289700  | -1.94693800 | -0.50445000 |
| C | -7.53947100  | 3.32441200  | 0.21624600  |
| C | -6.22164800  | 3.71973500  | -0.47099300 |
| H | -5.36471200  | 3.18920800  | -0.02409600 |
| H | -6.24387100  | 3.47828000  | -1.54546900 |
| H | -6.03644800  | 4.80119500  | -0.36592400 |
| H | -8.34966000  | 3.89909500  | -0.26480700 |
| C | -7.52492300  | 3.70544400  | 1.70627000  |
| H | -8.48052200  | 3.45256900  | 2.19213900  |
| H | -6.72234500  | 3.17529600  | 2.24515400  |
| H | -7.35204200  | 4.78702500  | 1.82998700  |

UB3LYP-D3/def2-TZVPP-CPCM(DMA)// UB3LYP-D3/def2-SVP-CPCM(THF)

HF= -350.34501770

UM06/def2-TZVPP-CPCM(DMA)// UB3LYP-D3/def2-SVP-CPCM(THF)

HF= -350.03343472



## F. References

- (a) Lee, C.; Yang, W.; Parr, R. G., Development of the Colle-Salvetti Correlation-Energy Formula into a Functional of the Electron Density. *Phys. Rev. B* **1988**, *37*, 785-789. (b) Becke, A. D., Density-Functional Thermochemistry. III. The Role of Exact Exchange. *J. Chem. Phys.* **1993**, *98*, 5648-5652.
- (a) Grimme, S. Accurate description of van der Waals complexes by density functional theory including empirical corrections. *J. Comput. Chem.* **2004**, *25*, 1463-1473. (b) Grimme, S.; Antony, J.; Ehrlich, S.; Krieg, H. A consistent and accurate *ab initio* parametrization of density functional dispersion correction (DFT-D) for the 94 elements H-Pu. *J. Chem. Phys.* **2010**, *132*, 154104. (c) Grimme, S. Density functional theory with London dispersion corrections. *WIREs Comput. Mol. Sci.* **2011**, *1*, 211-228. (d) Ehrlich, S.; Moellmann, J.; Grimme, S. Dispersion-Corrected Density Functional Theory for Aromatic Interactions in Complex Systems. *Acc. Chem. Res.* **2012**, *46*, 916-926.
- (a) Weigend, F.; Ahlrichs, R. Balanced basis sets of split valence, triple zeta valence and quadruple zeta valence quality for H to Rn: Design and assessment of accuracy. *Phys. Chem. Chem. Phys.* **2005**, *7*, 3297-3305. (b) Weigend, F. Accurate Coulomb-fitting basis sets for H to Rn. *Phys. Chem. Chem. Phys.* **2006**, *8*, 1057-1065.
- (a) Klamt, A.; Schüürmann, G. COSMO: a new approach to dielectric screening in solvents with explicit expressions for the screening energy and its gradient. *J. Chem. Soc. Perkin Trans. 2* **1993**, *0*, 799-805. (b) Tomasi, J.; Persico, M. Molecular Interactions in Solution: An Overview of Methods Based on Continuous Distributions of the Solvent. *Chem. Rev.* **1994**, *94*, 2027-2094. (c) Andzelm, J.; Kölmel, C.; Klamt, A. Incorporation of solvent effects into density functional calculations of molecular energies and geometries. *J. Chem. Phys.* **1995**, *103*, 9312-9320. (d) Barone, V.; Cossi, M. Quantum Calculation of Molecular Energies and Energy Gradients in Solution by a Conductor Solvent Model. *J. Phys. Chem. A* **1998**, *102*, 1995-2001. (e) Cossi, M.; Rega, N.; Scalmani, G.; Barone, V. Energies, structures, and electronic properties of molecules in solution with the C-PCM solvation model. *J. Comput. Chem.* **2003**, *24*, 669-681.
- Frisch, M. J. T., G. W.; Schlegel, H. B.; Scuseria, G. E.; Robb, M. A.; Cheeseman, J. R.; Scalmani, G.; Barone, V.; Petersson, G. A.; Nakatsuji, H.; Li, X.; Caricato, M.; Marenich, A.; Bloino, J.; Janesko, B. G.; Gomperts, R.; Mennucci, B.; Hratchian, H. P.; Ortiz, J. V.; Izmaylov, A. F.; Sonnenberg, J. L.; Williams-Young, D.; Ding, F.; Lipparini, F.; Egidi, F.; Goings, J.; Peng, B.; Petrone, A.; Henderson, T.; Ranasinghe, D.; Zakrzewski, V. G.; Gao, J.; Rega, N.; Zheng, G.; Liang, W.; Hada, M.; Ehara, M.; Toyota, K.; Fukuda, R.; Hasegawa, J.; Ishida, M.; Nakajima, T.; Honda, Y.; Kitao, O.; Nakai, H.; Vreven, T.; Throssell, K.; Montgomery, J. A.; Peralta, Jr., J. E.; Ogliaro, F.; Bearpark, M.; Heyd, J. J.; Brothers, E.; Kudin, K. N.; Staroverov, V. N.; Keith, T.; Kobayashi, R.; Normand, J.; Raghavachari, K.; Rendell, A.; Burant, J. C.; Iyengar, S. S.; Tomasi, J.; Cossi, M.; Millam, J. M.; Klene, M.; Adamo, C.; Cammi, R.; Ochterski, J. W.; Martin, R. L.; Morokuma, K.; Farkas, O.; Foresman, J. B.; Fox, D. J. *Gaussian 09, Revision D.01*, Gaussian, Inc., Wallingford CT, 2009.

6. Zhao, Y.; Truhlar, D. G. The M06 Suite of Density Functionals for Main Group Thermochemistry, Thermochemical Kinetics, Noncovalent Interactions, Excited States, and Transition Elements: Two New Functionals and Systematic Testing of Four M06-Class Functionals and 12 Other Functionals. *Theor. Chem. Acc.* **2008**, *120*, 215–241.
7. Riplinger, C.; Sandhoefer, B.; Hansen, A.; Neese, F. Natural Triple Excitations in Local Coupled Cluster Calculations with Pair Natural Orbitals. *J. Chem. Phys.* **2013**, *139*, 134101.
8. Neese, F. The ORCA program system. *Wiley Interdiscip. Rev. Comput. Mol. Sci.* **2012**, *2*, 73–78.
9. (a) Liakos, D. G.; Sparta, M.; Kesharwani, M. K.; Martin, J. M. L.; Neese, F. Exploring the Accuracy Limits of Local Pair Natural Orbital Coupled-Cluster Theory. *J. Chem. Theory Comput.* **2015**, *11*, 1525–1539. (b) Paulechka, E.; Kazakov, A. Efficient DLPNO–CCSD(T)-Based Estimation of Formation Enthalpies for C-, H-, O-, and N-Containing Closed-Shell Compounds Validated Against Critically Evaluated Experimental Data. *J. Phys. Chem. A* **2017**, *121*, 4379–4387.
10. CYLview, 1.0b; Legault, C. Y., Université de Sherbrooke, 2009 (<http://www.cylview.org>)
11. (a) Singleton, D. A.; Wang, Z. H. Isotope Effects and the Nature of Enantioselectivity in the Shi Epoxidation. The Importance of Asynchronicity. *J. Am. Chem. Soc.* **2005**, *127*, 6679–6685. (b) Ussing, B. R.; Hang, C.; Singleton, D. A. Dynamic Effects on the Periselectivity, Rate, Isotope Effects, and Mechanism of Cycloadditions of Ketenes with Cyclopentadiene. *J. Am. Chem. Soc.* **2006**, *128*, 7594–7607.
12. (a) Brittin, W. E. Valence angle of the tetrahedral carbon atom. *J. Chem. Educ.* **1945**, *22*, 145. (b) Miedaner, A.; Haltiwanger, R. C.; DuBois, D. L. Relationship between the bite size of diphosphine ligands and tetrahedral distortions of "square-planar" nickel(II) complexes: stabilization of nickel(I) and palladium(I) complexes using diphosphine ligands with large bites. *Inorg. Chem.* **1991**, *30*, 417. (c) Liu, Y.; Xiao, J.; Wang, L.; Song, Y.; Deng, L. Carbon–Carbon Bond Formation Reactivity of a Four-Coordinate NHC-Supported Iron(II) Phenyl Compound. *Organometallics* **2015**, *34*, 599. (d) Liu, Y.; Luo, L.; Xiao, J.; Wang, L.; Song, Y.; Qu, J.; Luo, Y.; Deng, L. Four-Coordinate Iron(II) Diaryl Compounds with Monodentate N-Heterocyclic Carbene Ligation: Synthesis, Characterization, and Their Tetrahedral-Square Planar Isomerization in Solution. *Inorg. Chem.* **2015**, *54*, 4752.
13. Primer, D. N.; Molander, G. A. Enabling the Cross-Coupling of Tertiary Organoboron Nucleophiles through Radical-Mediated Alkyl Transfer. *J. Am. Chem. Soc.* **2017**, *139*, 9847–9850.
14. Kozuch, S.; Shaik, S. How to Conceptualize Catalytic Cycles? The Energetic Span Model. *Acc. Chem. Res.* **2011**, *44*, 101–110.

15. For a similar system involving *tert*-butyl radical but not photo-chemical system, see: Zultanski, S. L.; Fu, G. C. Nickel-Catalyzed Carbon–Carbon Bond-Forming Reactions of Unactivated Tertiary Alkyl Halides: Suzuki Arylations. *J. Am. Chem. Soc.* **2013**, *135*, 624-627.

16. For information on the construction of LED reactors, see the Supporting Information of: (a) Primer, D. N.; Molander, G. A. Enabling the Cross-Coupling of Tertiary Organoboron Nucleophiles through Radical-Mediated Alkyl Transfer. *J. Am. Chem. Soc.* **2017**, *139*, 9847-9850; (b) Patel, N. R.; Kelly, C. B.; Jouffroy, M.; Molander, G. A. Engaging Alkenyl Halides with Alkylsilicates via Photoredox Dual Catalysis. *Org. Lett.* **2016**, *18*, 764-767; (c) Jouffroy, M.; Kelly, C. B.; Molander, G. A. Thioetherification via Photoredox/Nickel Dual Catalysis. *Org. Lett.* **2016**, *18*, 876-879.

17. Kelly, C. B.; Patel, N. R.; Primer, D. N.; Jouffroy, M.; Tellis, J. C.; Molander, G. A. Preparation of visible-light-activated metal complexes and their use in photoredox/nickel dual catalysis. *Nature protocols*, **2017**, *12*, 472-492.
